# Supplementary material for: A novel approach for obtaining α,β-diaminophosphonates bearing structurally diverse side chains and their interactions with transition metal ions studied by ITC
Source: Royal Society of Chemistry journal article supplement (doi:10.1039/d0ra03764h), 2020-01-01
Supplement: d0ra03764h1.pdf [file d0ra03764h1.pdf]

## Supplementary Information

### **A novel approach for obtaining $\alpha,\beta$ -diaminophosphonates bearing structurally diverse side chains and their interactions with transitions metal ions studied by ITC**

Paweł Lenartowicz,<sup>a\*</sup> Danuta Witkowska,<sup>b</sup> Beata Żyszka-Haberecht,<sup>a</sup> Błażej Dziuk,<sup>a,c</sup> Krzysztof Ejsmont,<sup>a</sup> Jolanta Świątek-Kozłowska<sup>b</sup> and Paweł Kafarski<sup>d</sup>

<sup>a</sup>Faculty of Chemistry, University of Opole, Oleska 48, 45-052 Opole, Poland.

<sup>b</sup>Public Higher Medical Professional School in Opole, Katowicka 68, 45-060 Opole, Poland.

<sup>c</sup>Faculty of Chemistry, Wrocław University of Science and Technology, Wybrzeże Wyspiańskiego 27, 50-370 Wrocław, Poland.

<sup>d</sup>Department of Bioorganic Chemistry, Faculty of Chemistry, Wrocław University of Science and Technology, Wybrzeże Wyspiańskiego 27, 50-370 Wrocław, Poland.

e-mail: pawel.lenartowicz@uni.opole.pl

#### **Table of contents**

|                                                                                             |    |
|---------------------------------------------------------------------------------------------|----|
| 1. Interaction of Zn <sup>2+</sup> ion with three model aminophosponates 2e', 2f', 2g'..... | 2  |
| 2. <sup>1</sup> H, <sup>13</sup> C, <sup>31</sup> P NMR spectra .....                       | 3  |
| 3. Crystallographic data.....                                                               | 96 |

# 1. Interaction of $Zn^{2+}$ ion with three model aminophosponates **2e'**, **2f'**, **2g'**

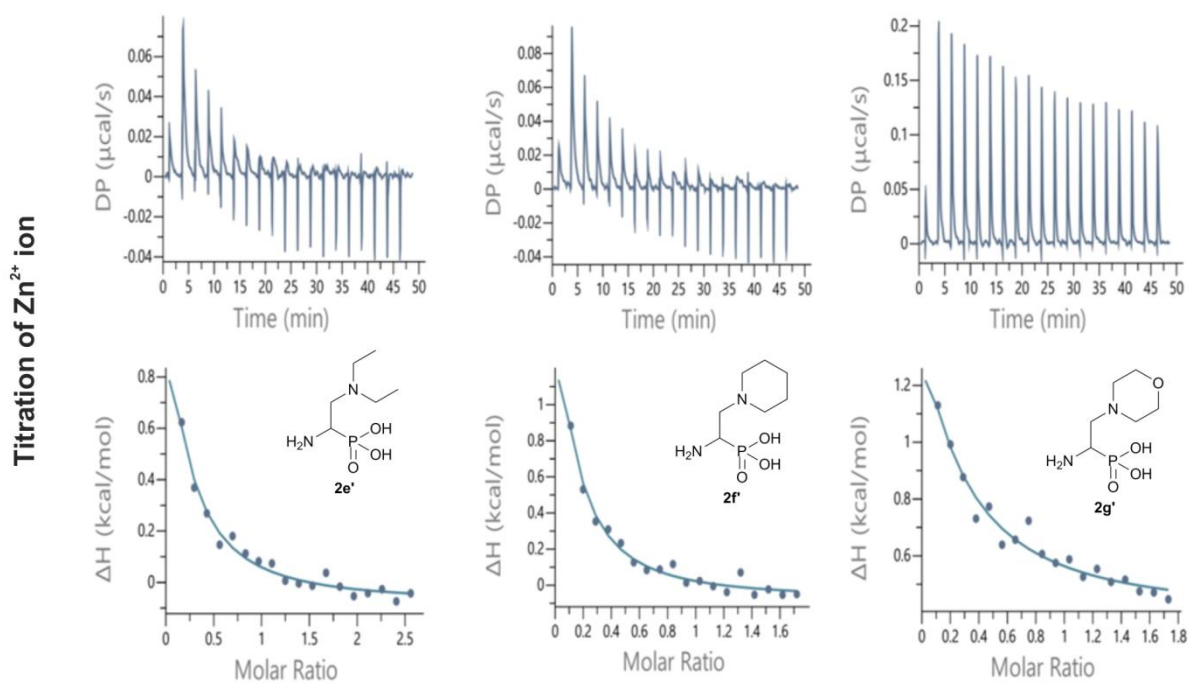

Fig. S11 ITC titration (raw data above and corresponding plots below) of 3 mM  $Zn^{2+}$  to **2e'**, **2f'** and **2g'**

## 2. $^1\text{H}$ , $^{13}\text{C}$ , $^{31}\text{P}$ NMR spectra

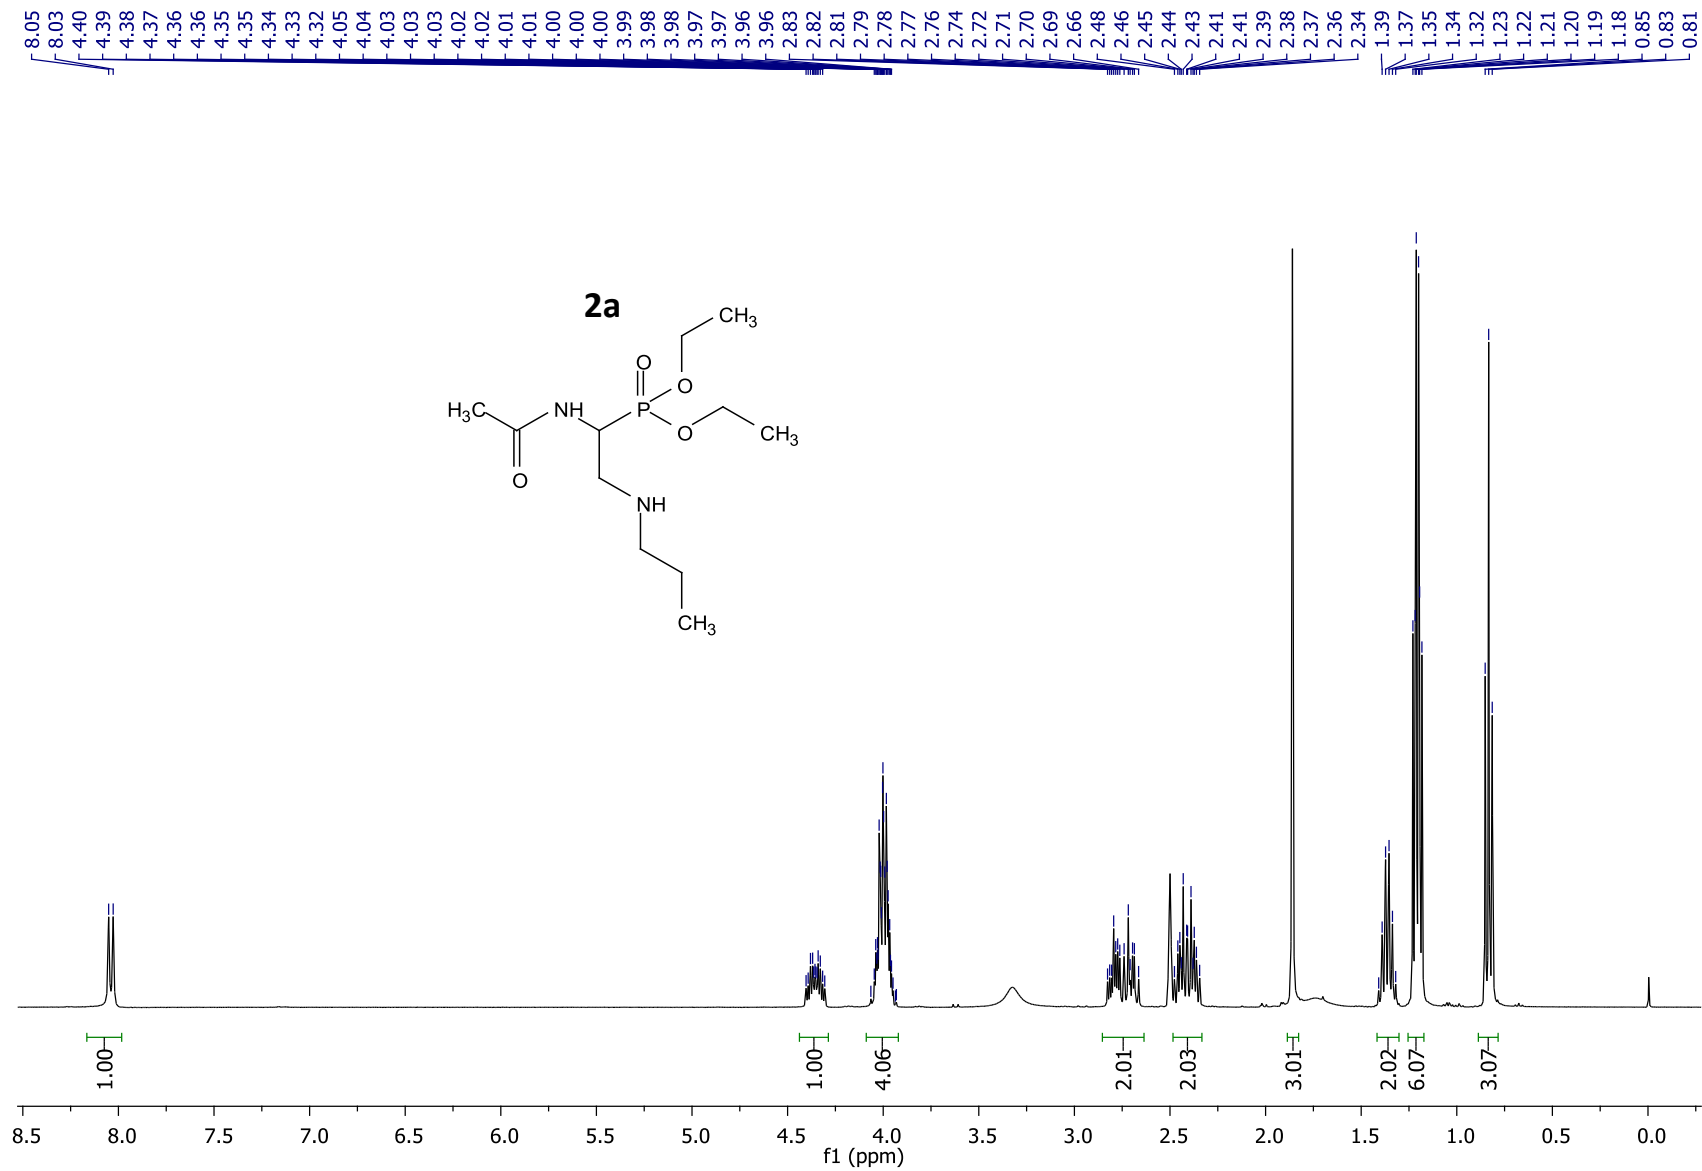

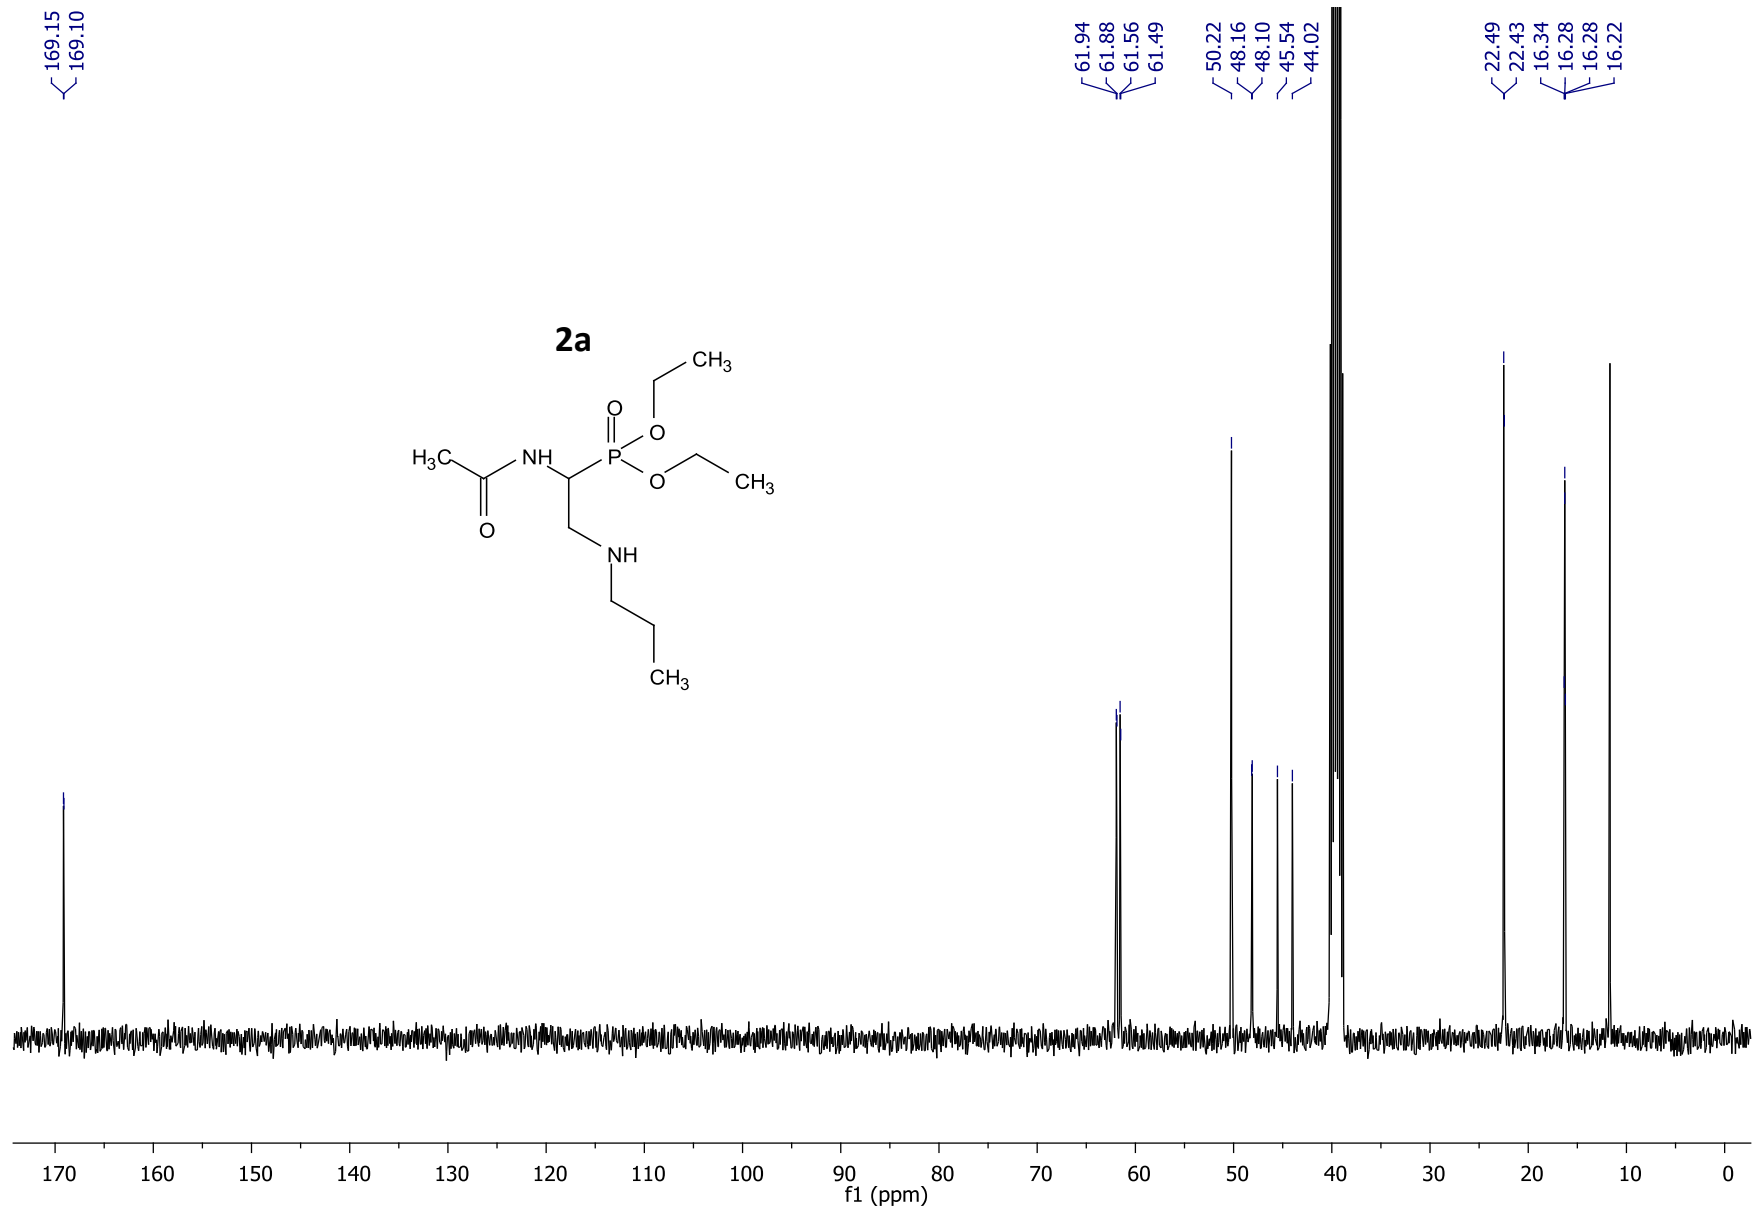

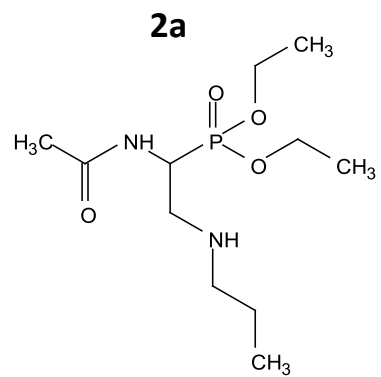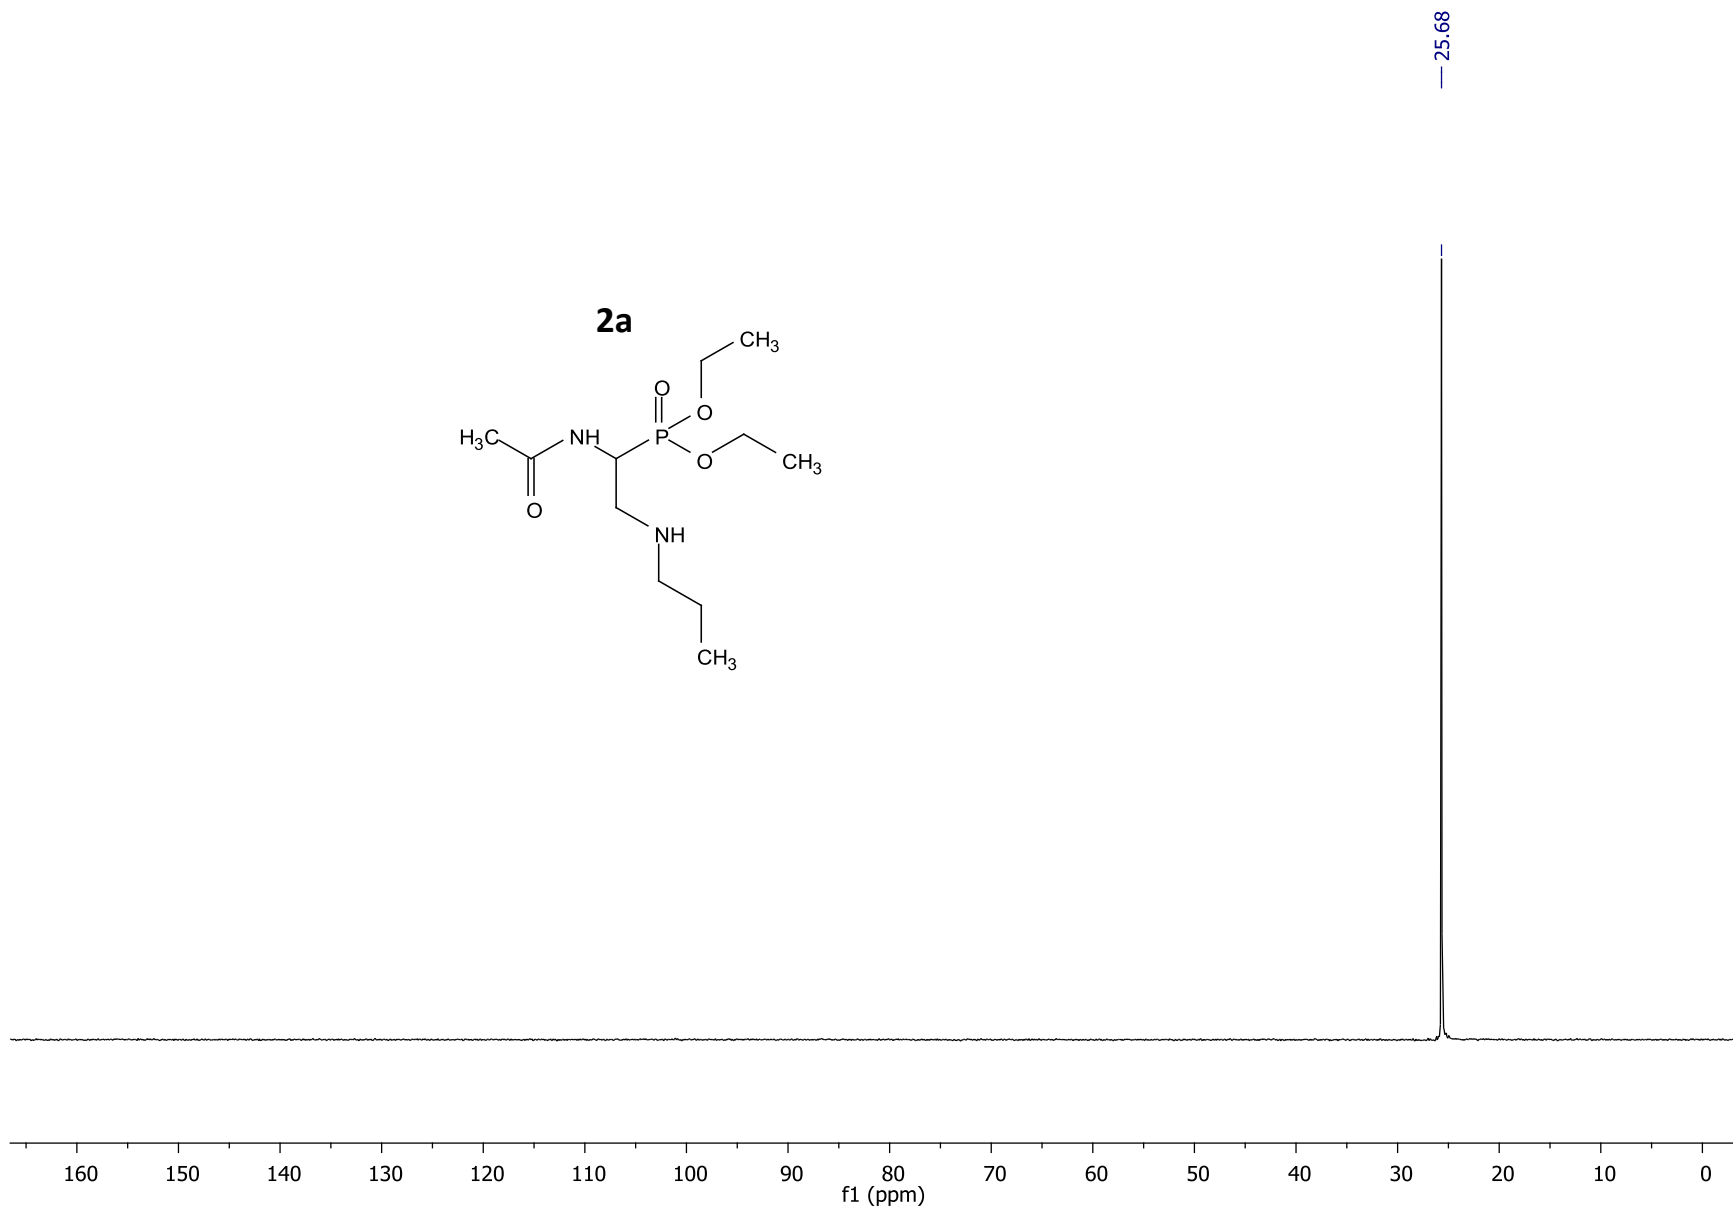

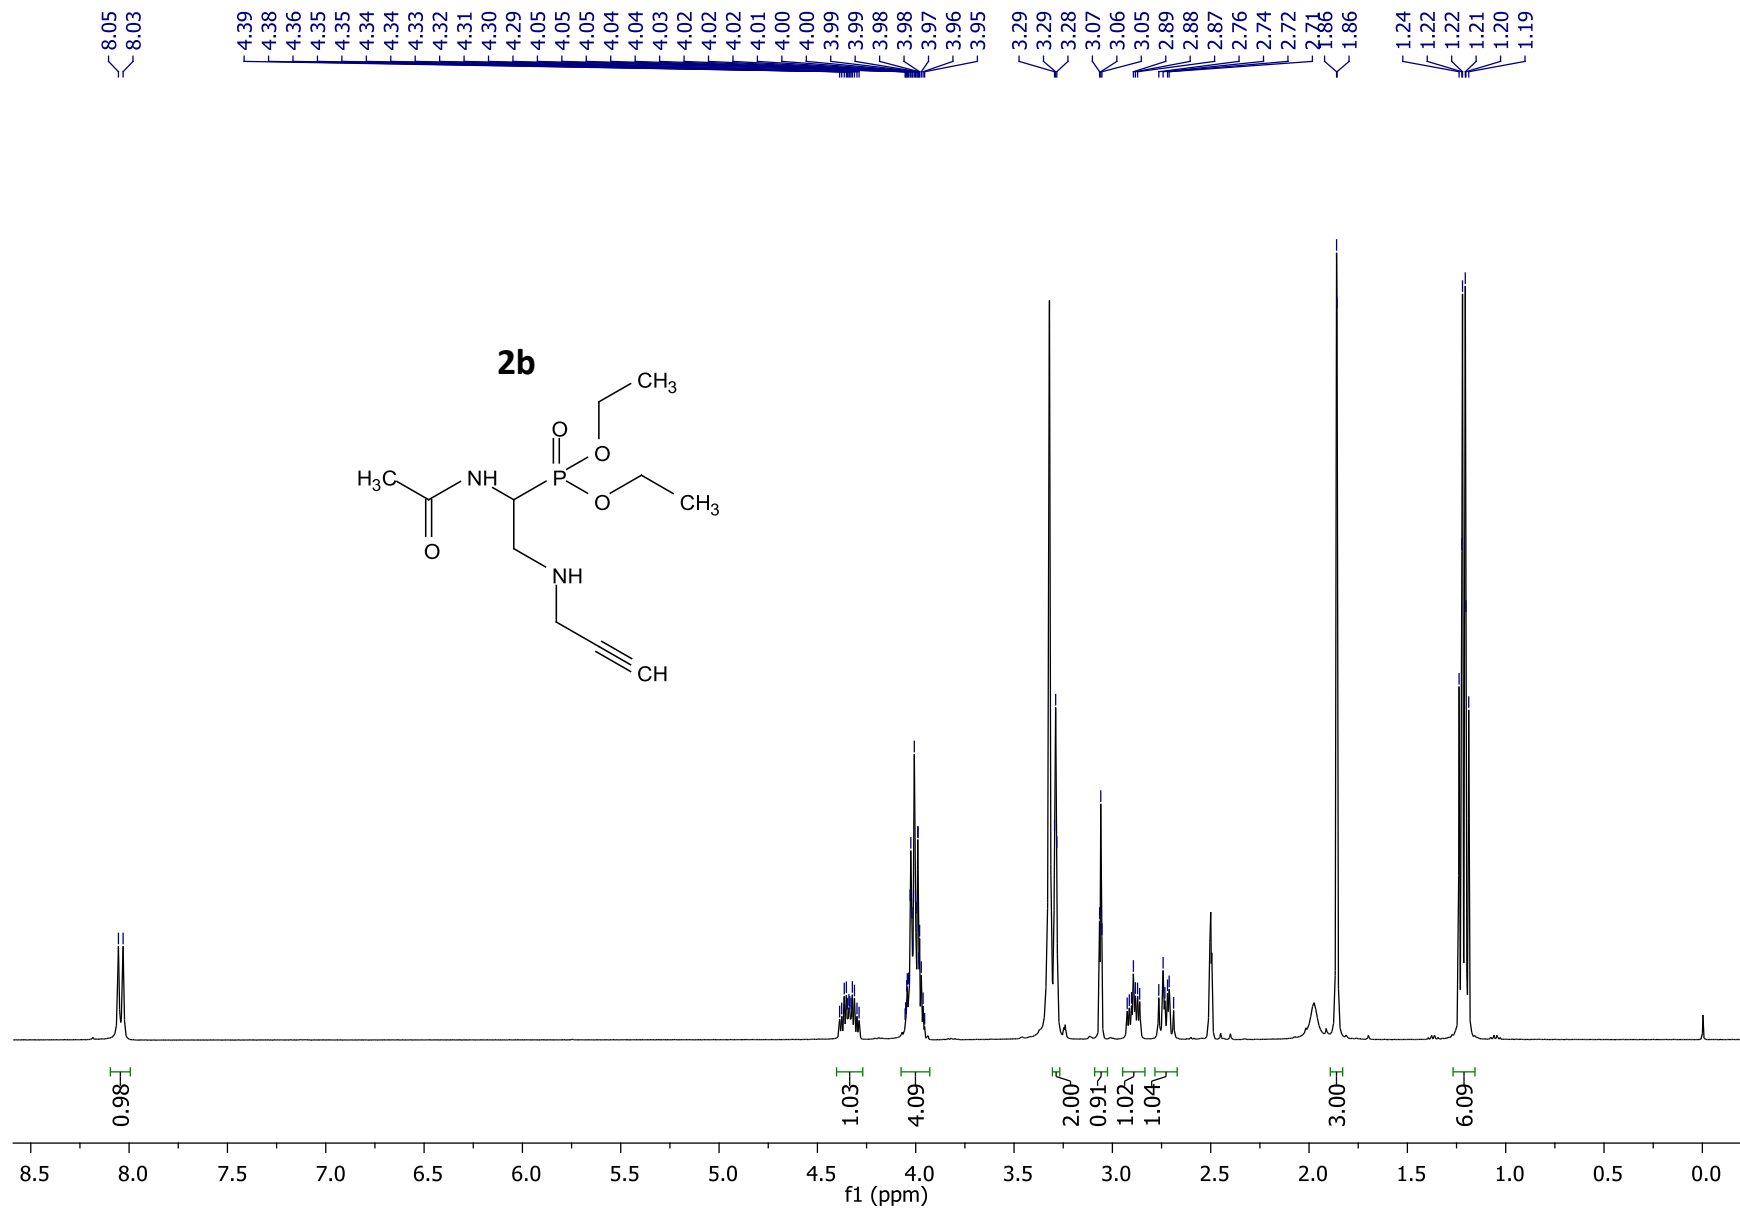

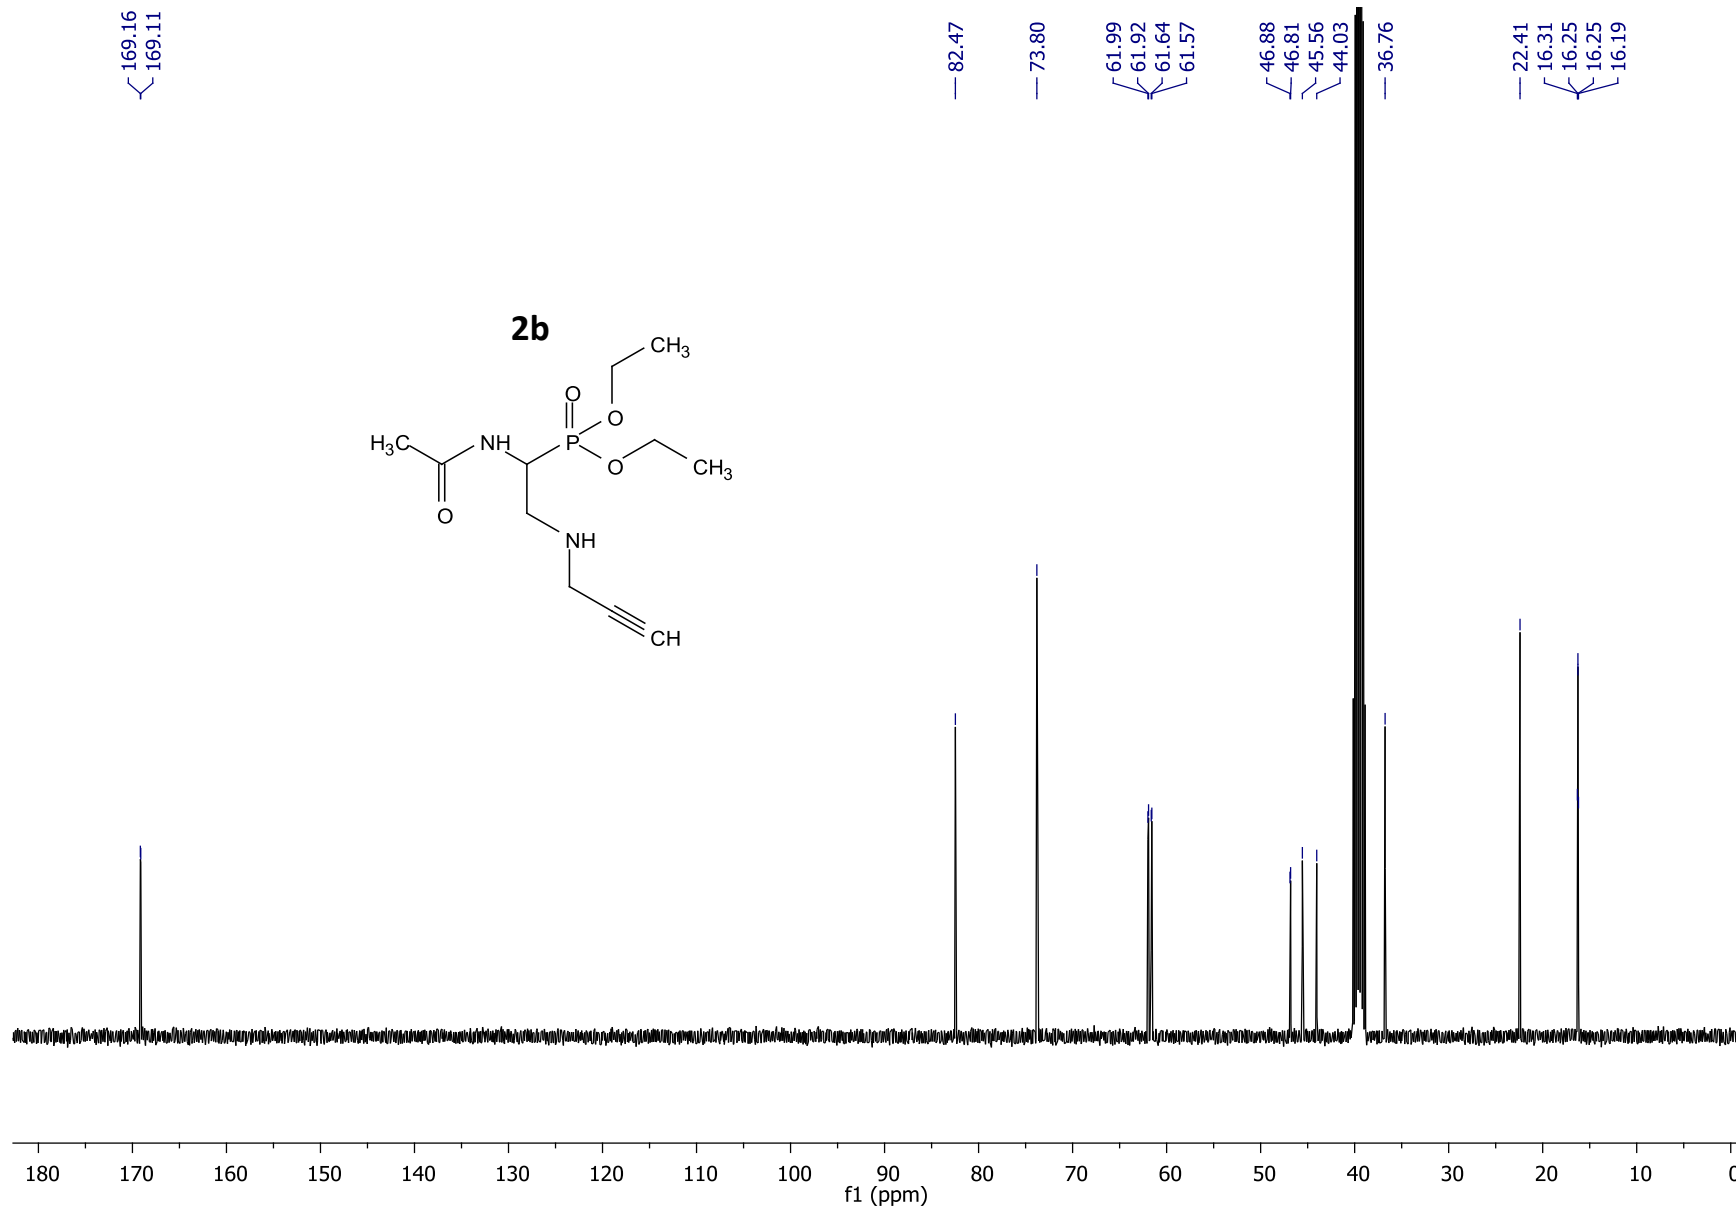

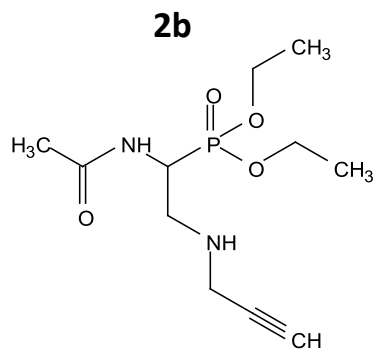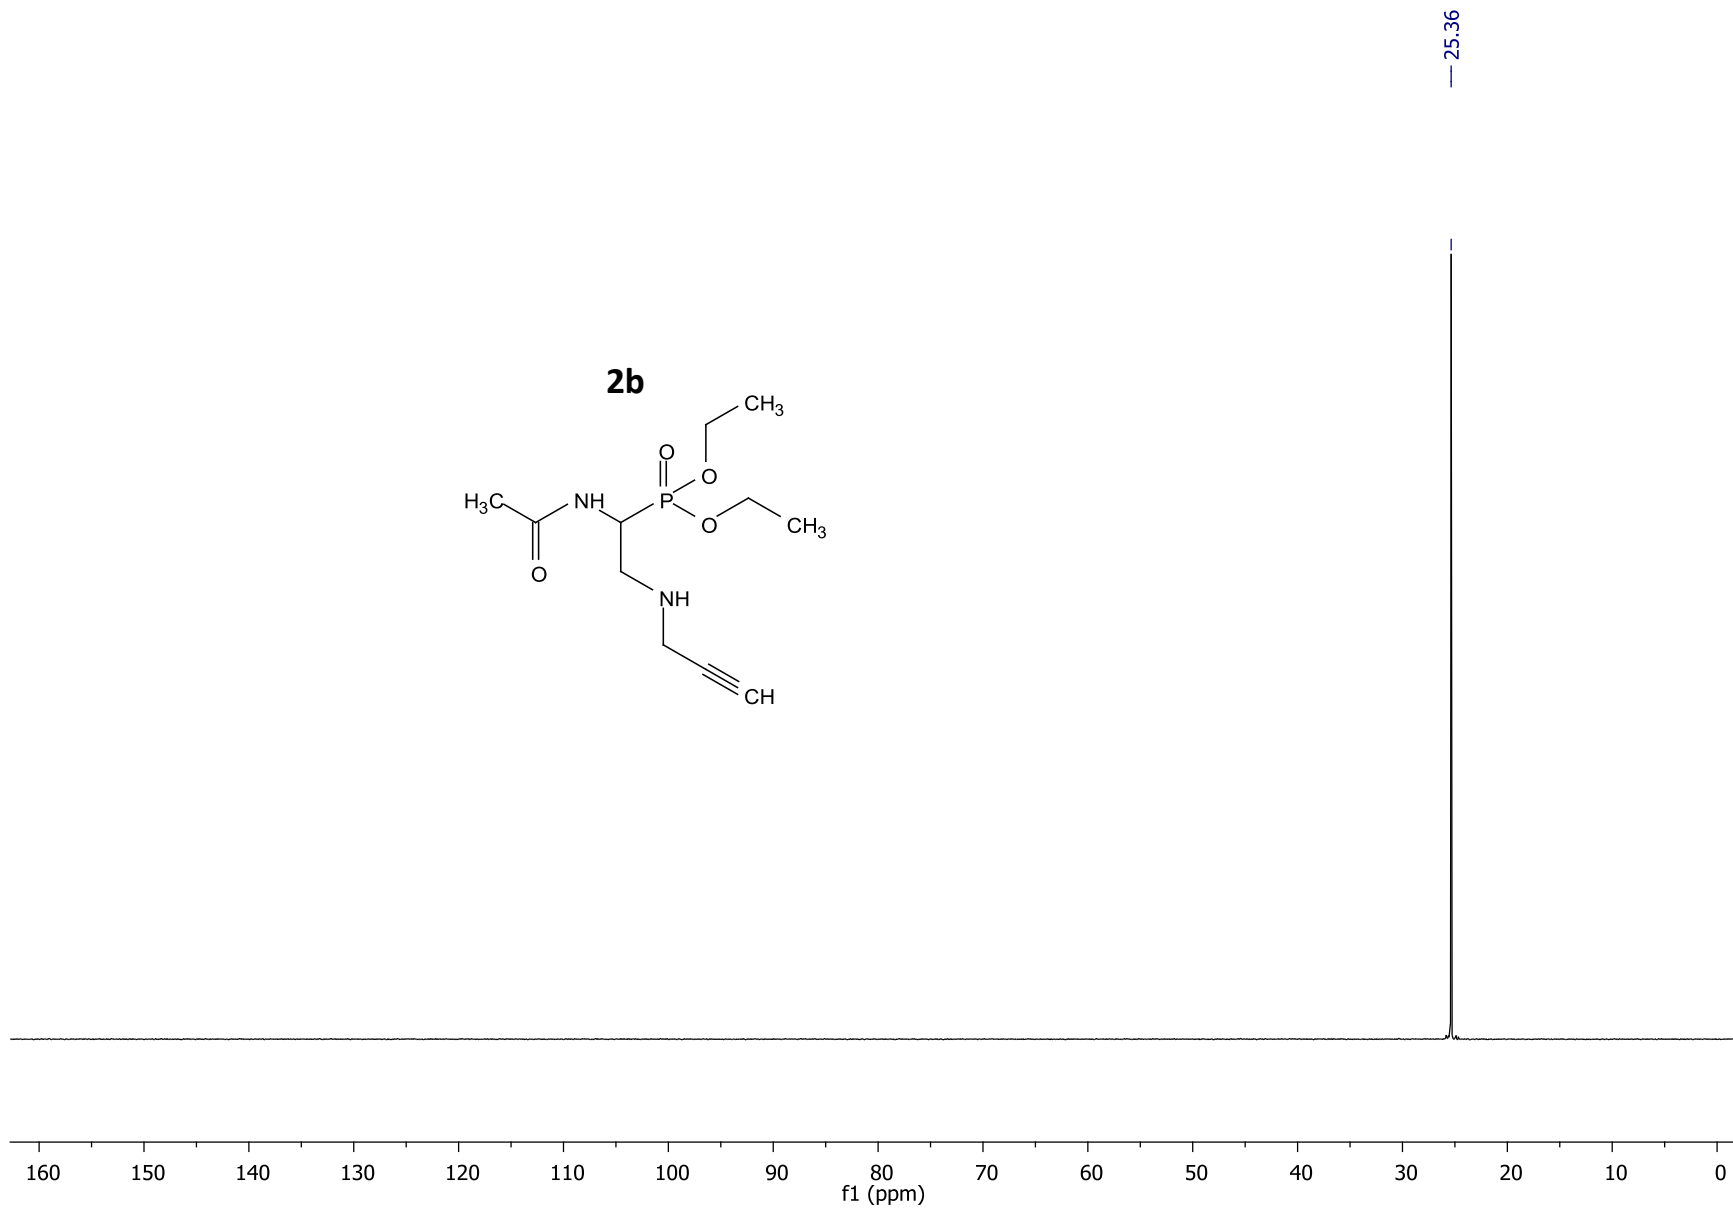



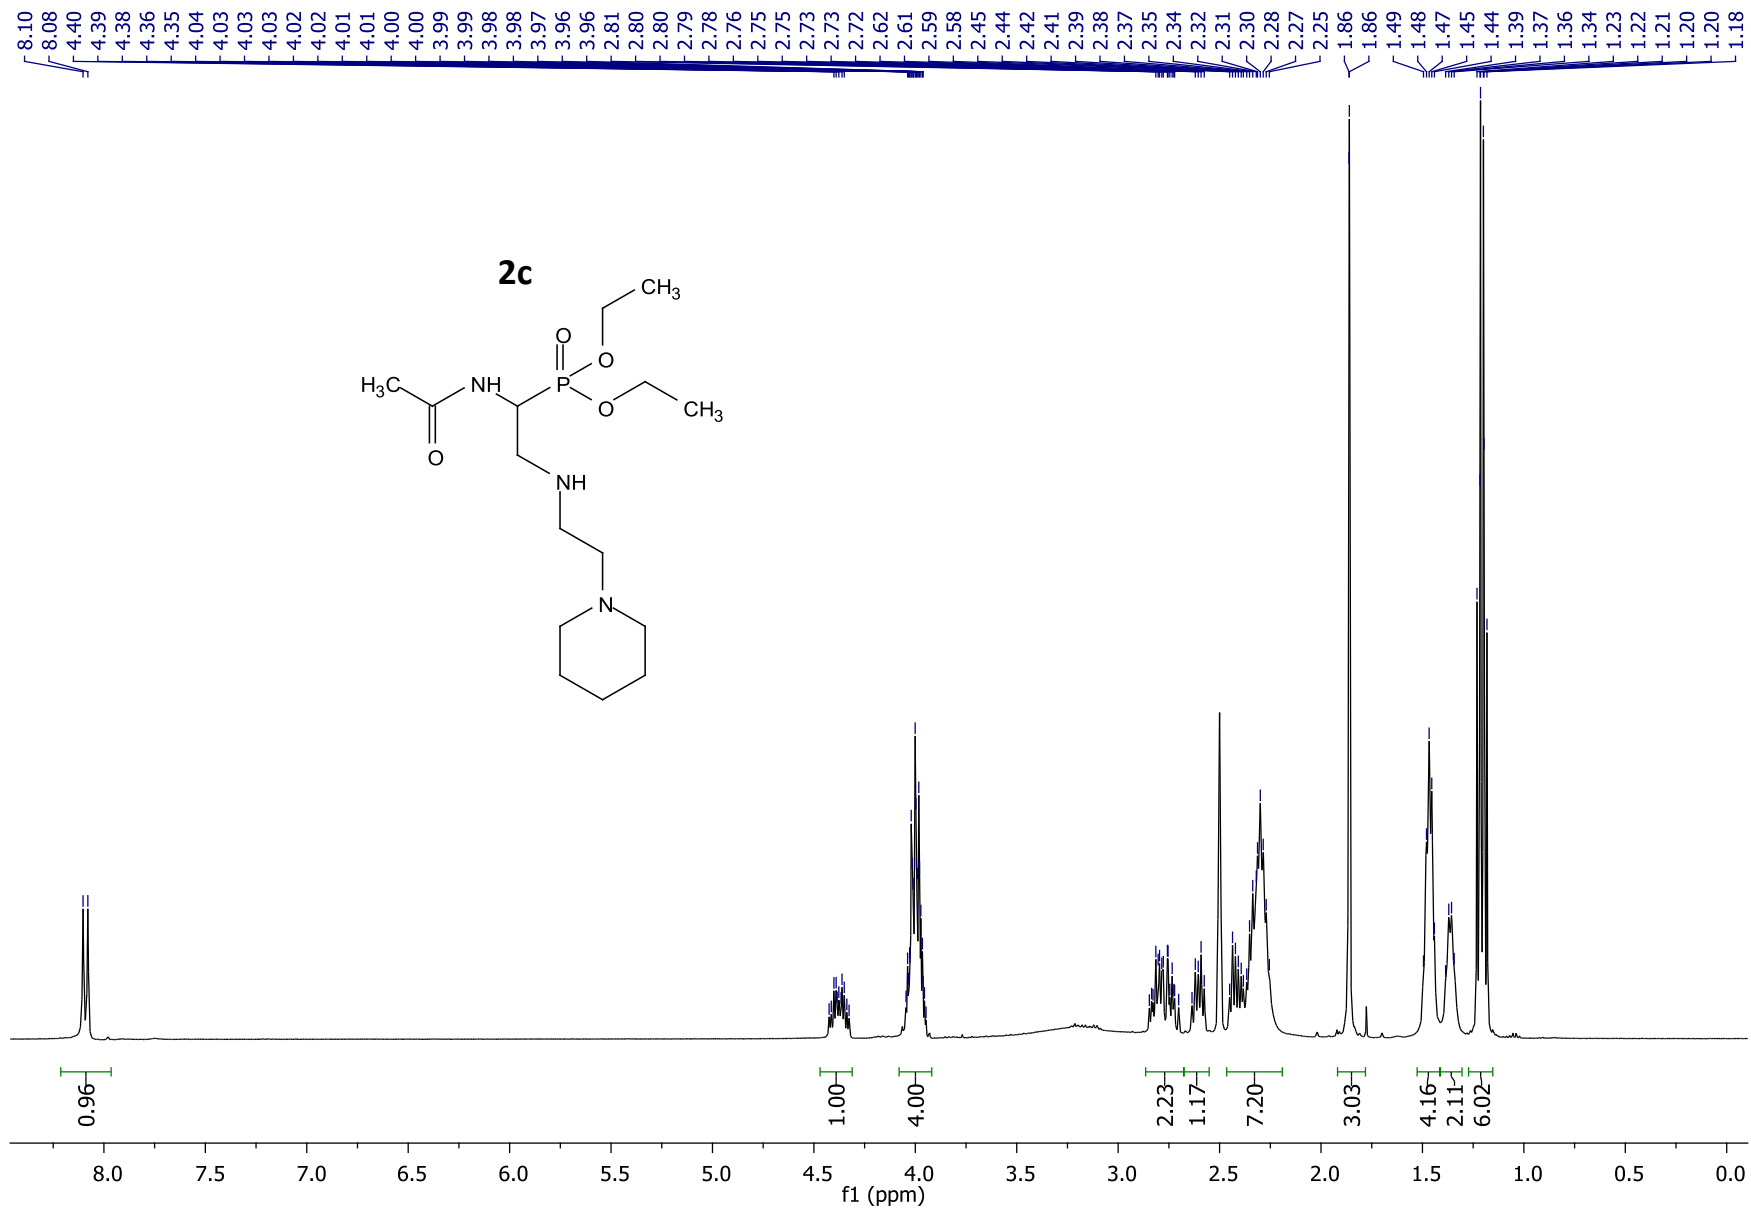

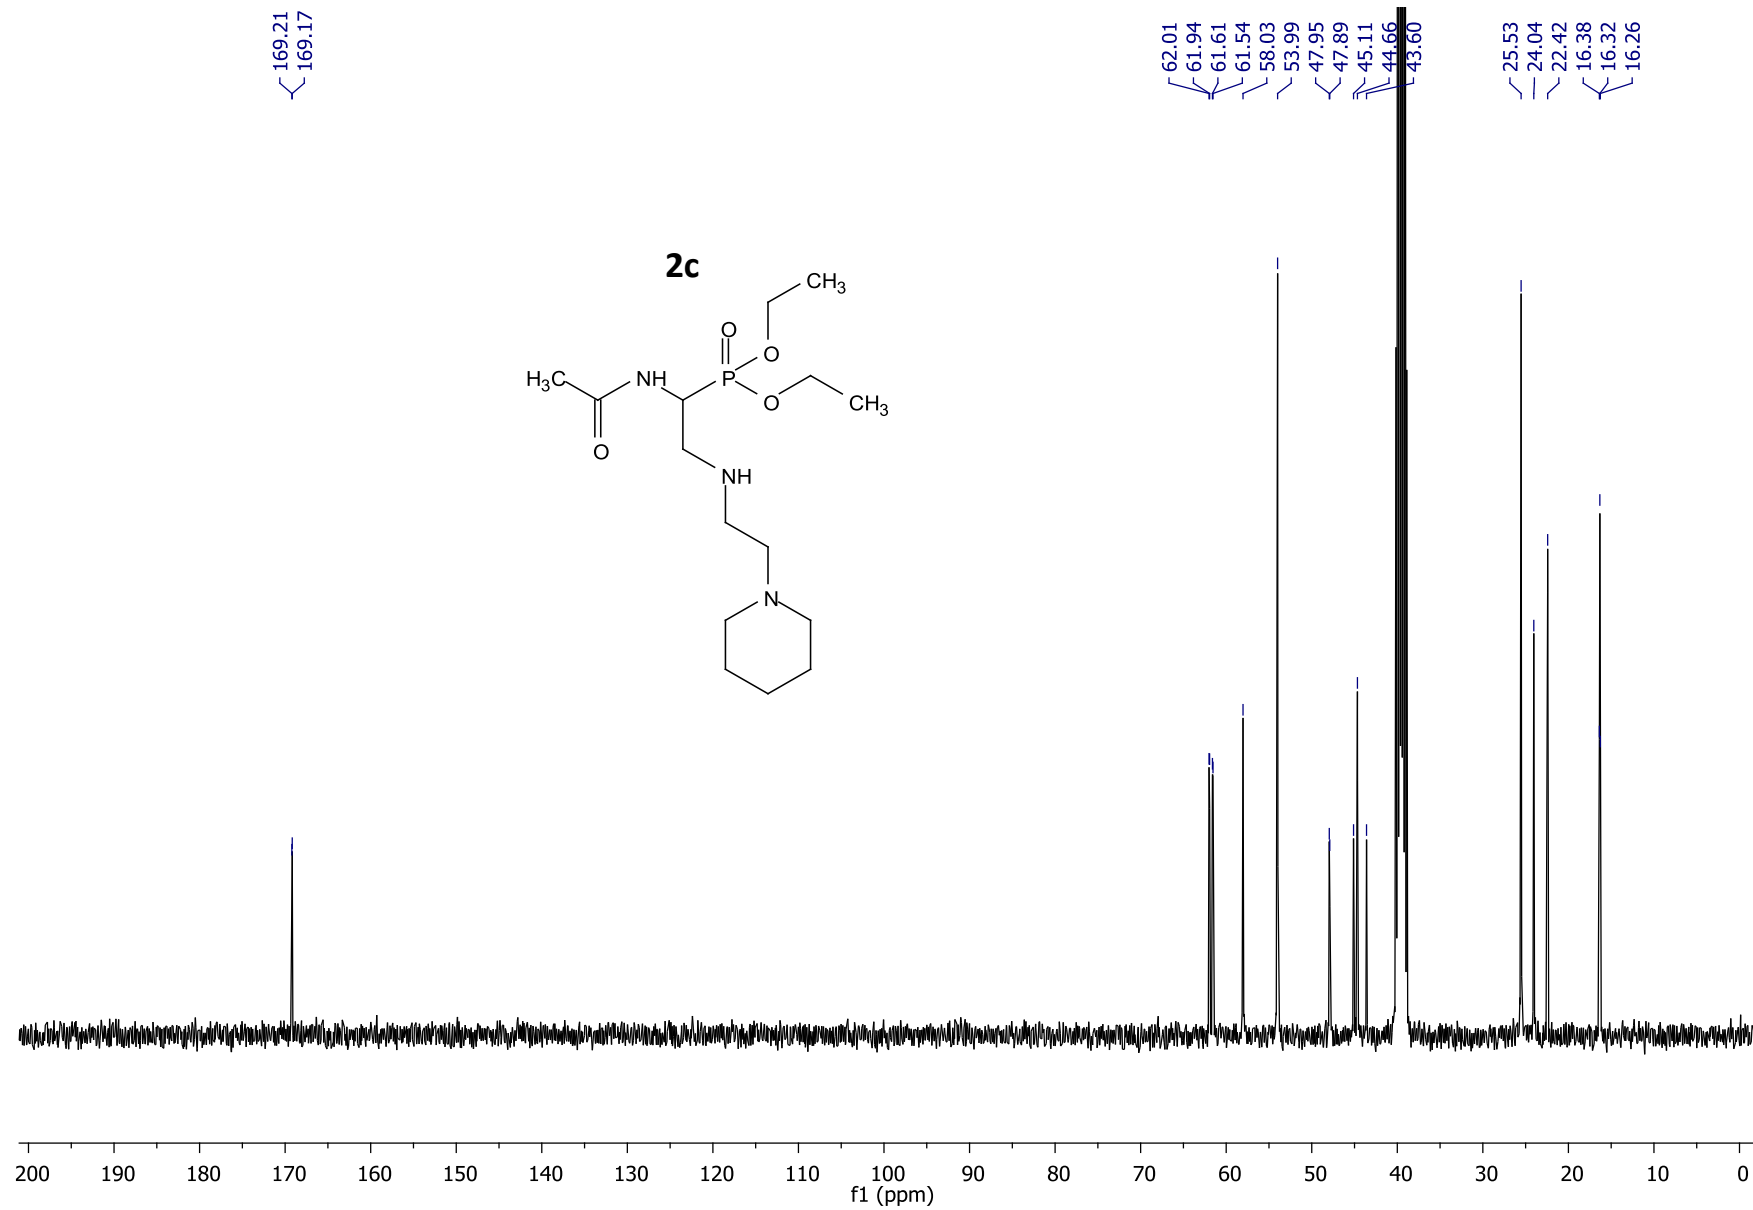

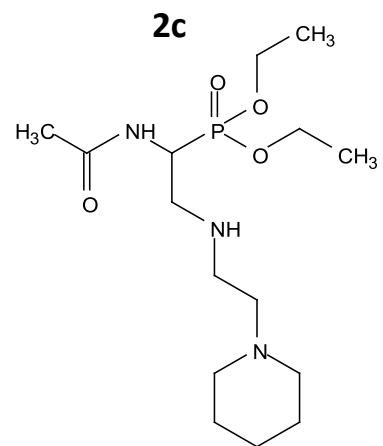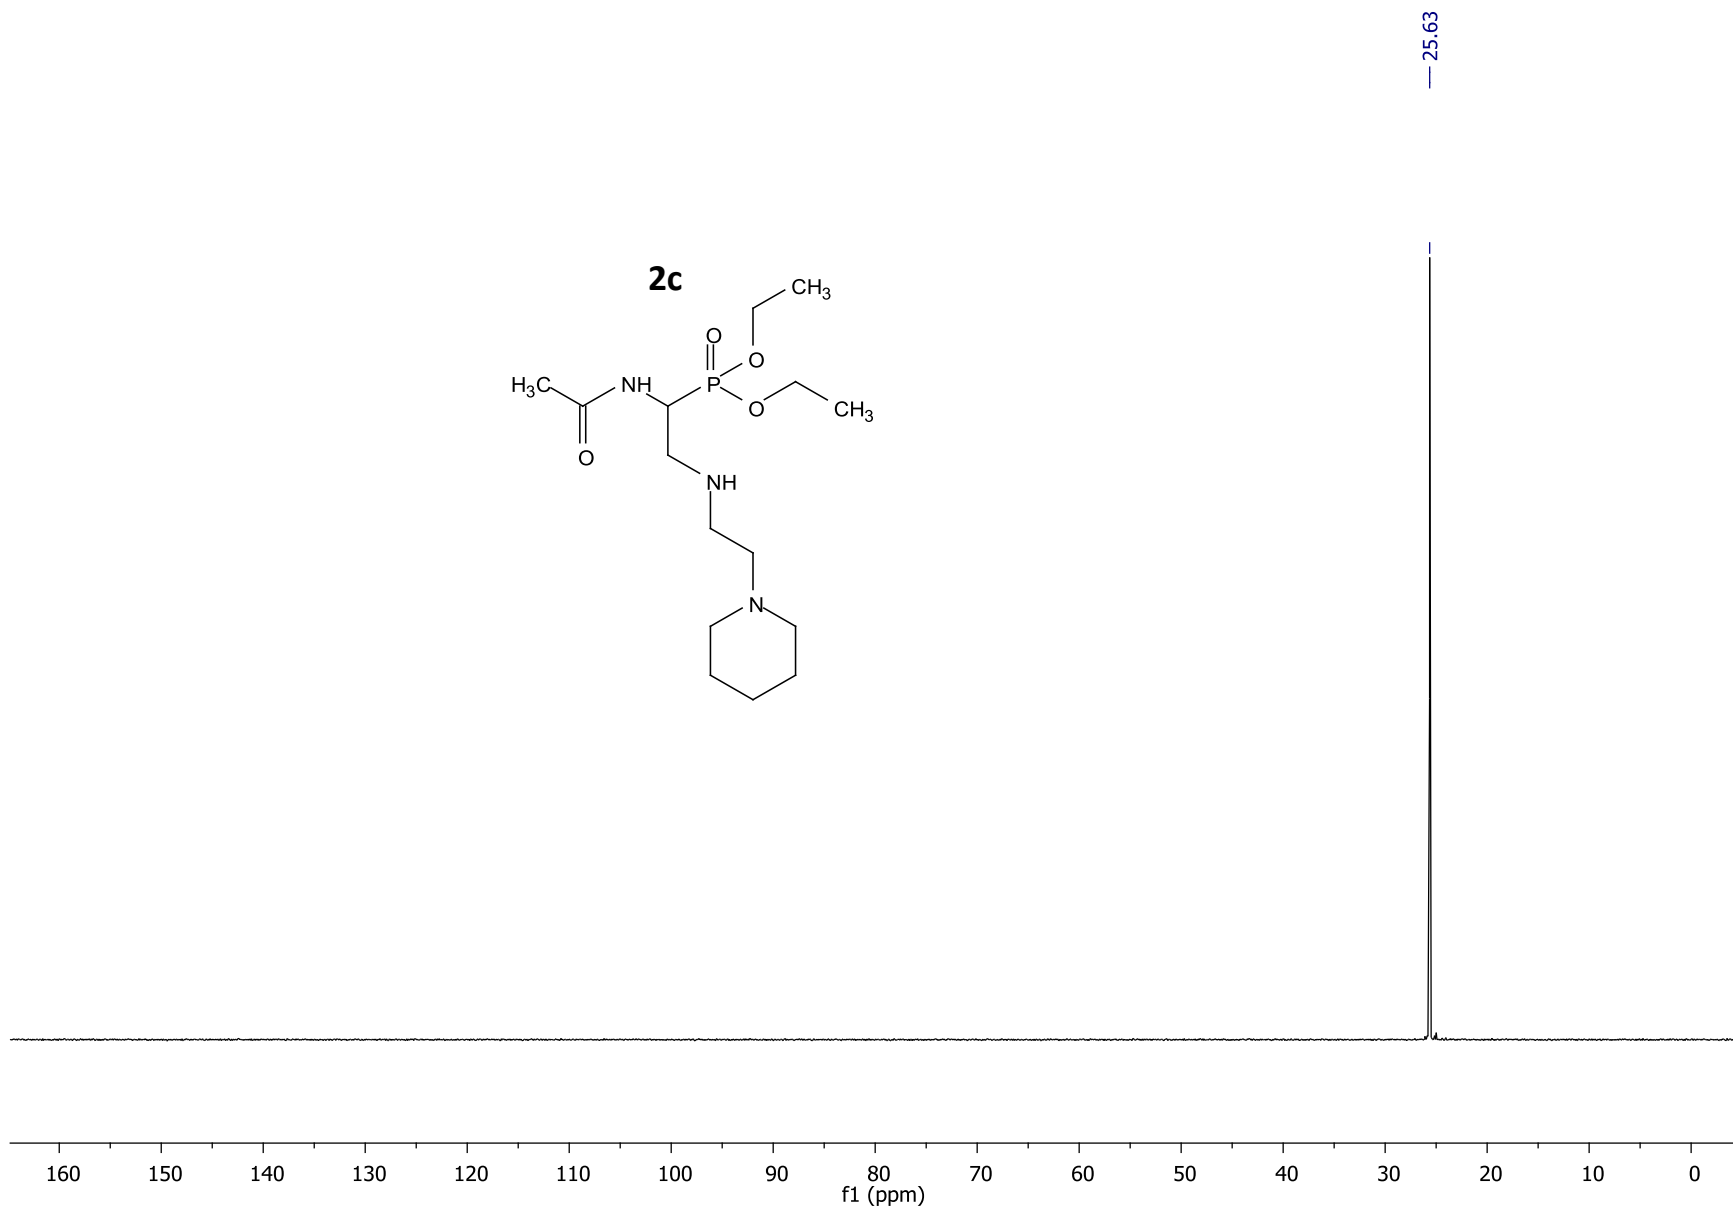

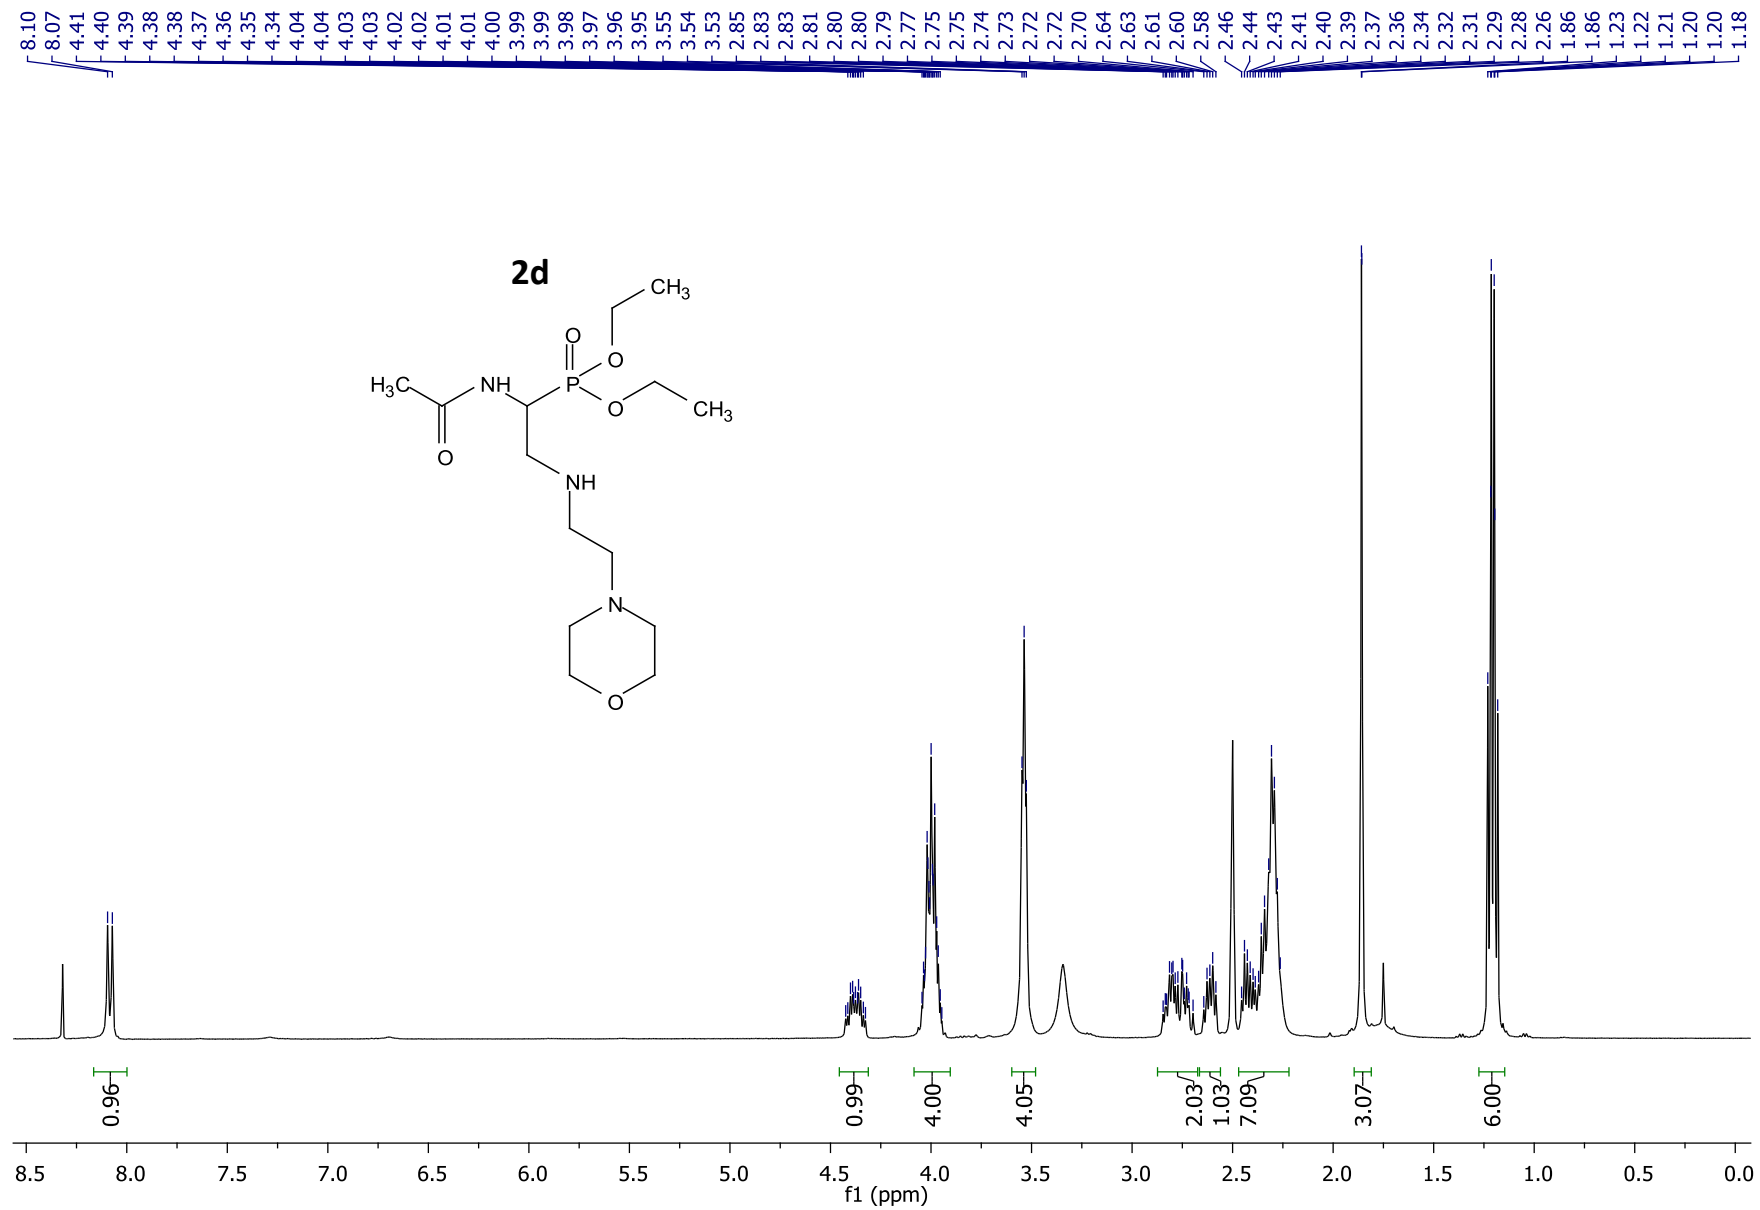

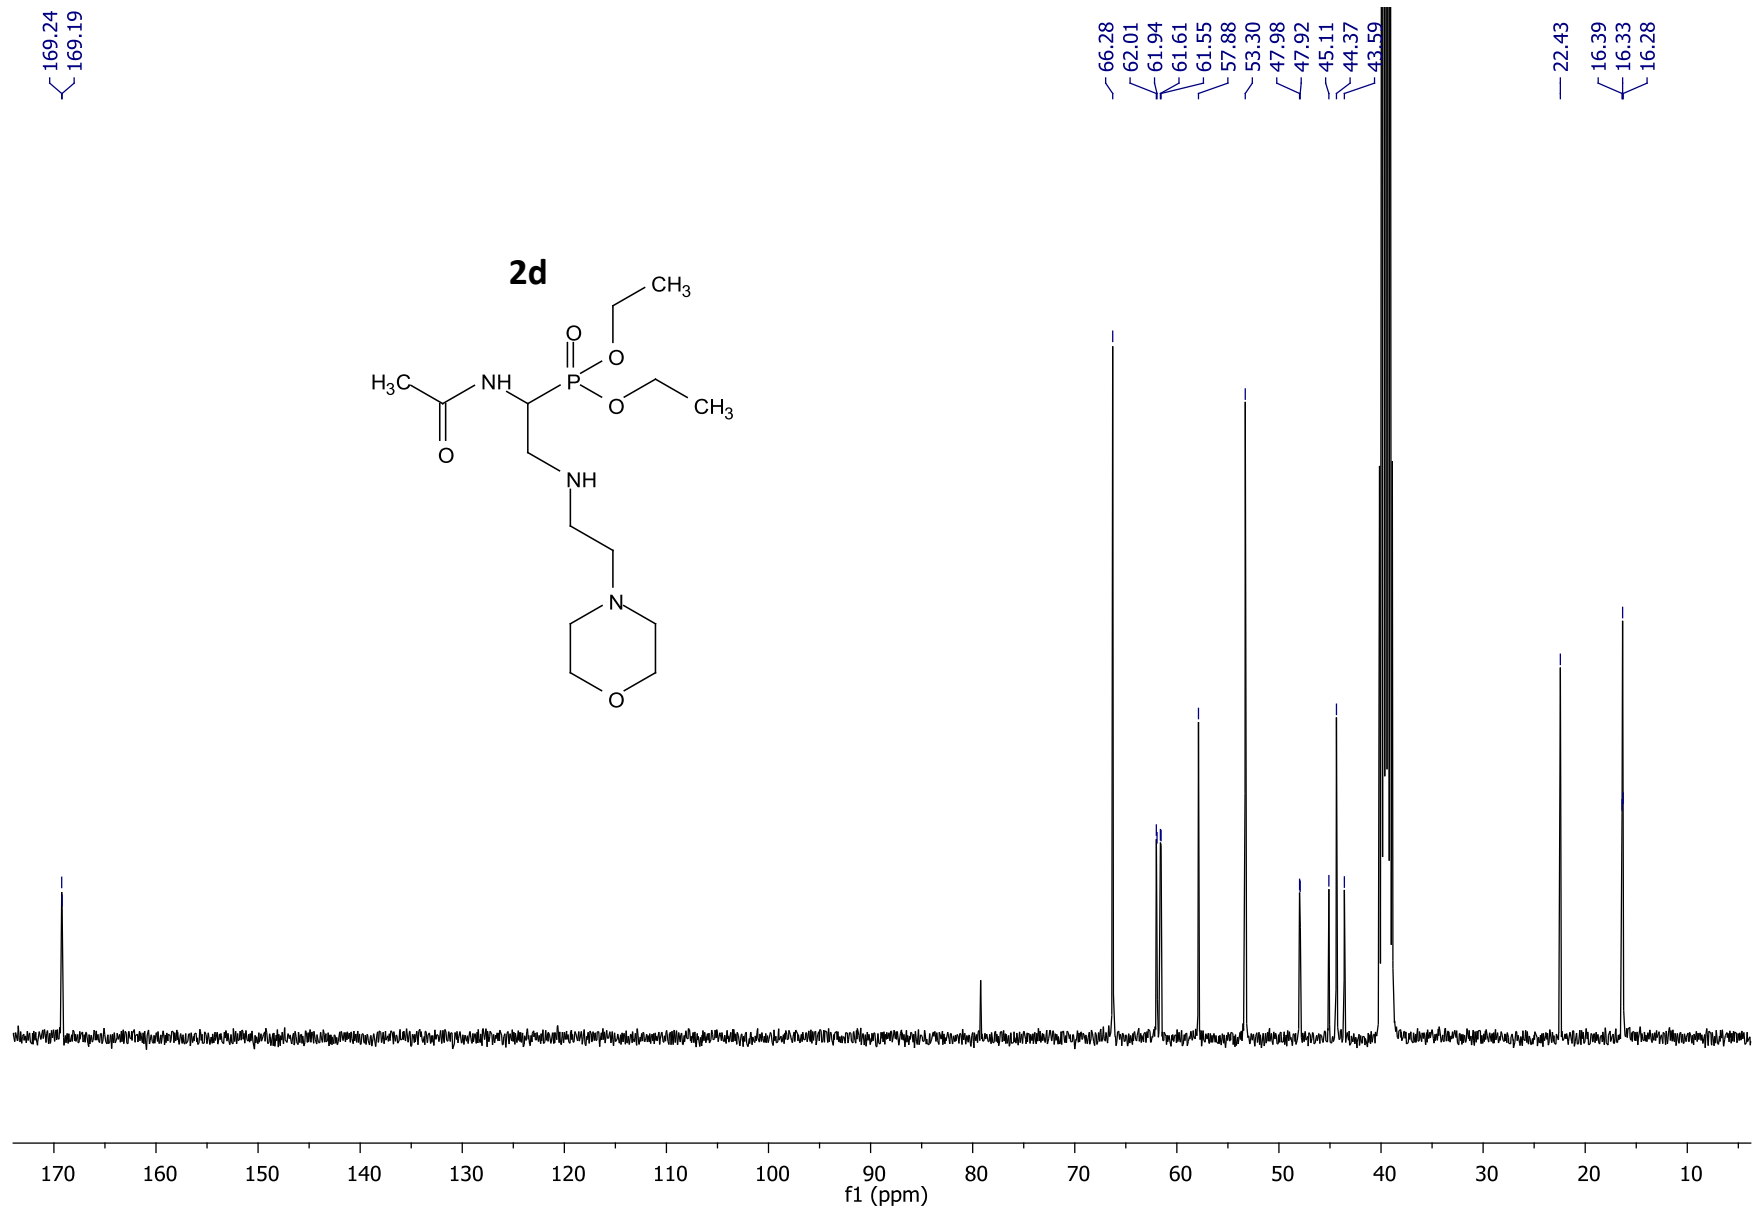

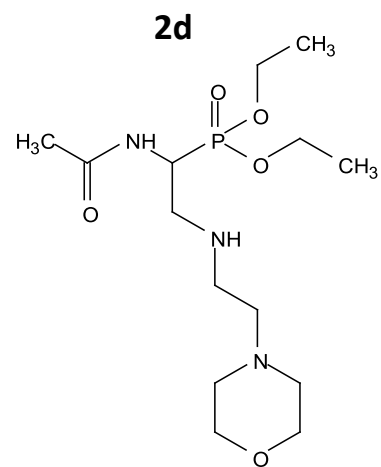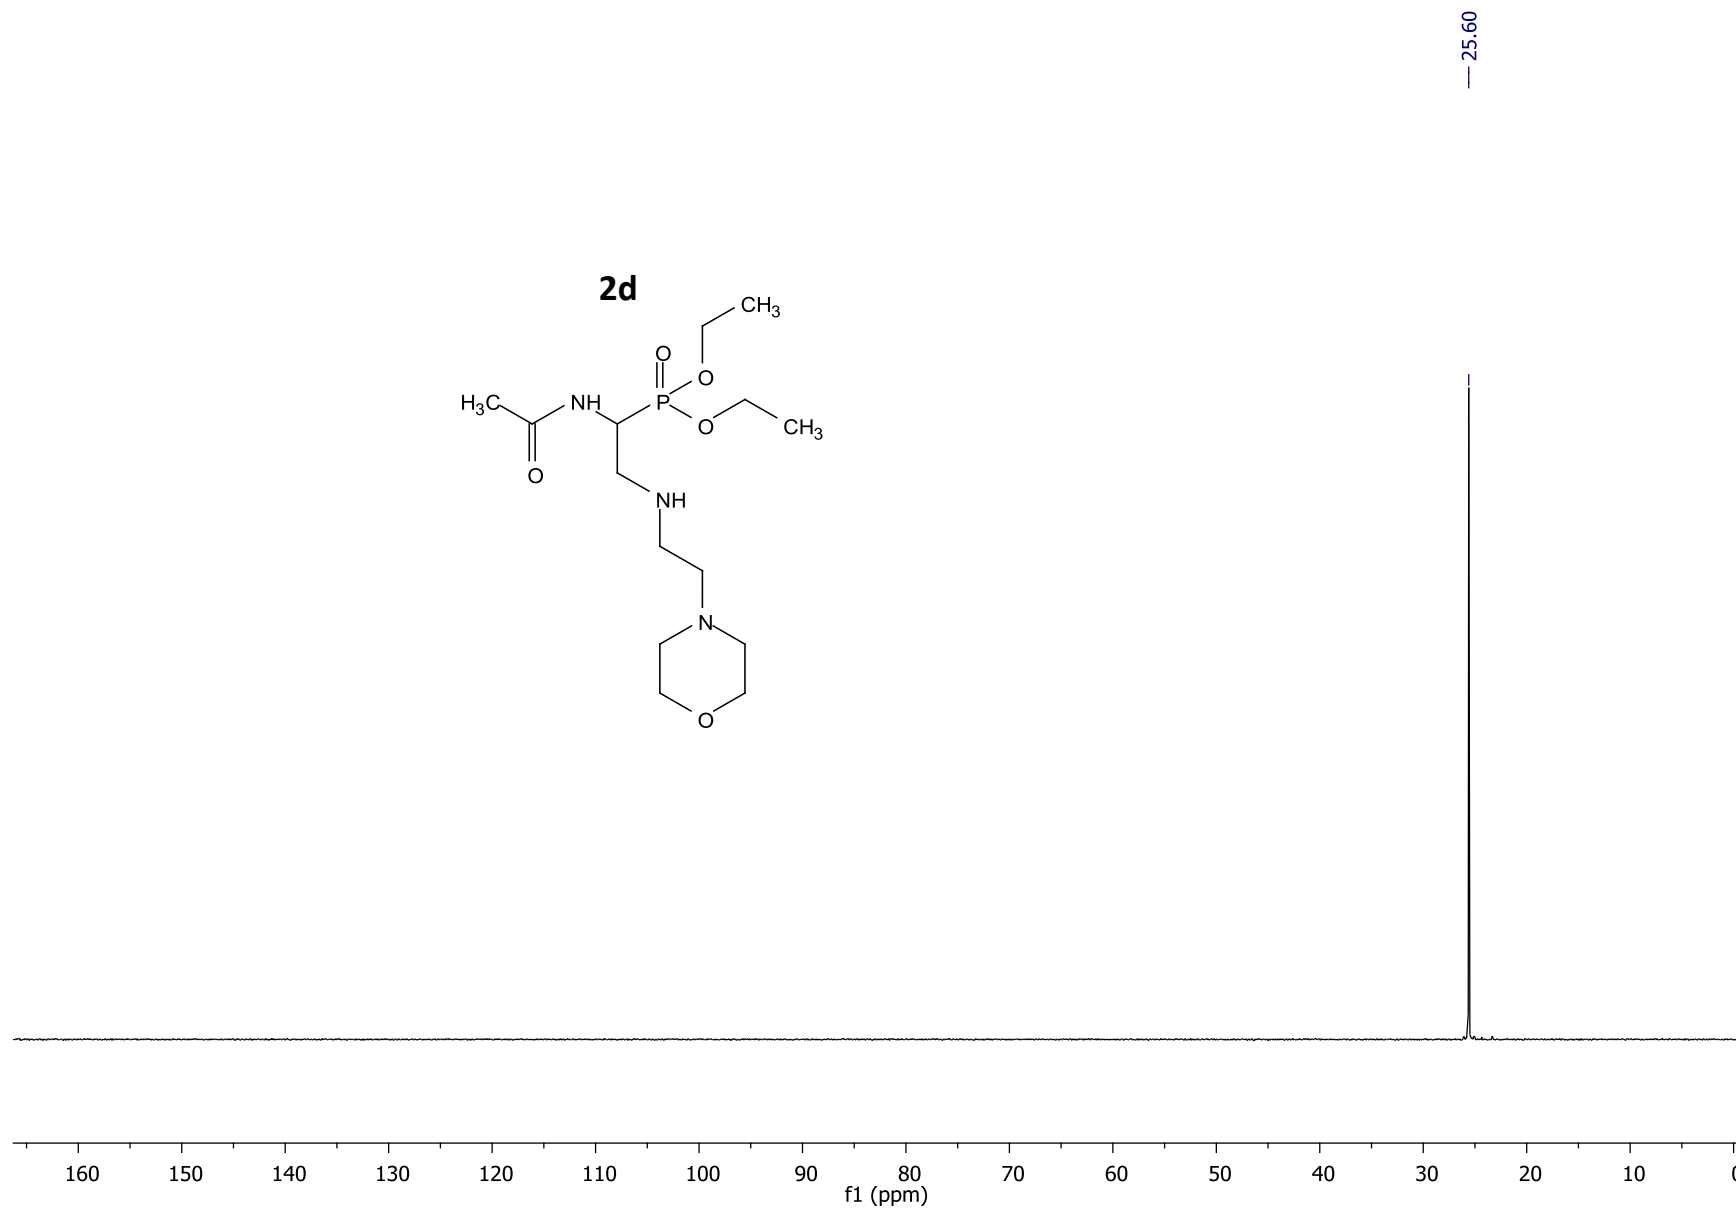

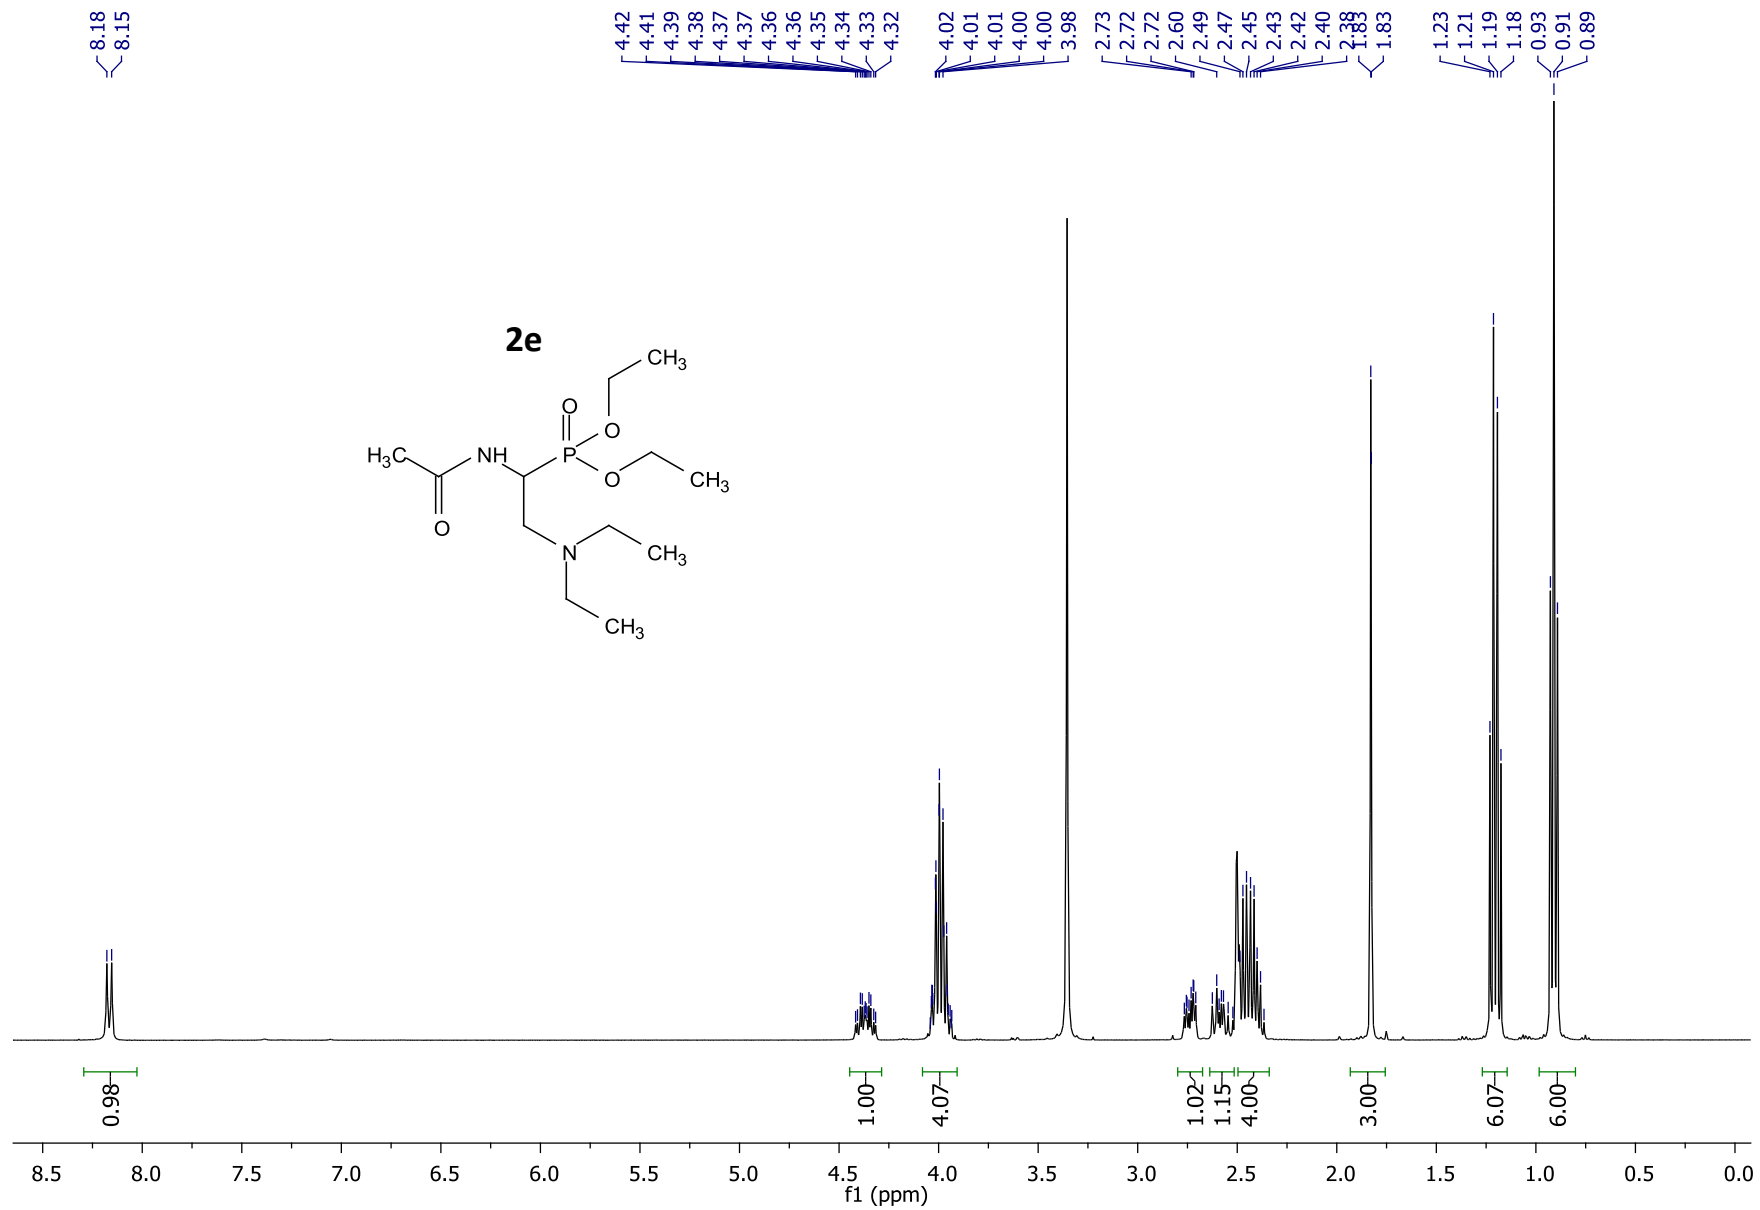

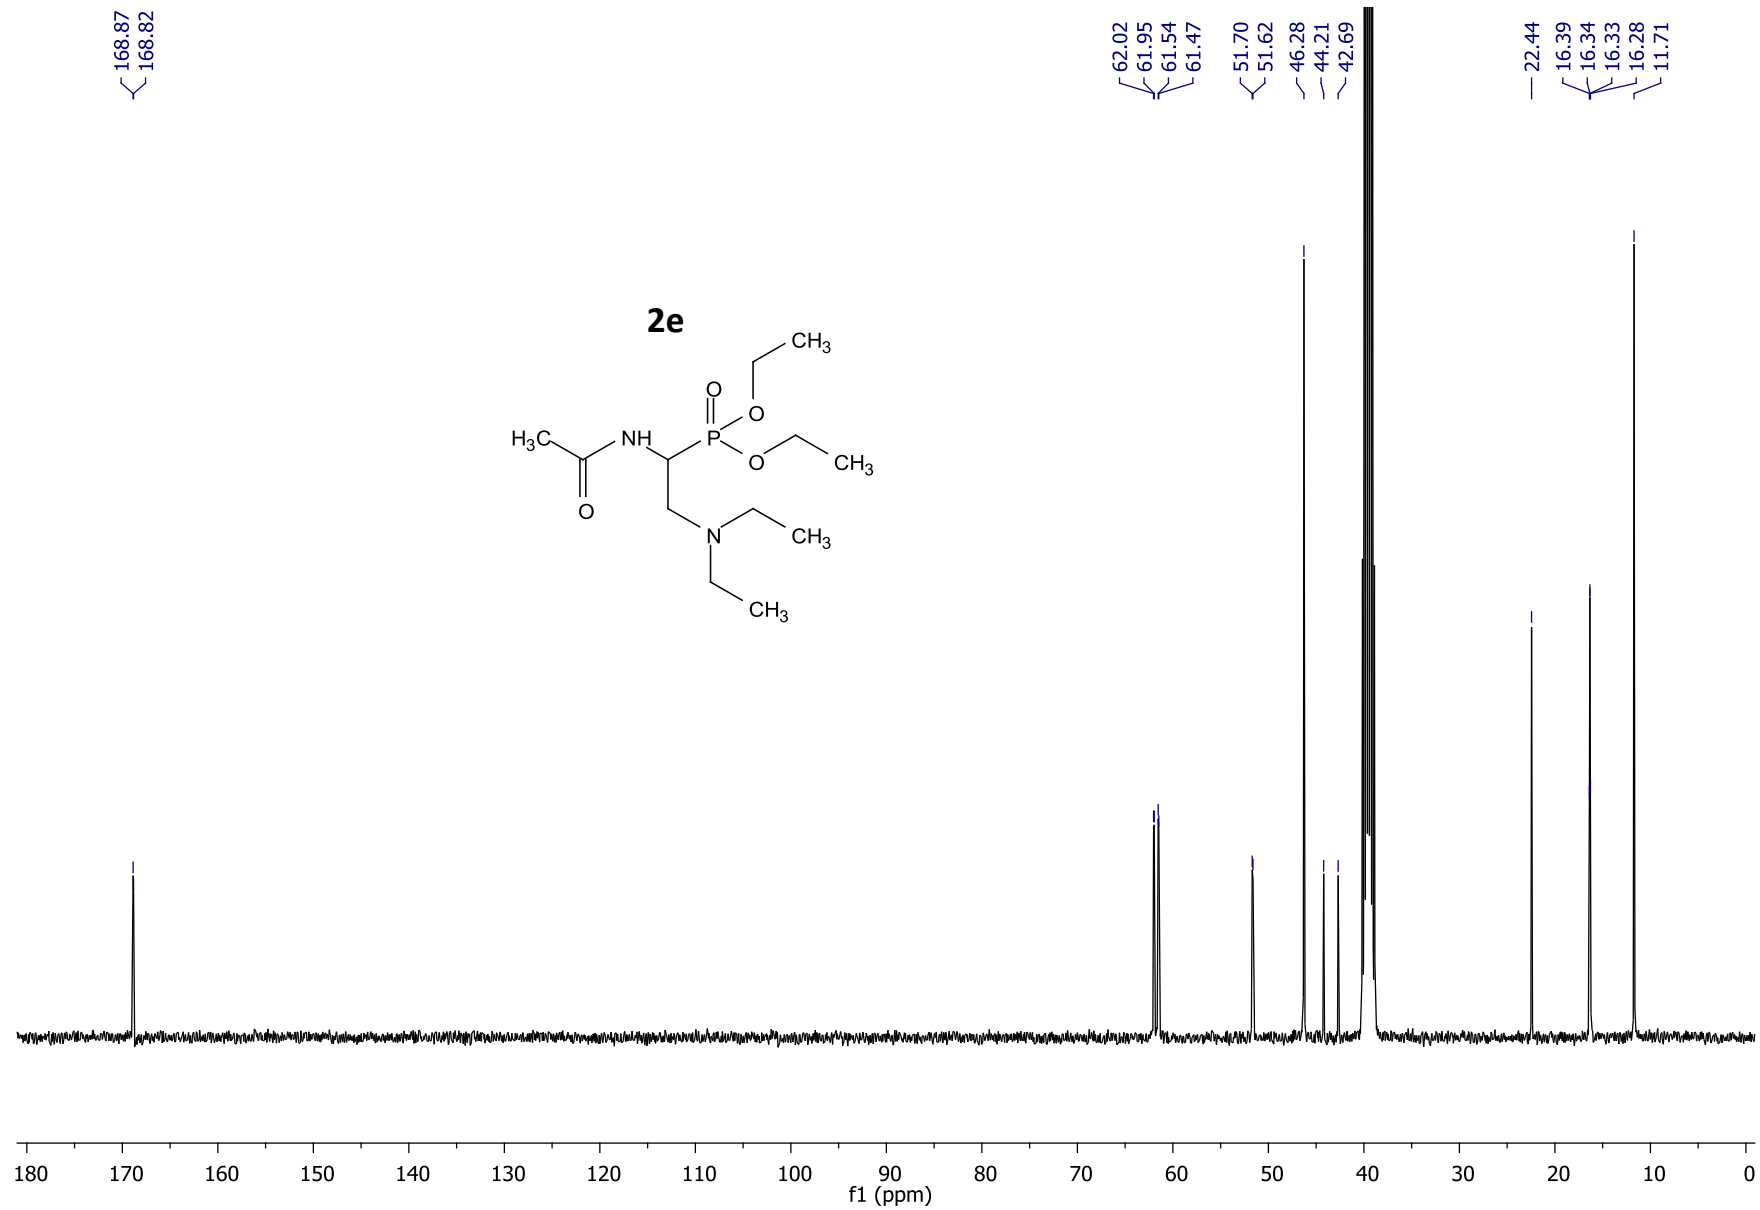



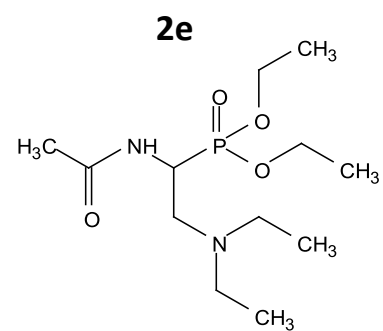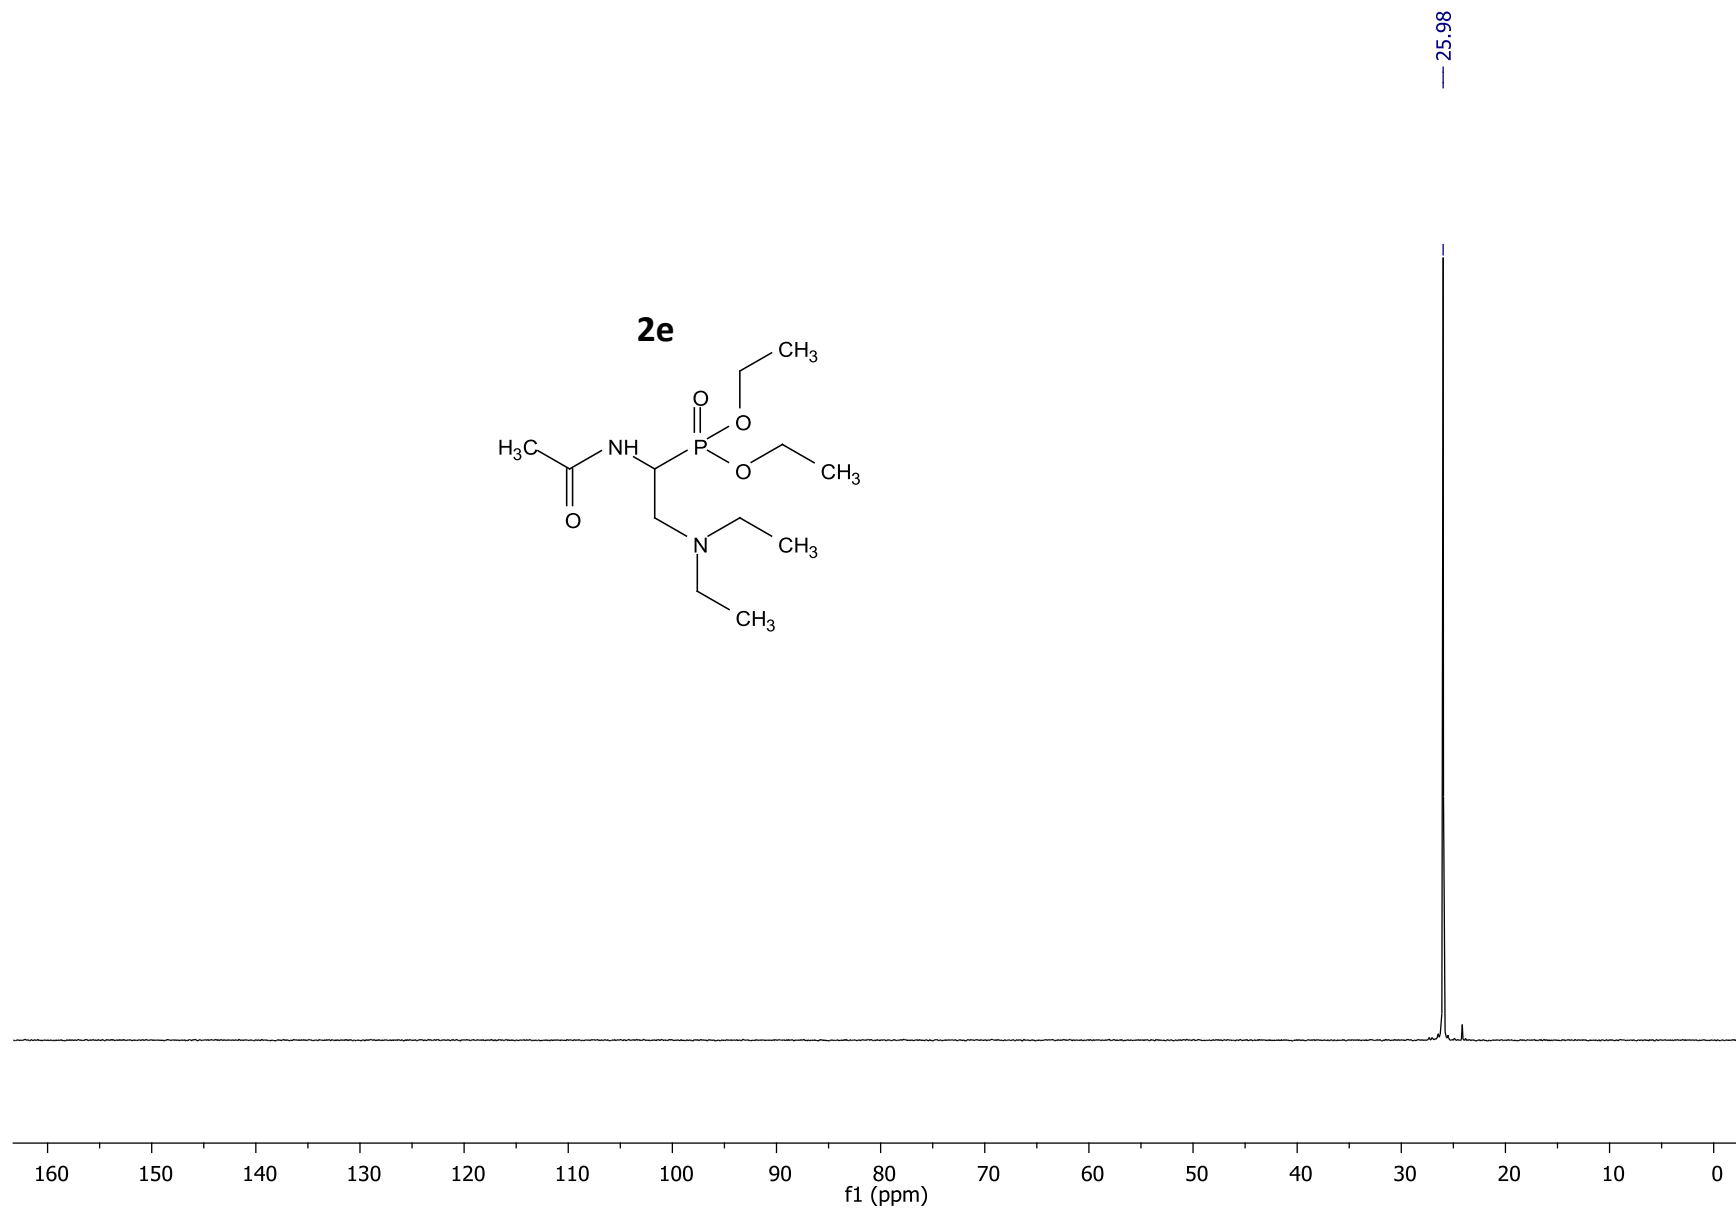

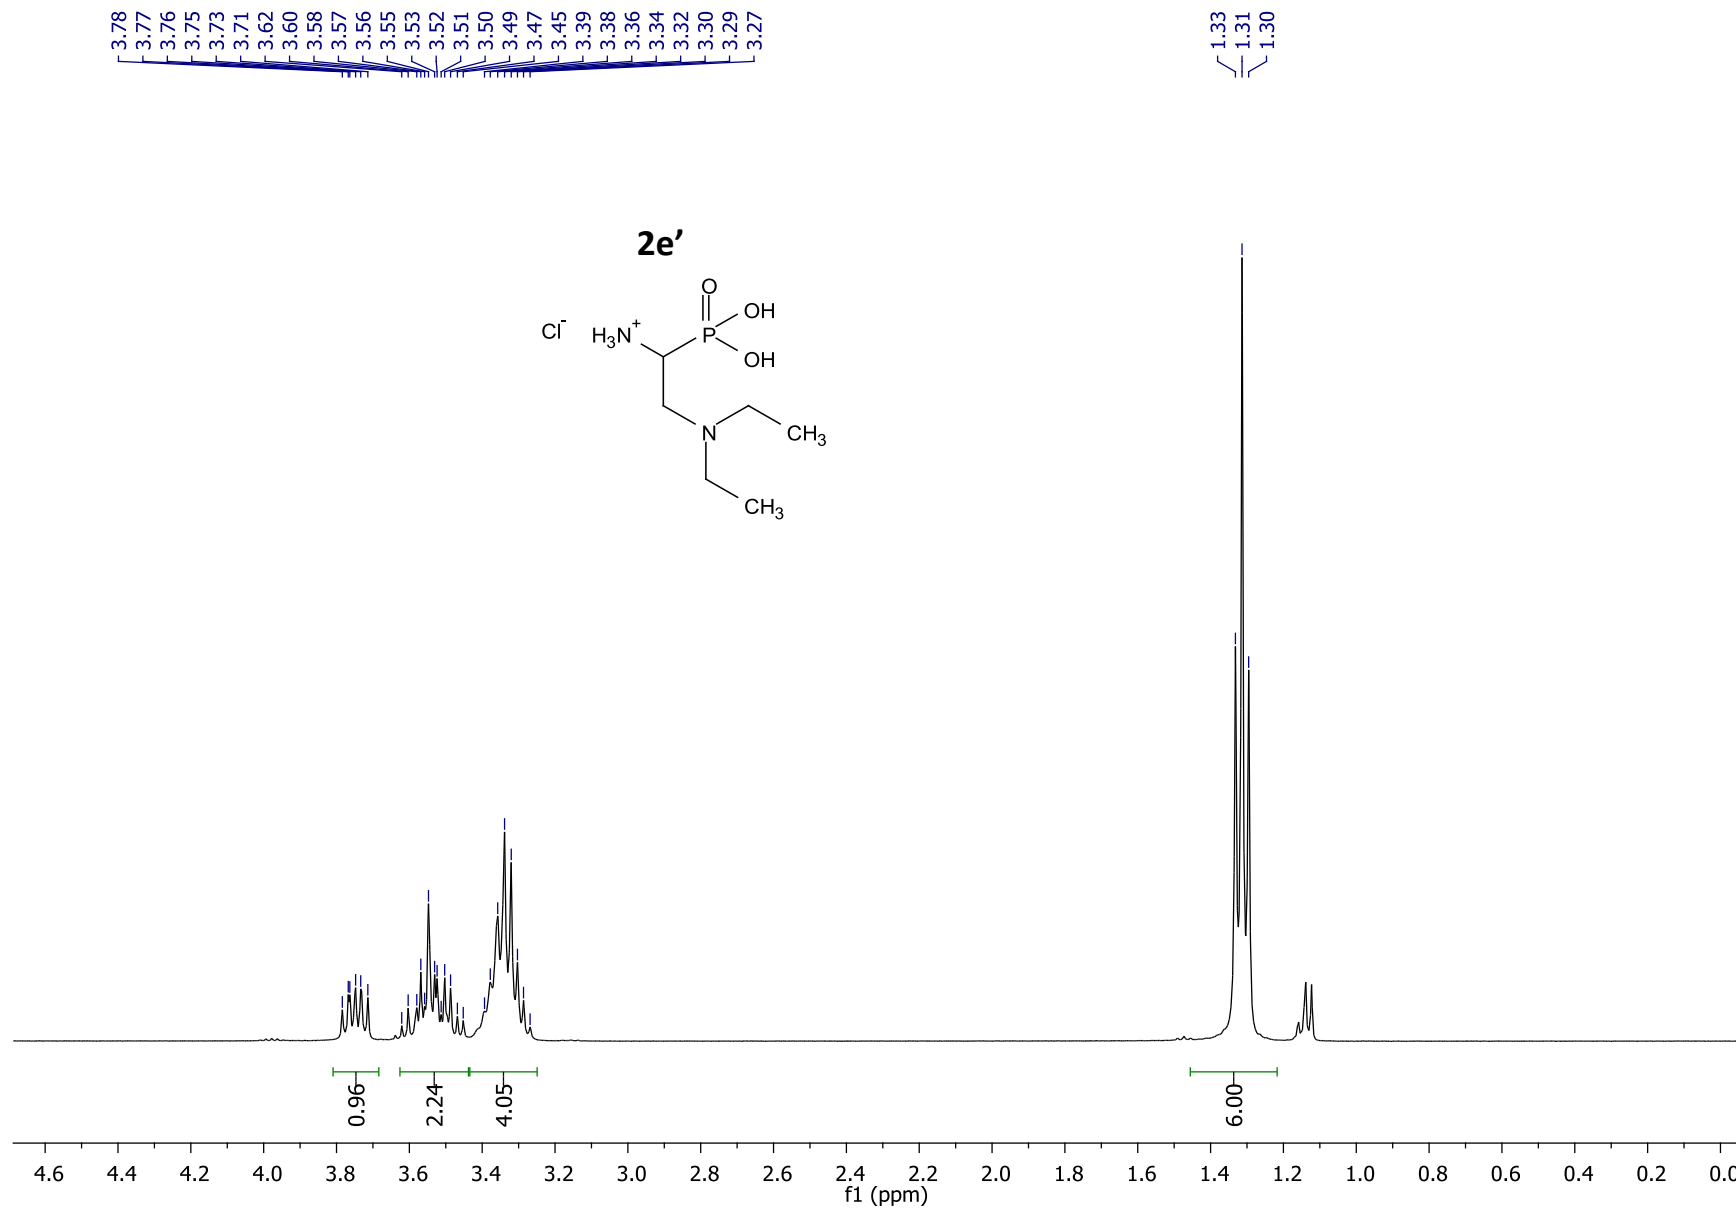

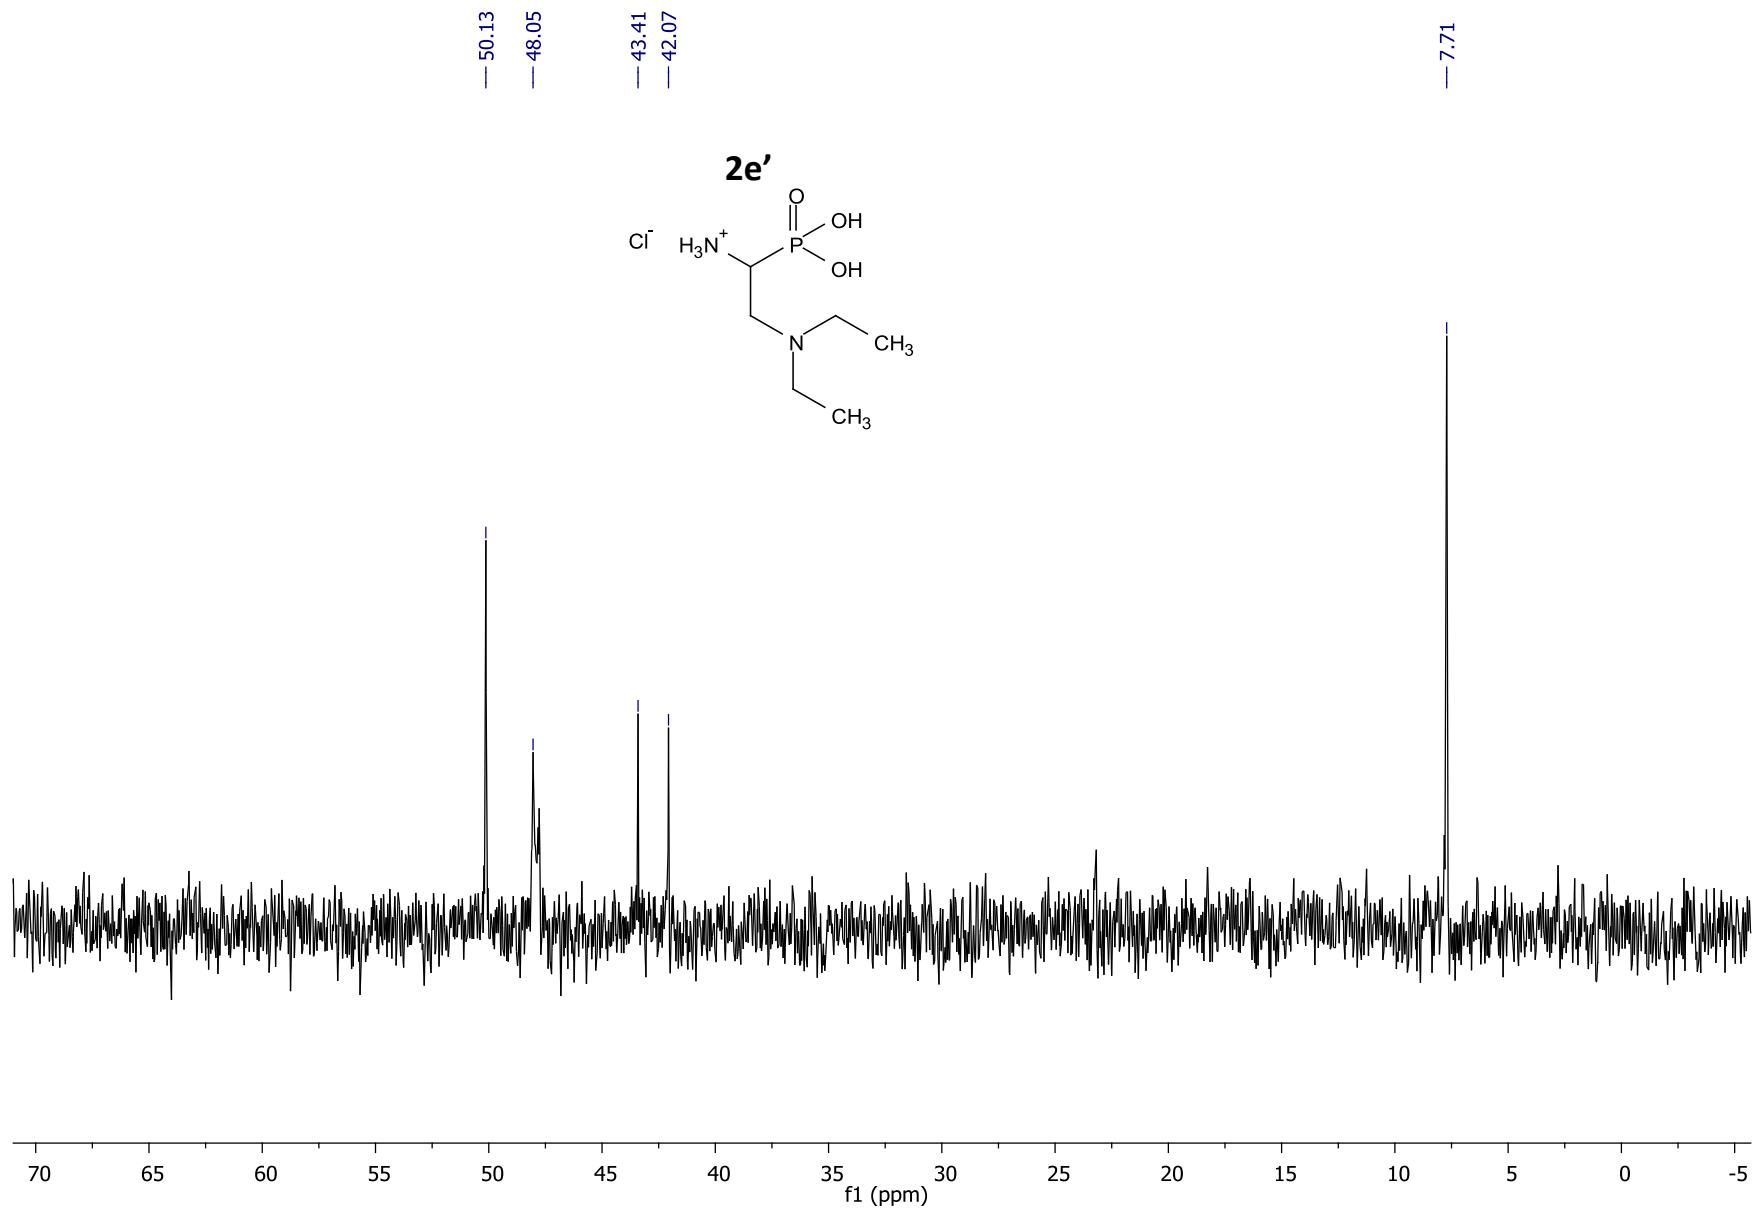

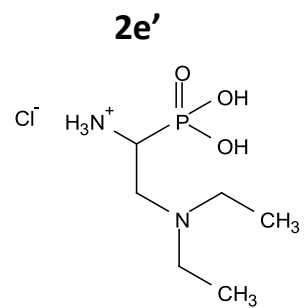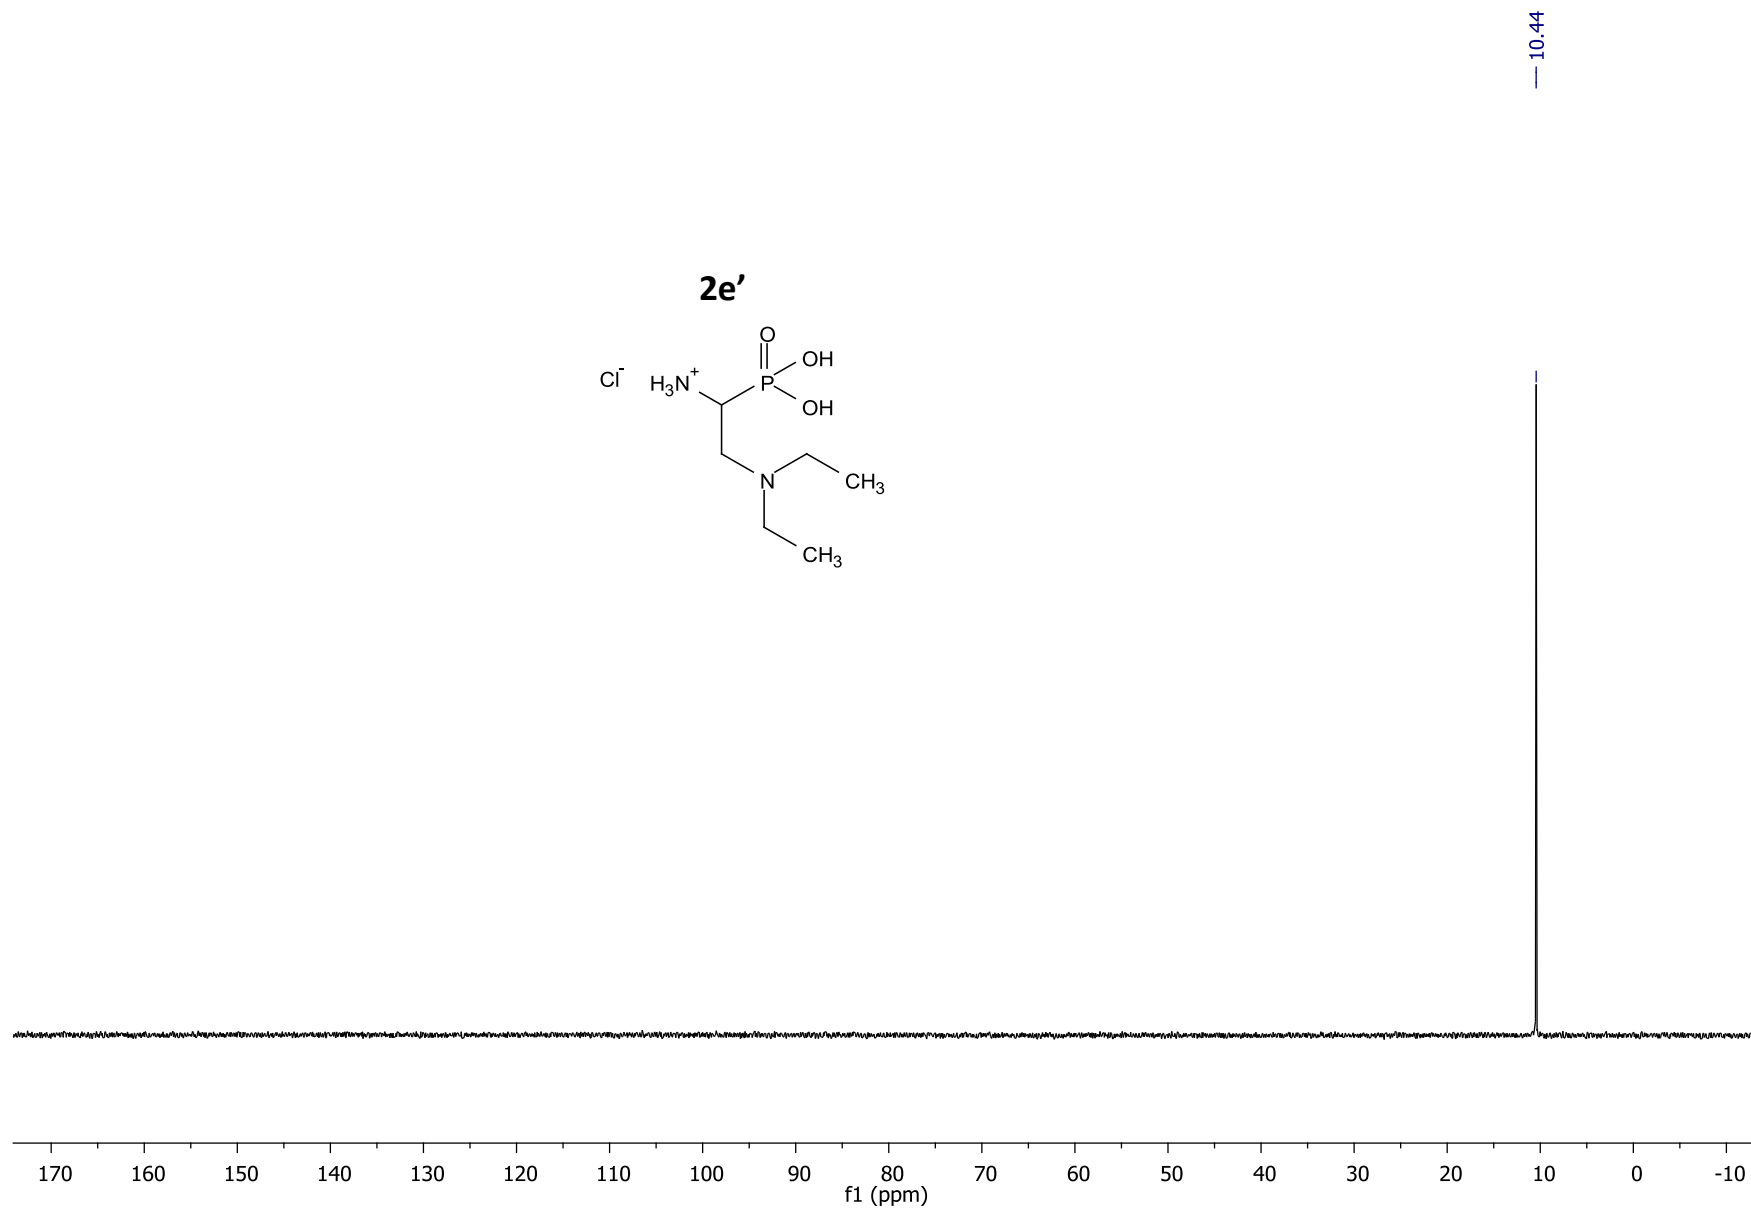

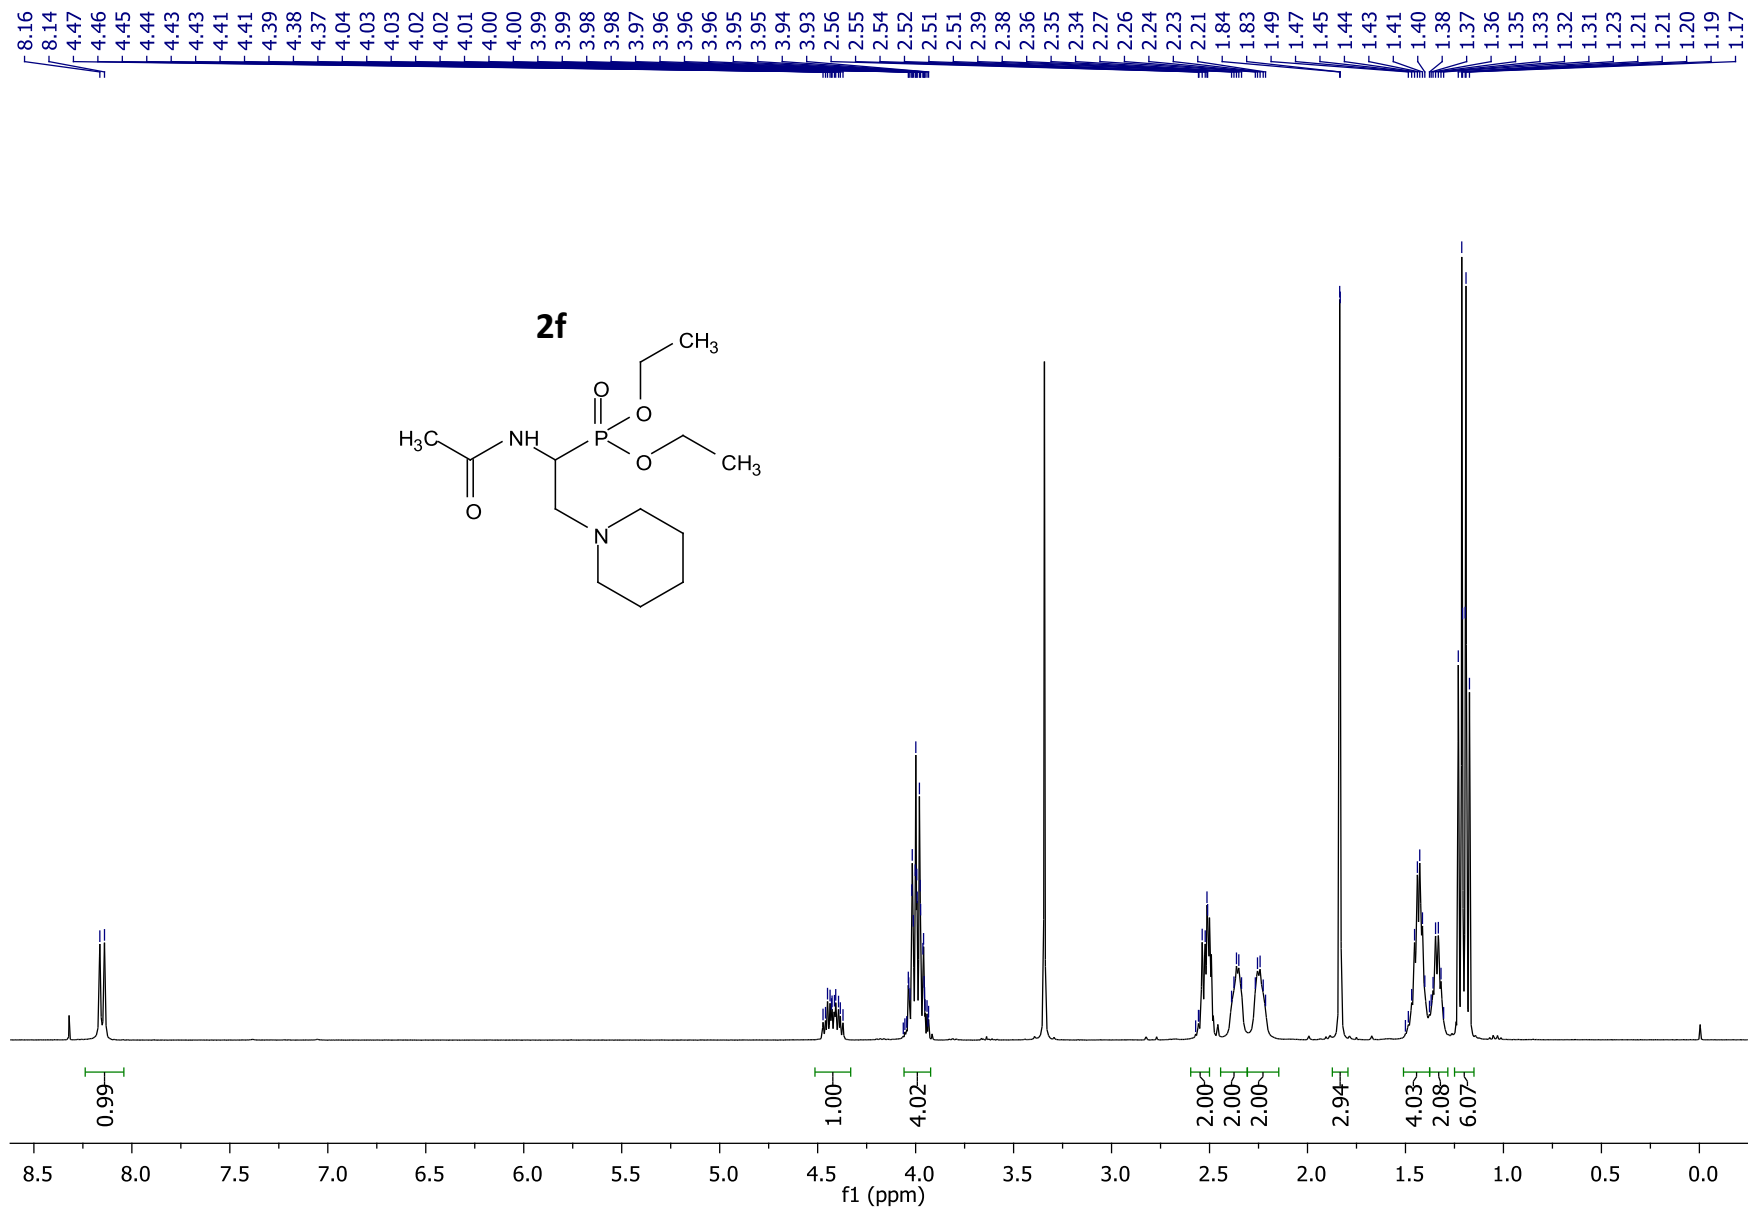

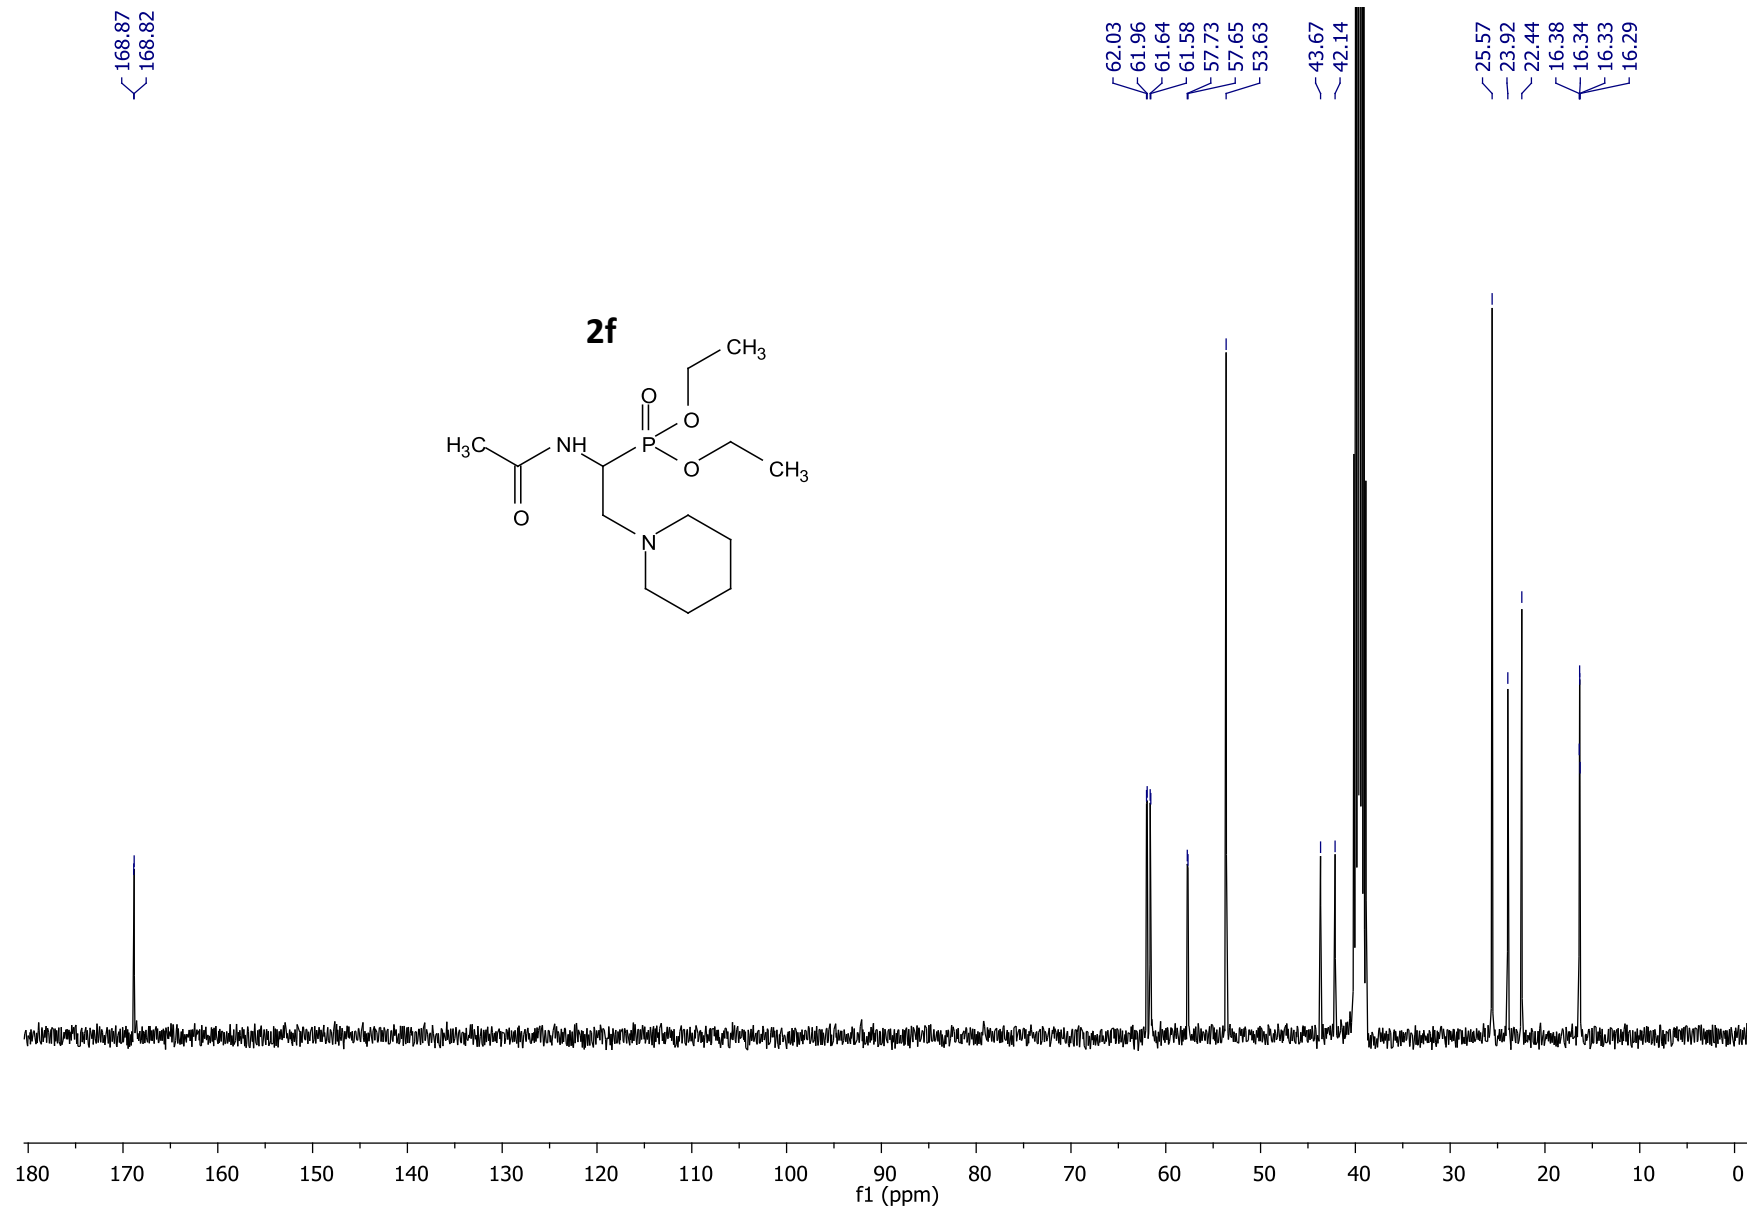

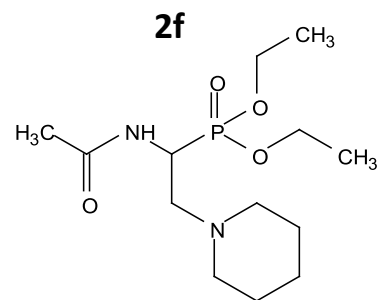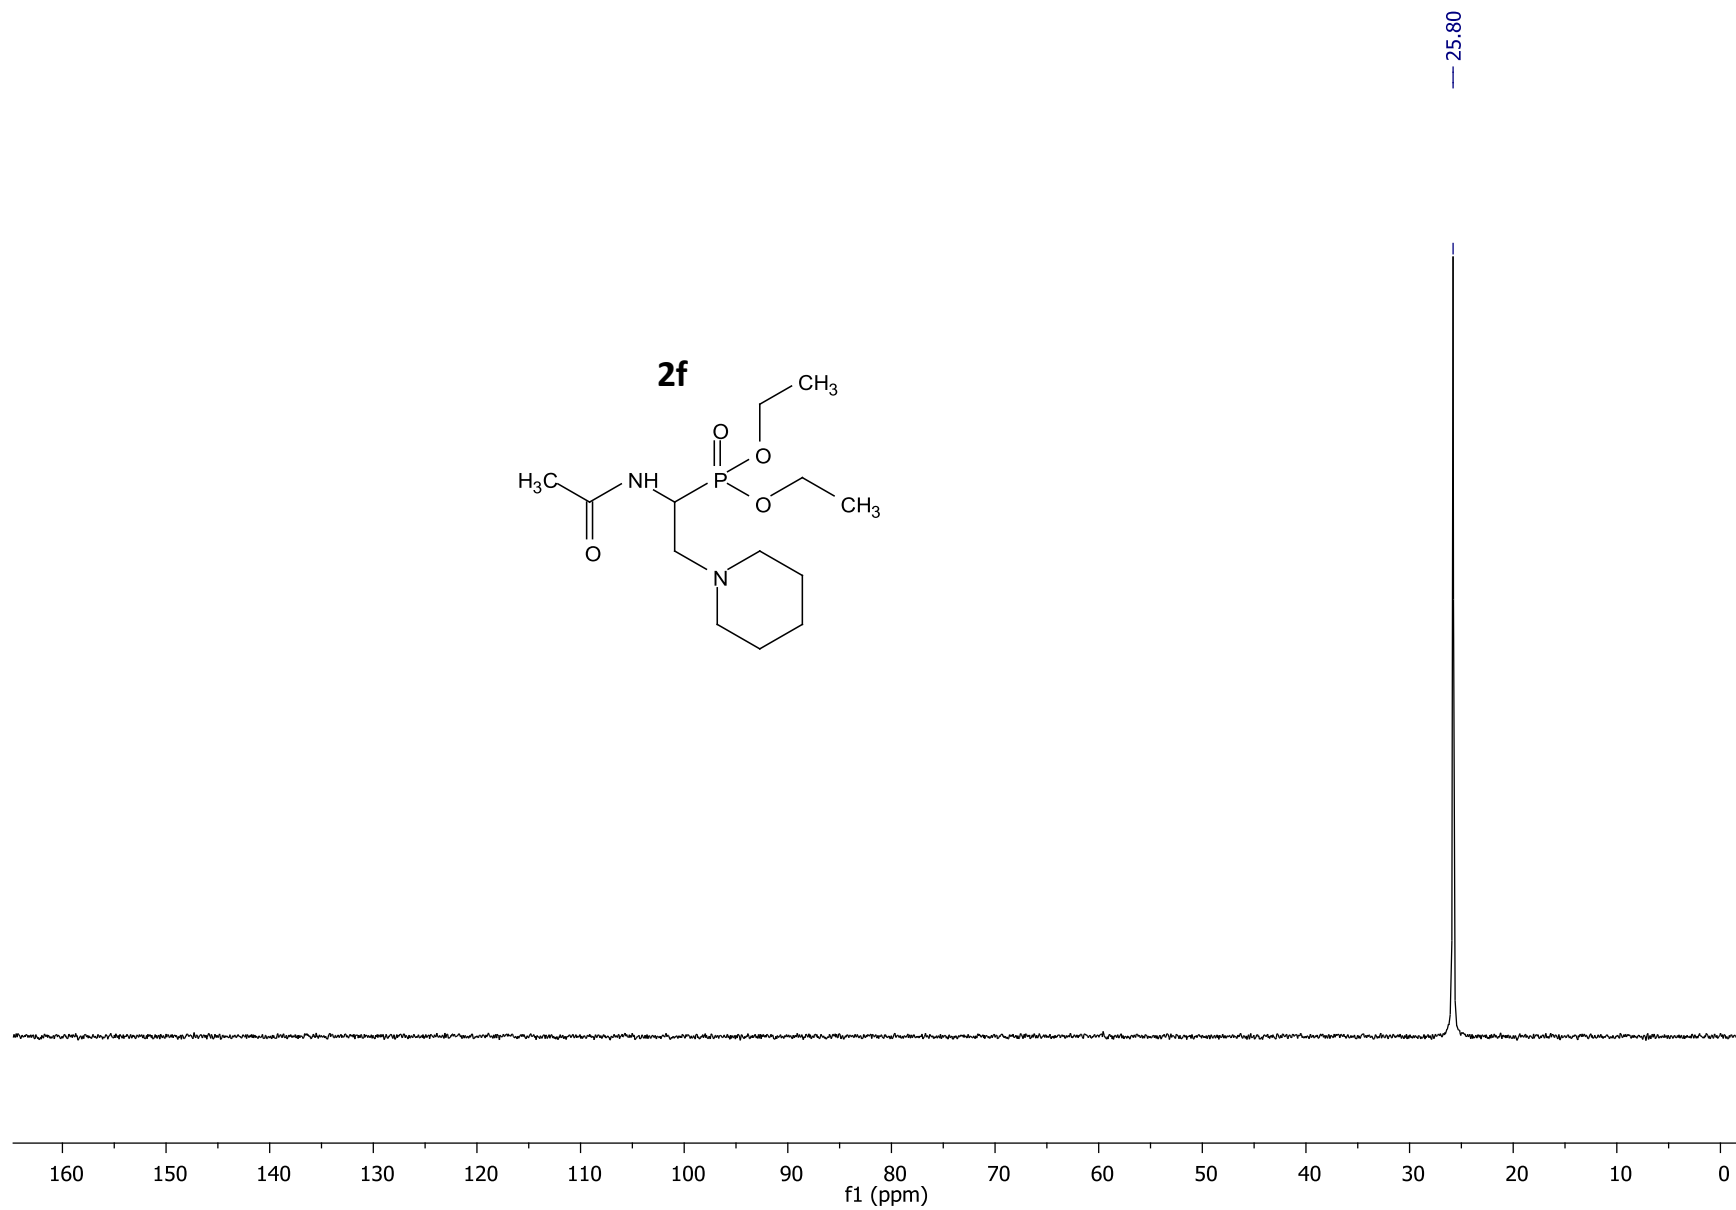

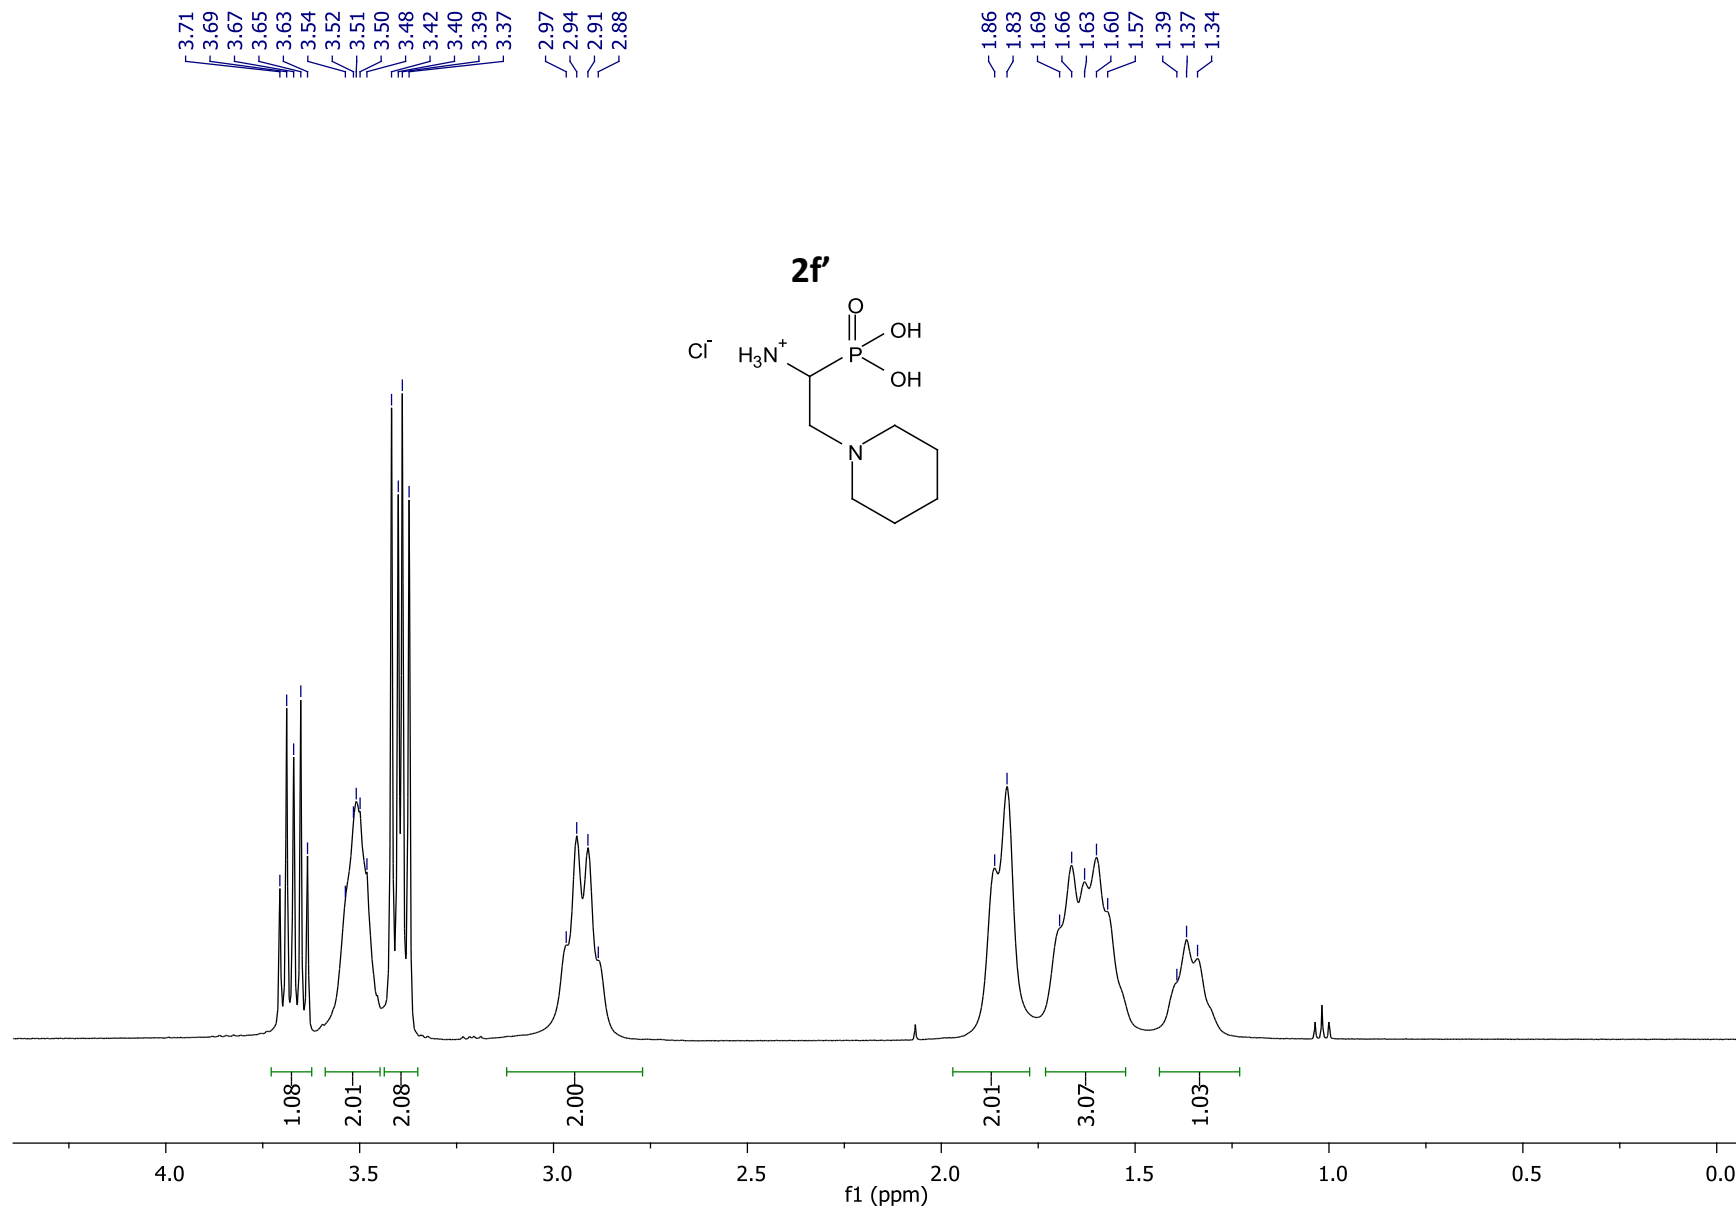



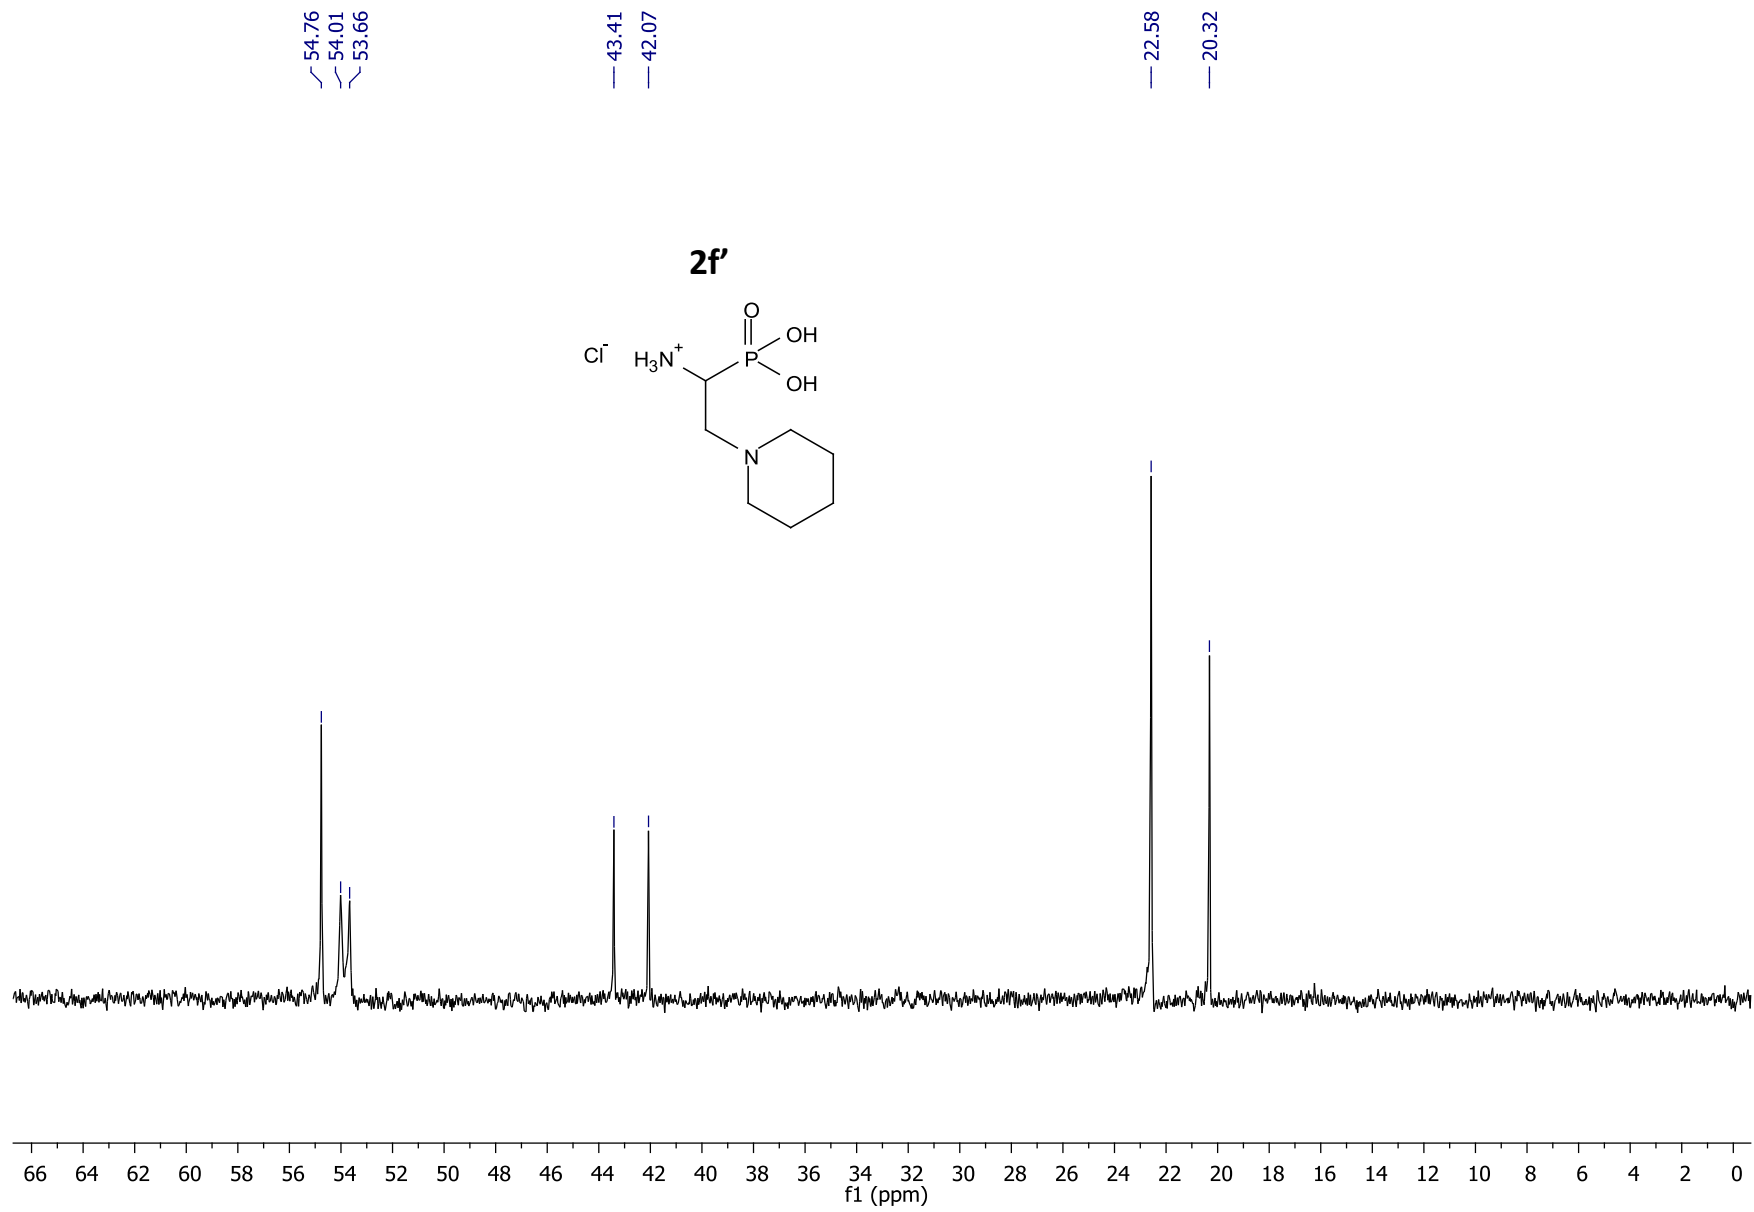

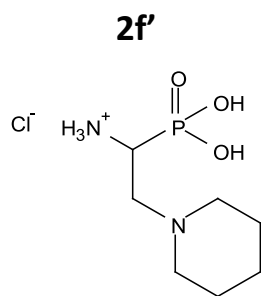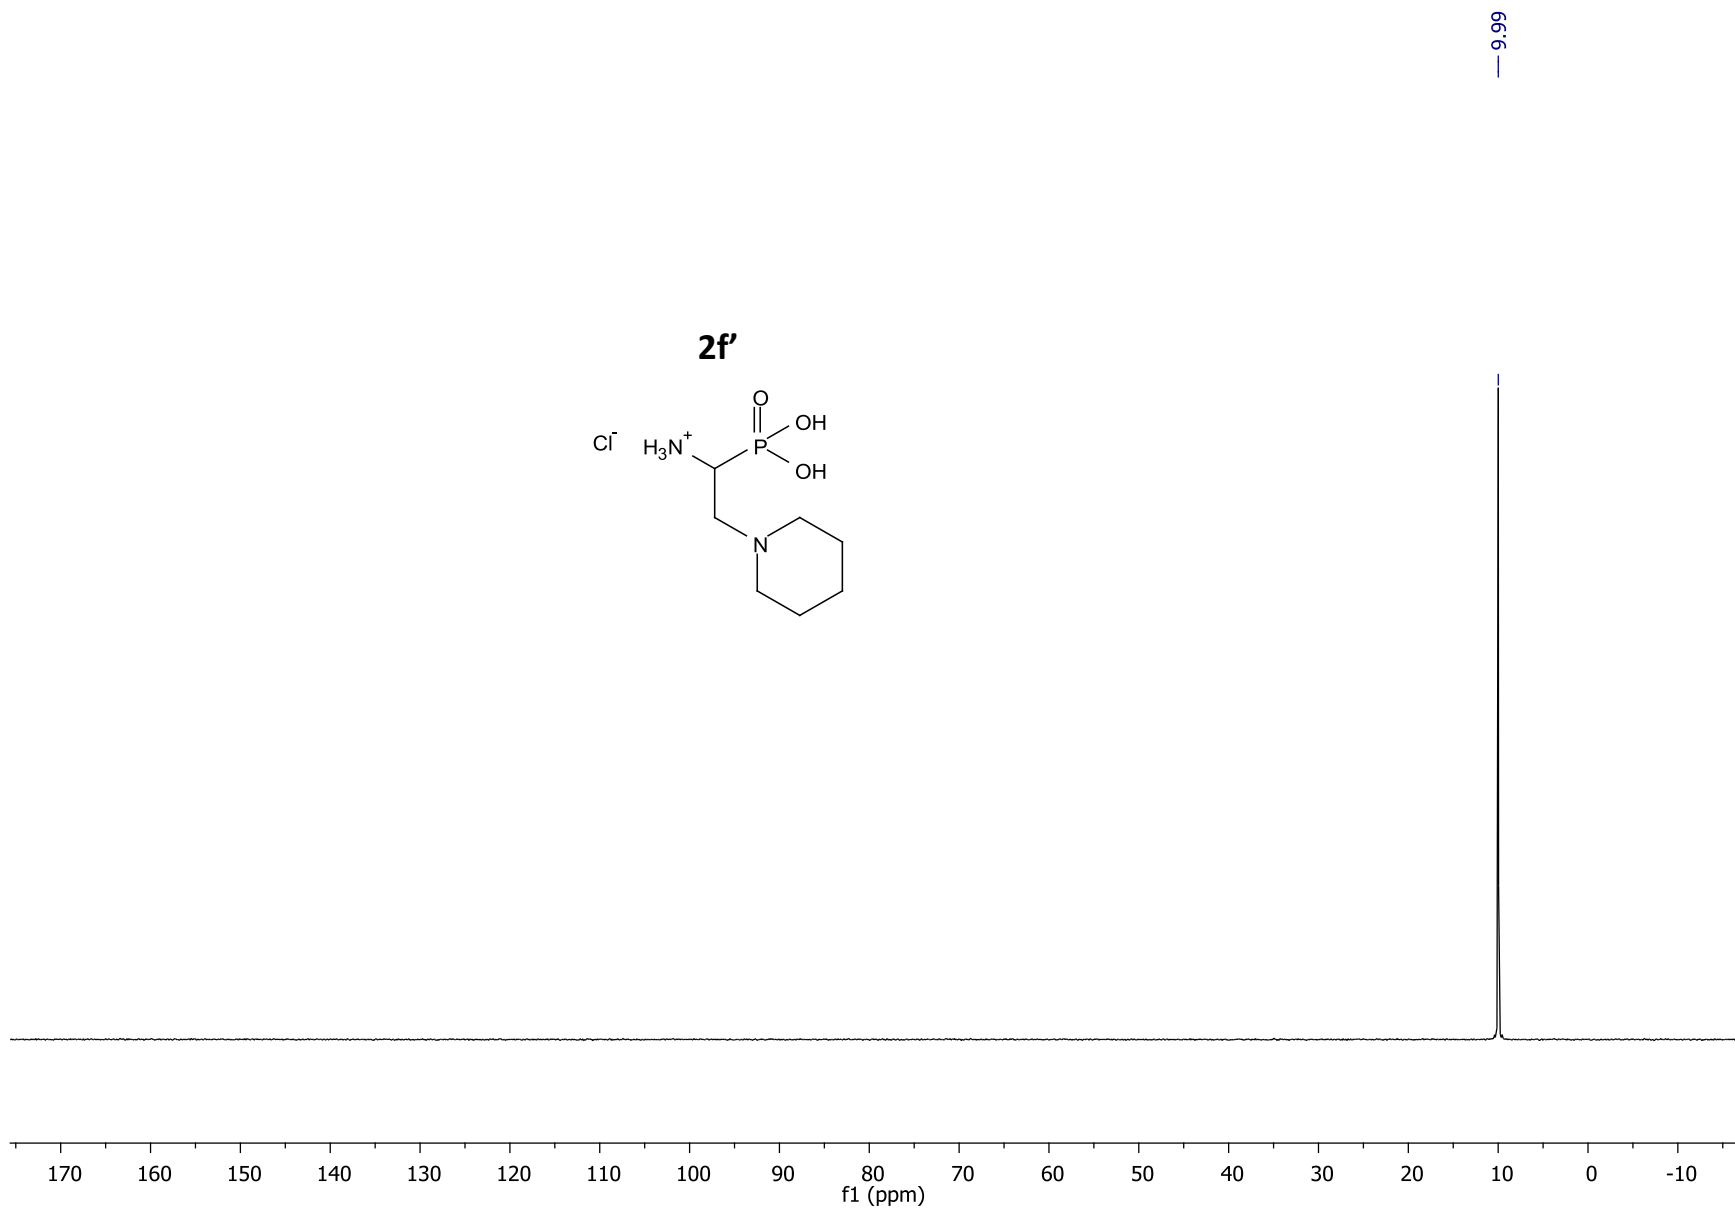

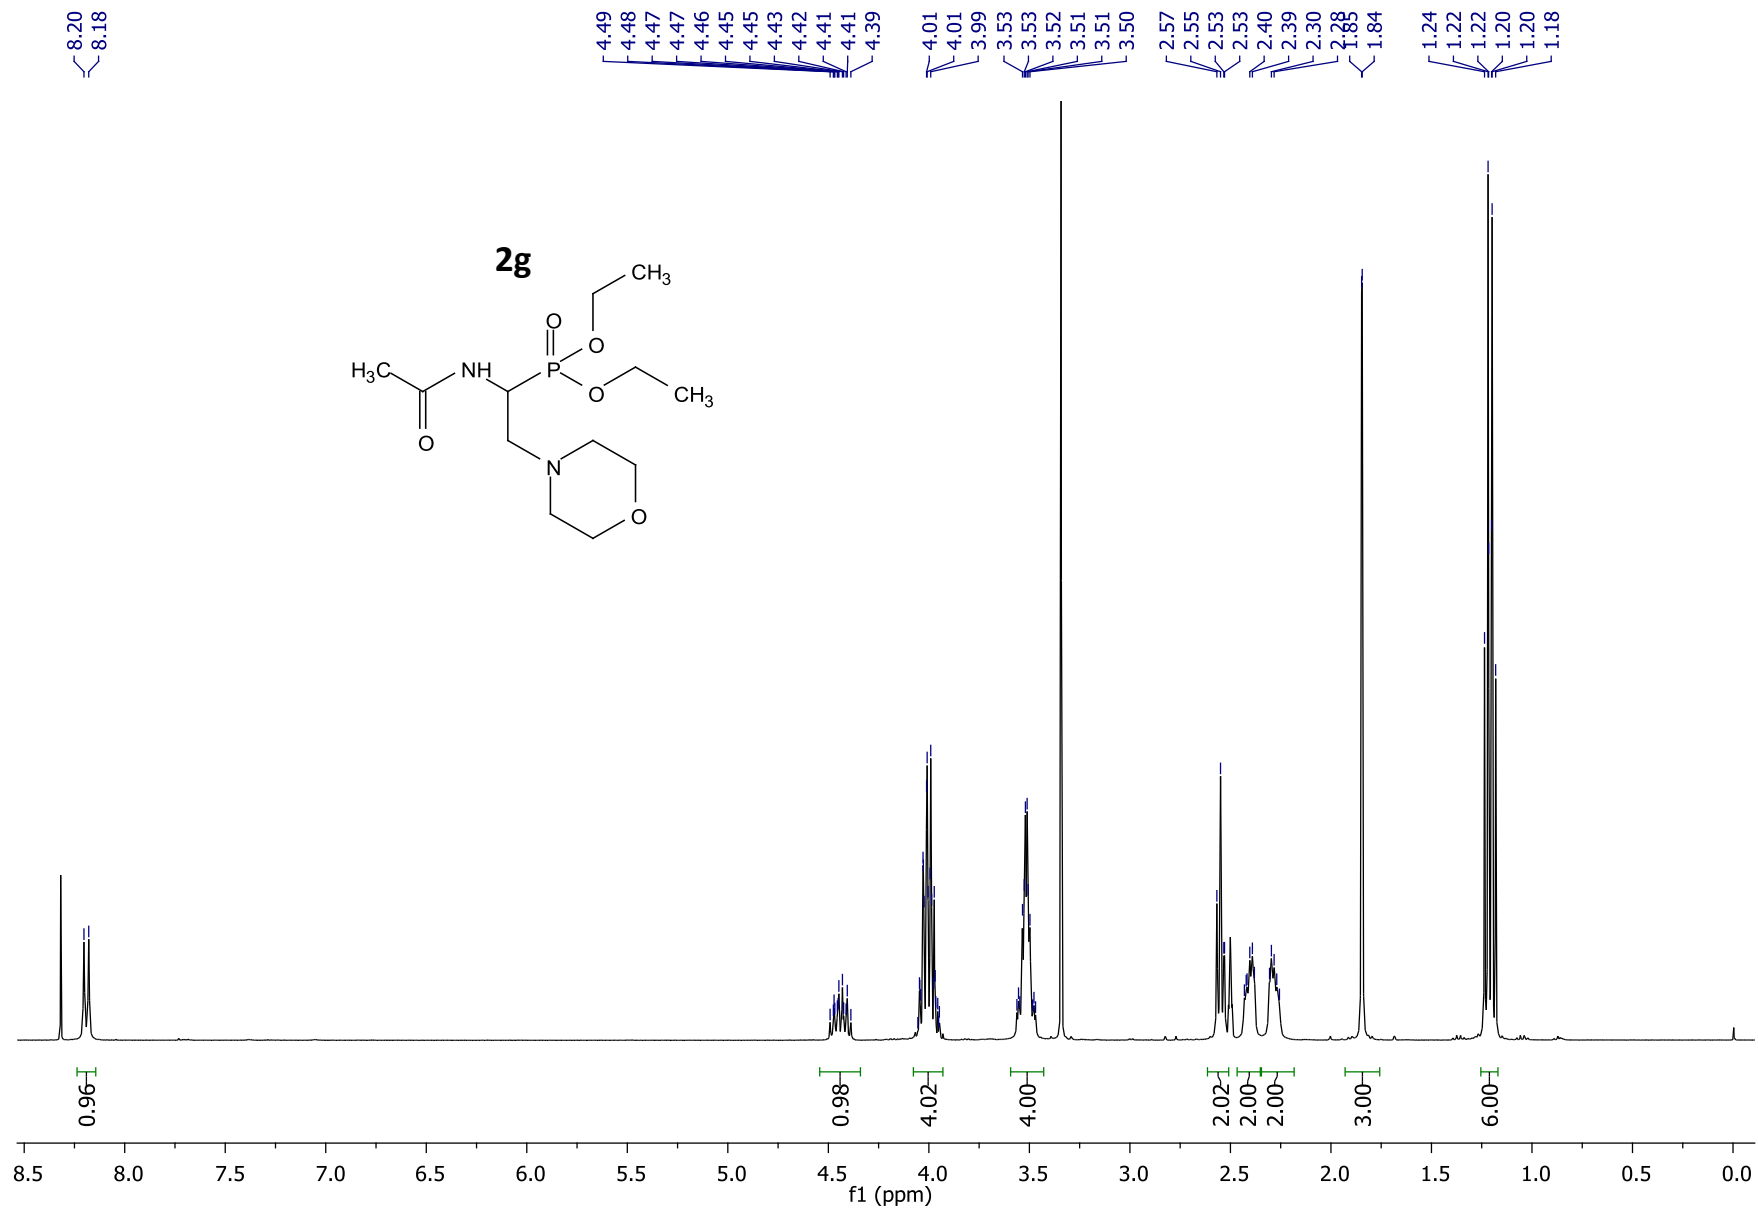

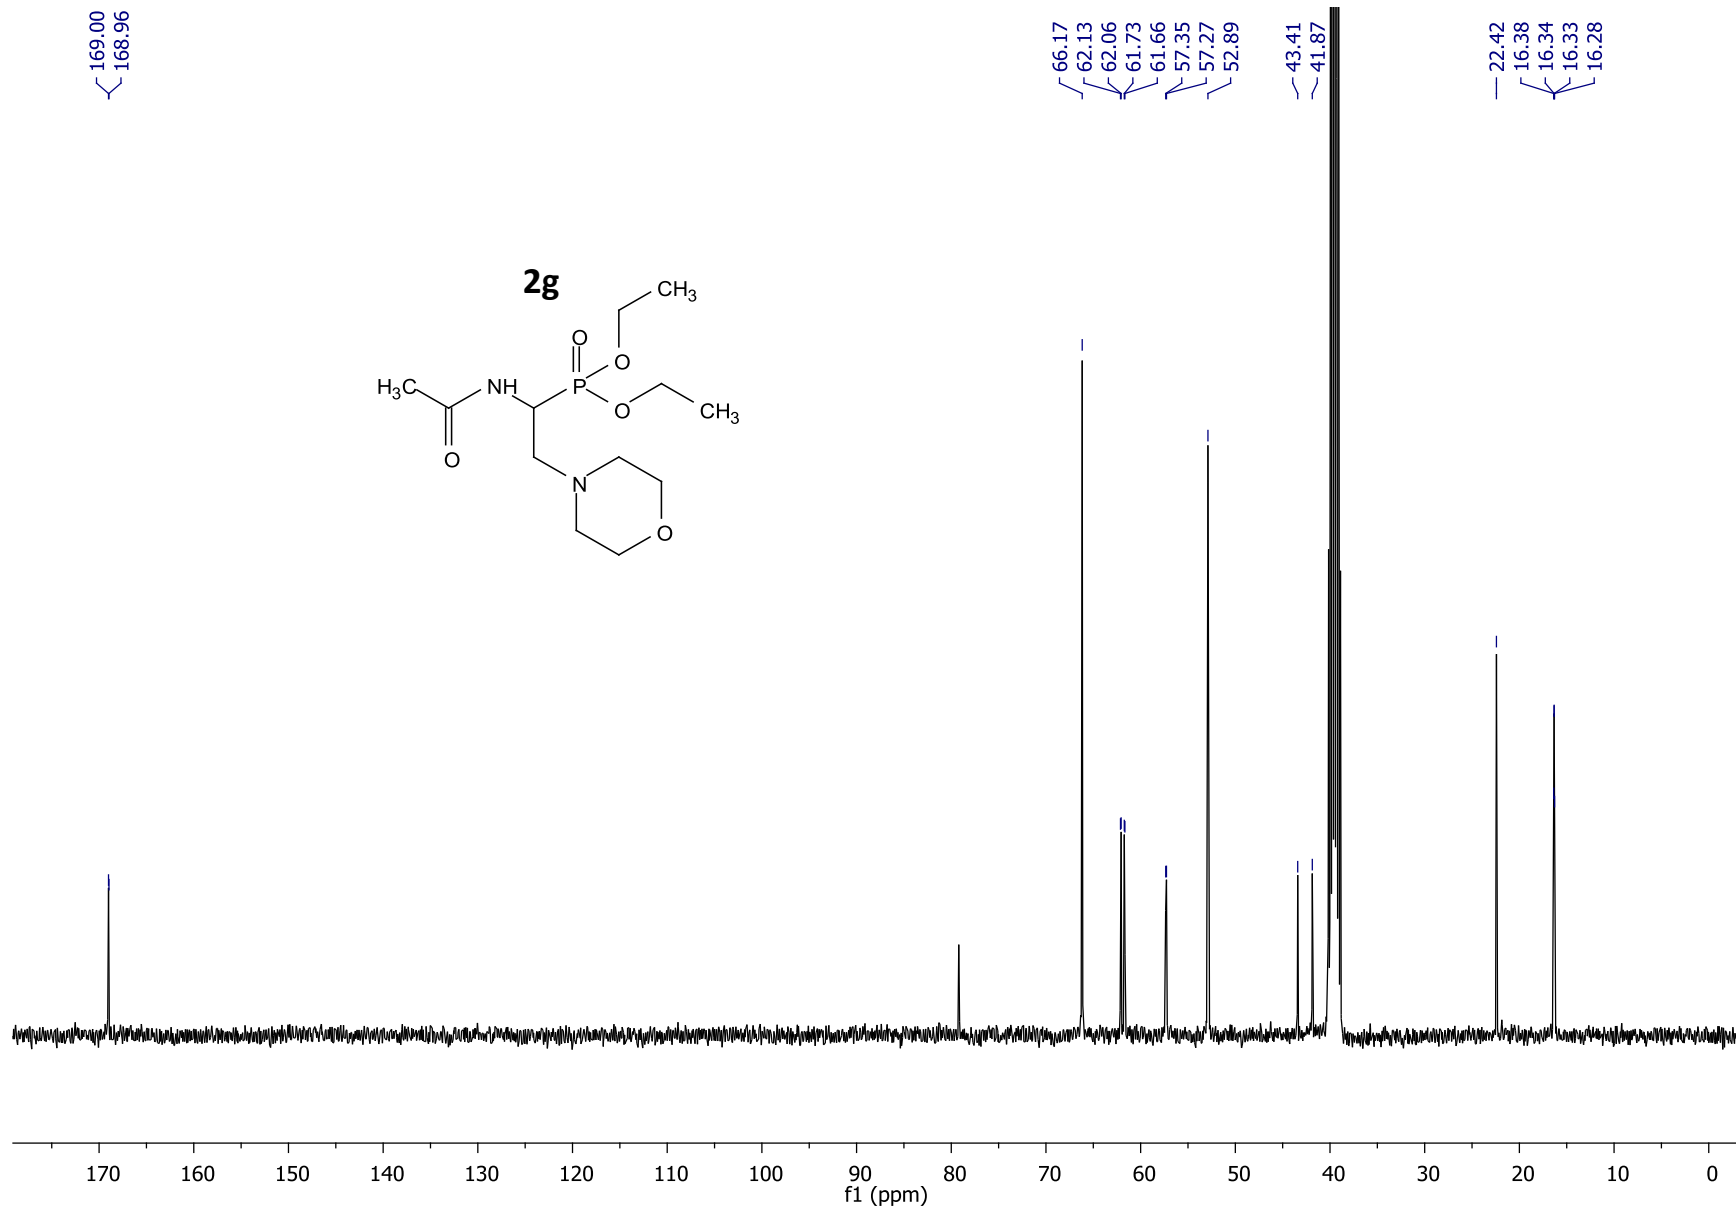

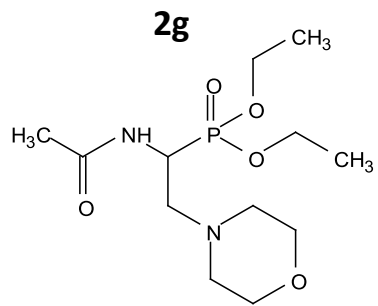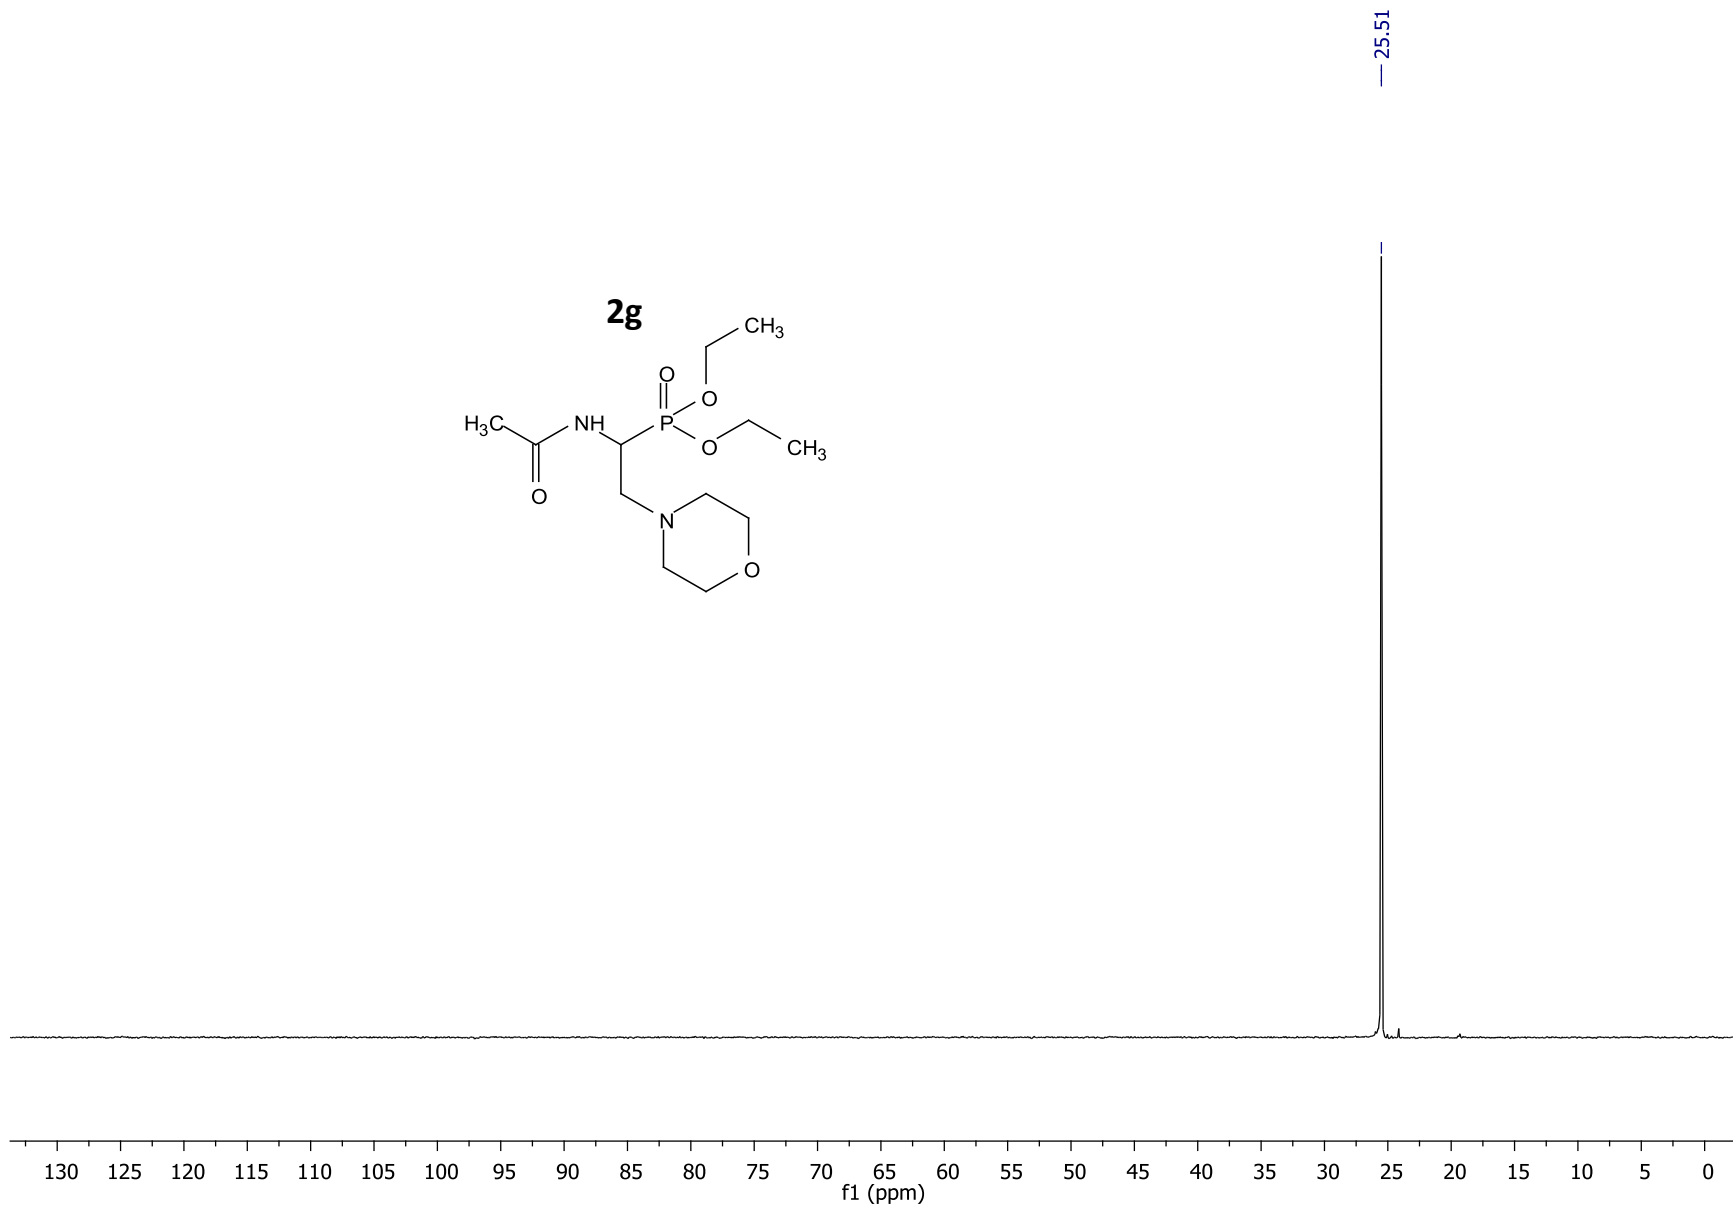

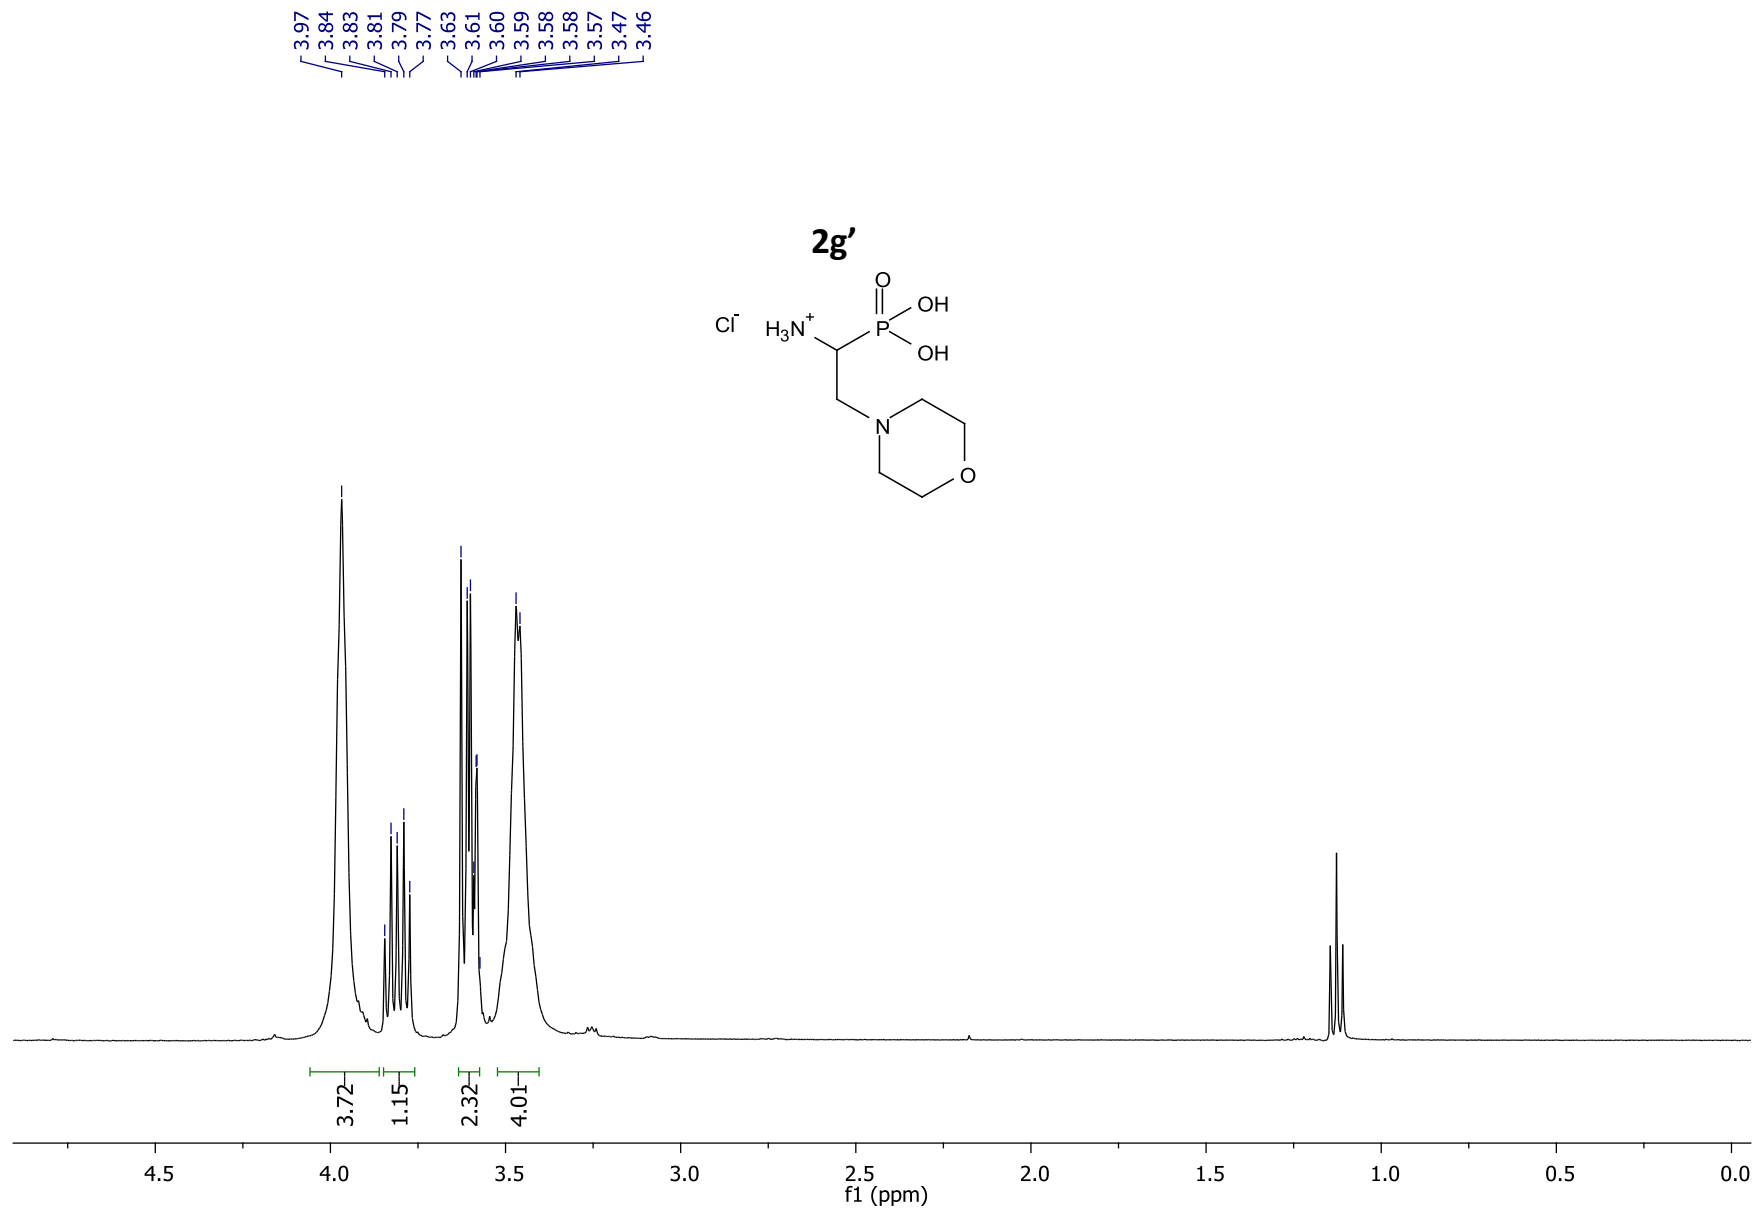

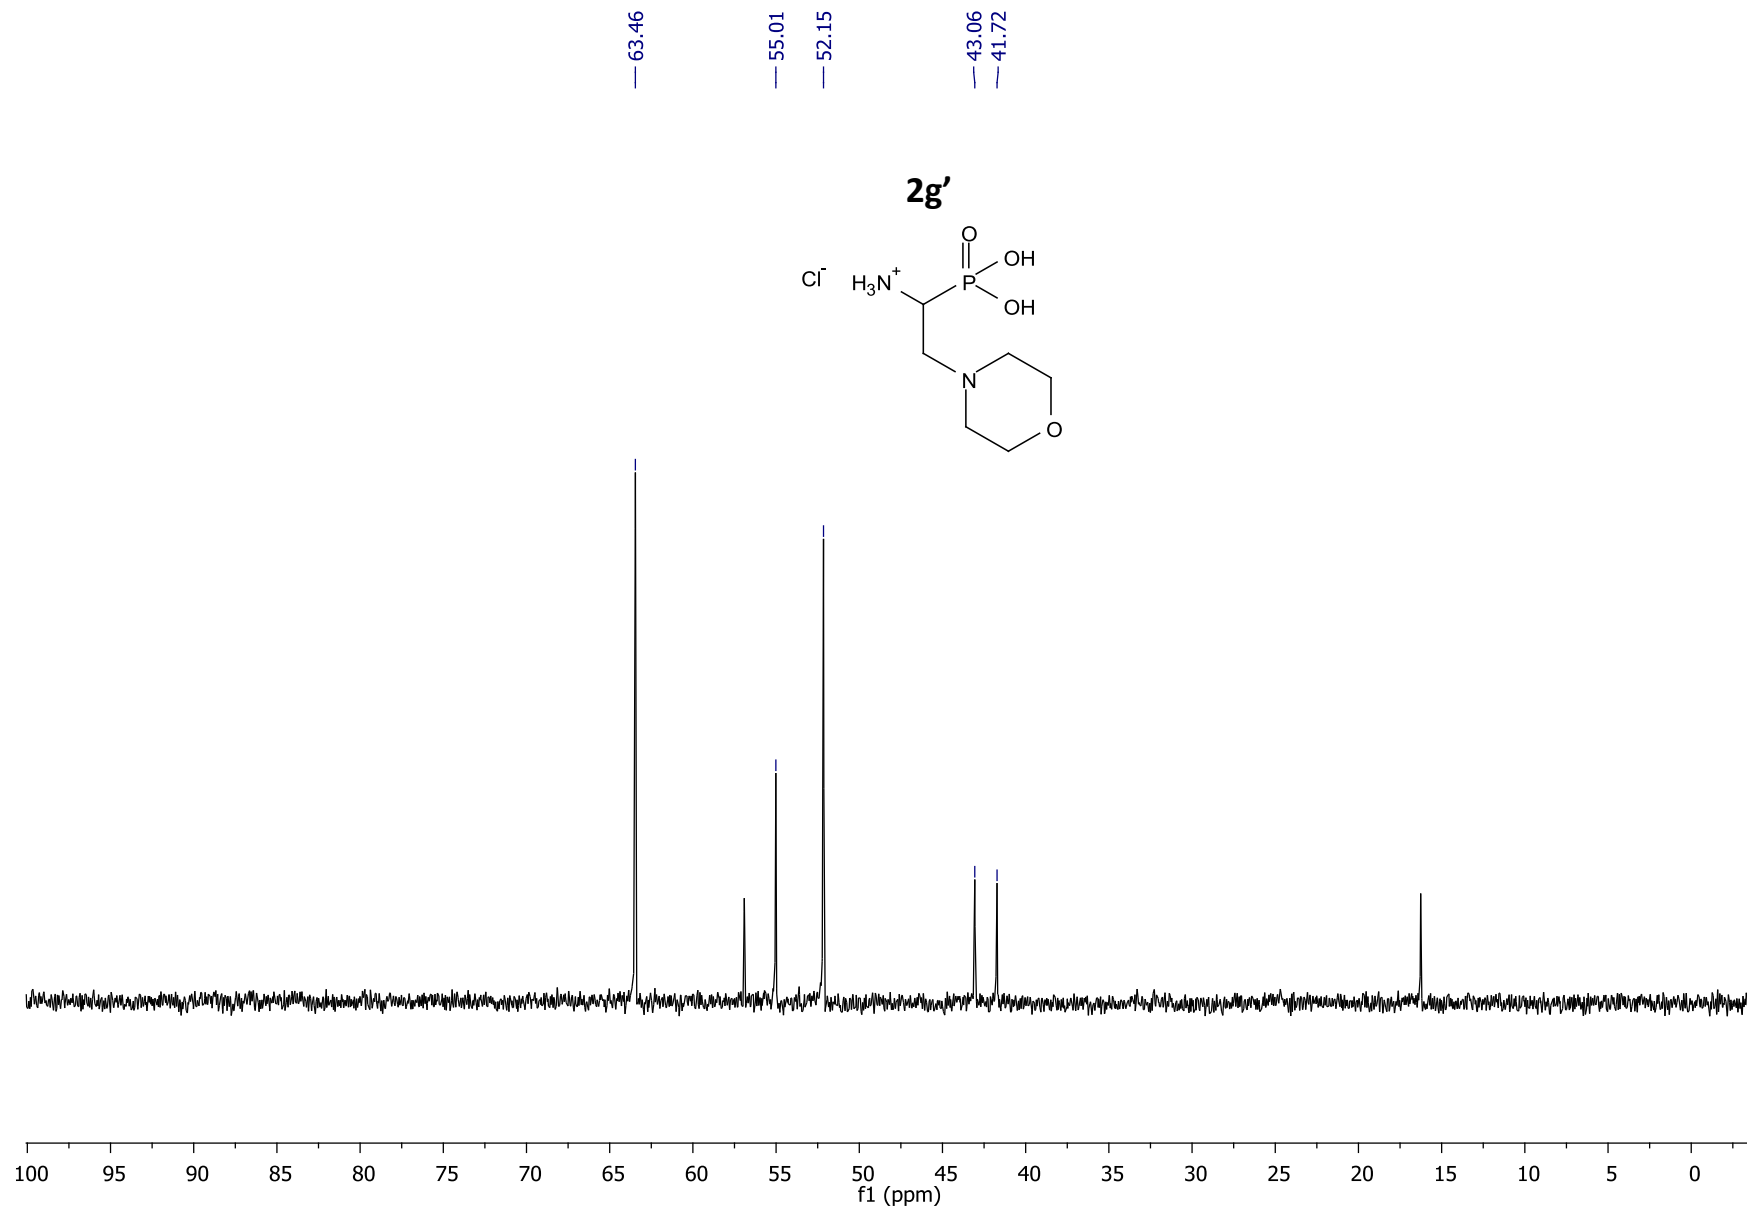

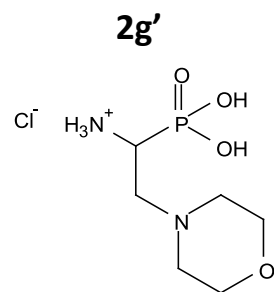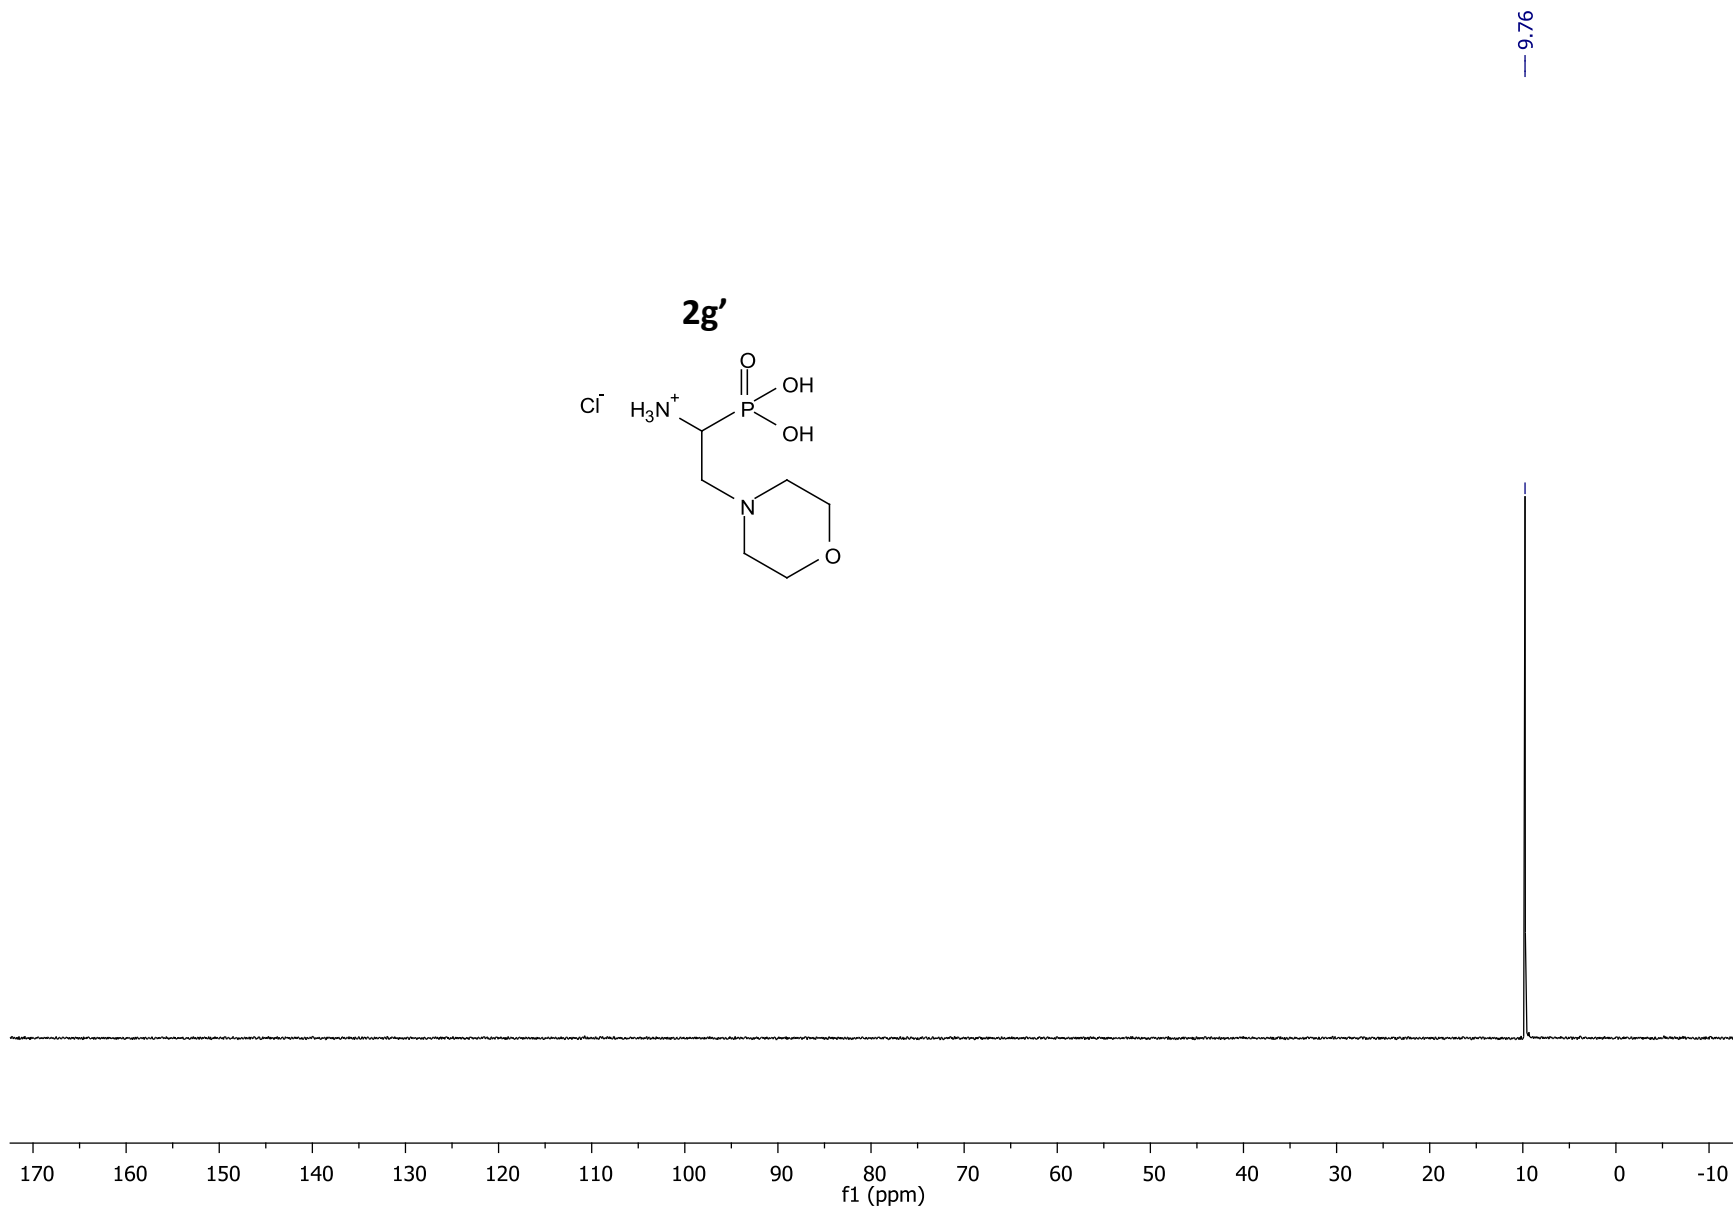



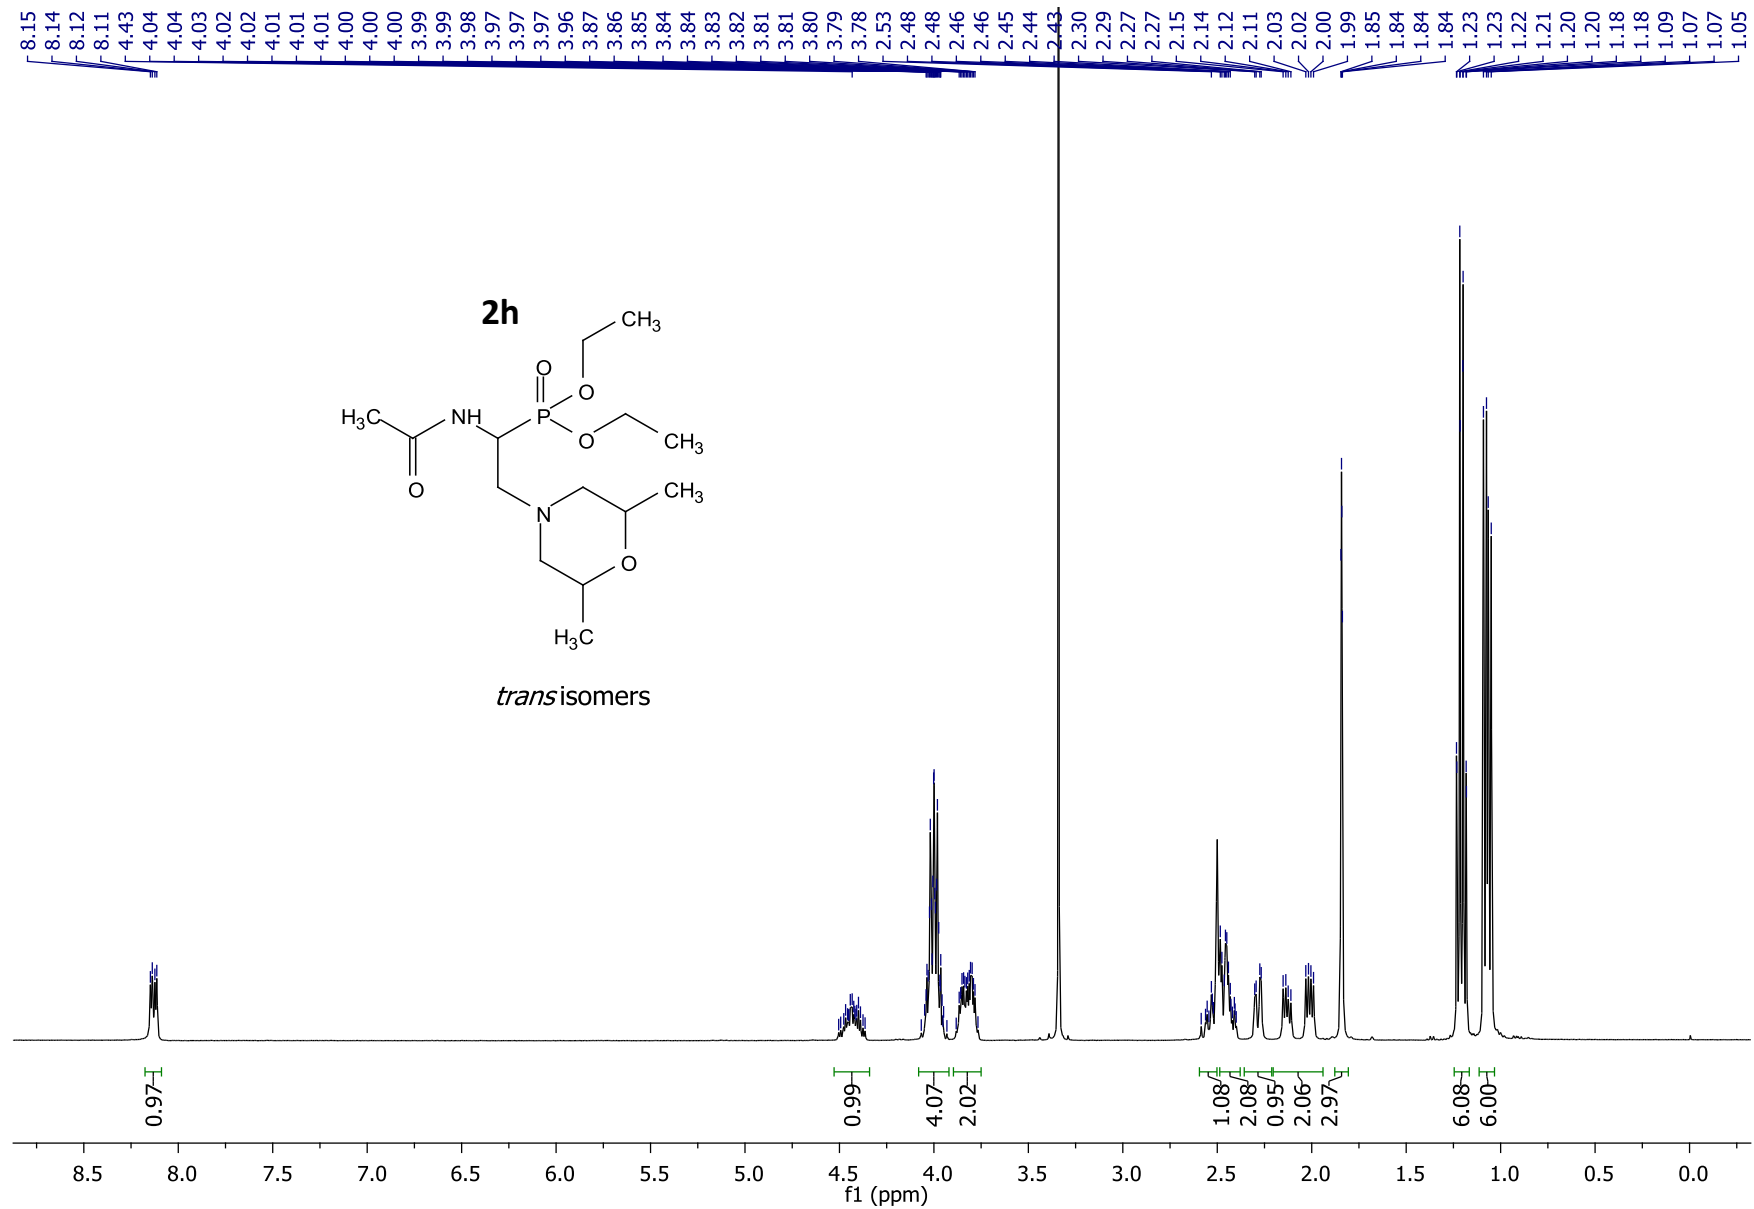

169.14  
169.08  
169.00  
168.95

65.76  
65.73  
62.15  
62.12  
62.08  
62.05  
61.67  
61.63  
61.61  
61.57  
58.06  
57.81  
57.29  
57.20  
56.81  
56.73  
43.79  
43.00  
42.26  
41.45

22.36  
22.34  
17.96  
17.88  
16.37  
16.32  
16.27

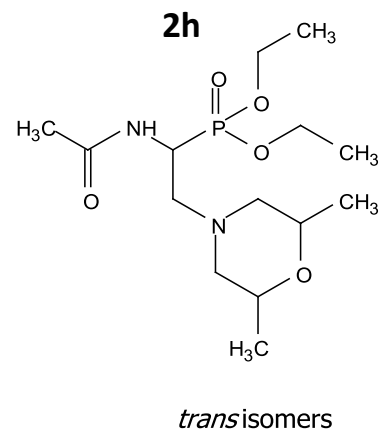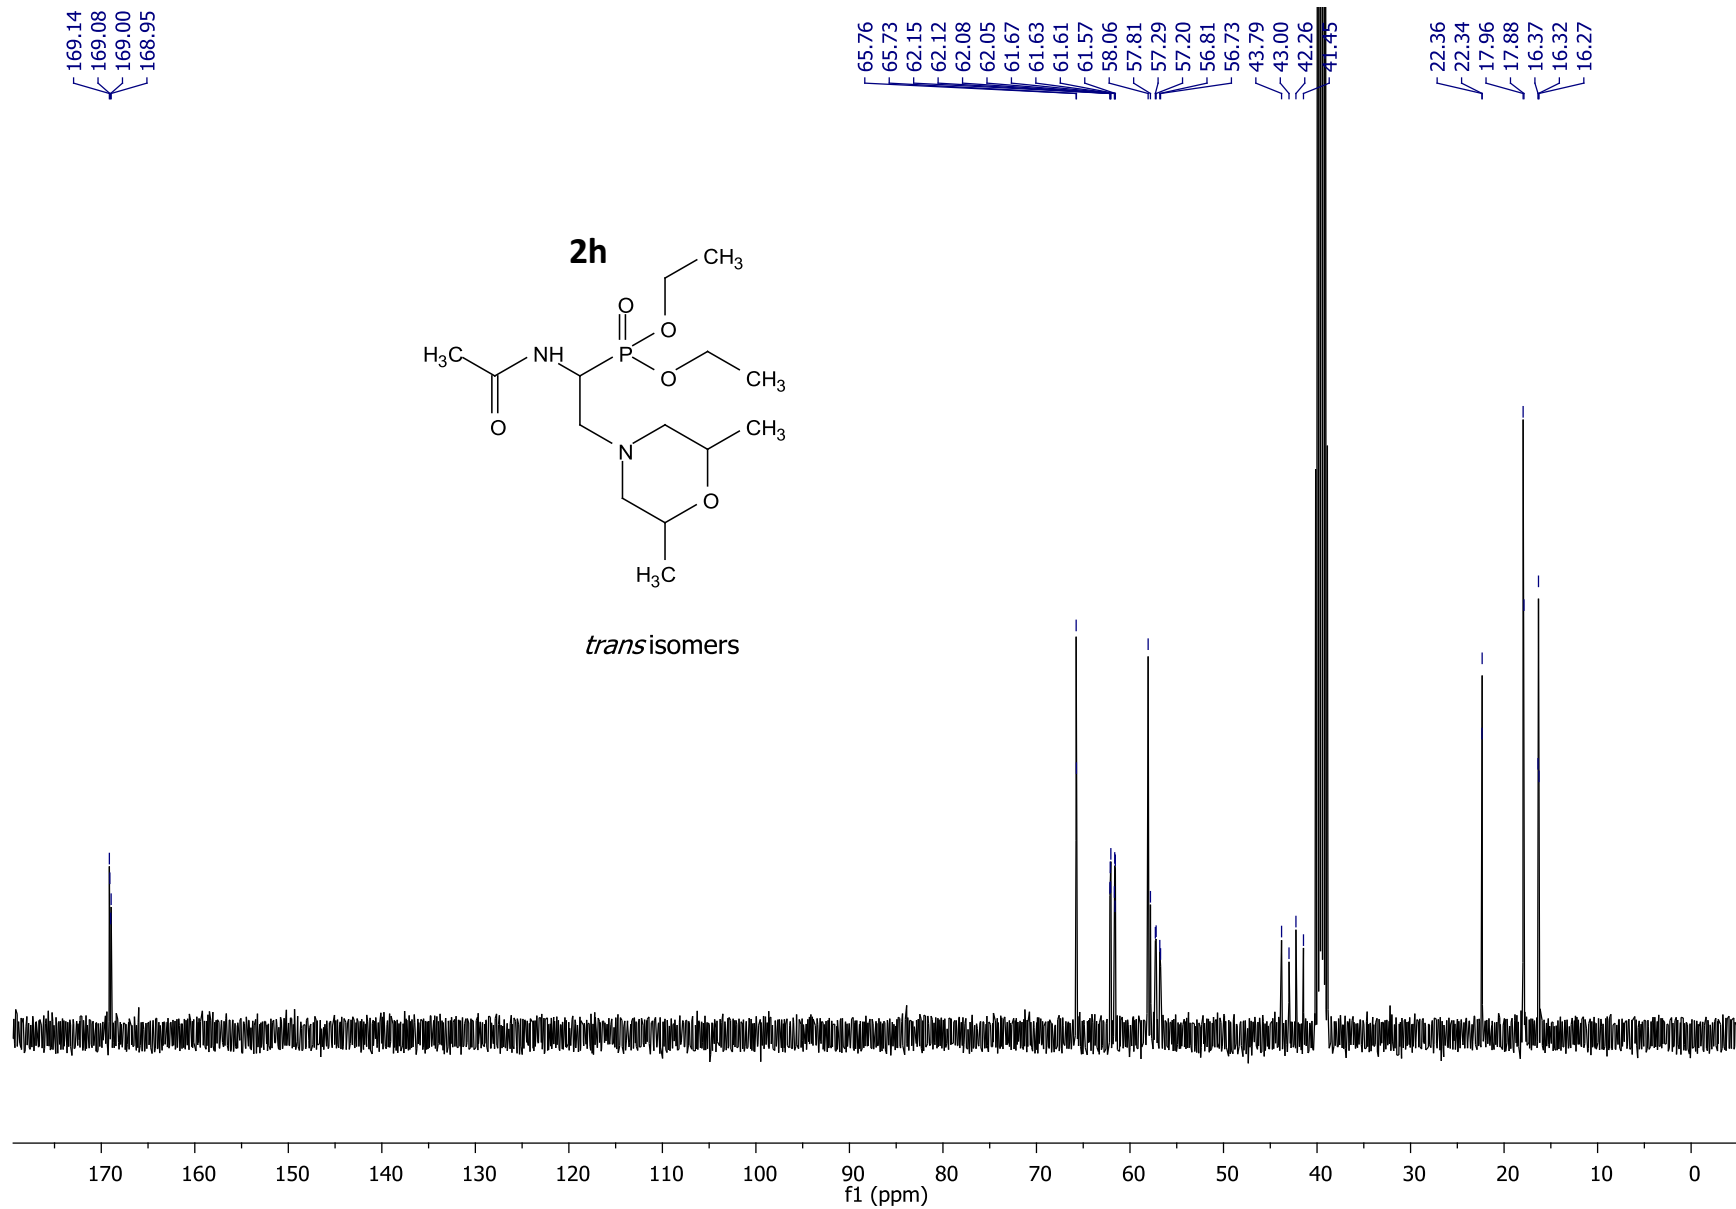

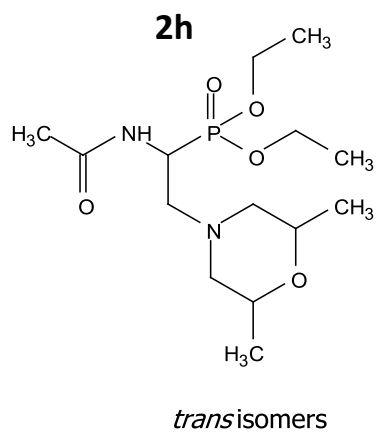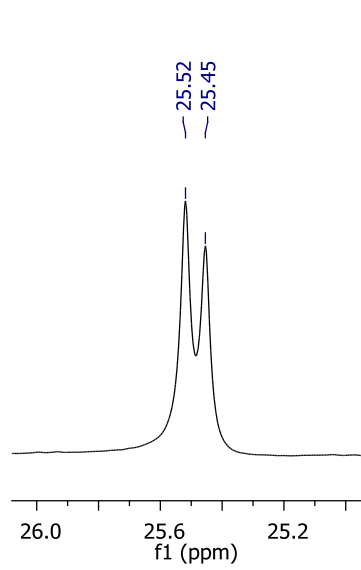

25.52  
25.45

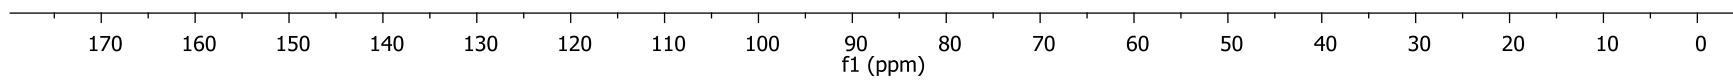

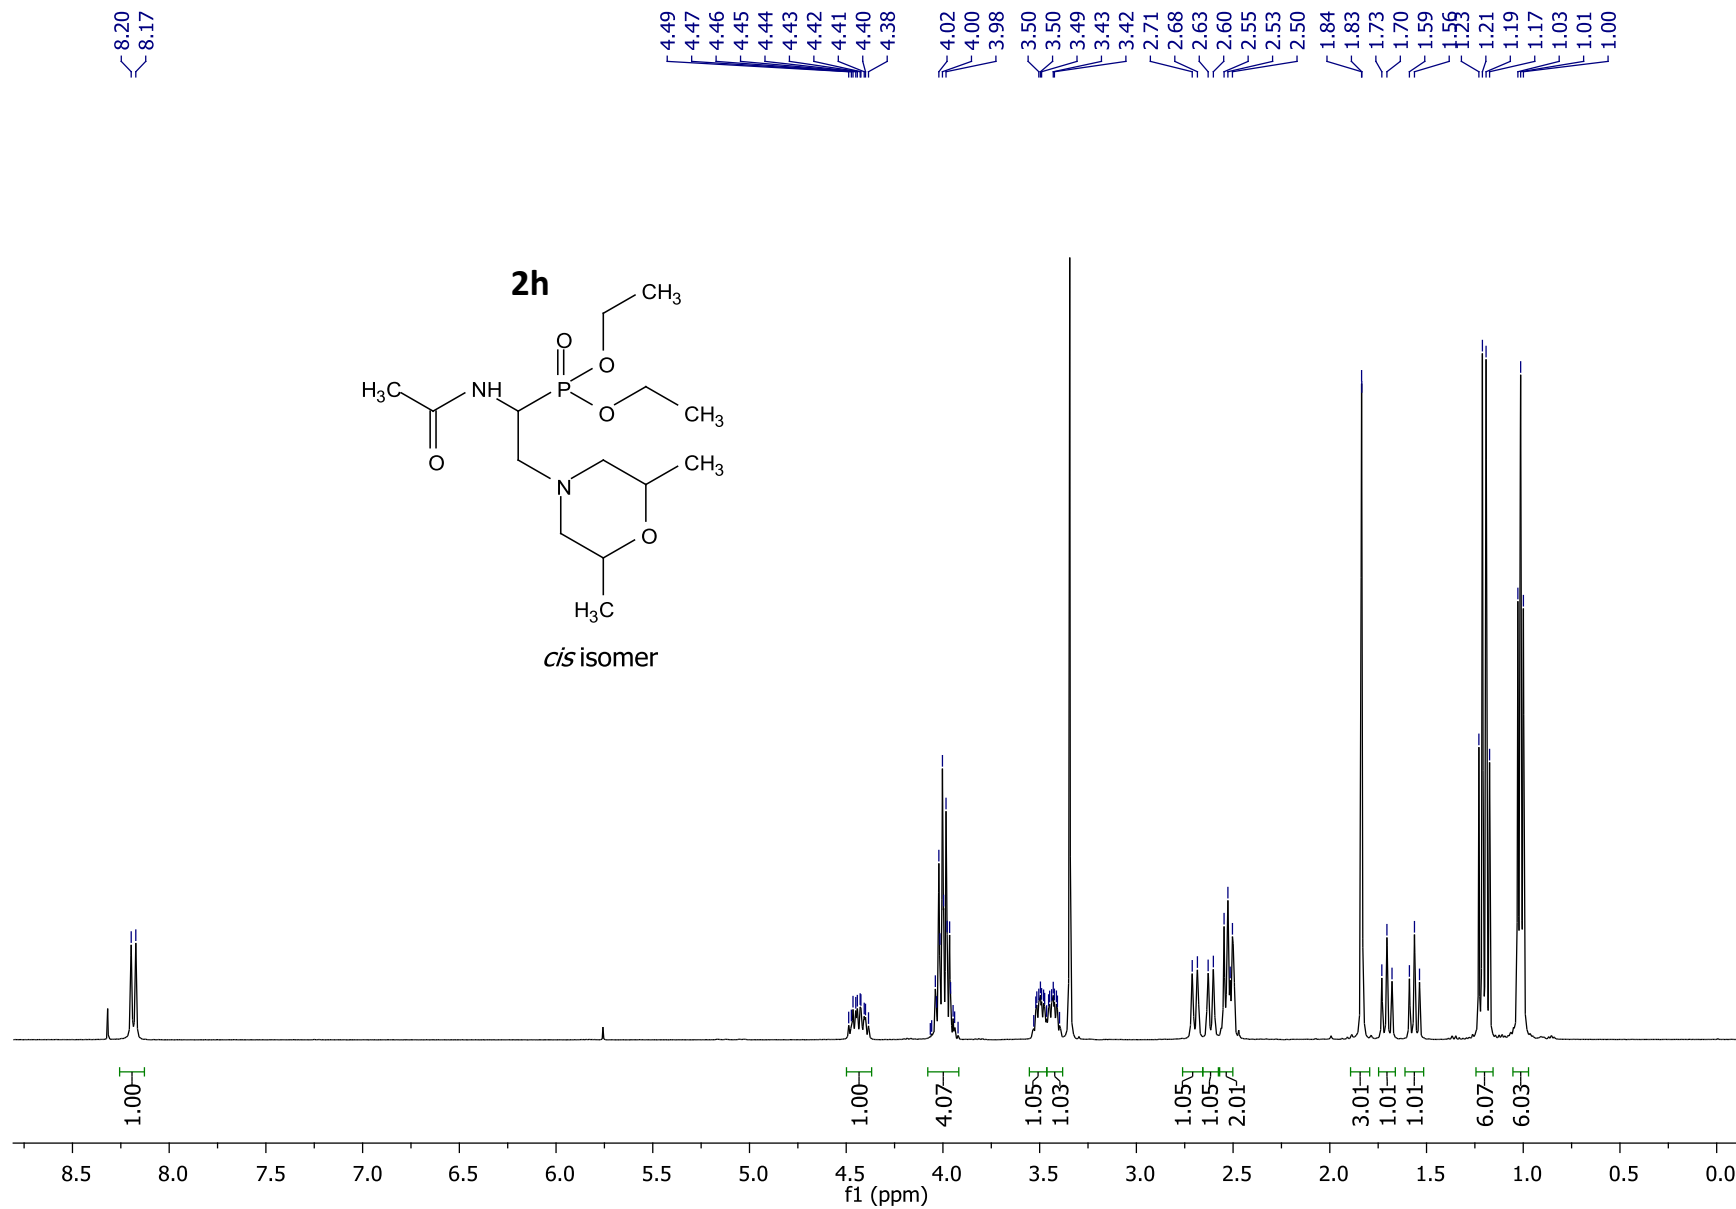

168.99  
168.94

71.00  
70.93  
62.11  
62.04  
61.71  
61.65  
59.25  
58.09  
57.06  
56.98  
43.39  
41.85

22.42  
18.99  
18.97  
16.38  
16.35  
16.33  
16.30

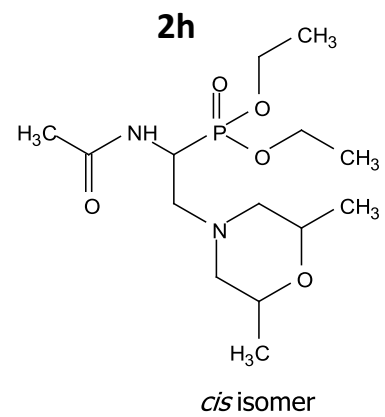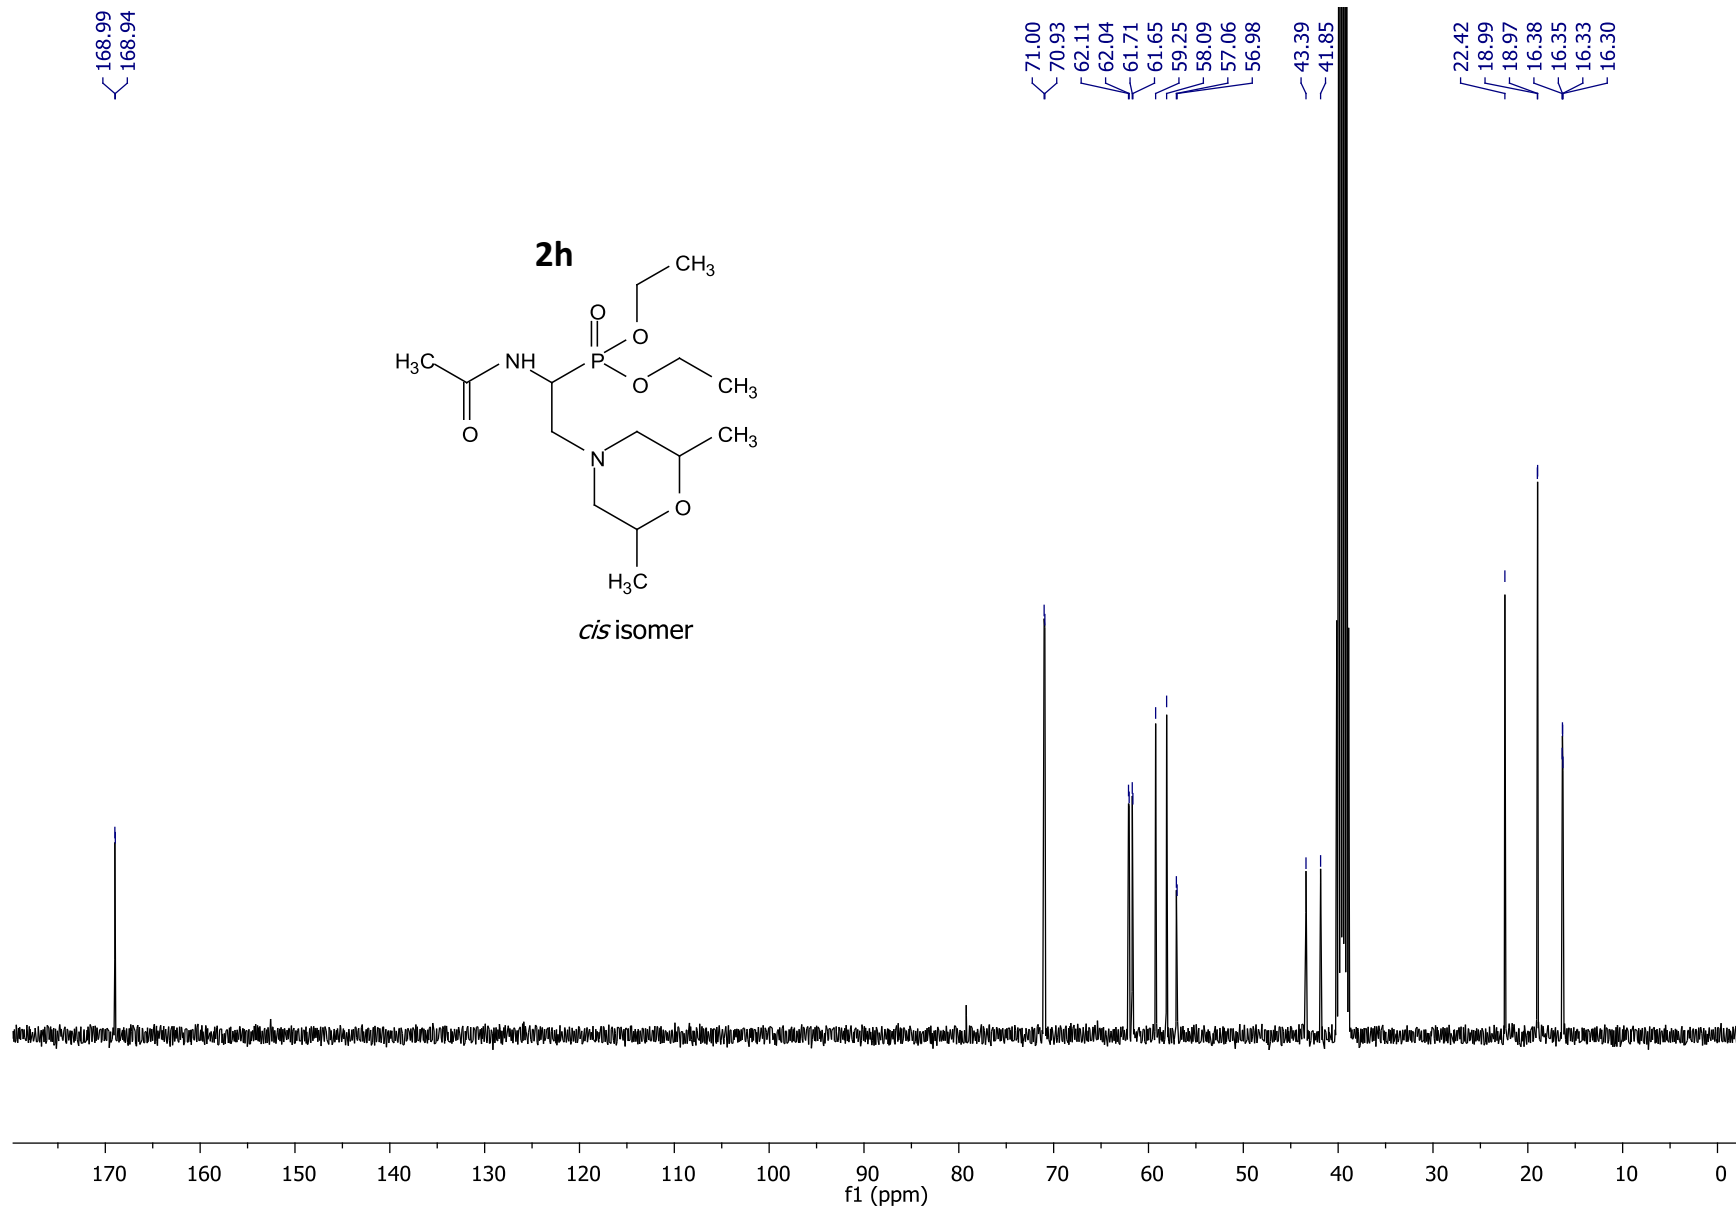

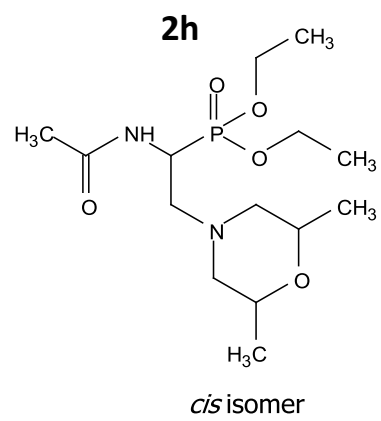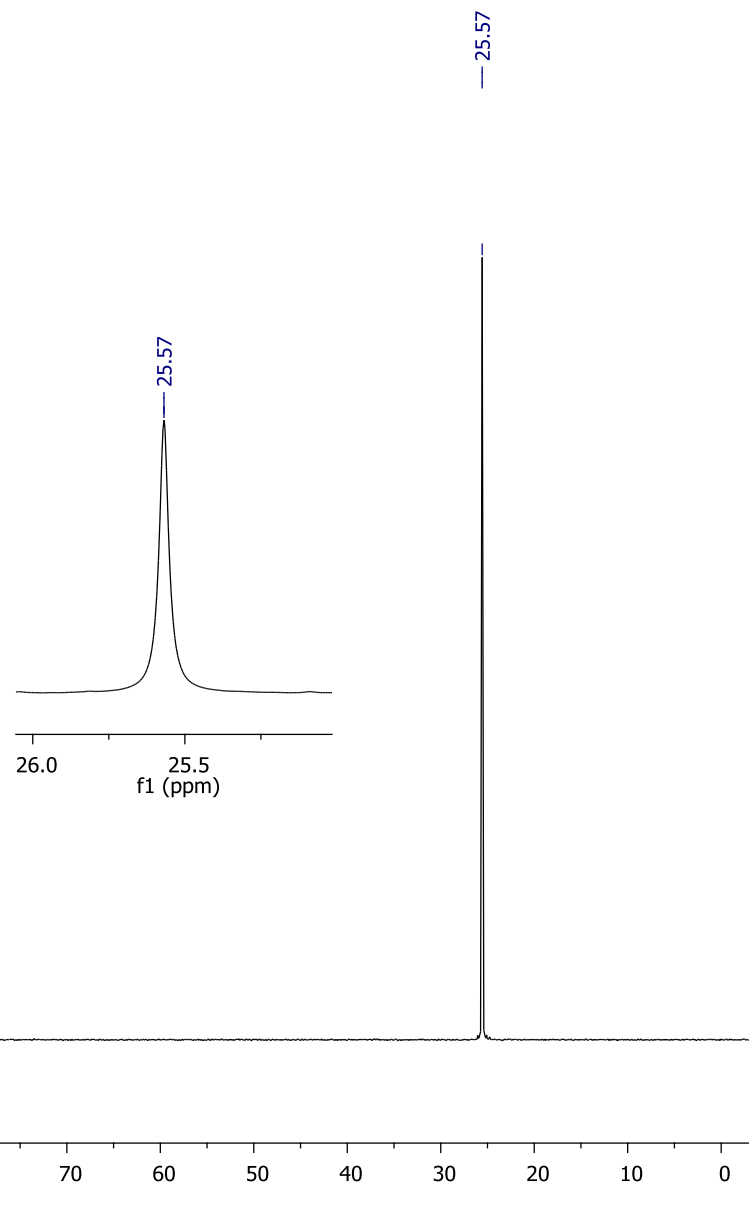

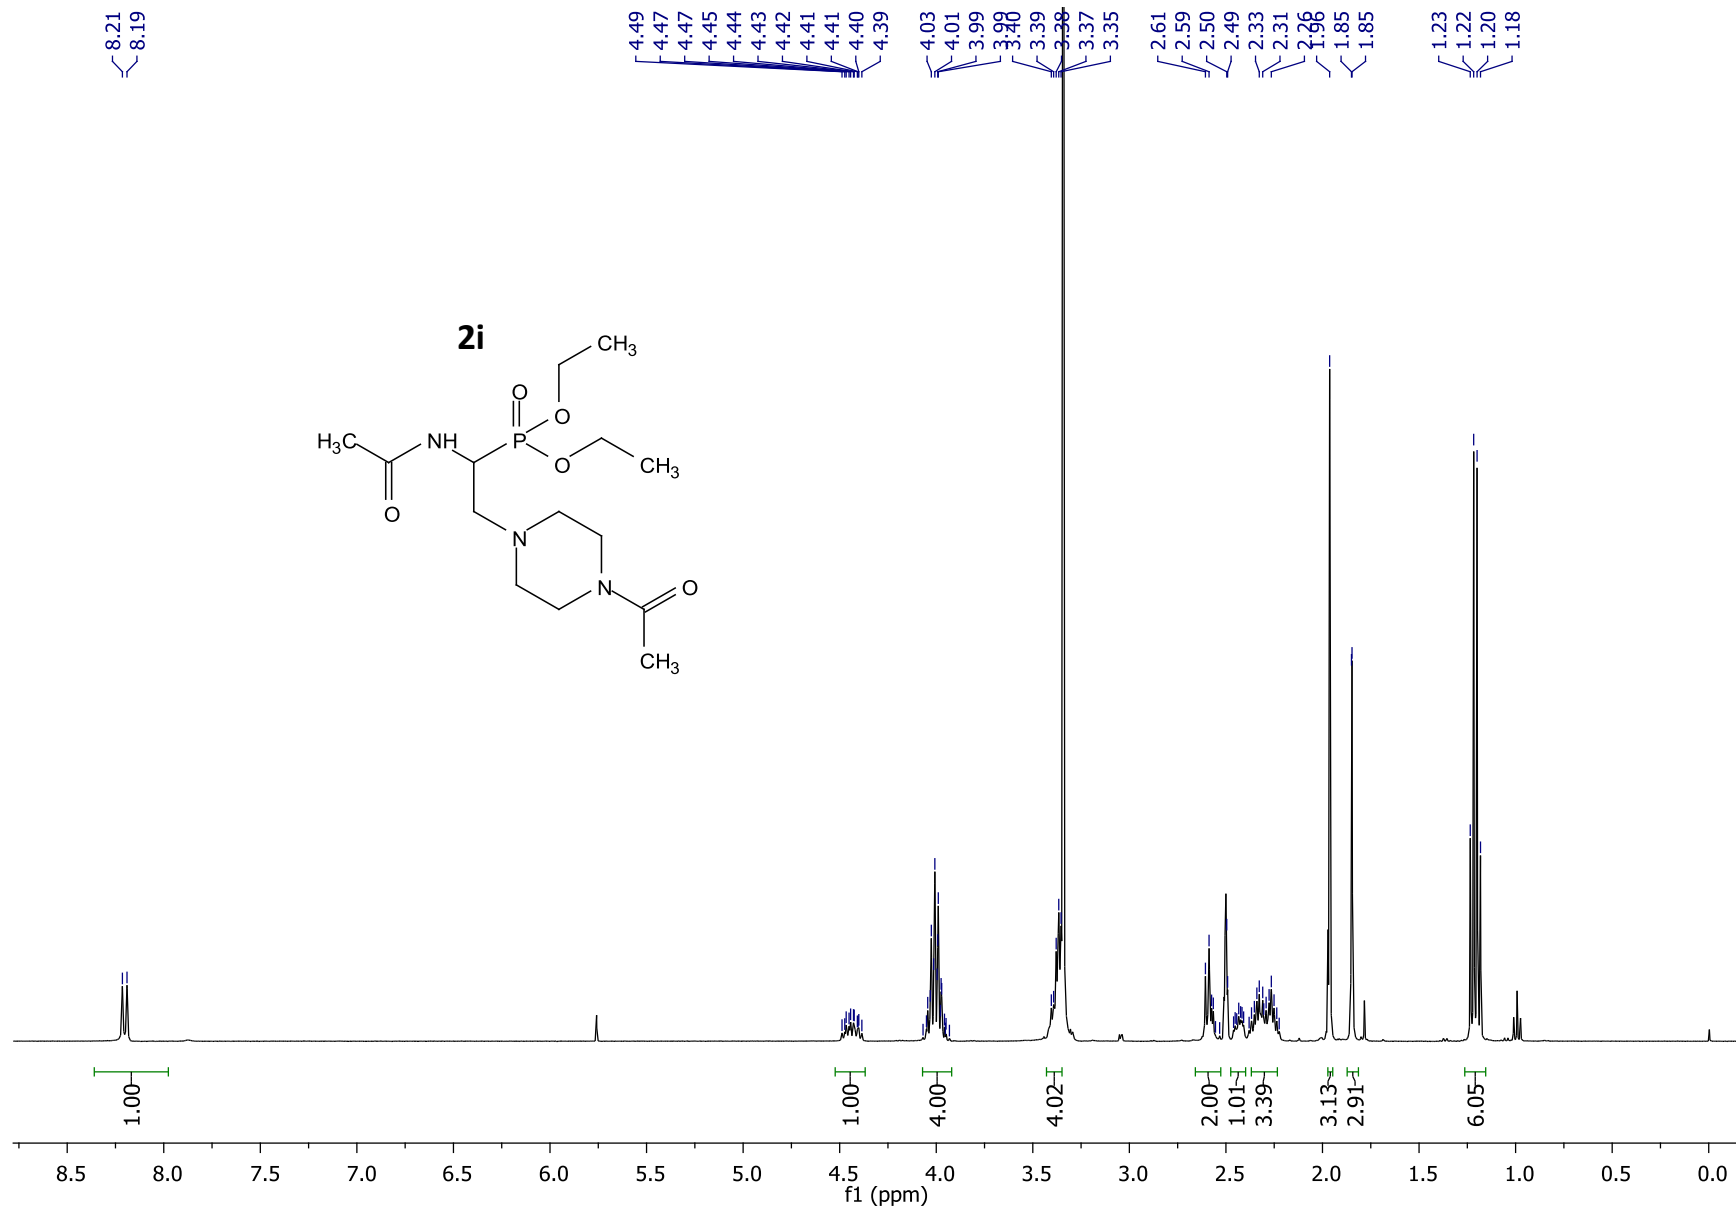

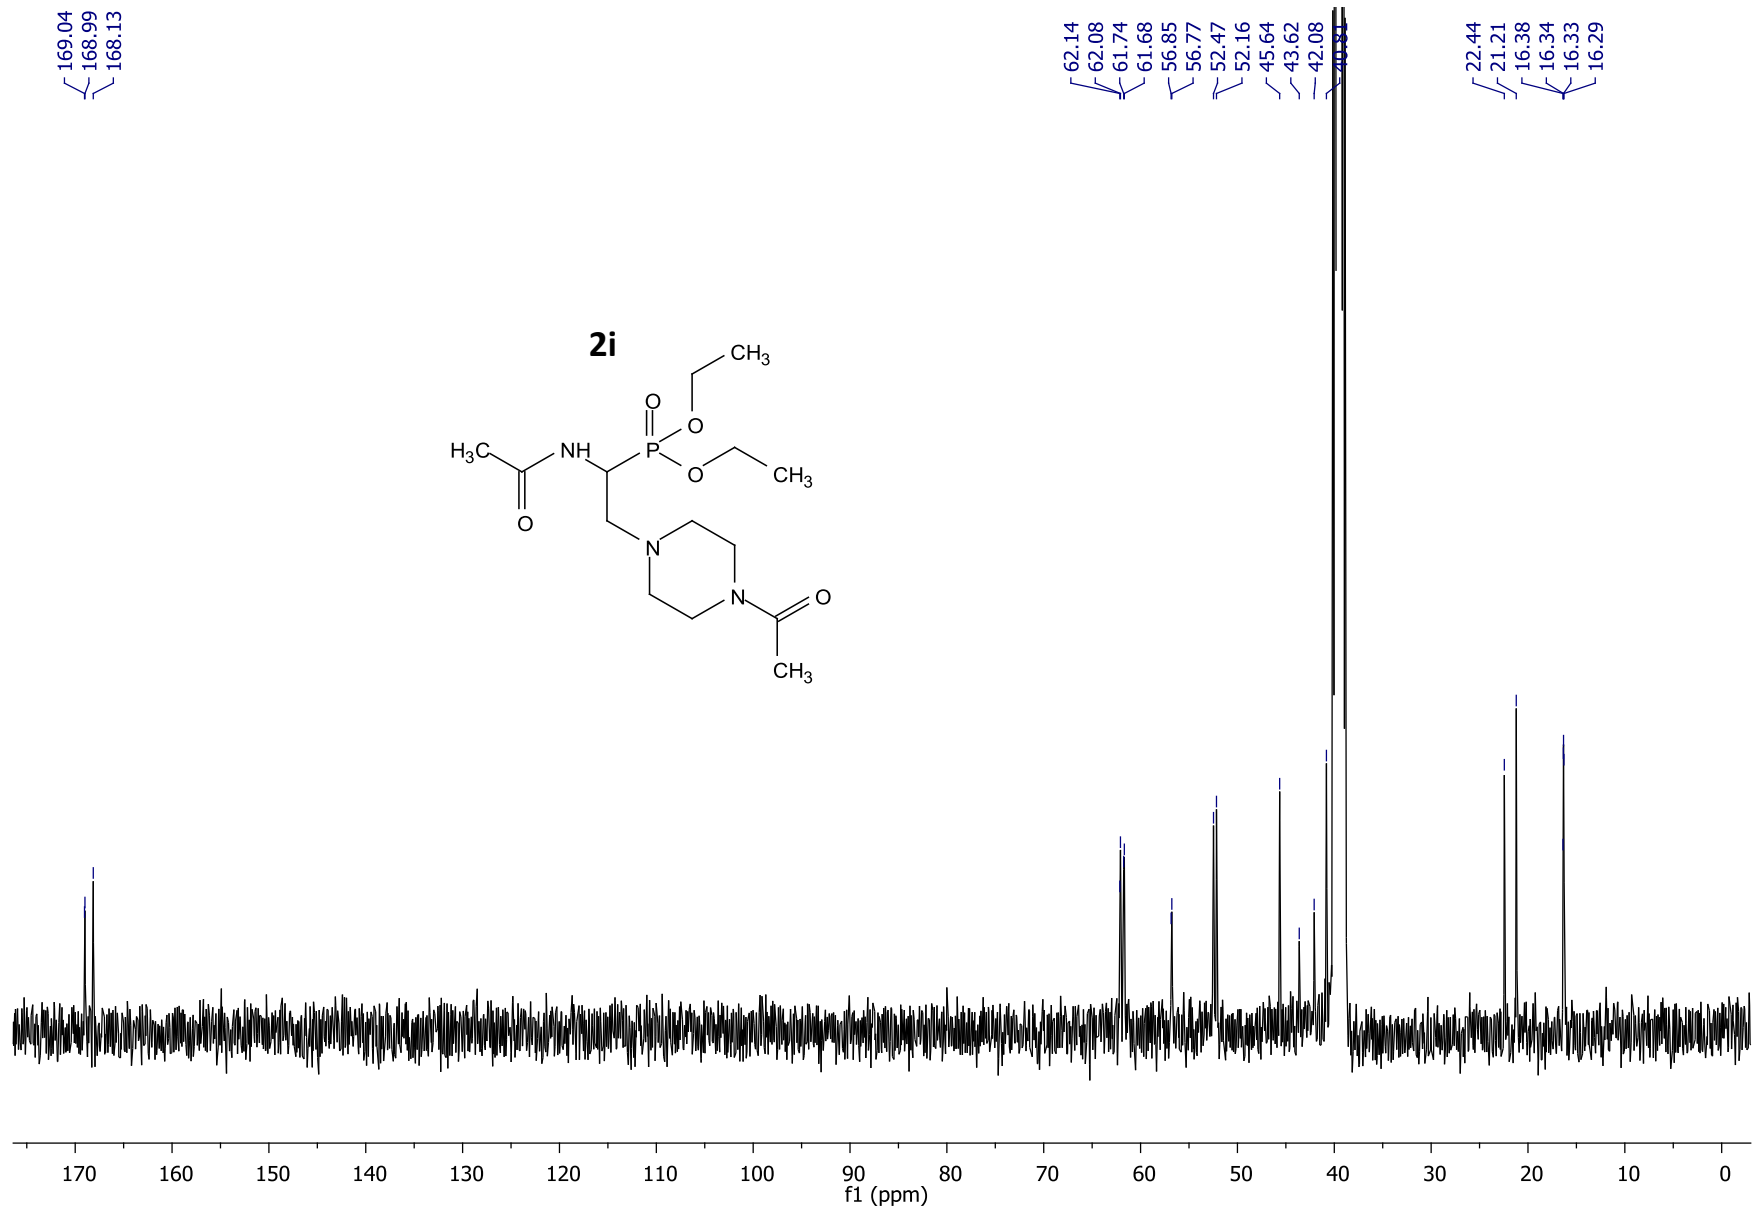



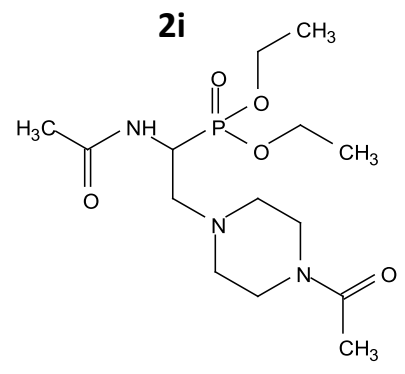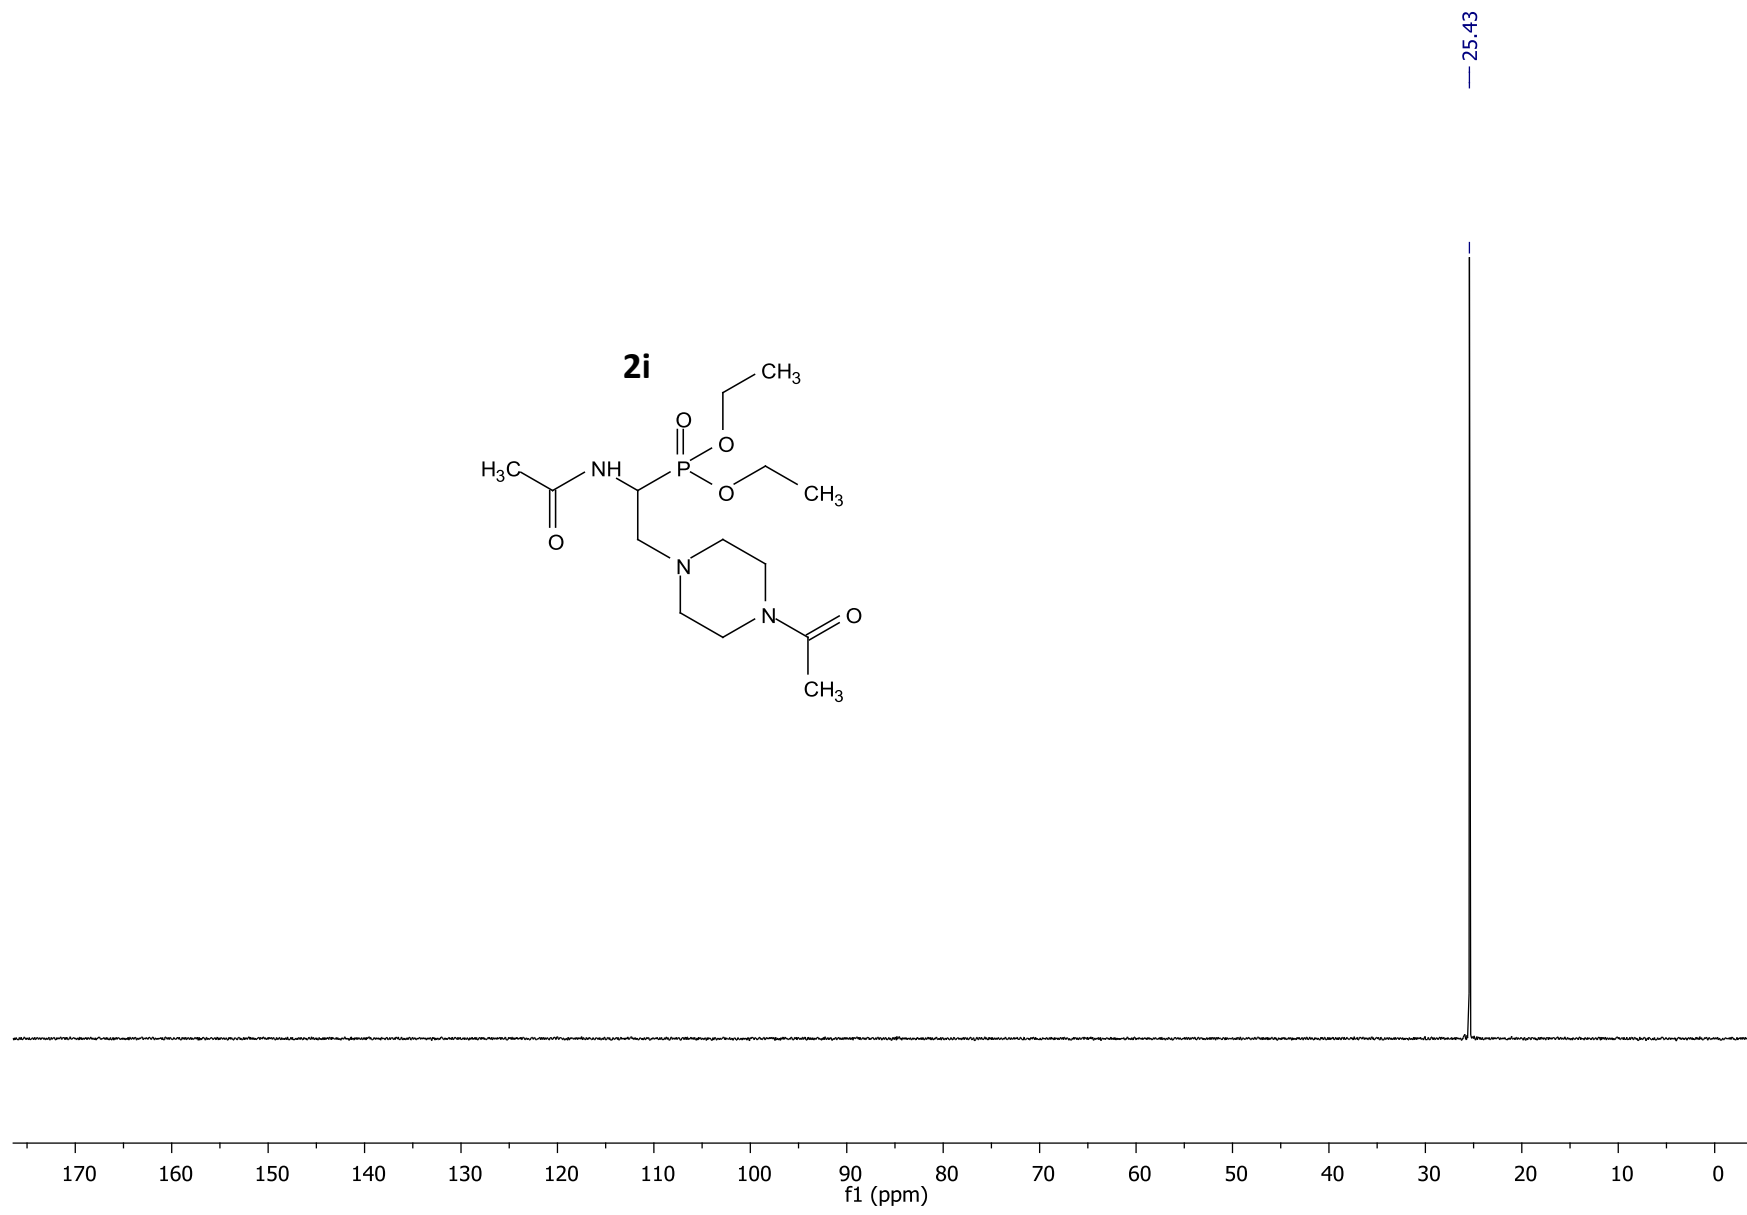

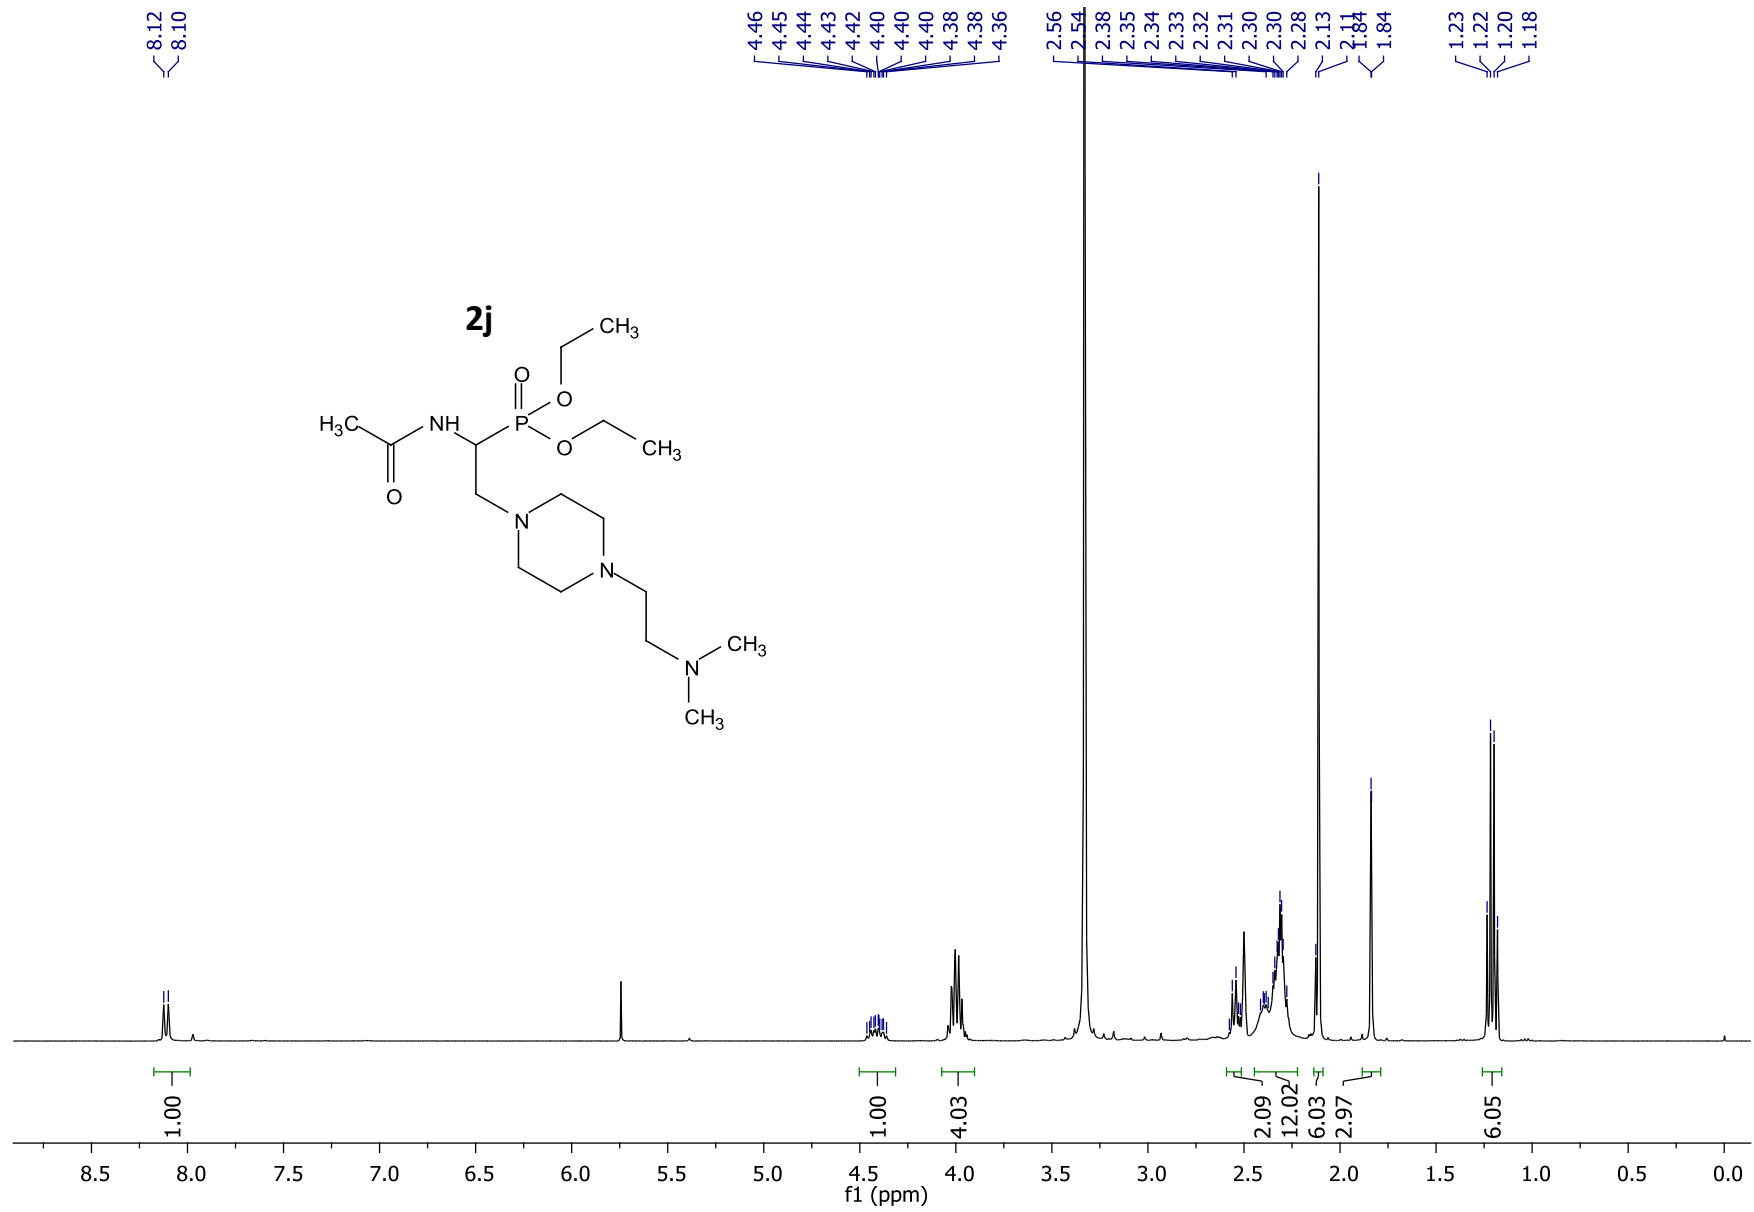

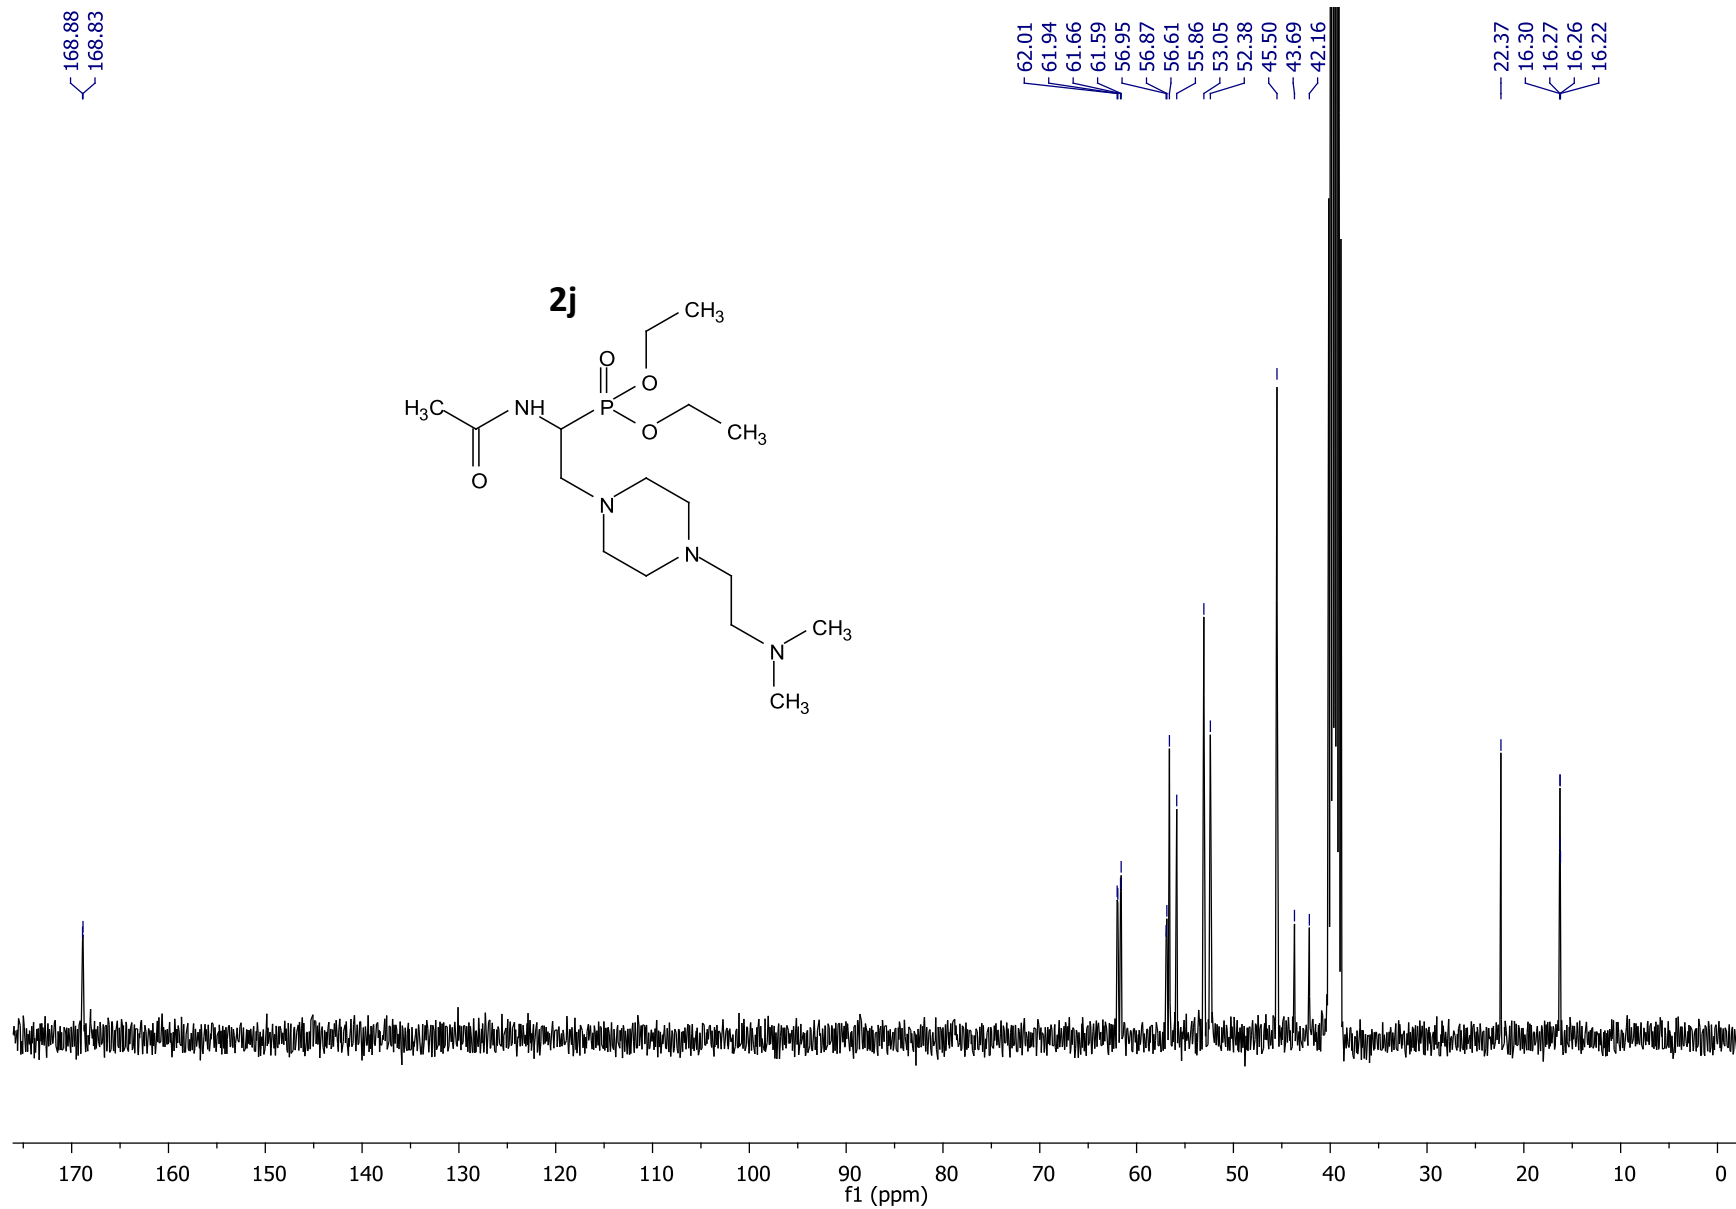

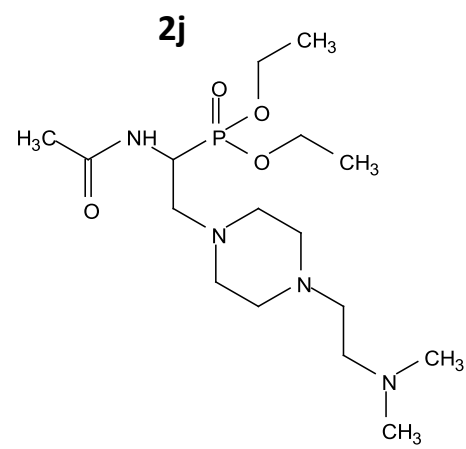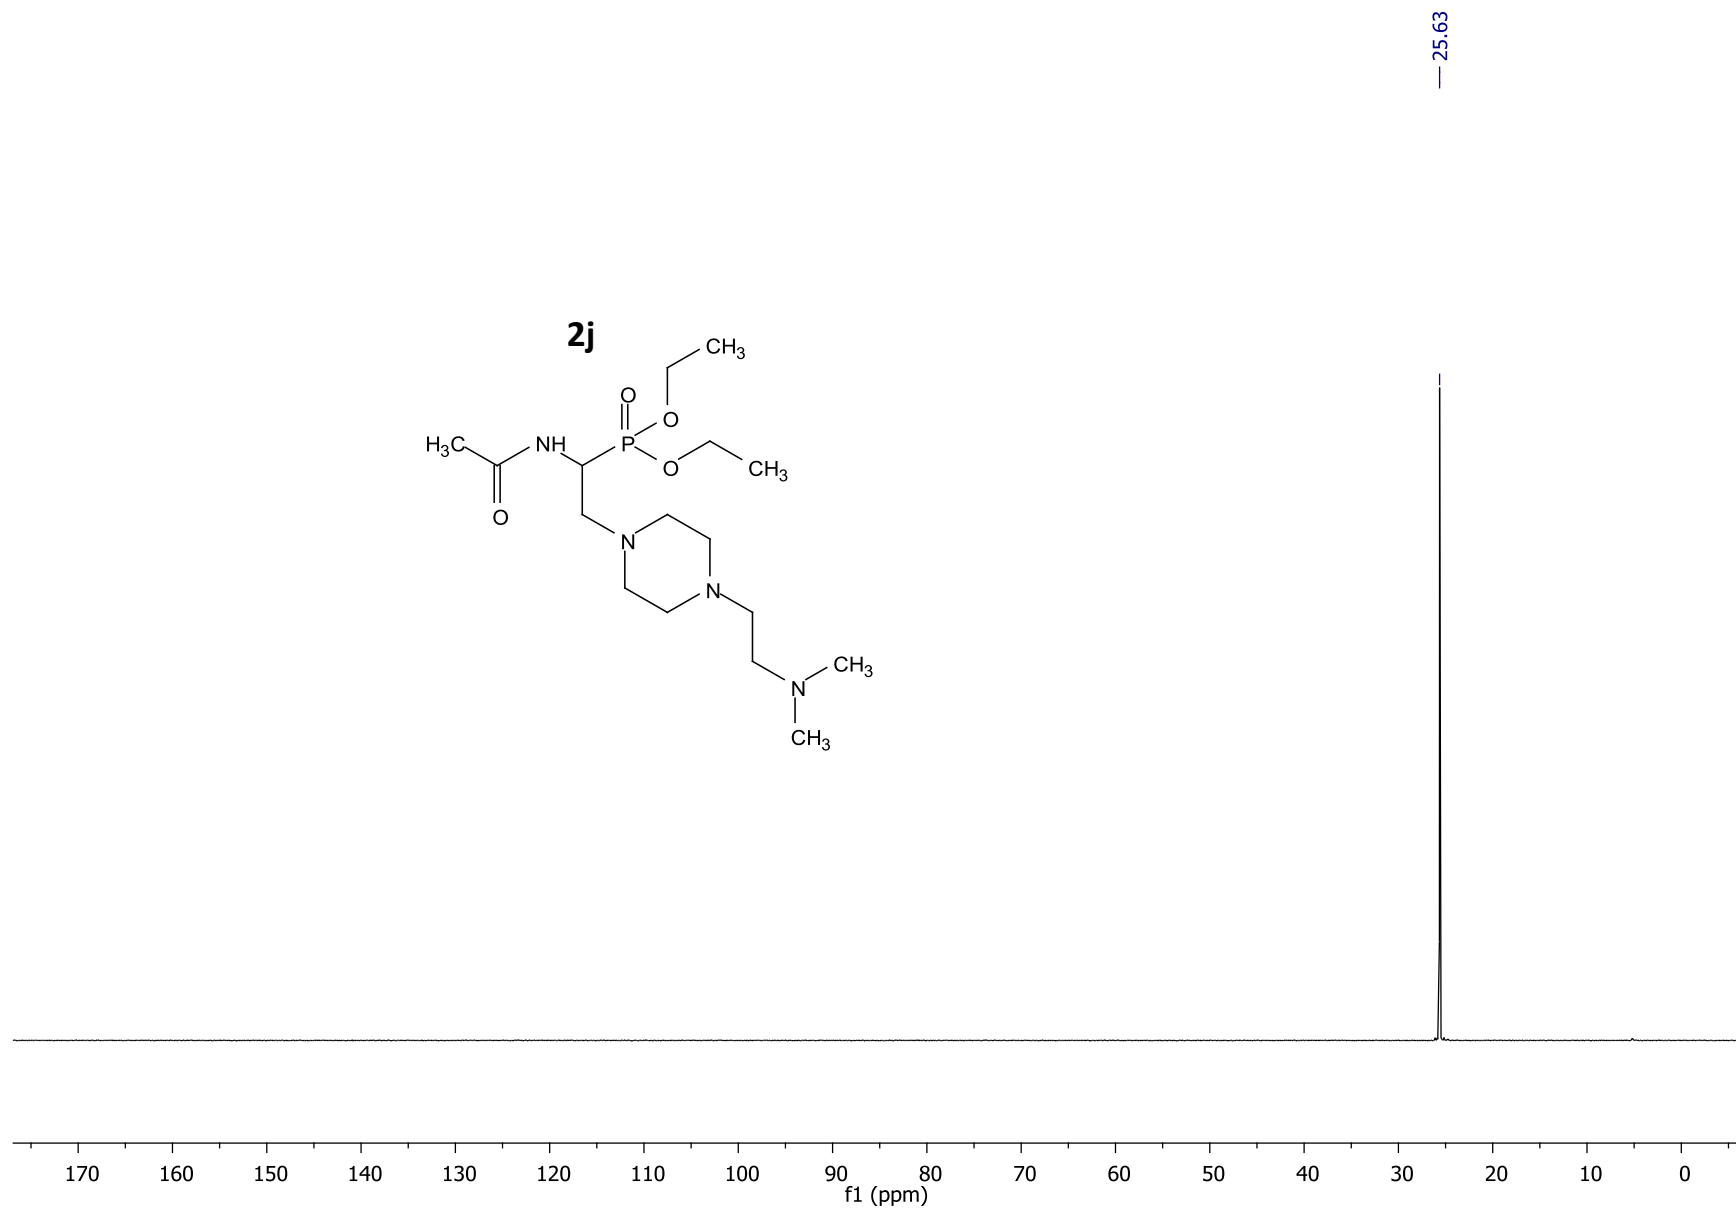

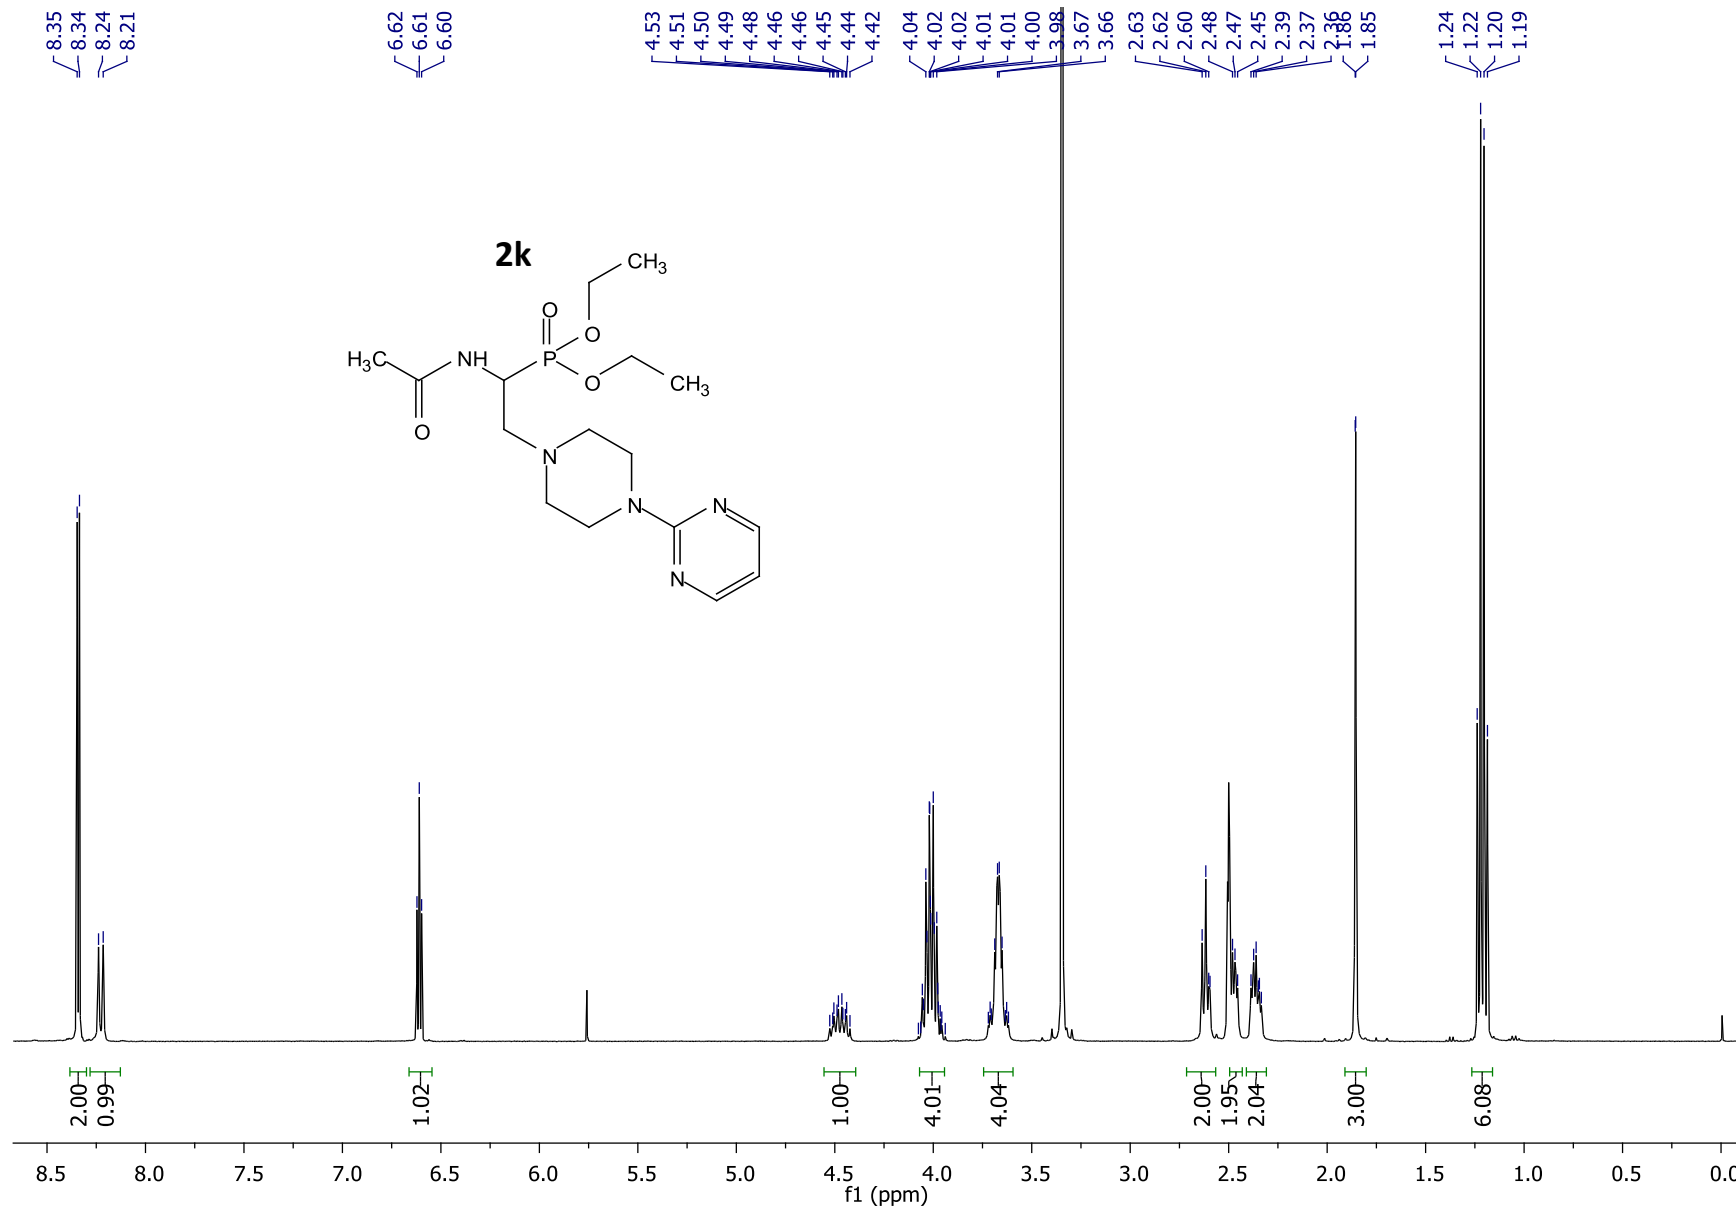

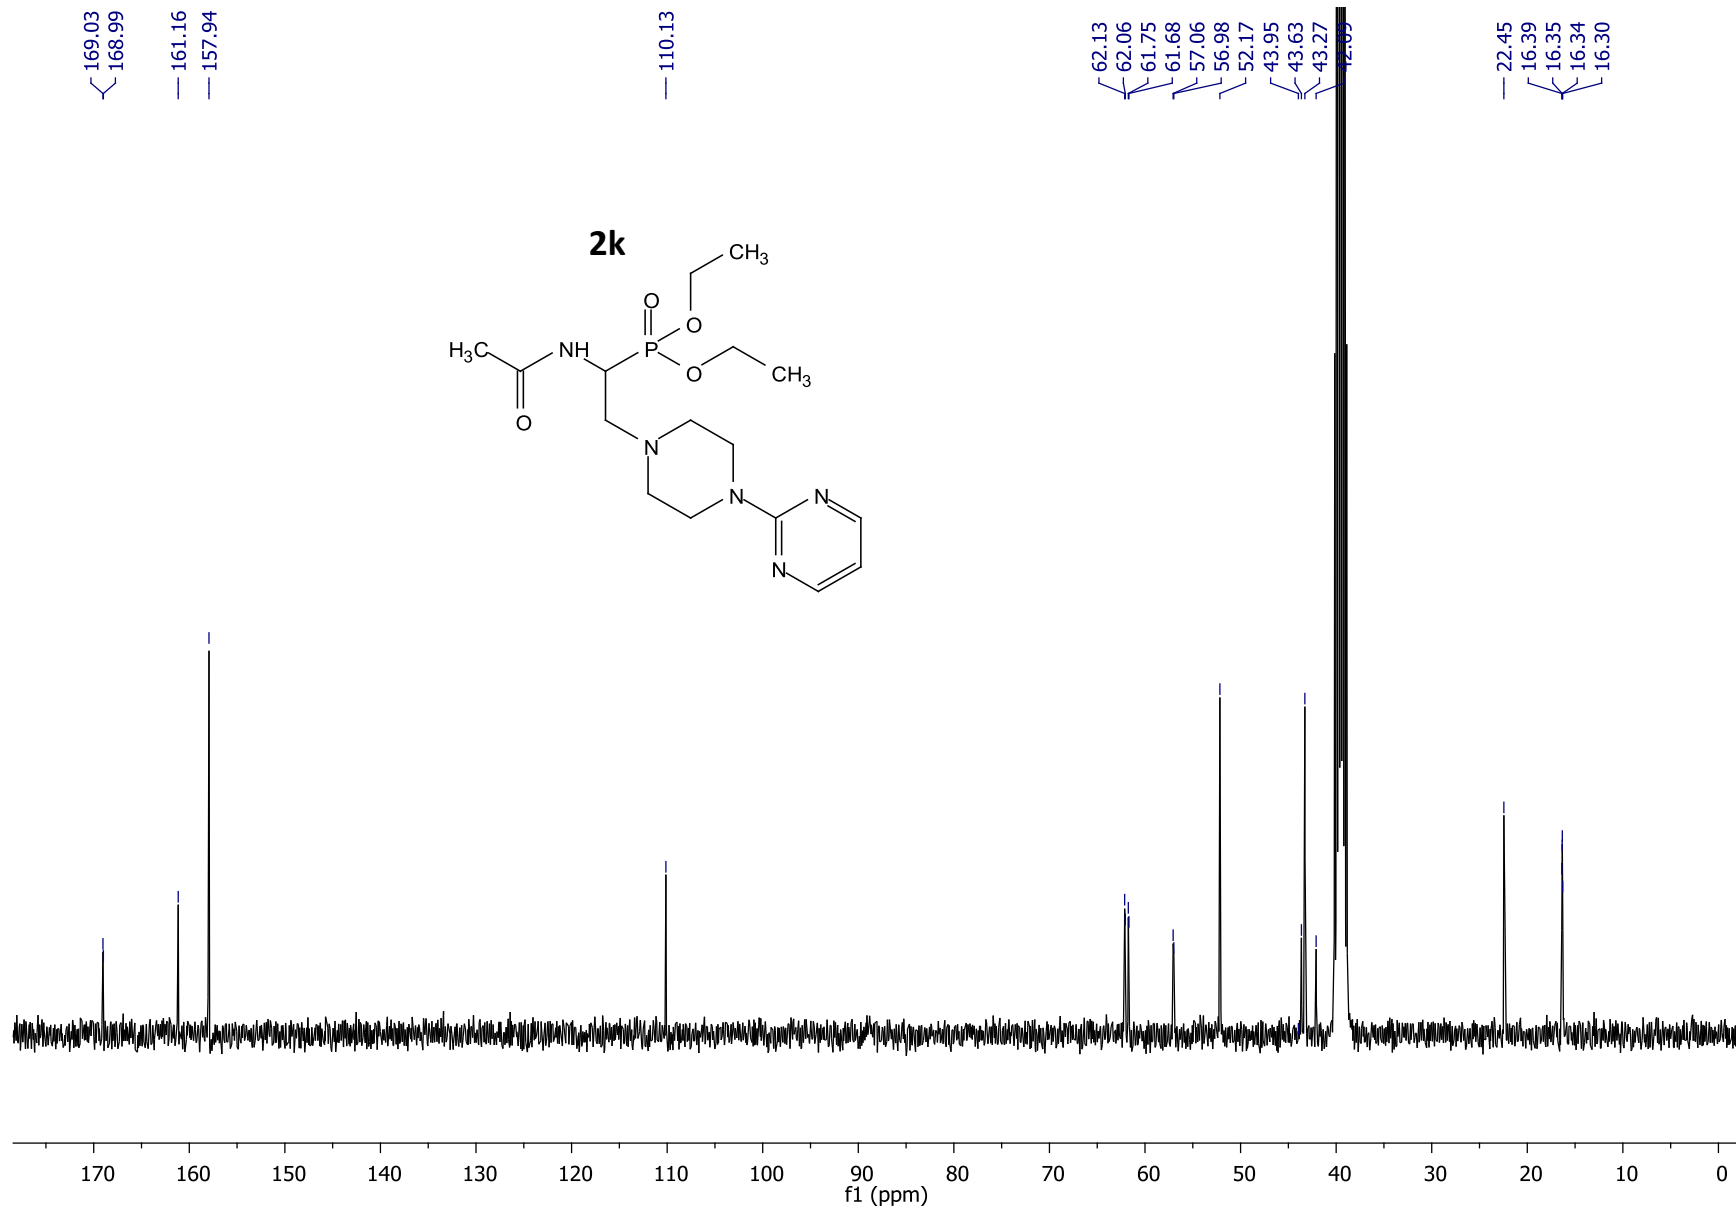

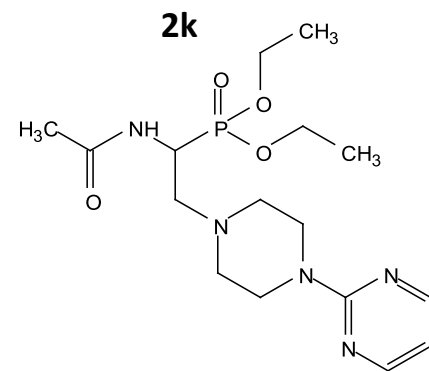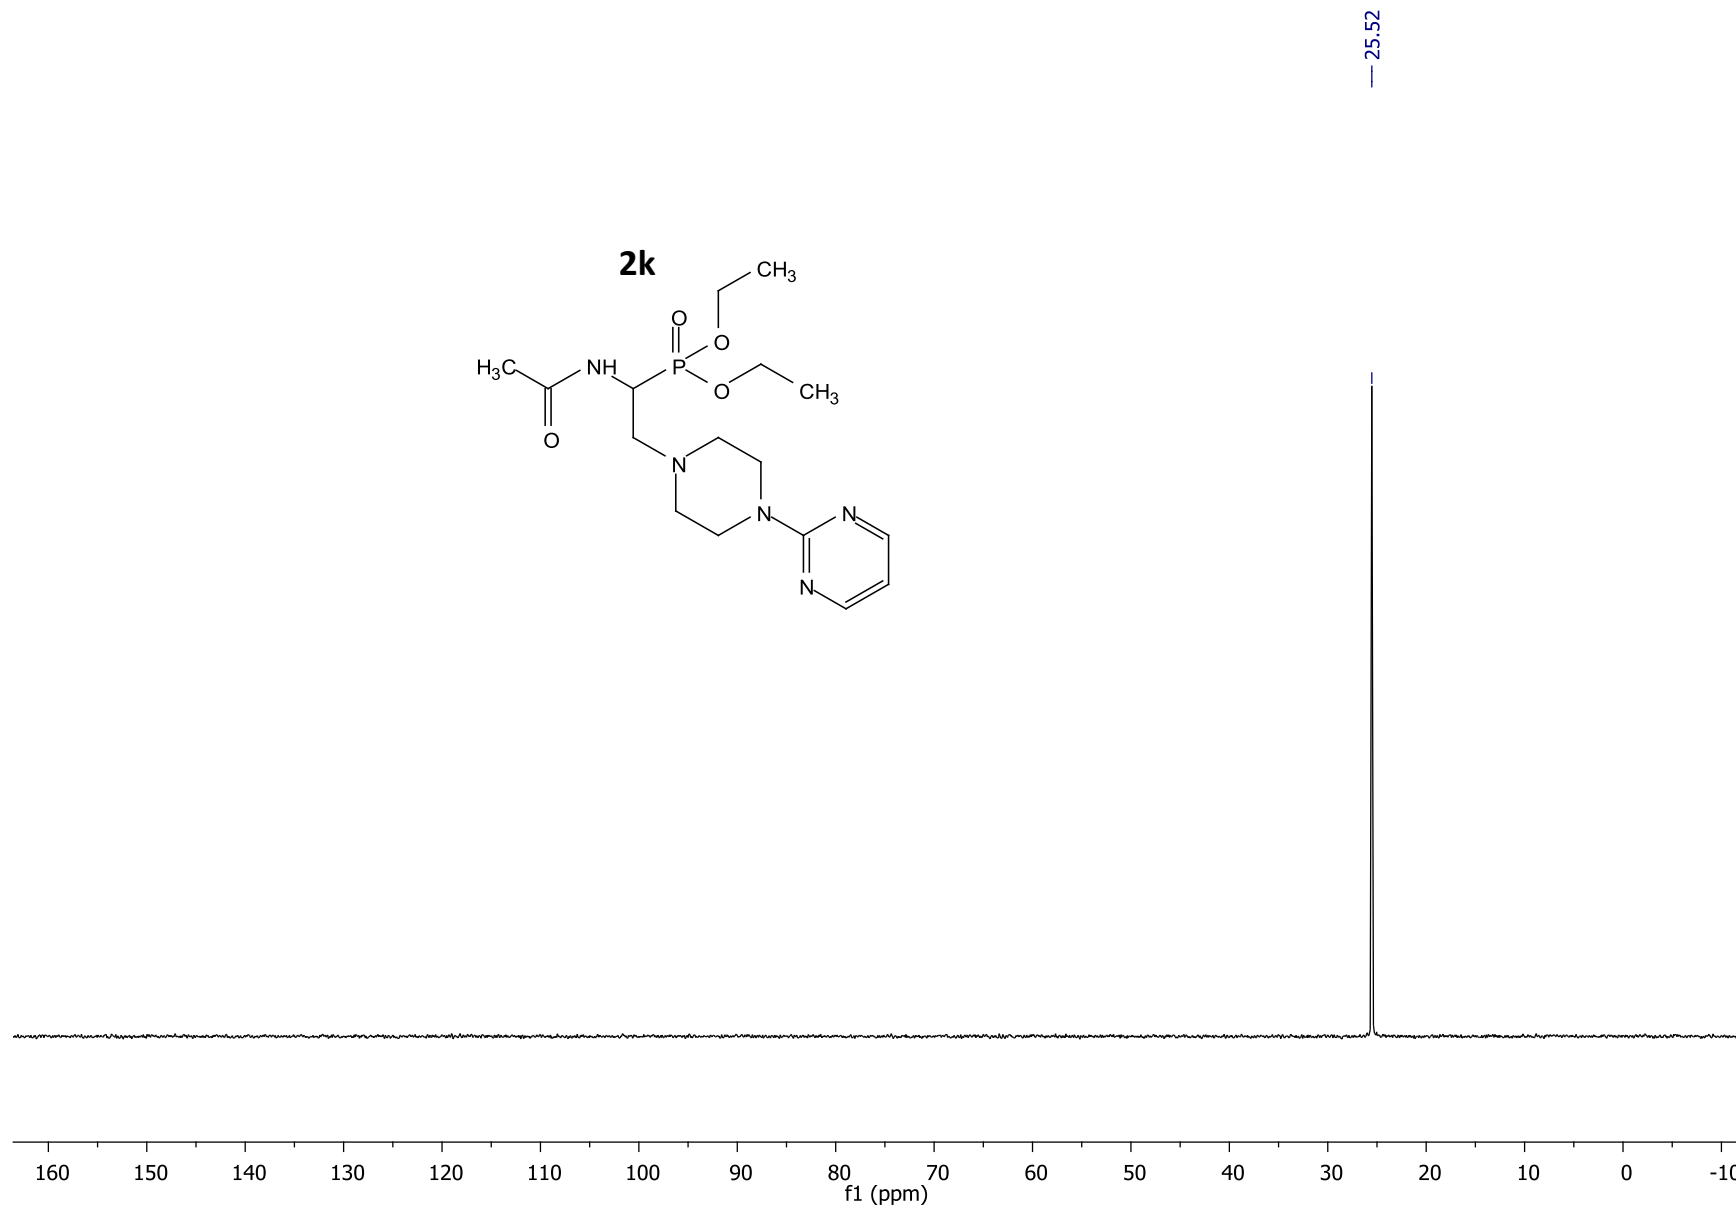

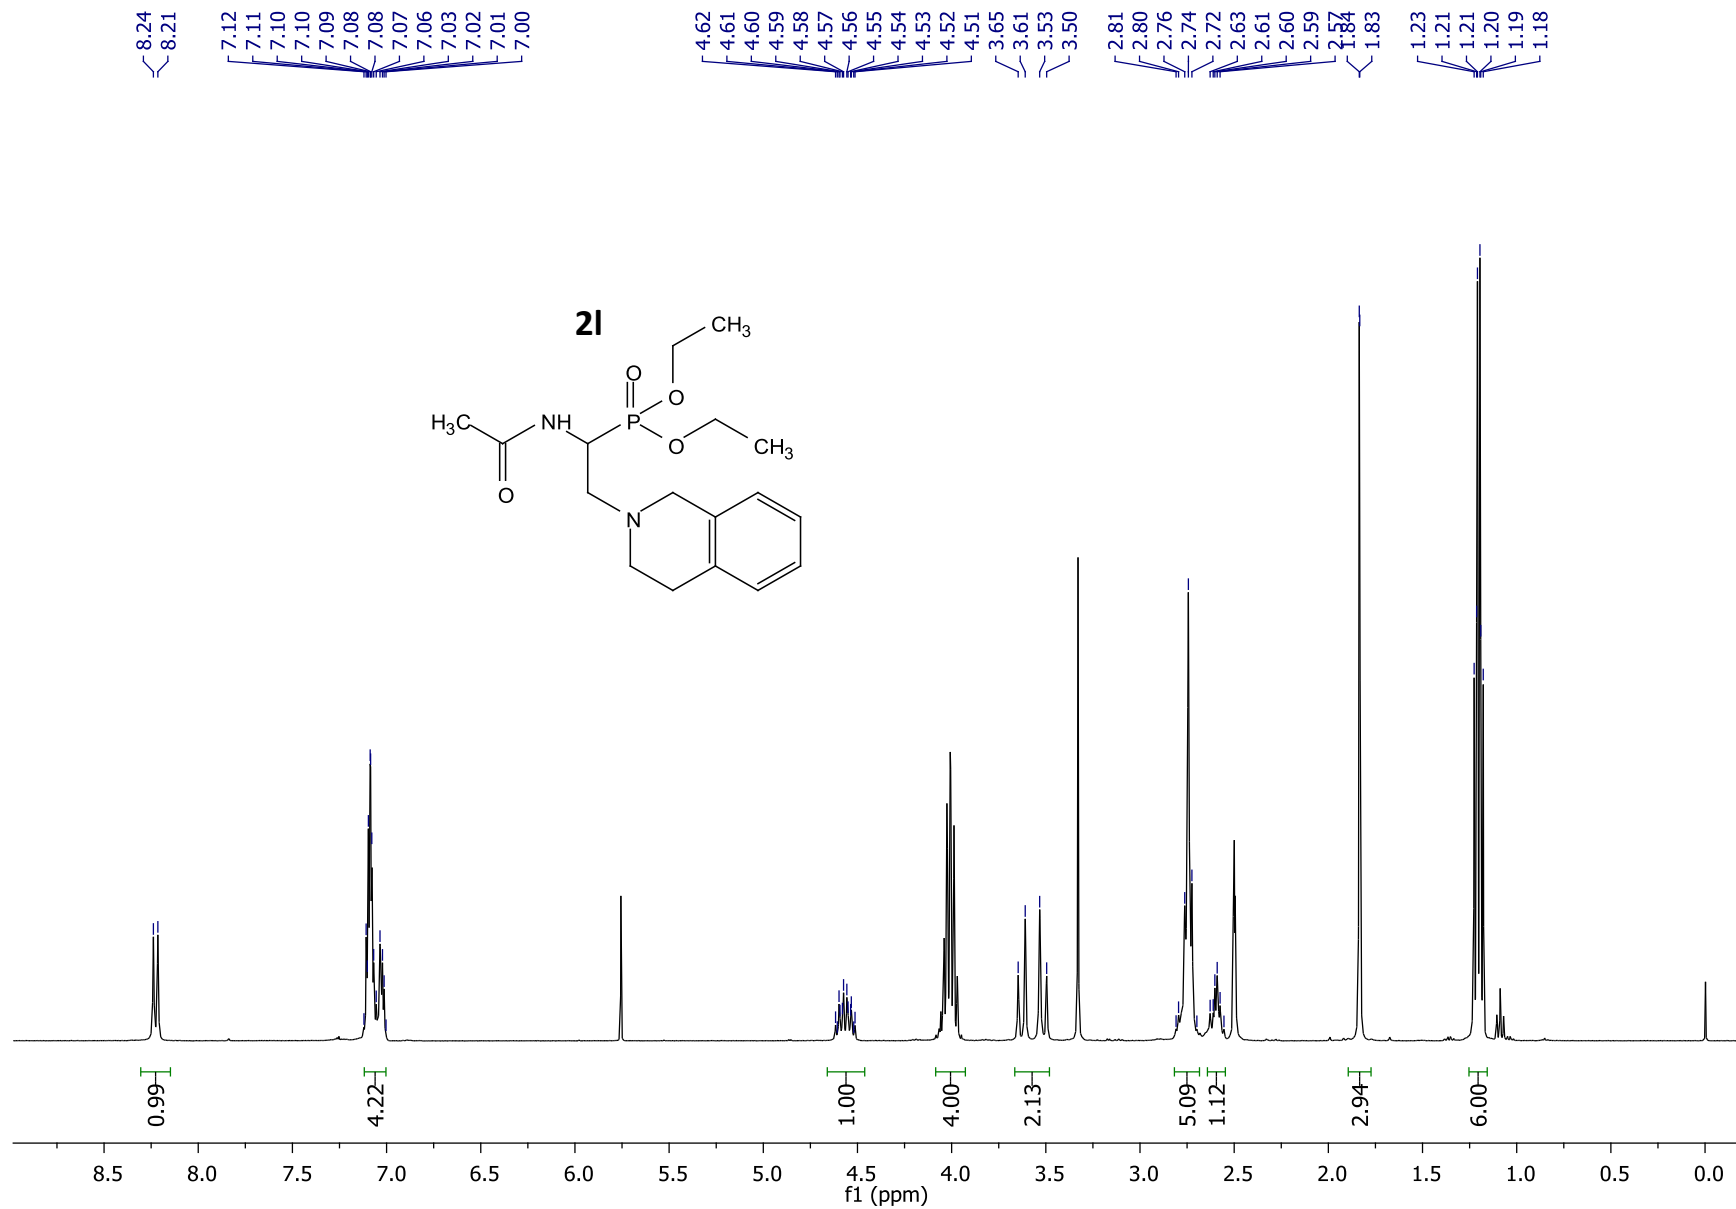



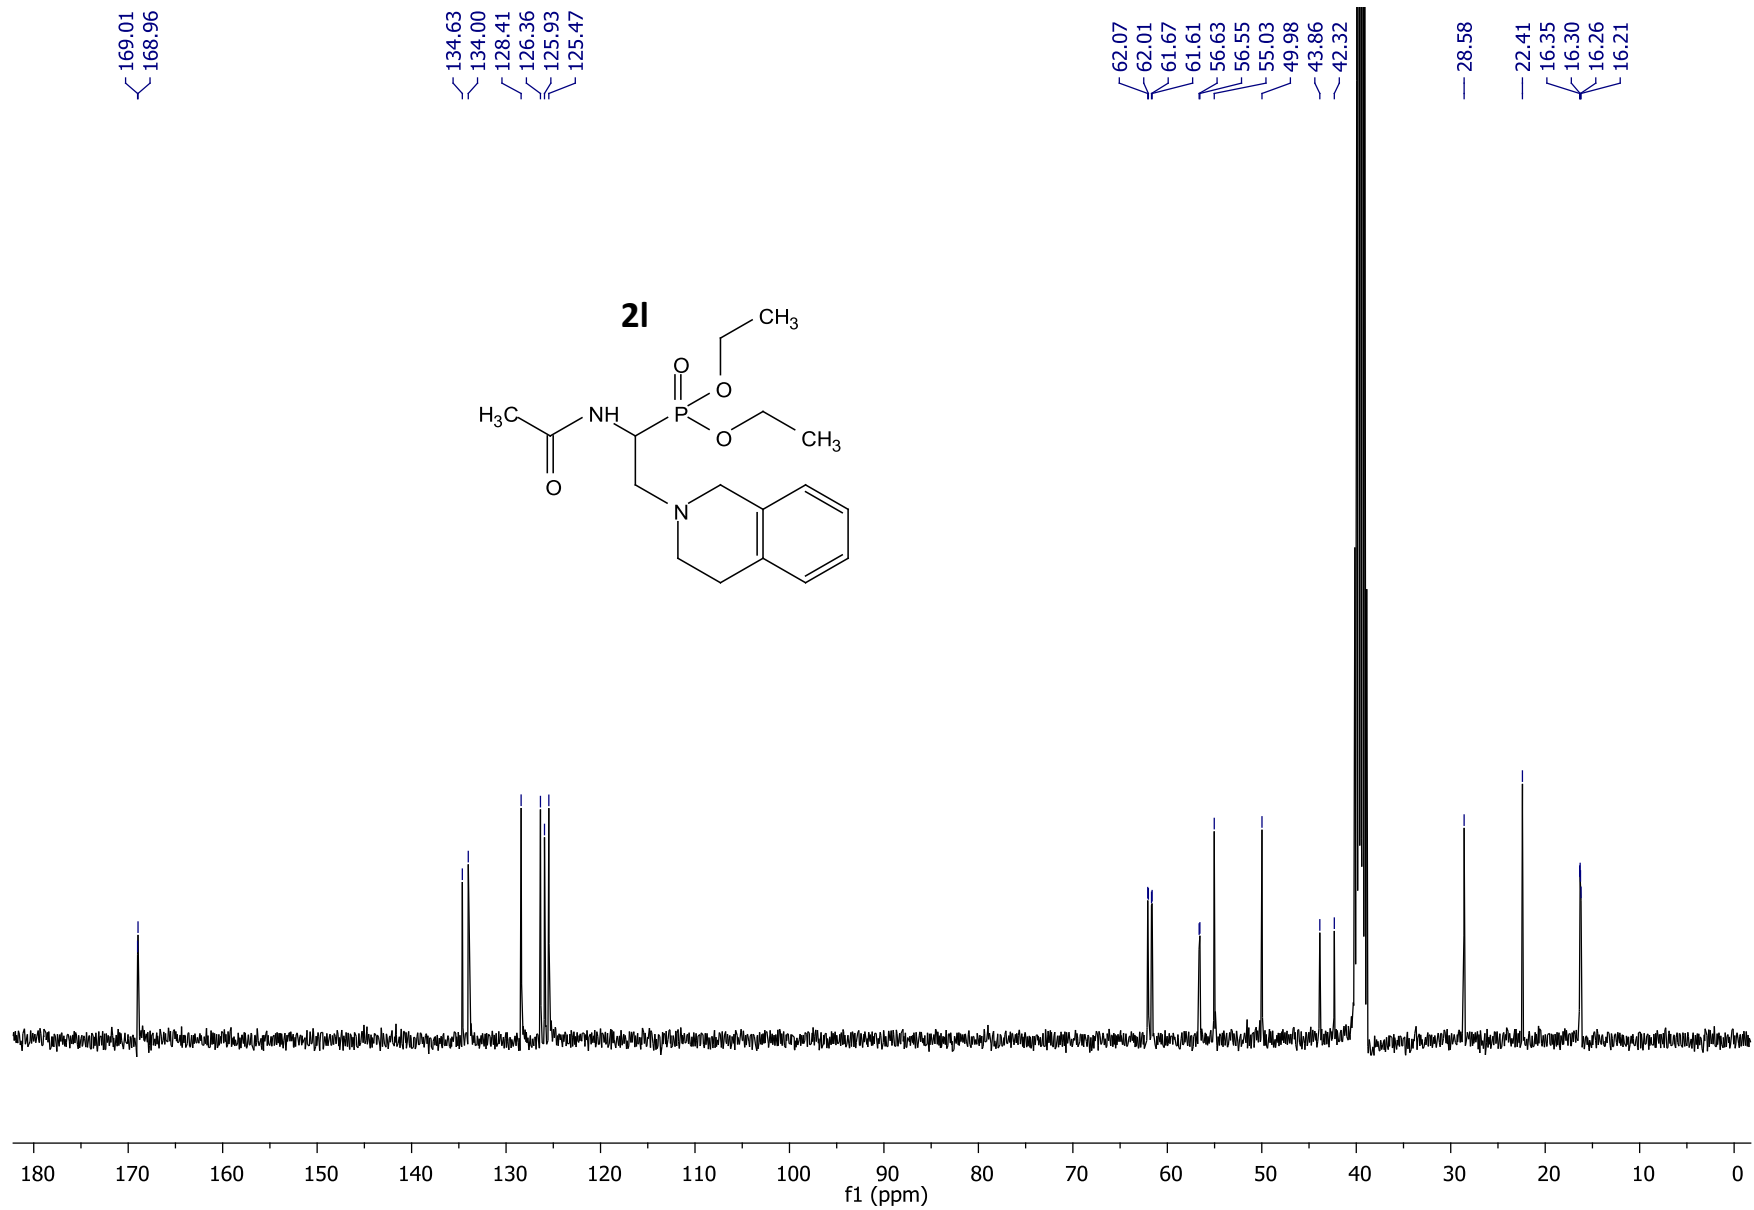

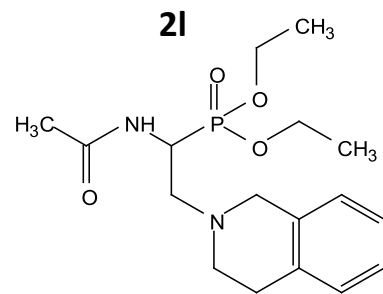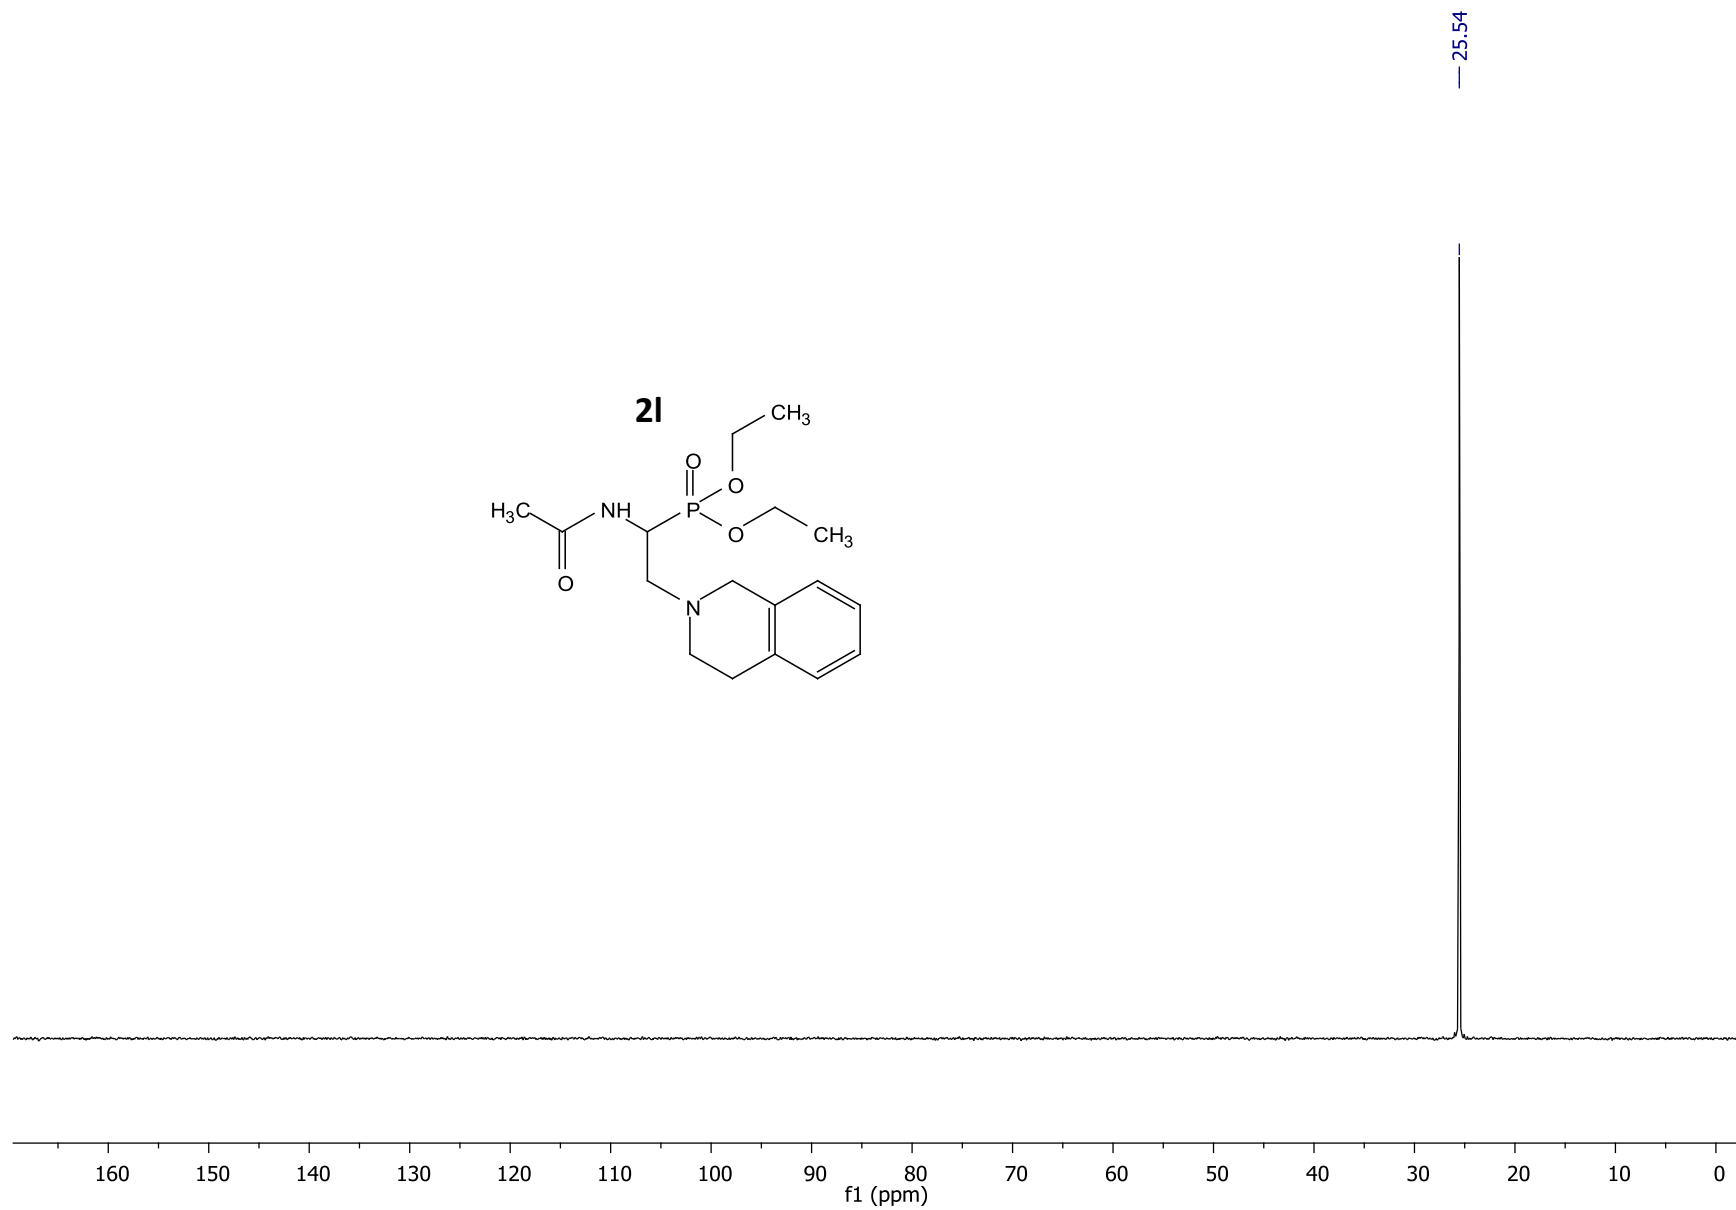

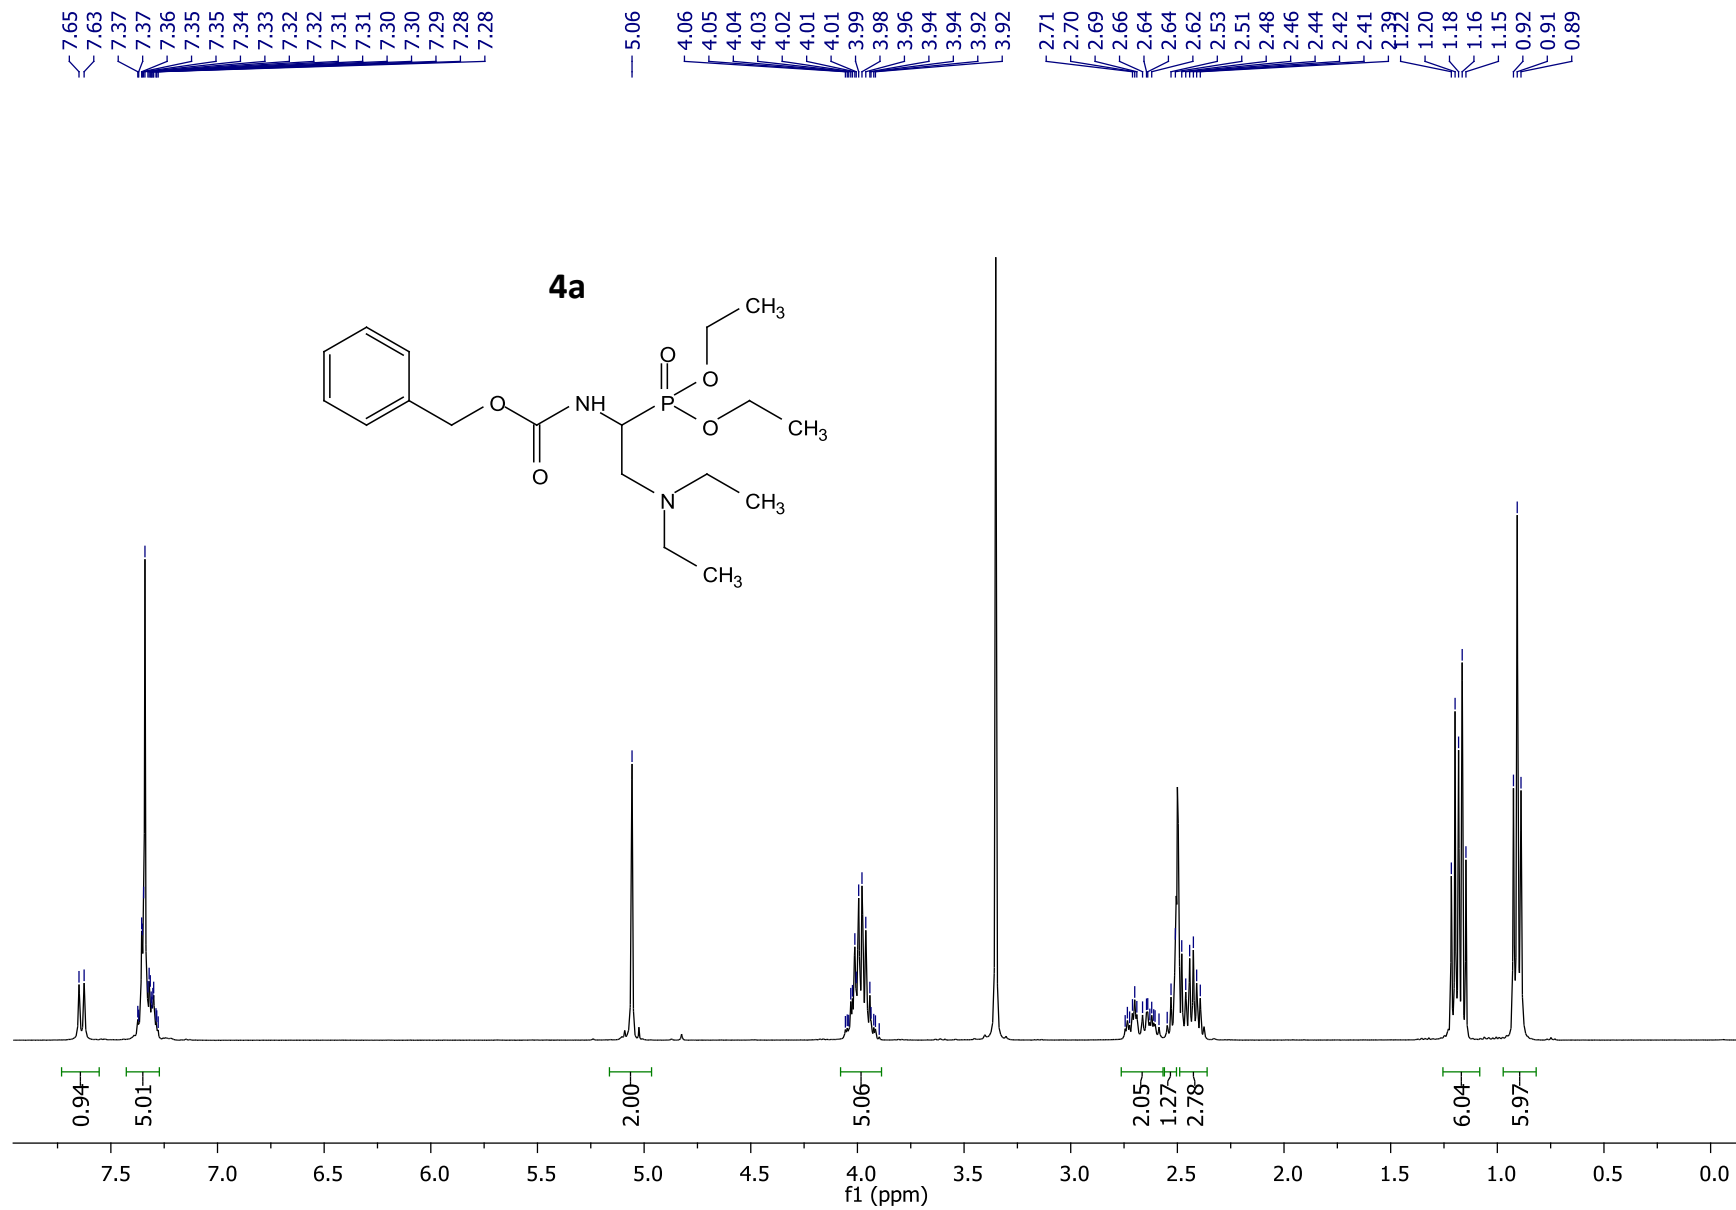

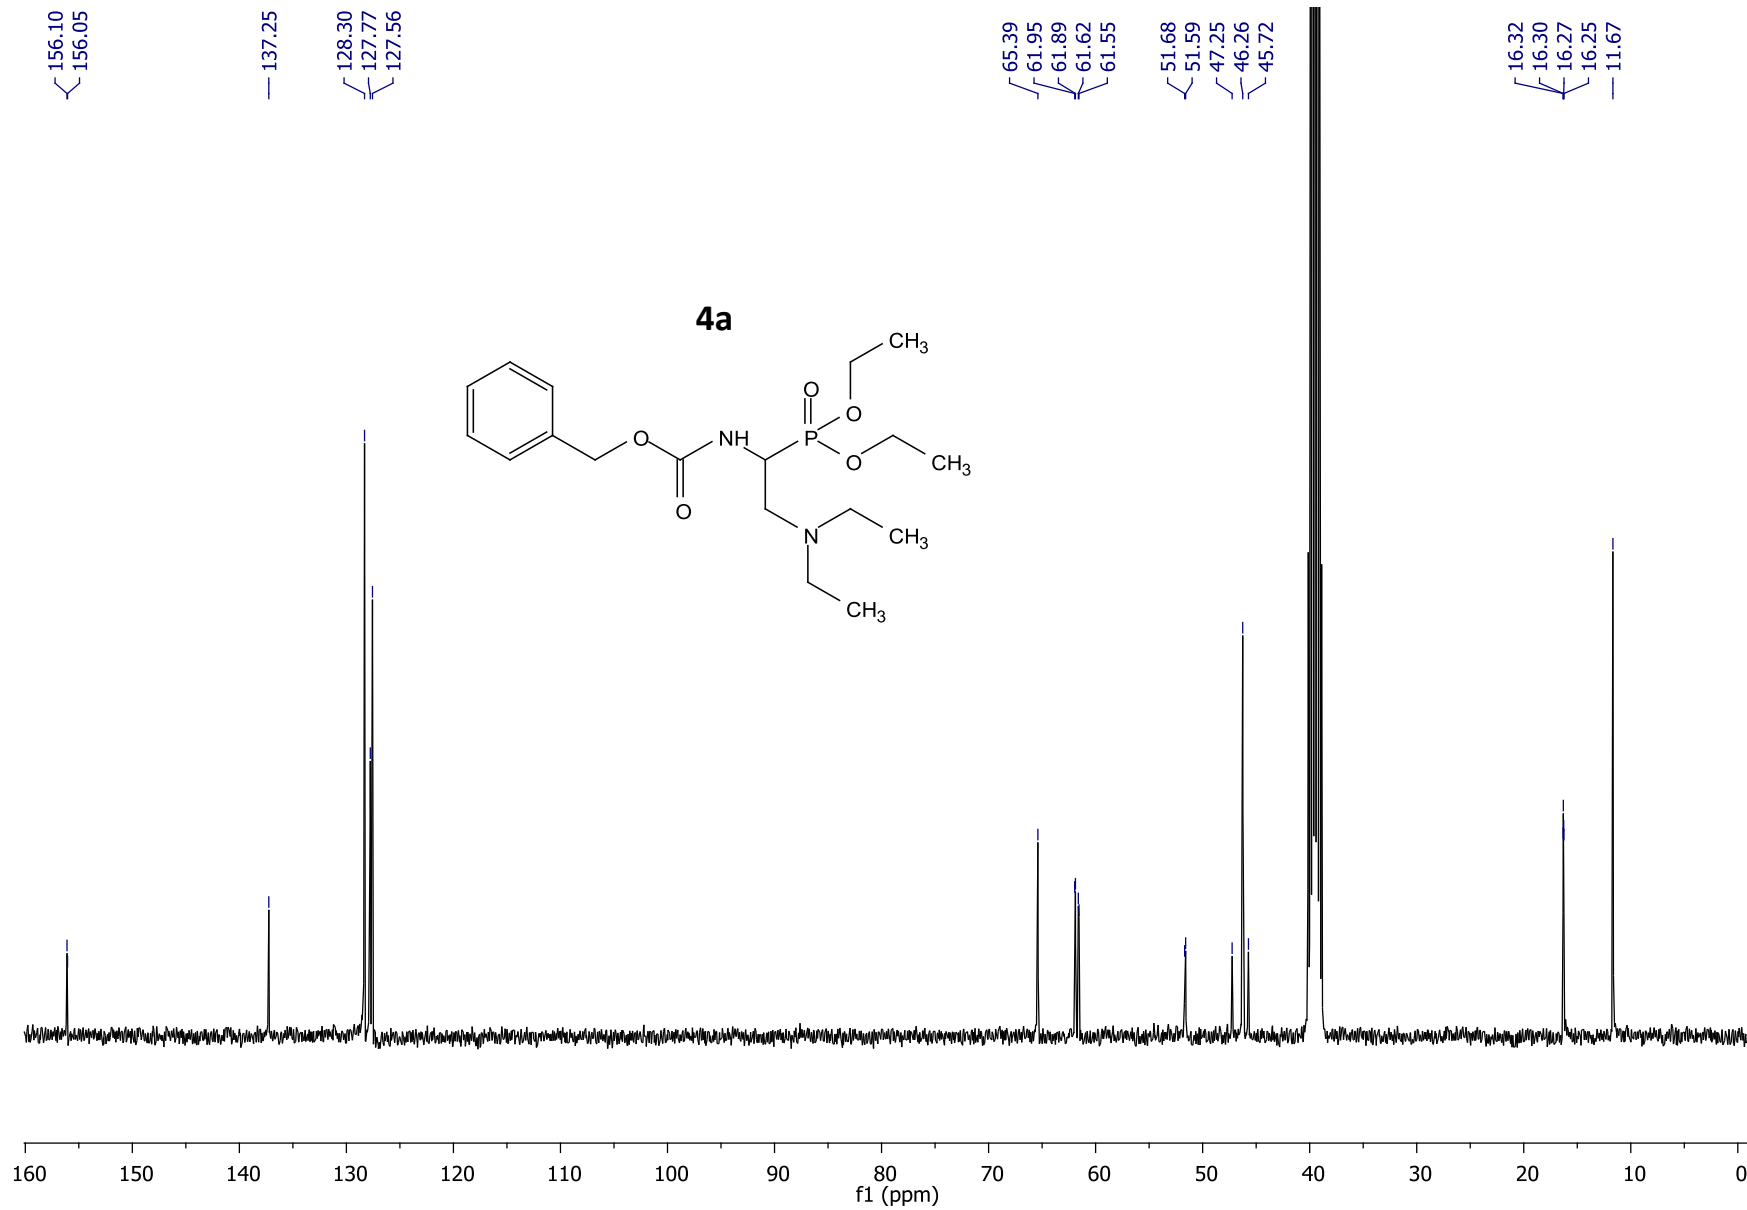

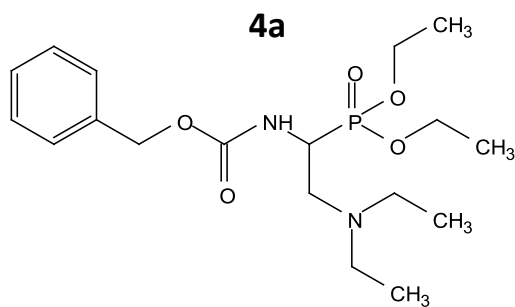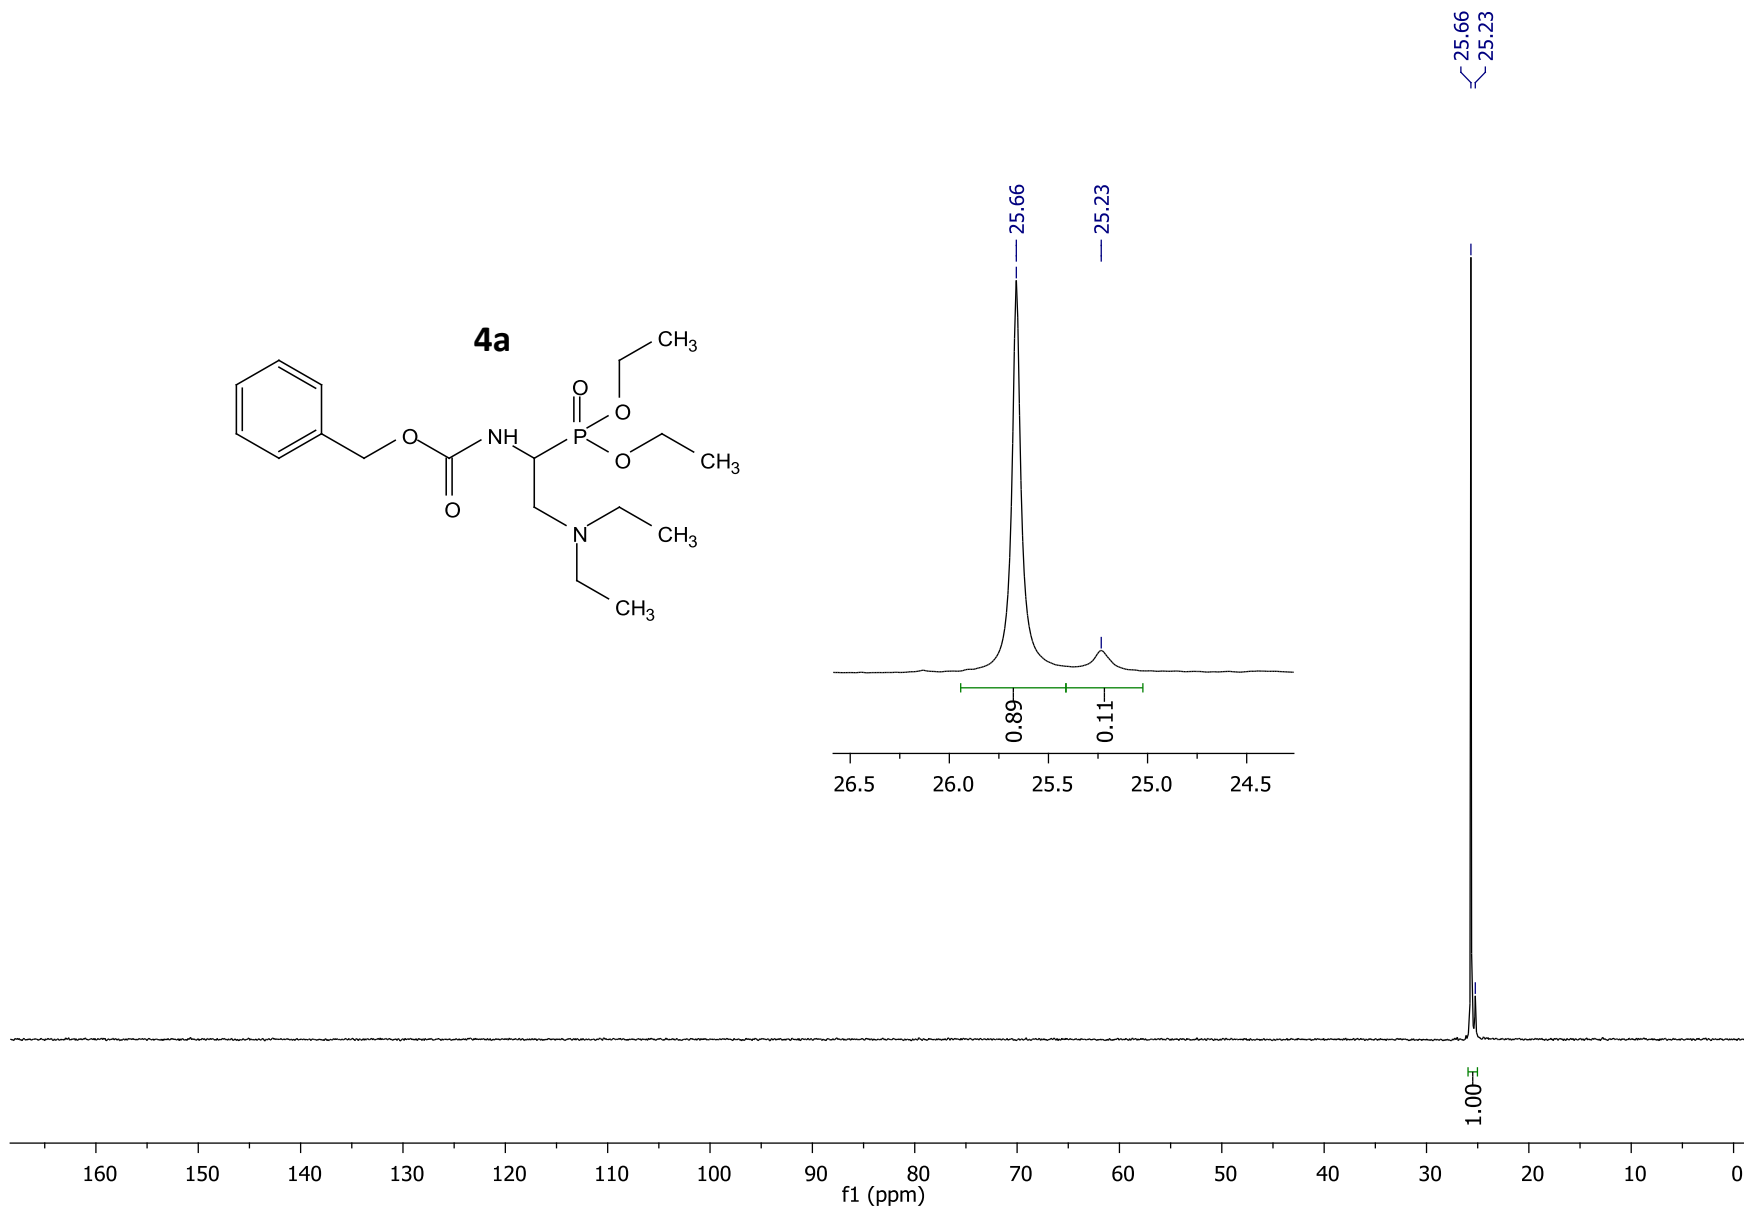

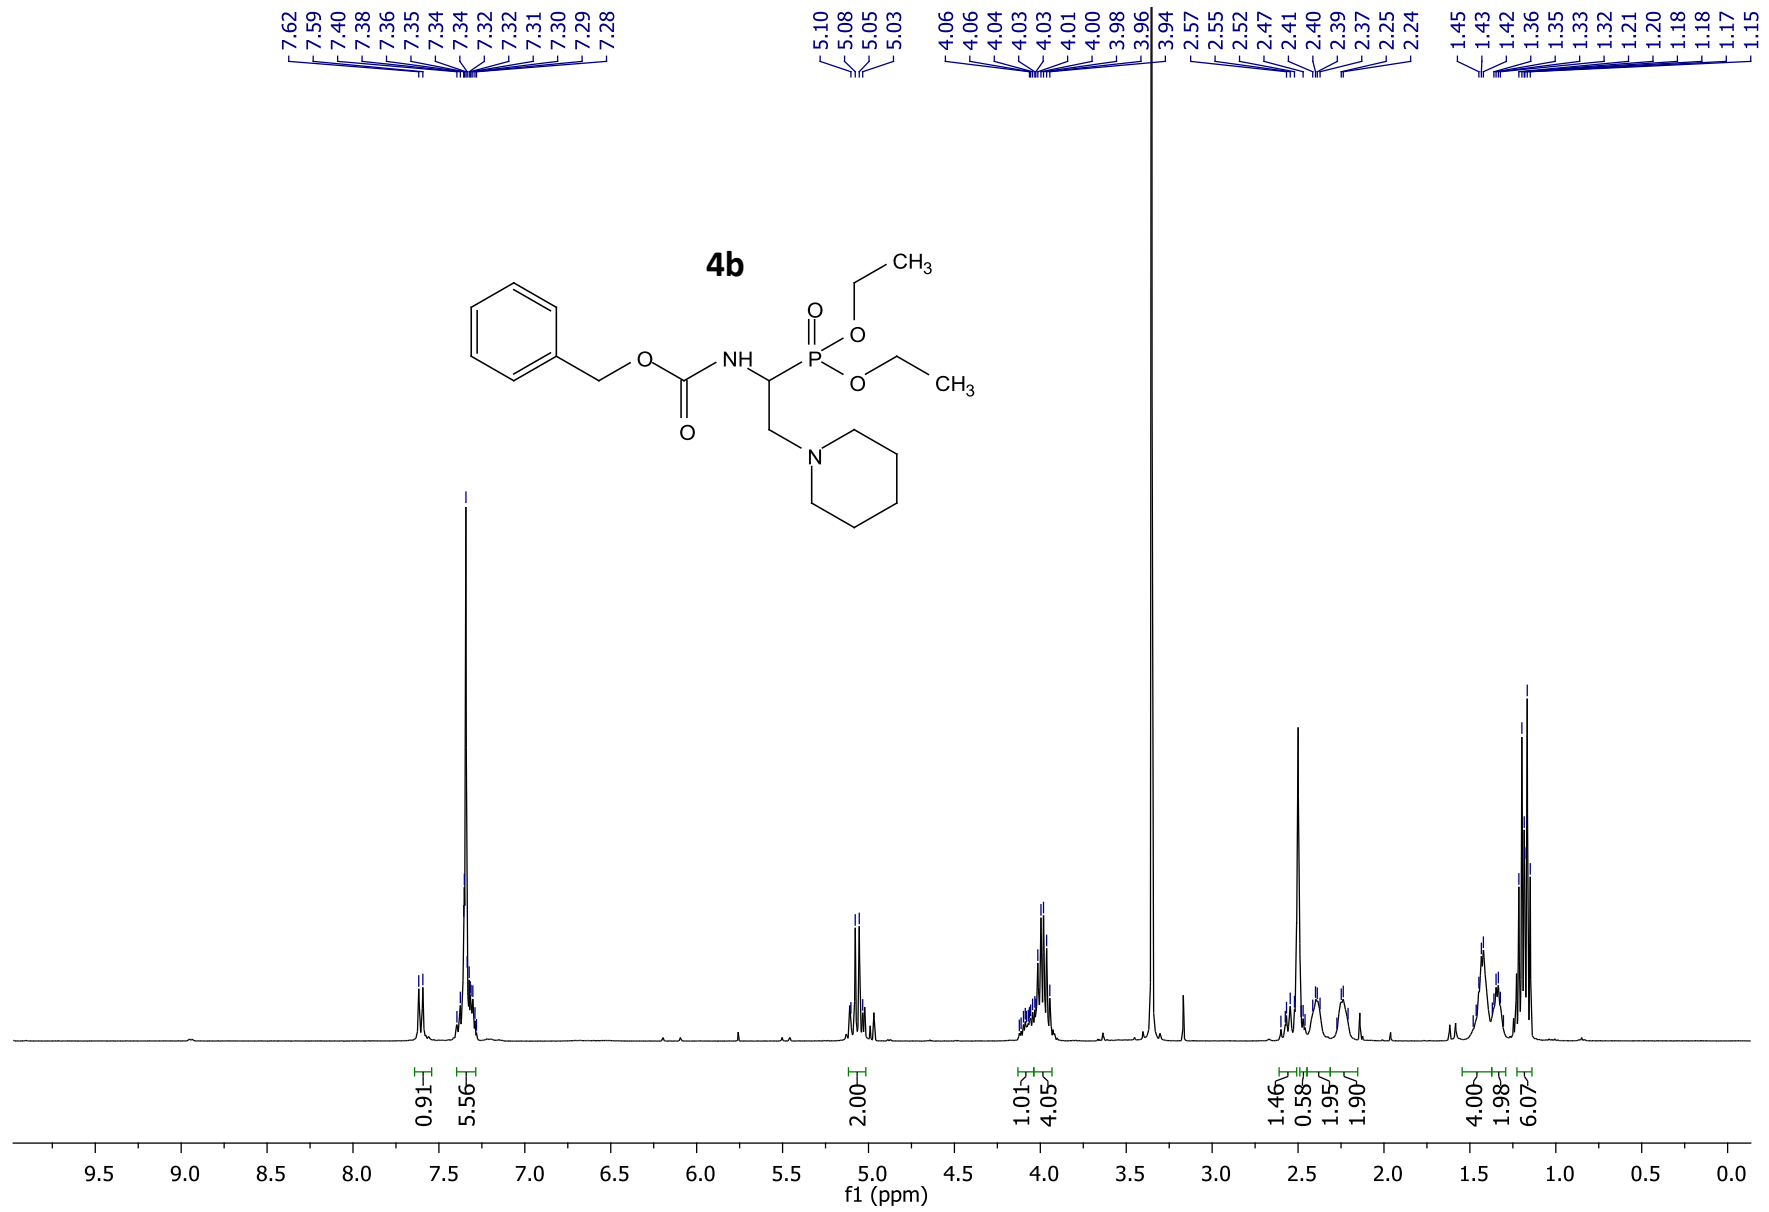

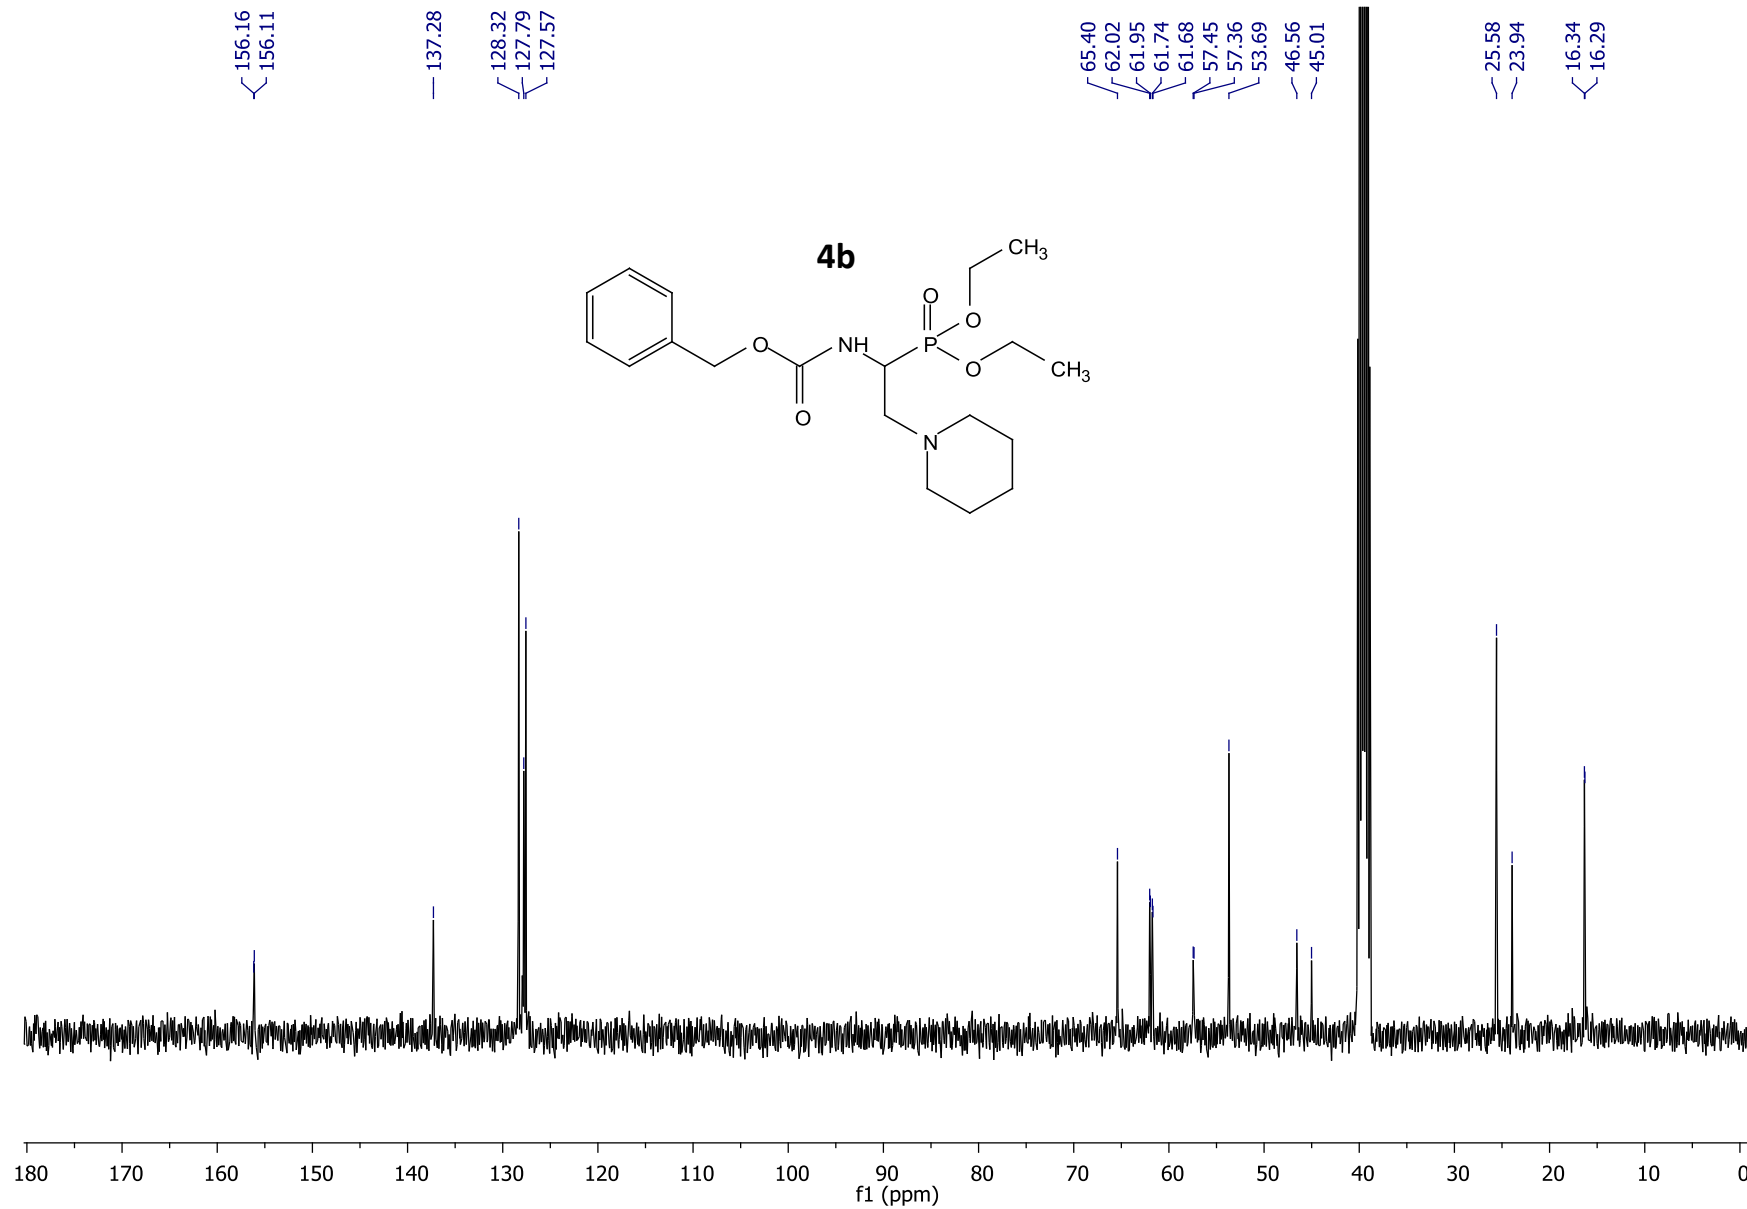

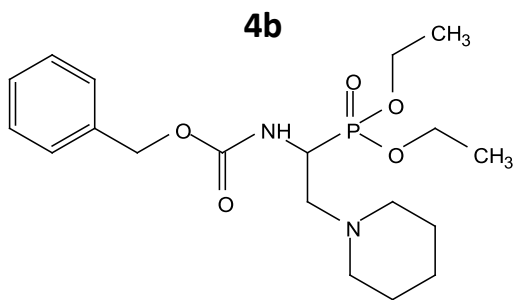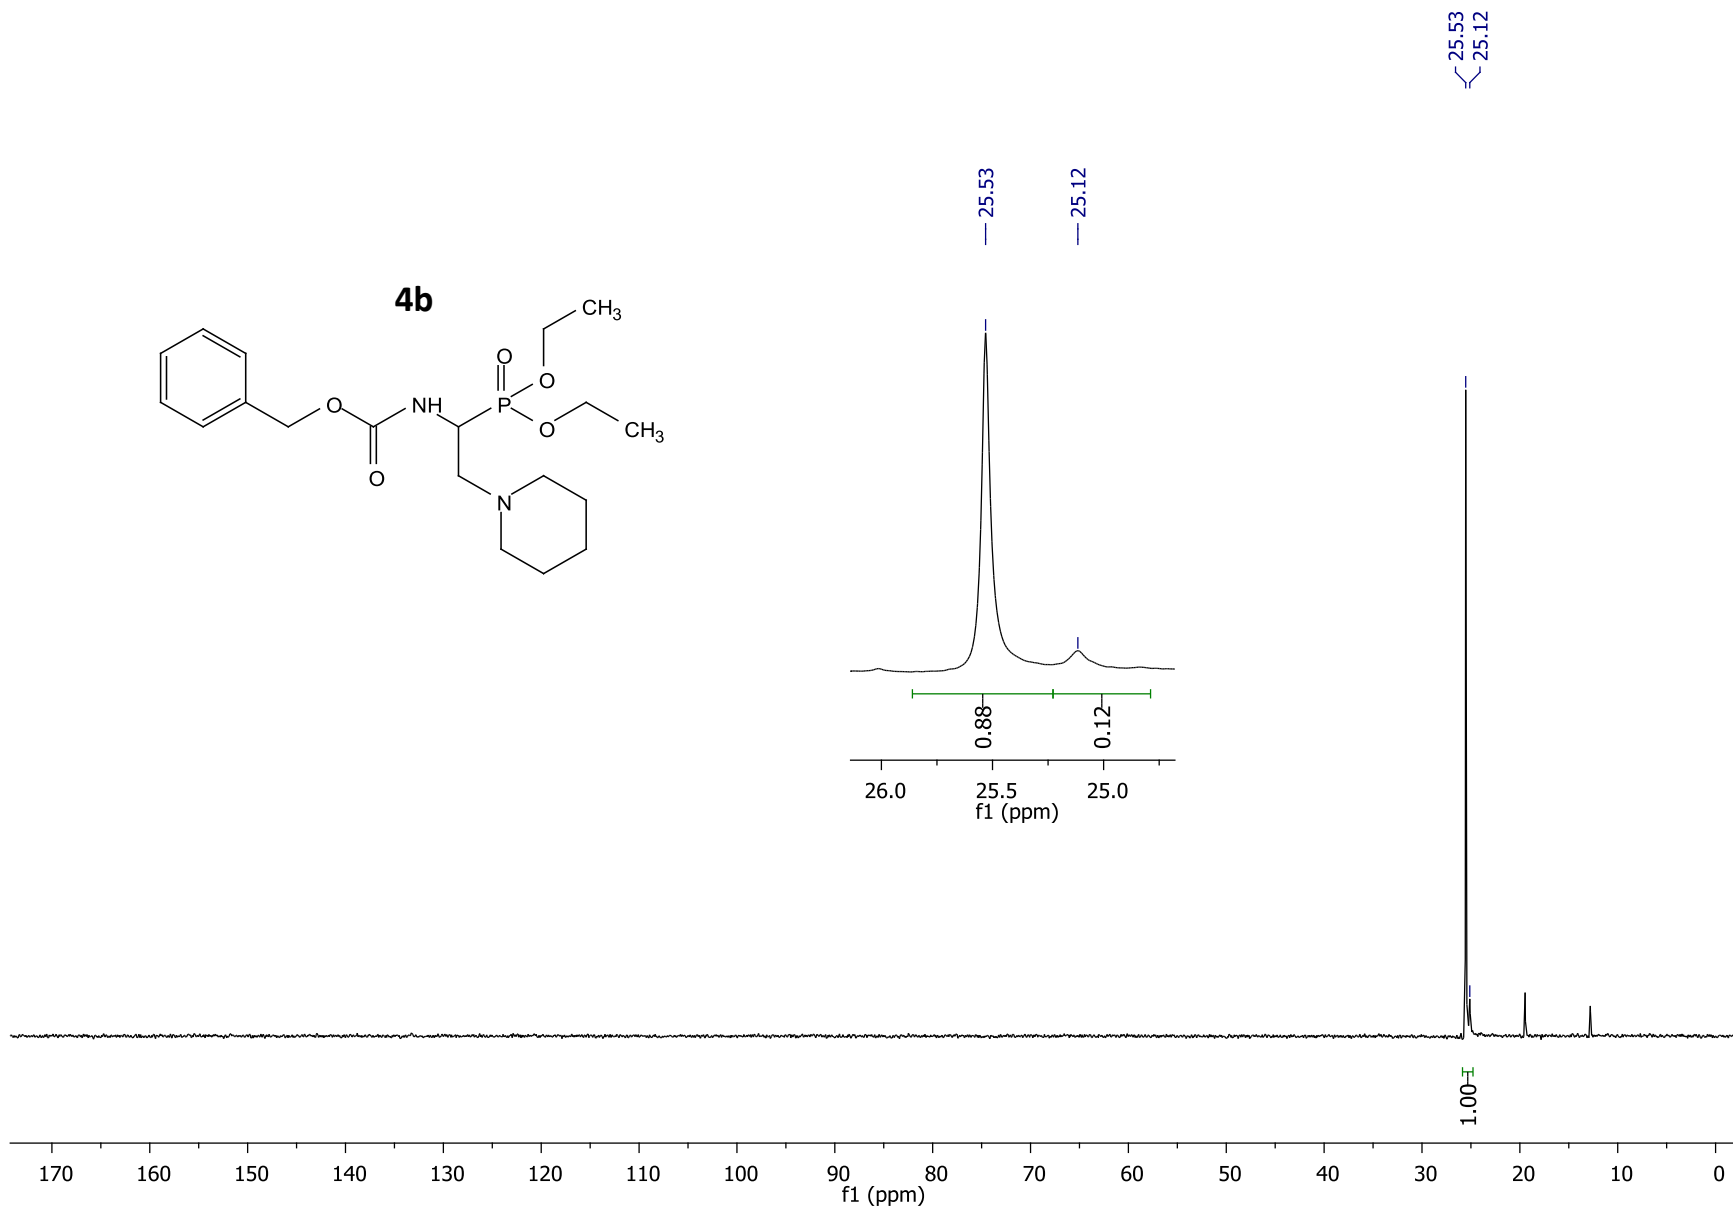



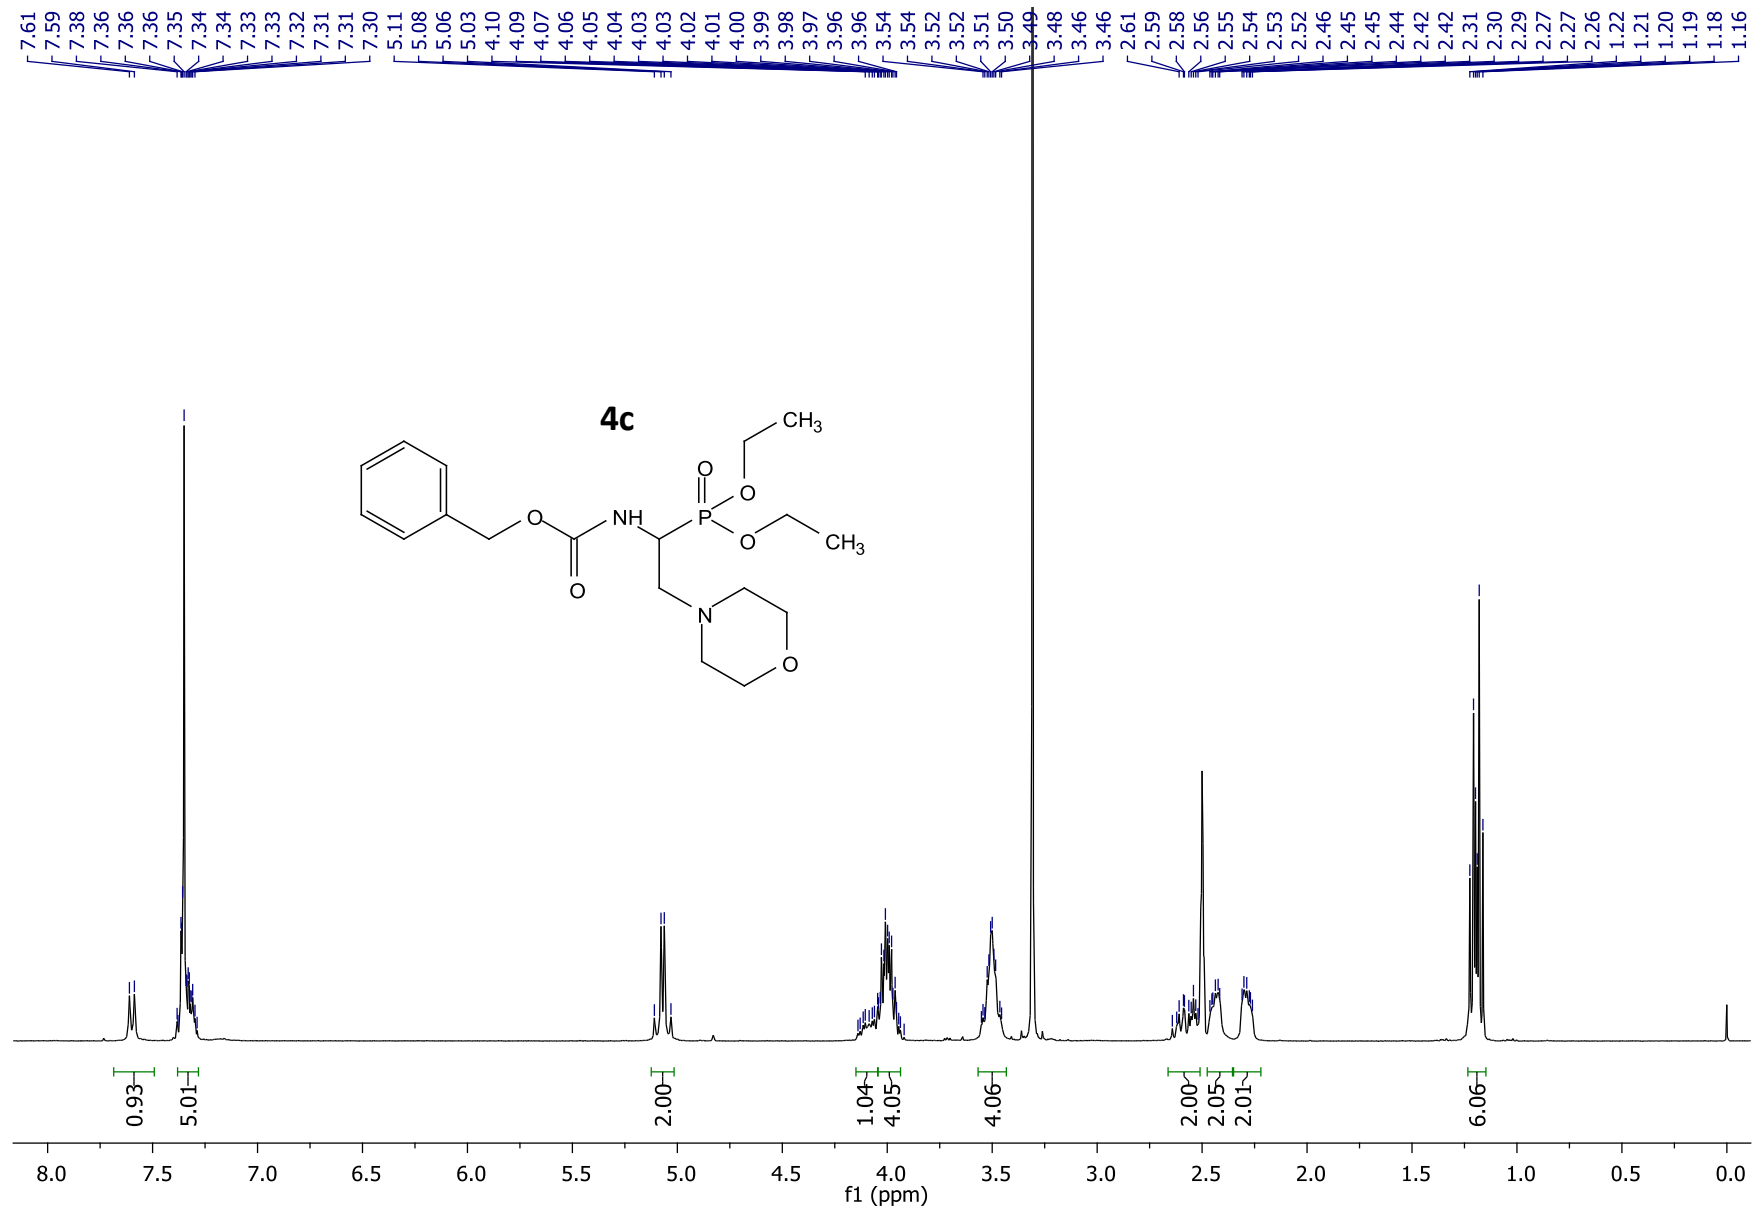

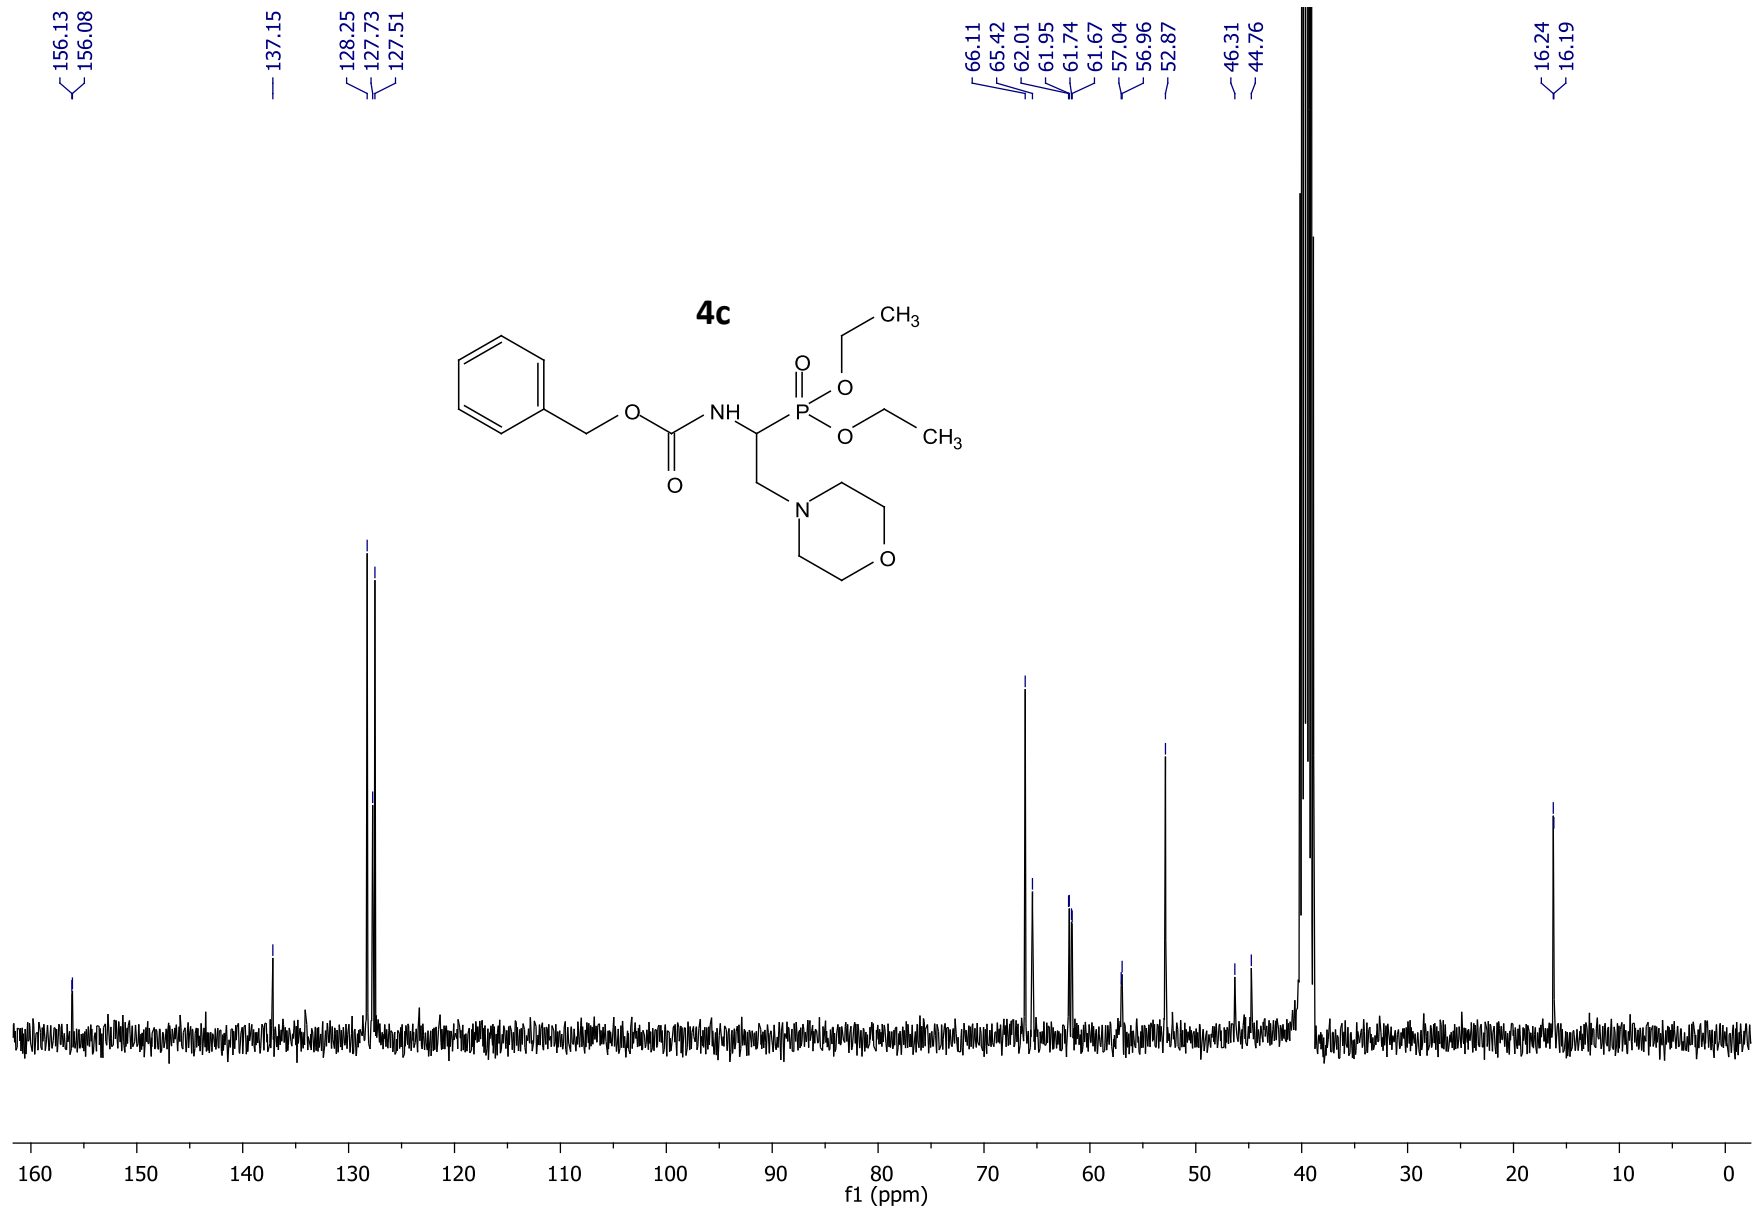

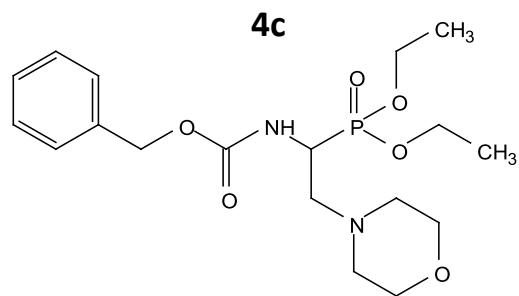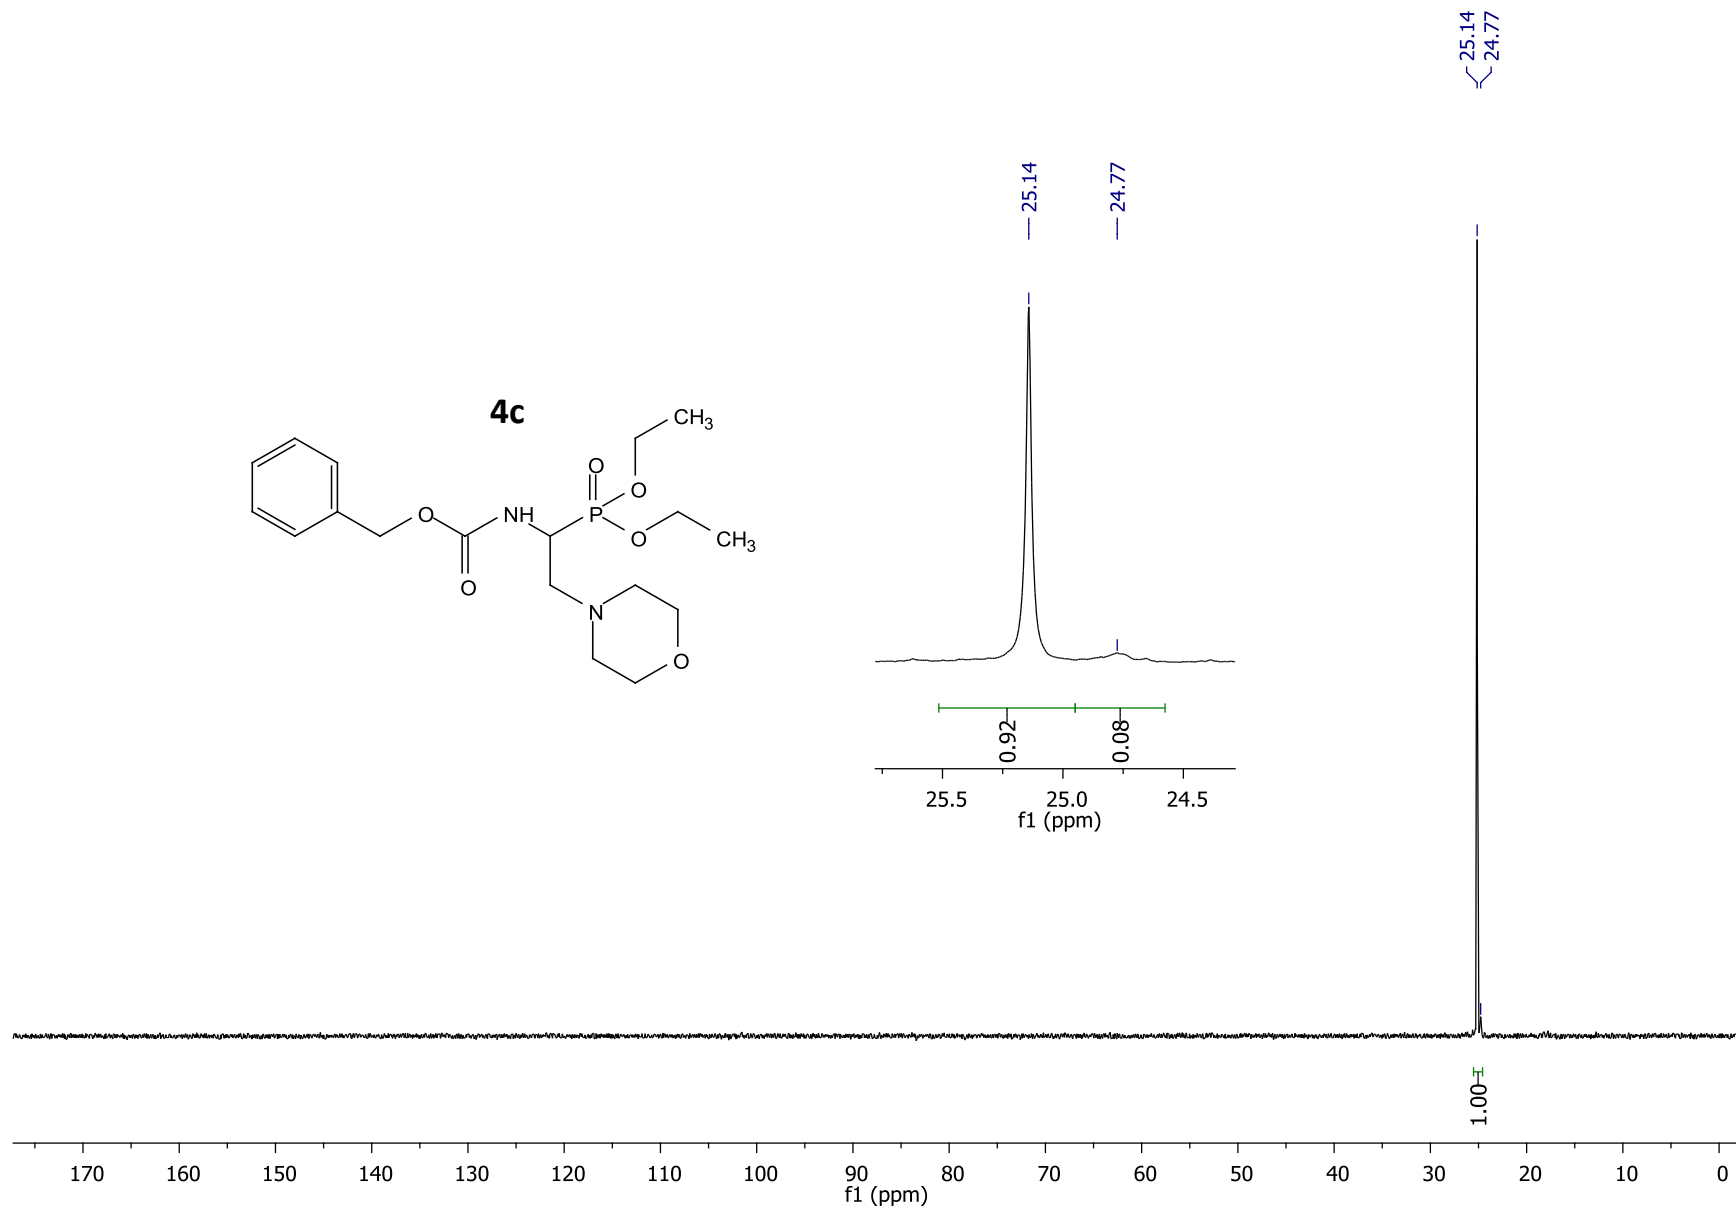

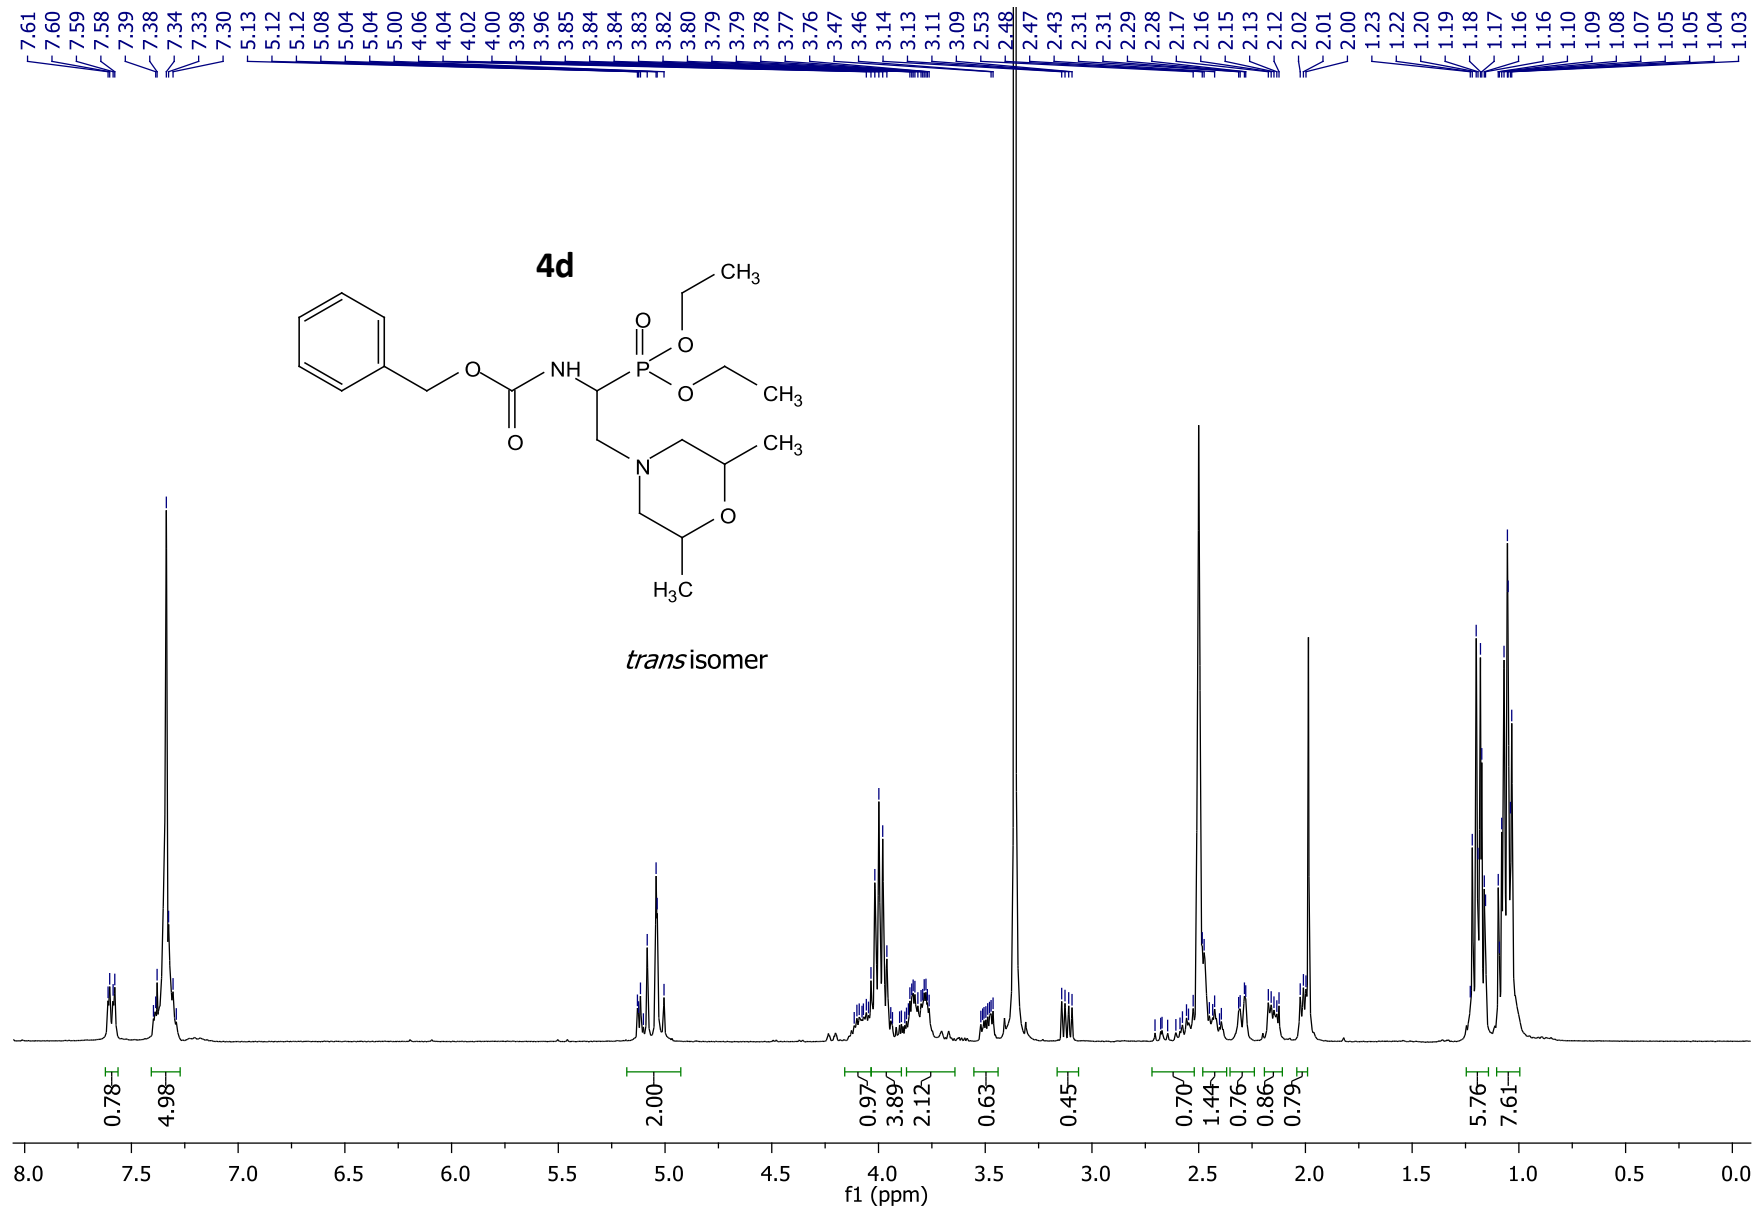

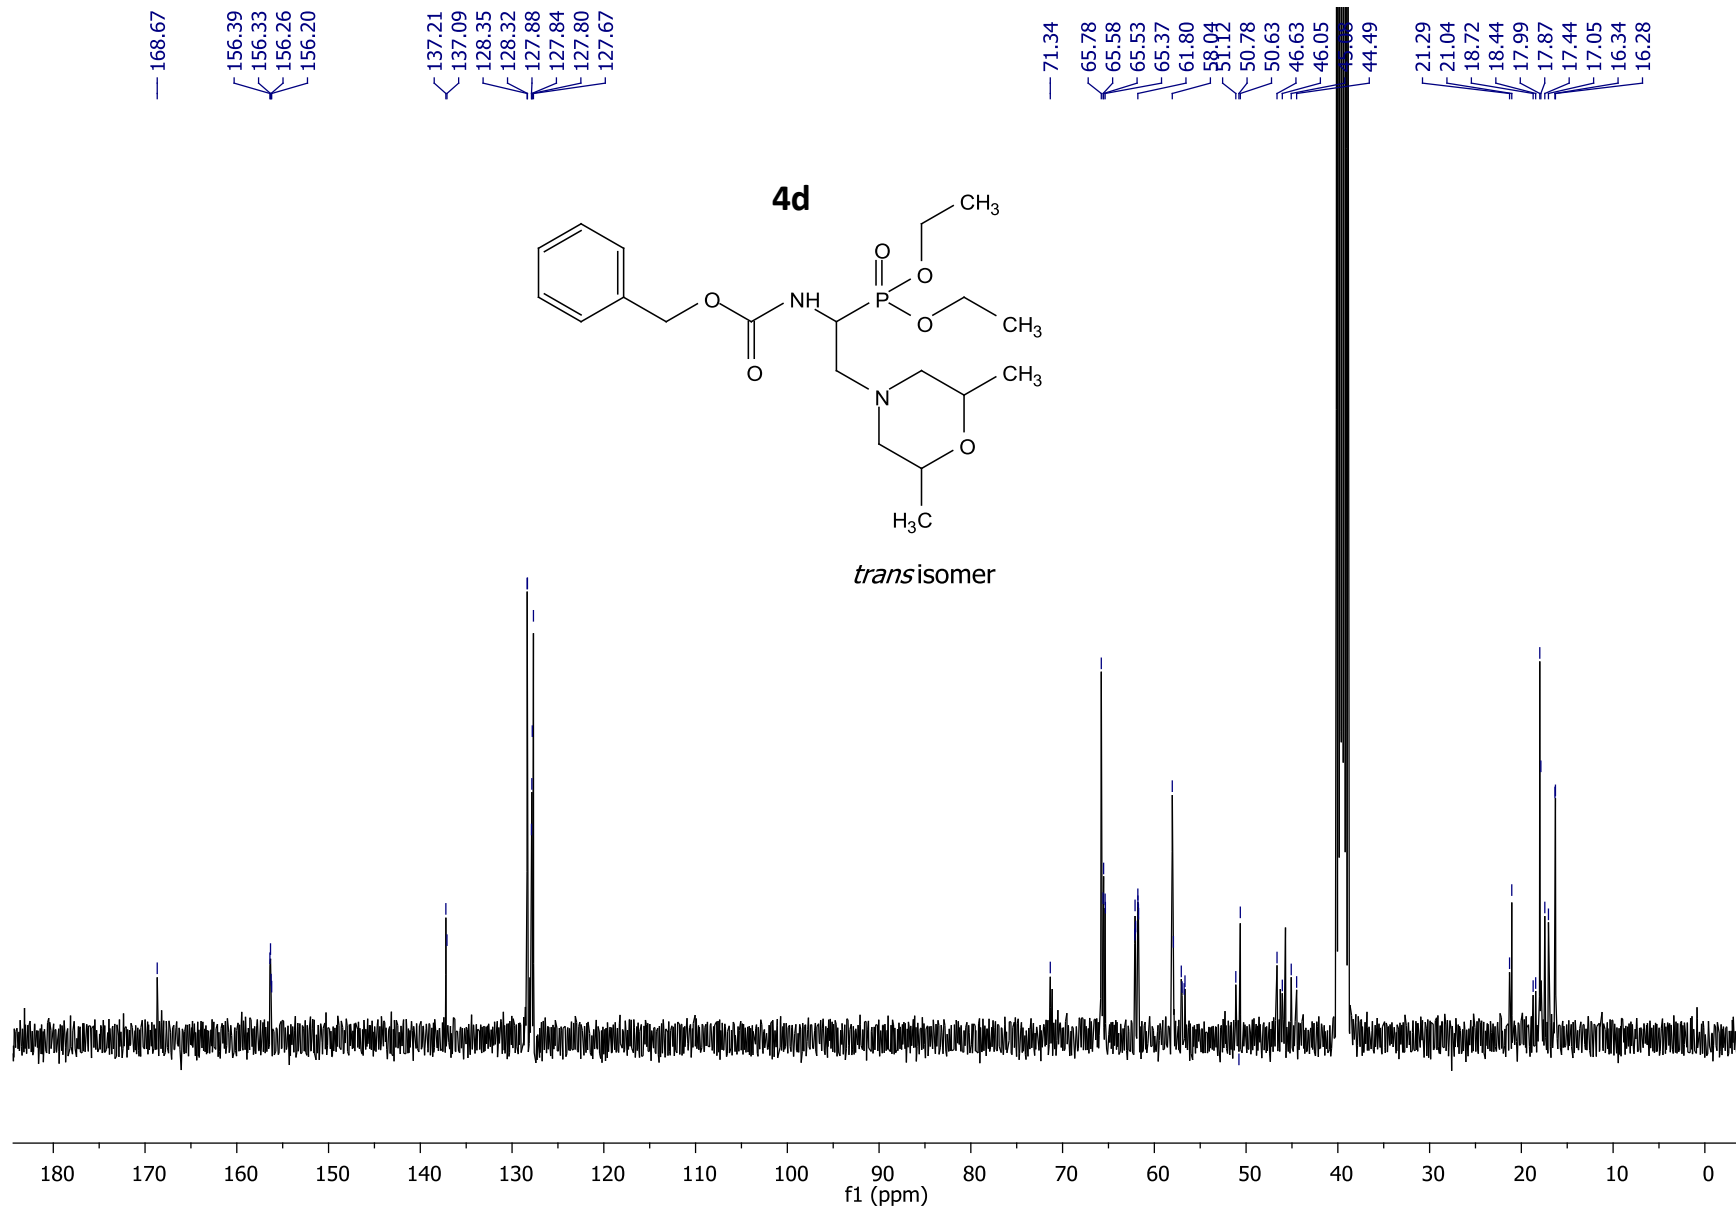

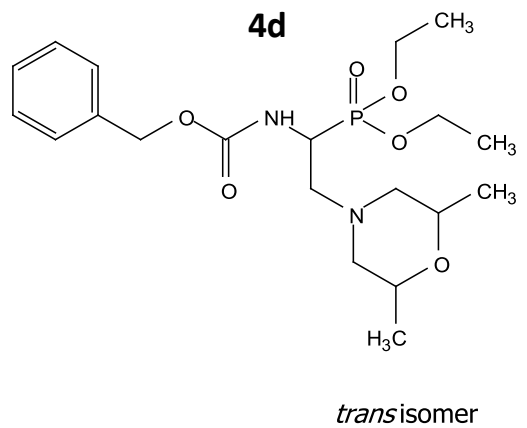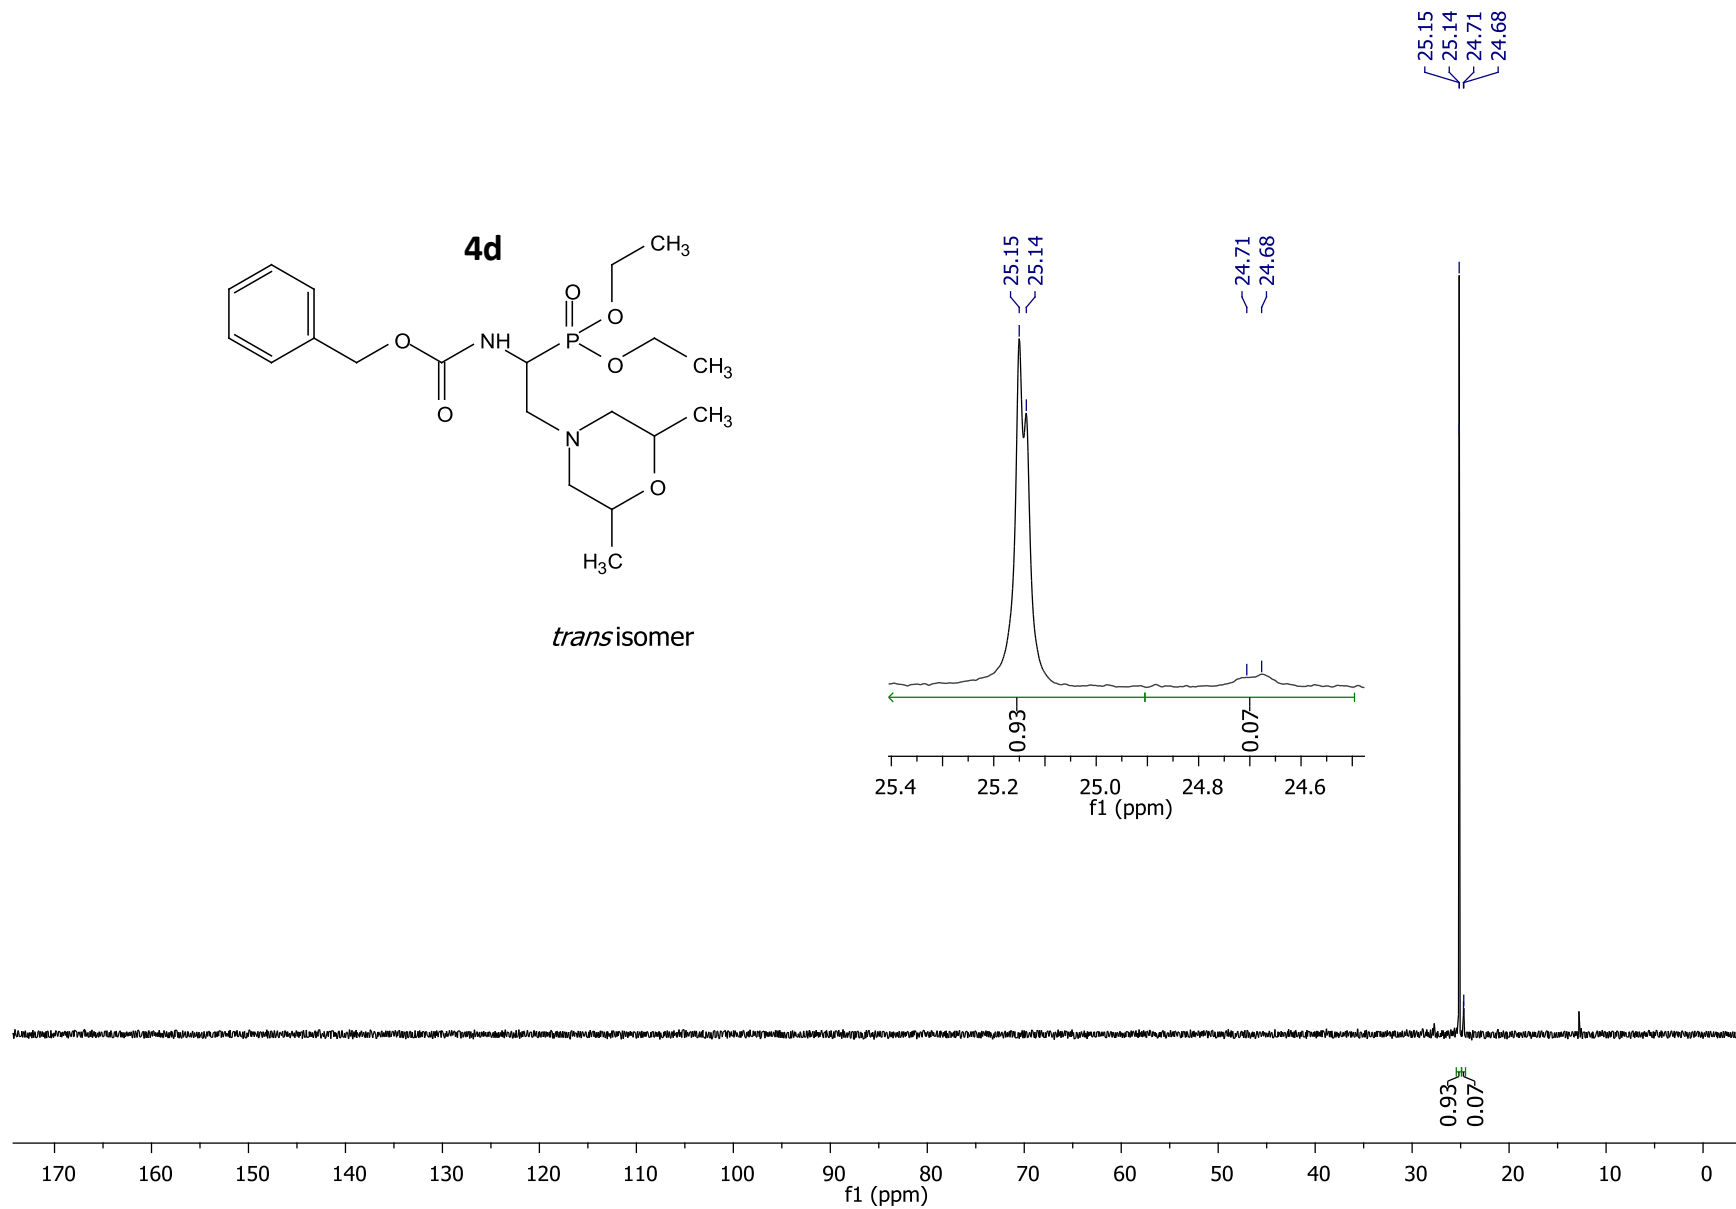

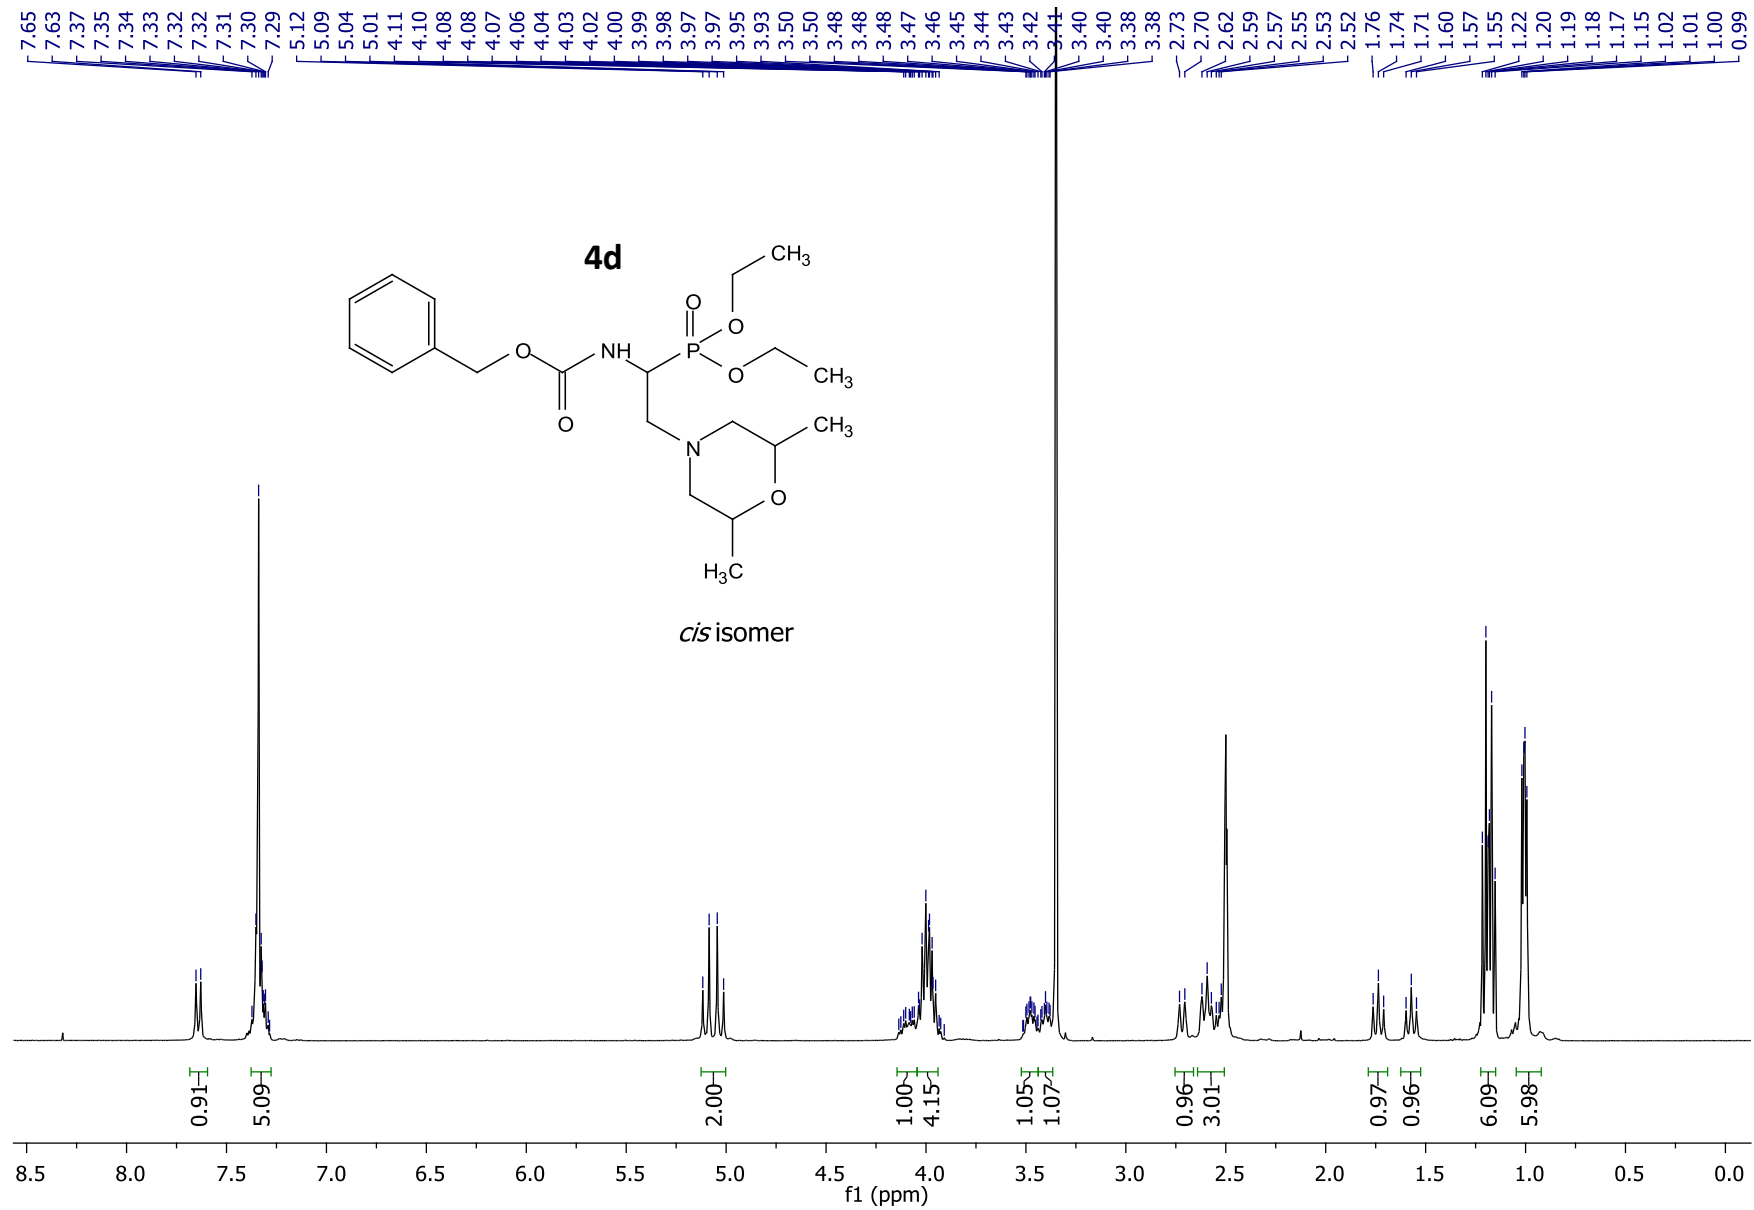

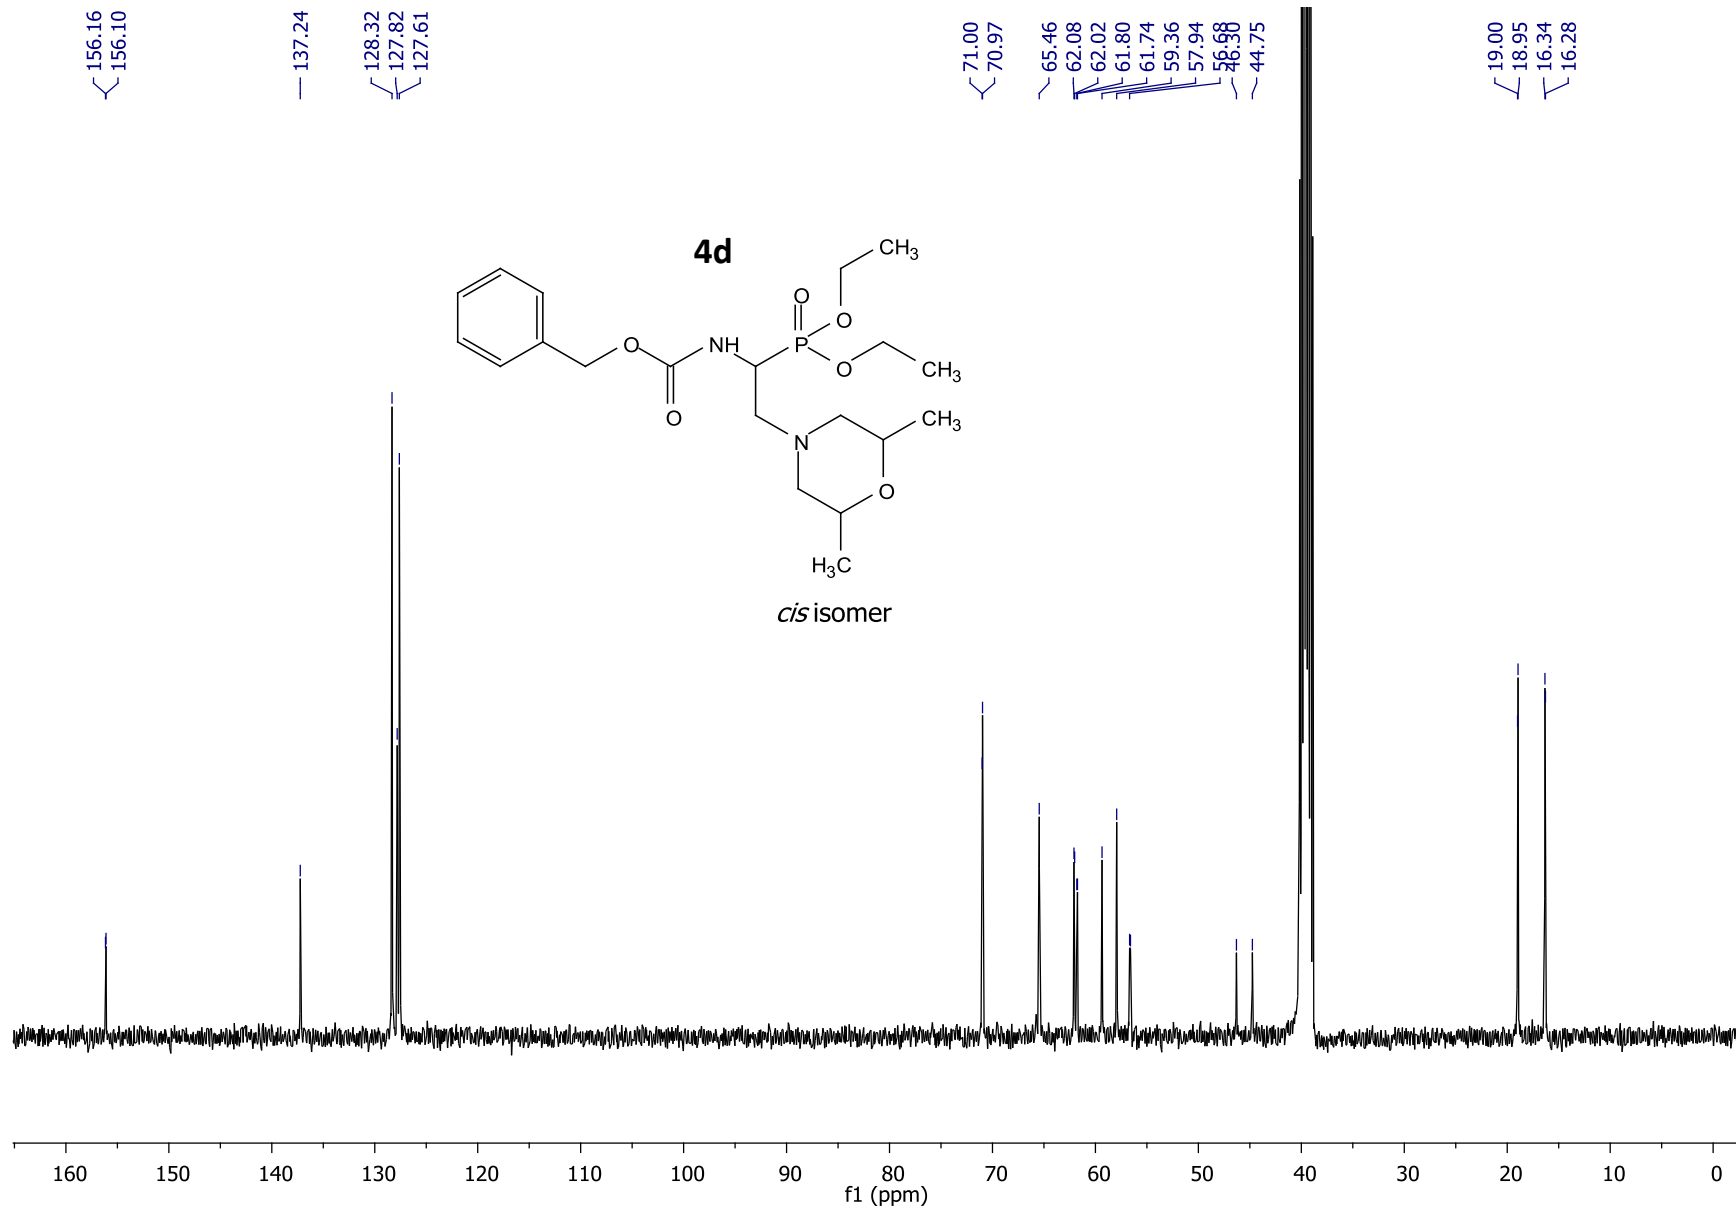



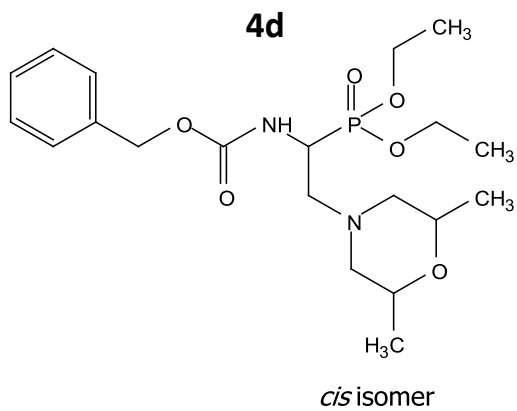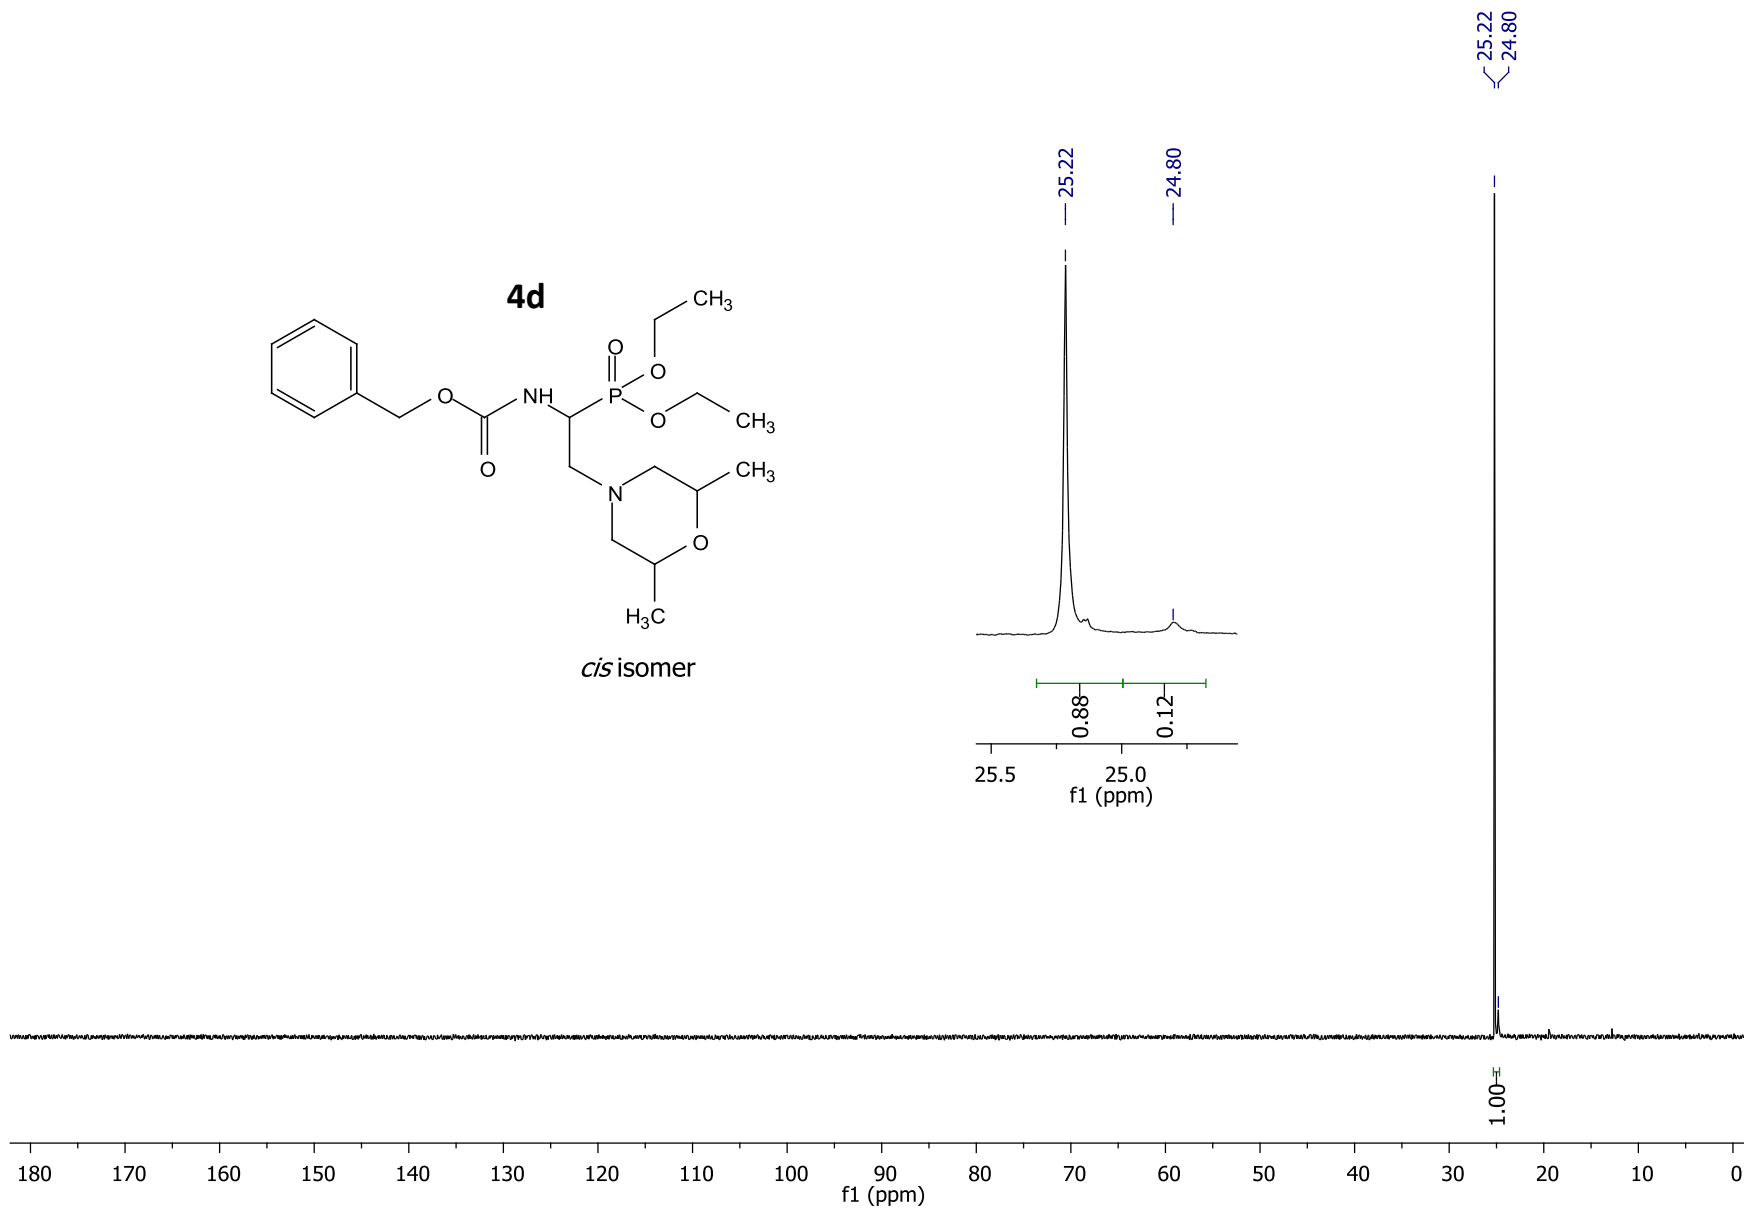

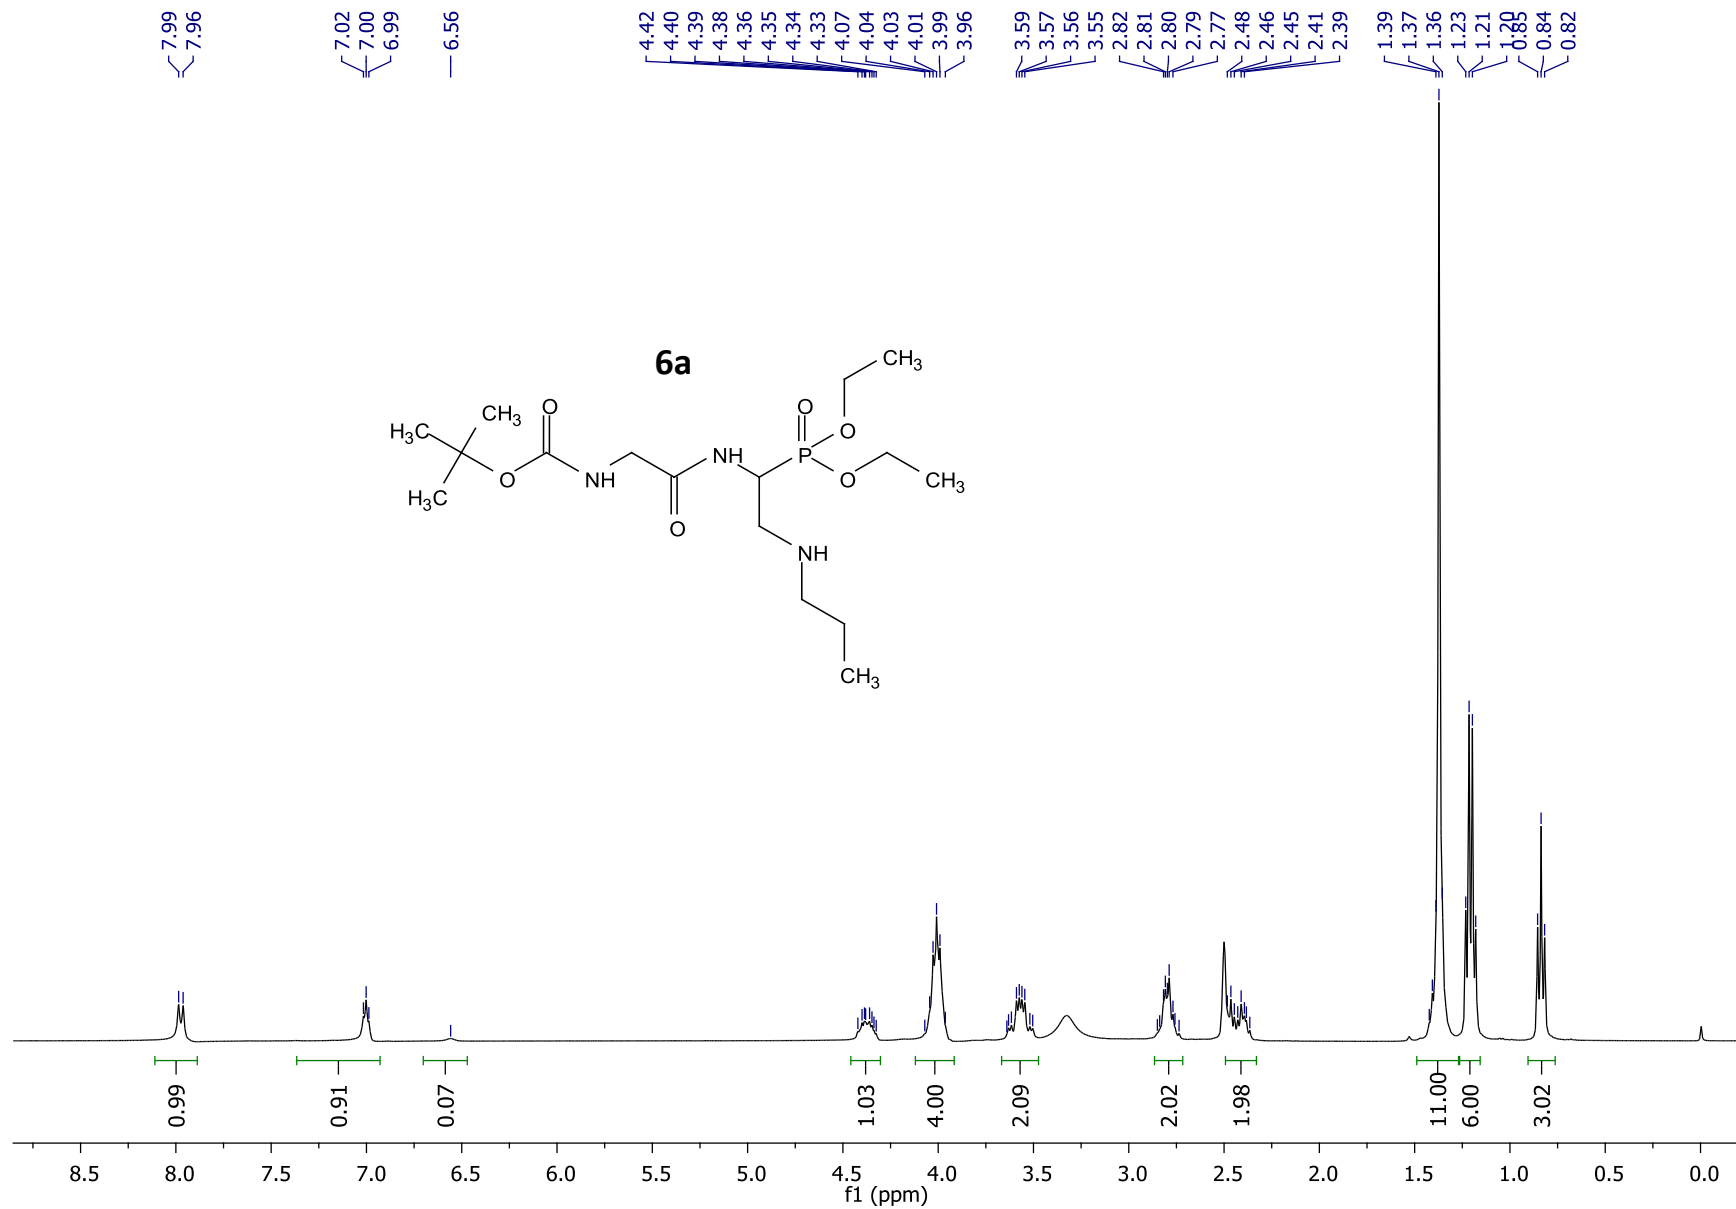

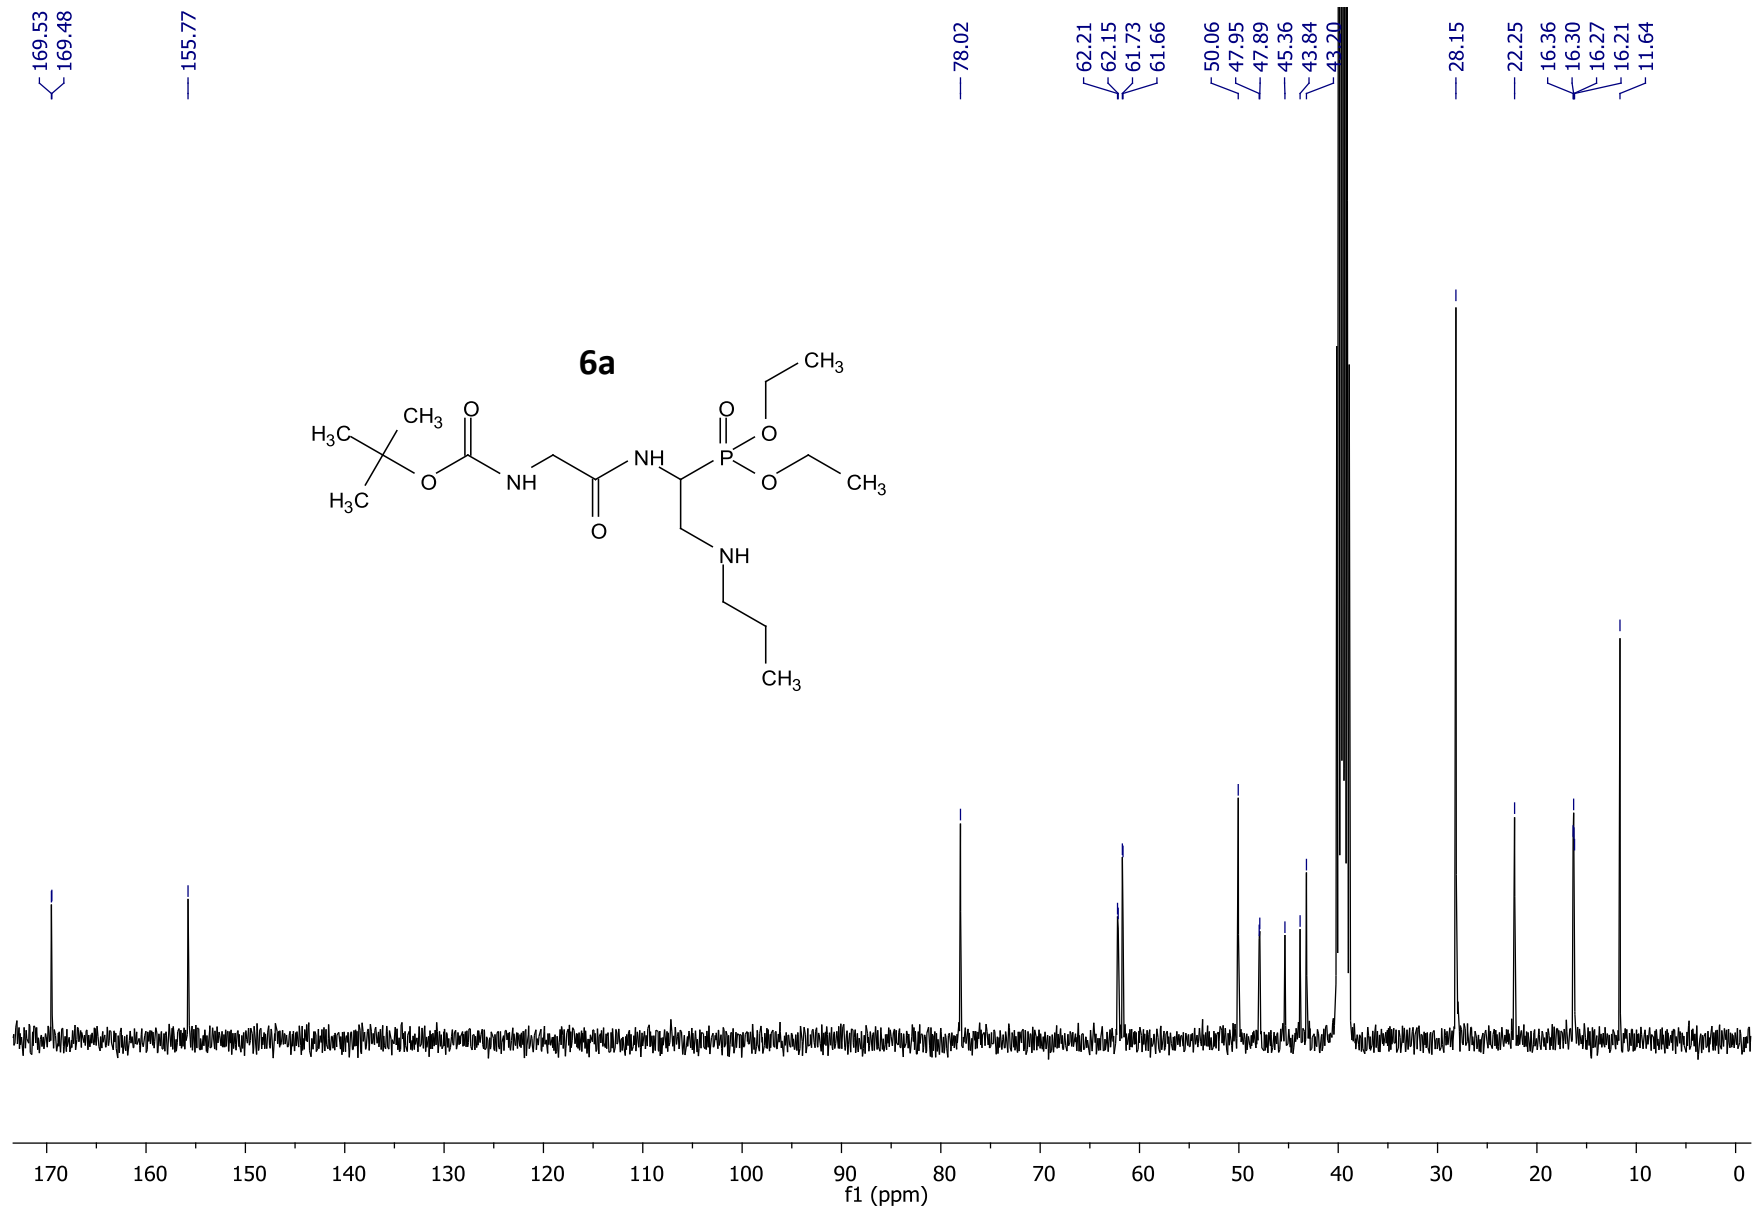

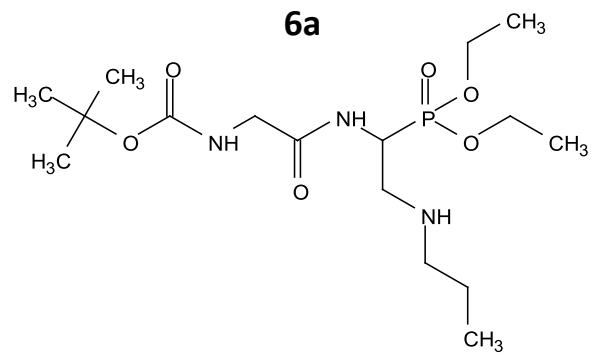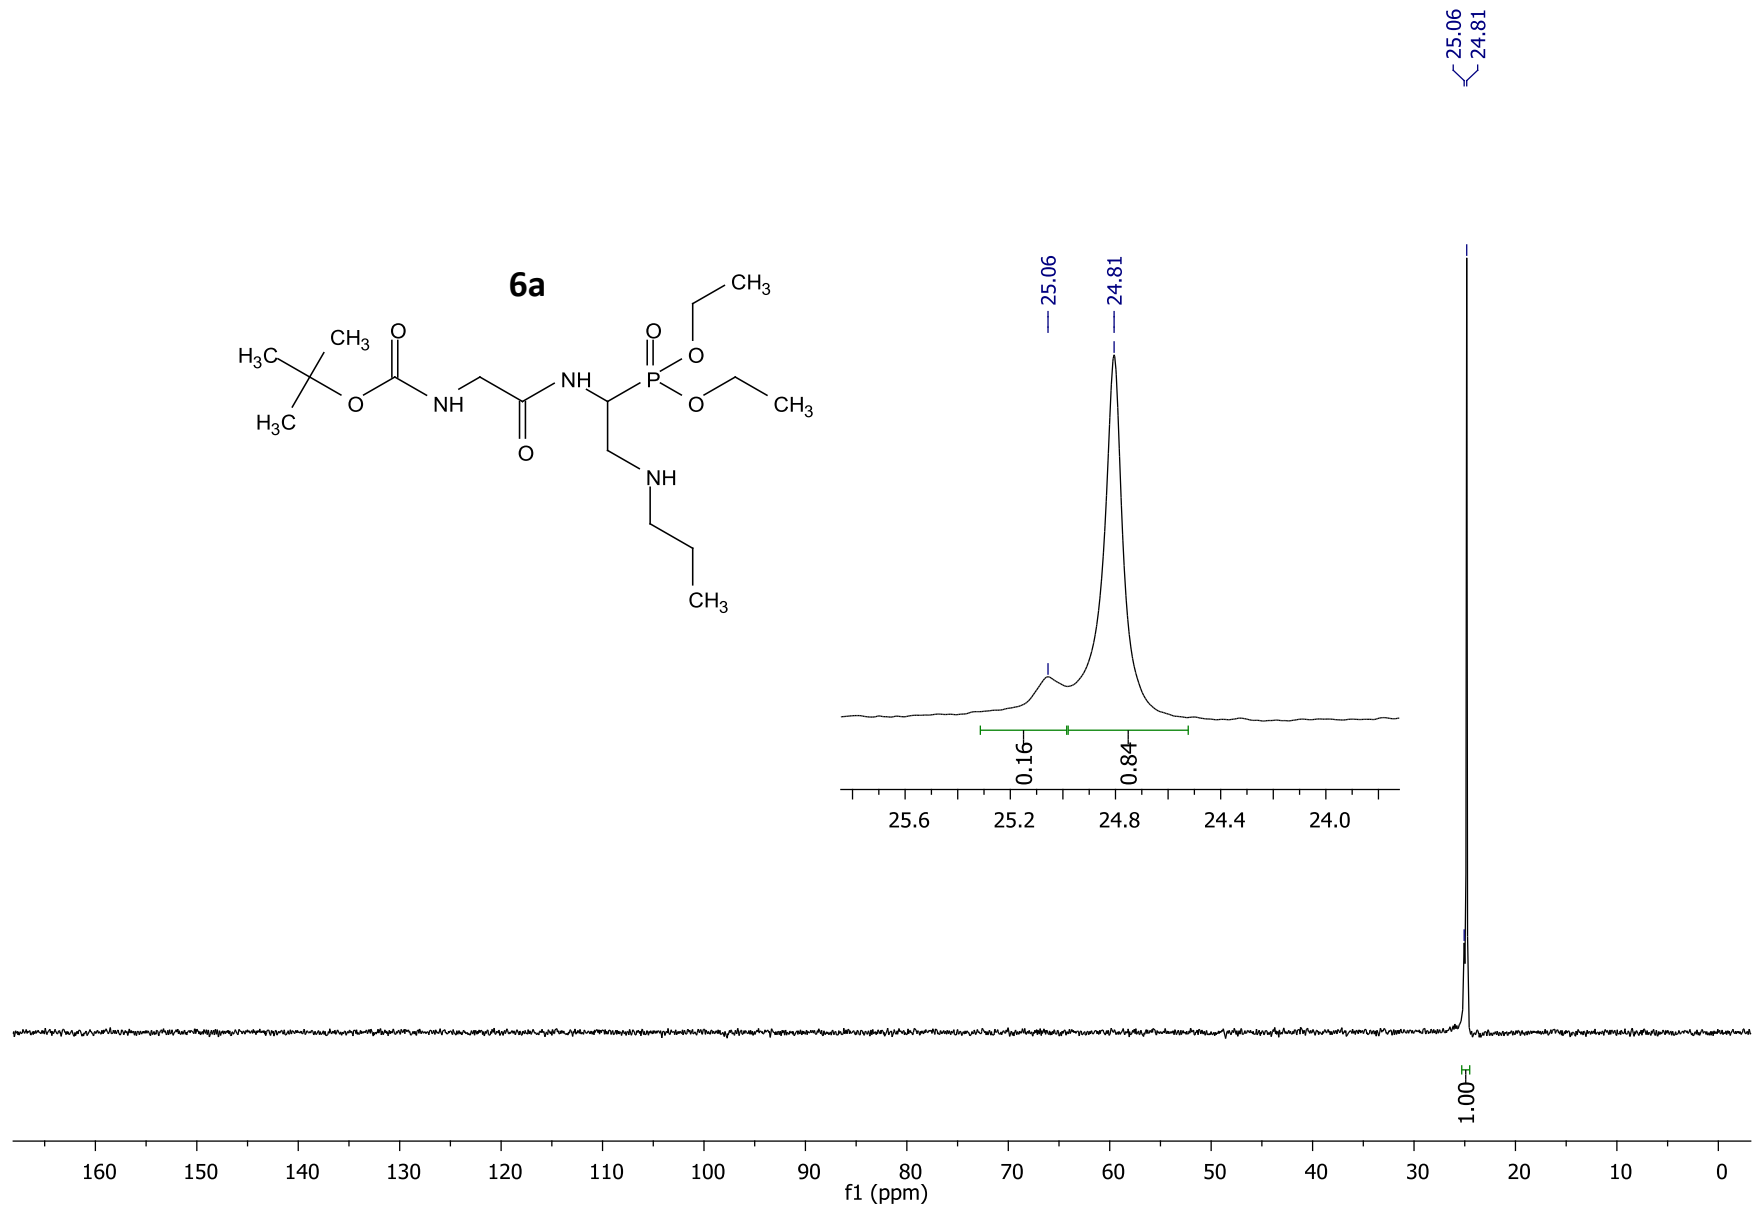

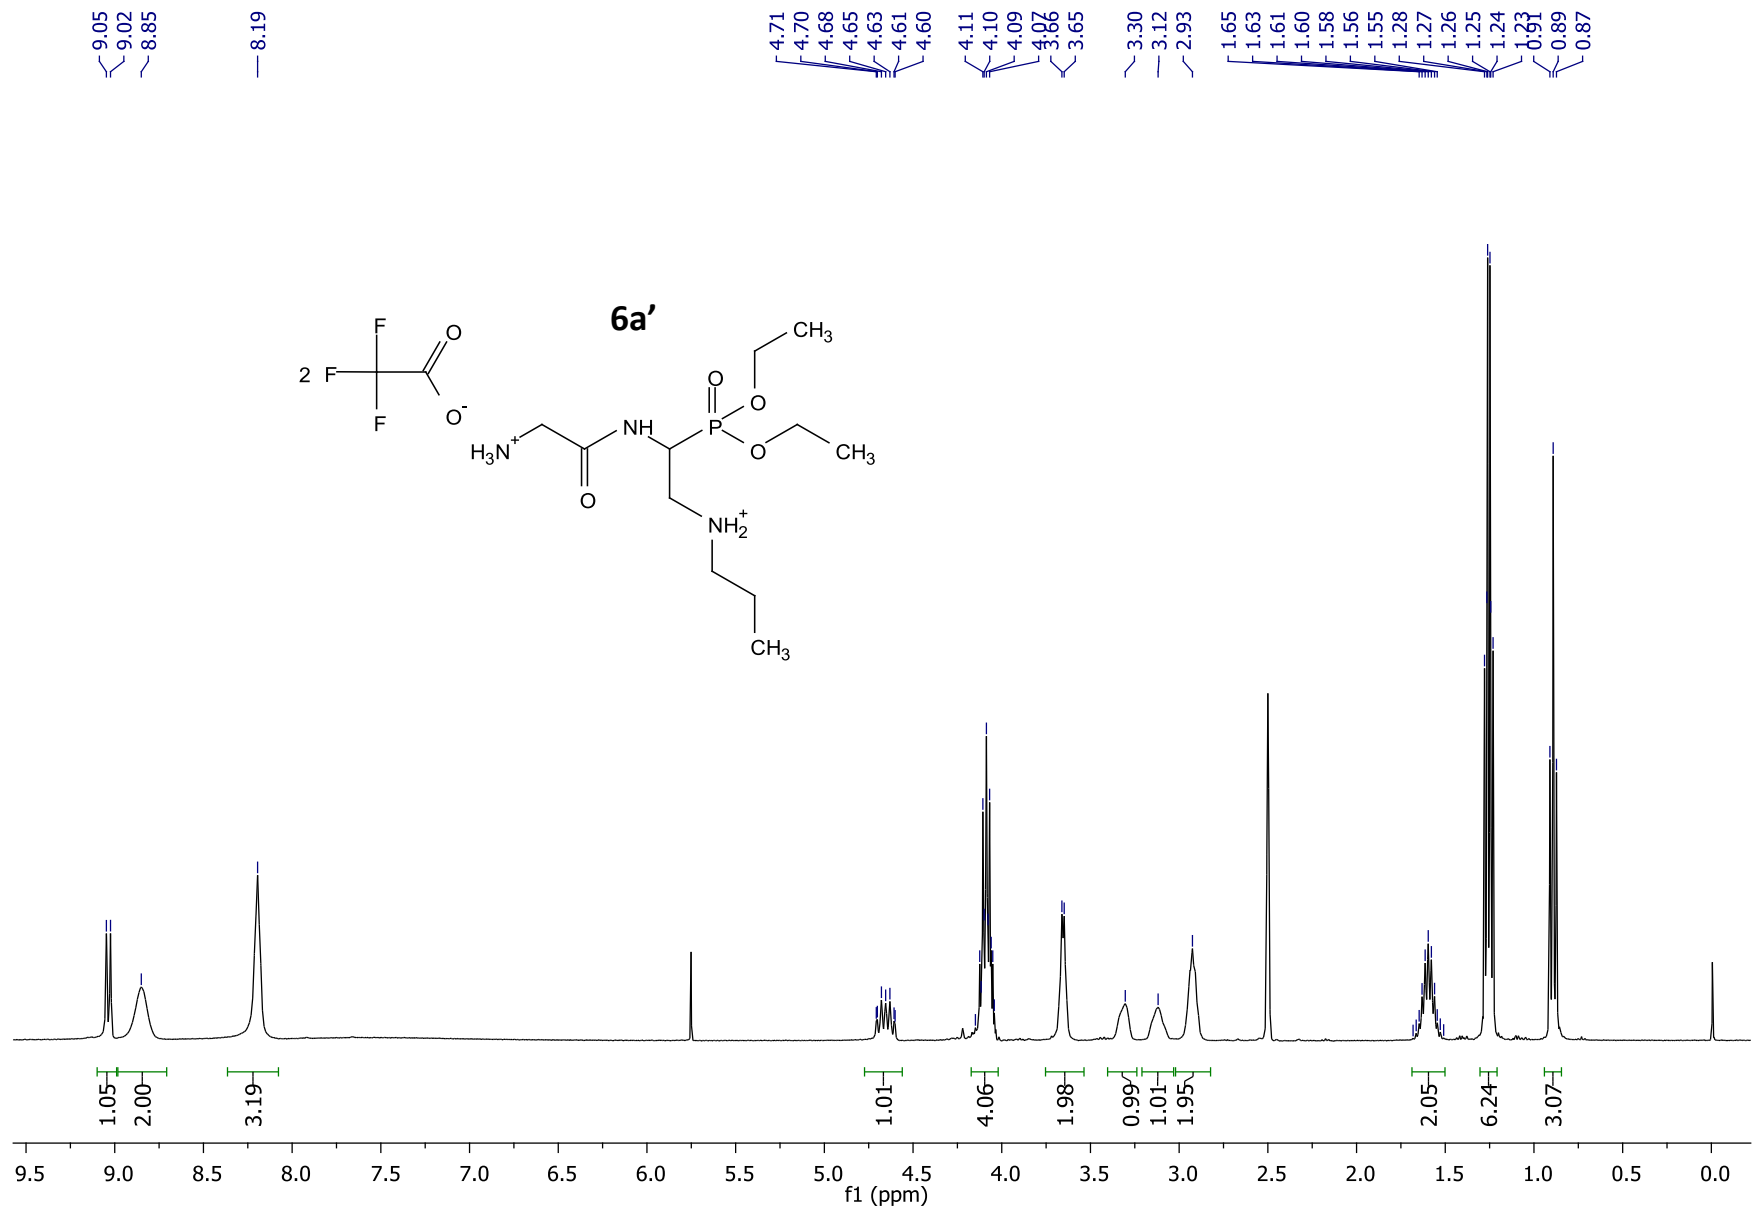

166.94  
166.89  
159.03  
158.69  
158.35  
158.01

120.67  
117.74  
114.81  
111.88

63.09  
63.02  
62.79  
62.73

48.51  
46.28  
46.17  
43.83  
42.26  
40.34

18.82  
16.31  
16.25  
16.22  
16.16  
10.83

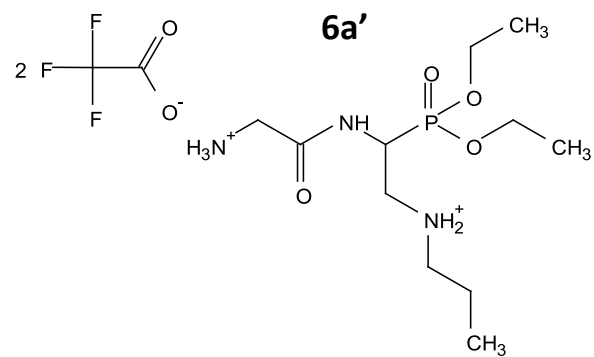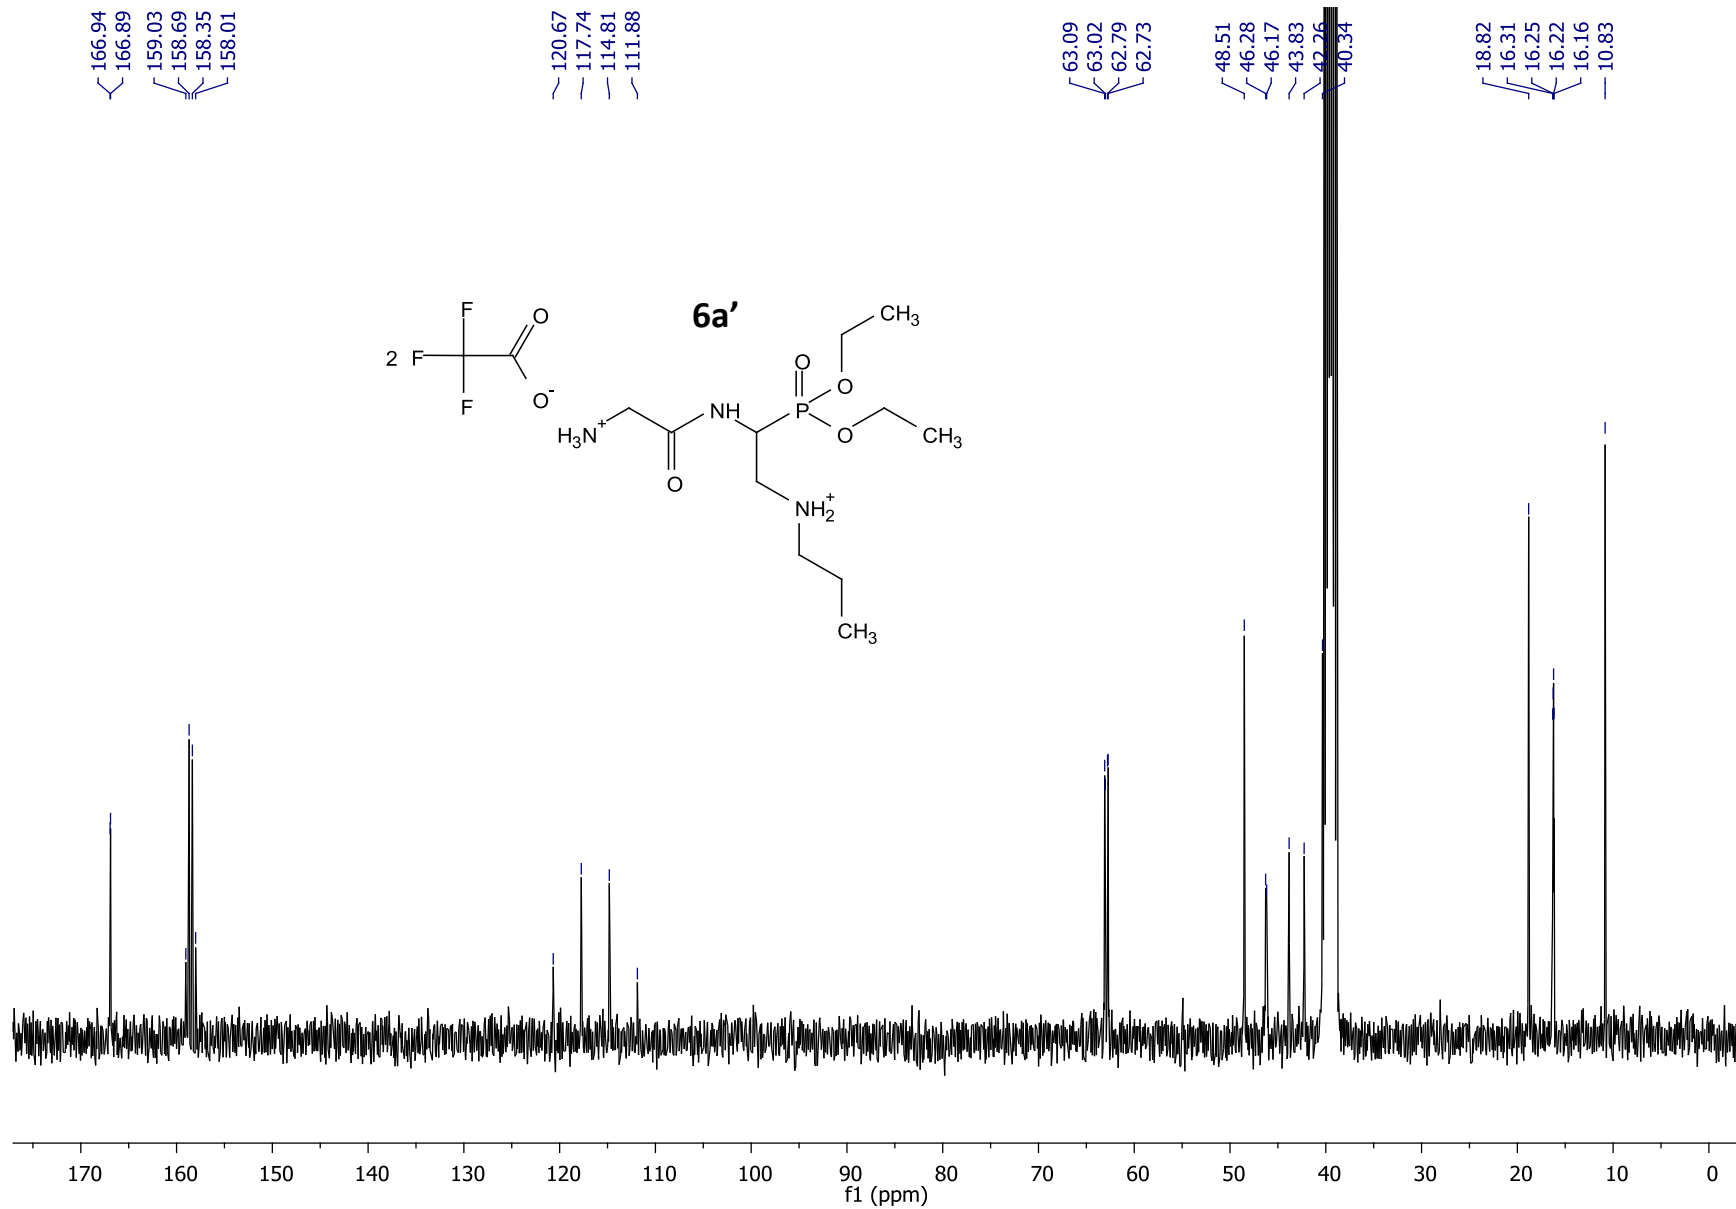

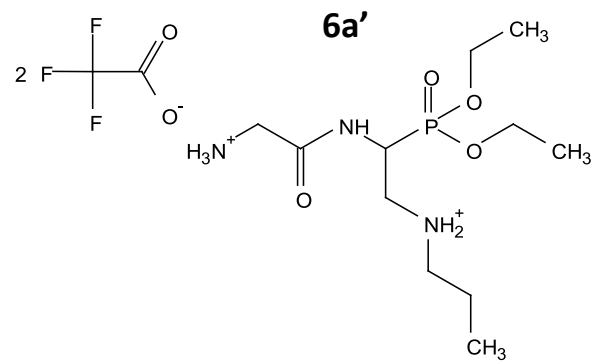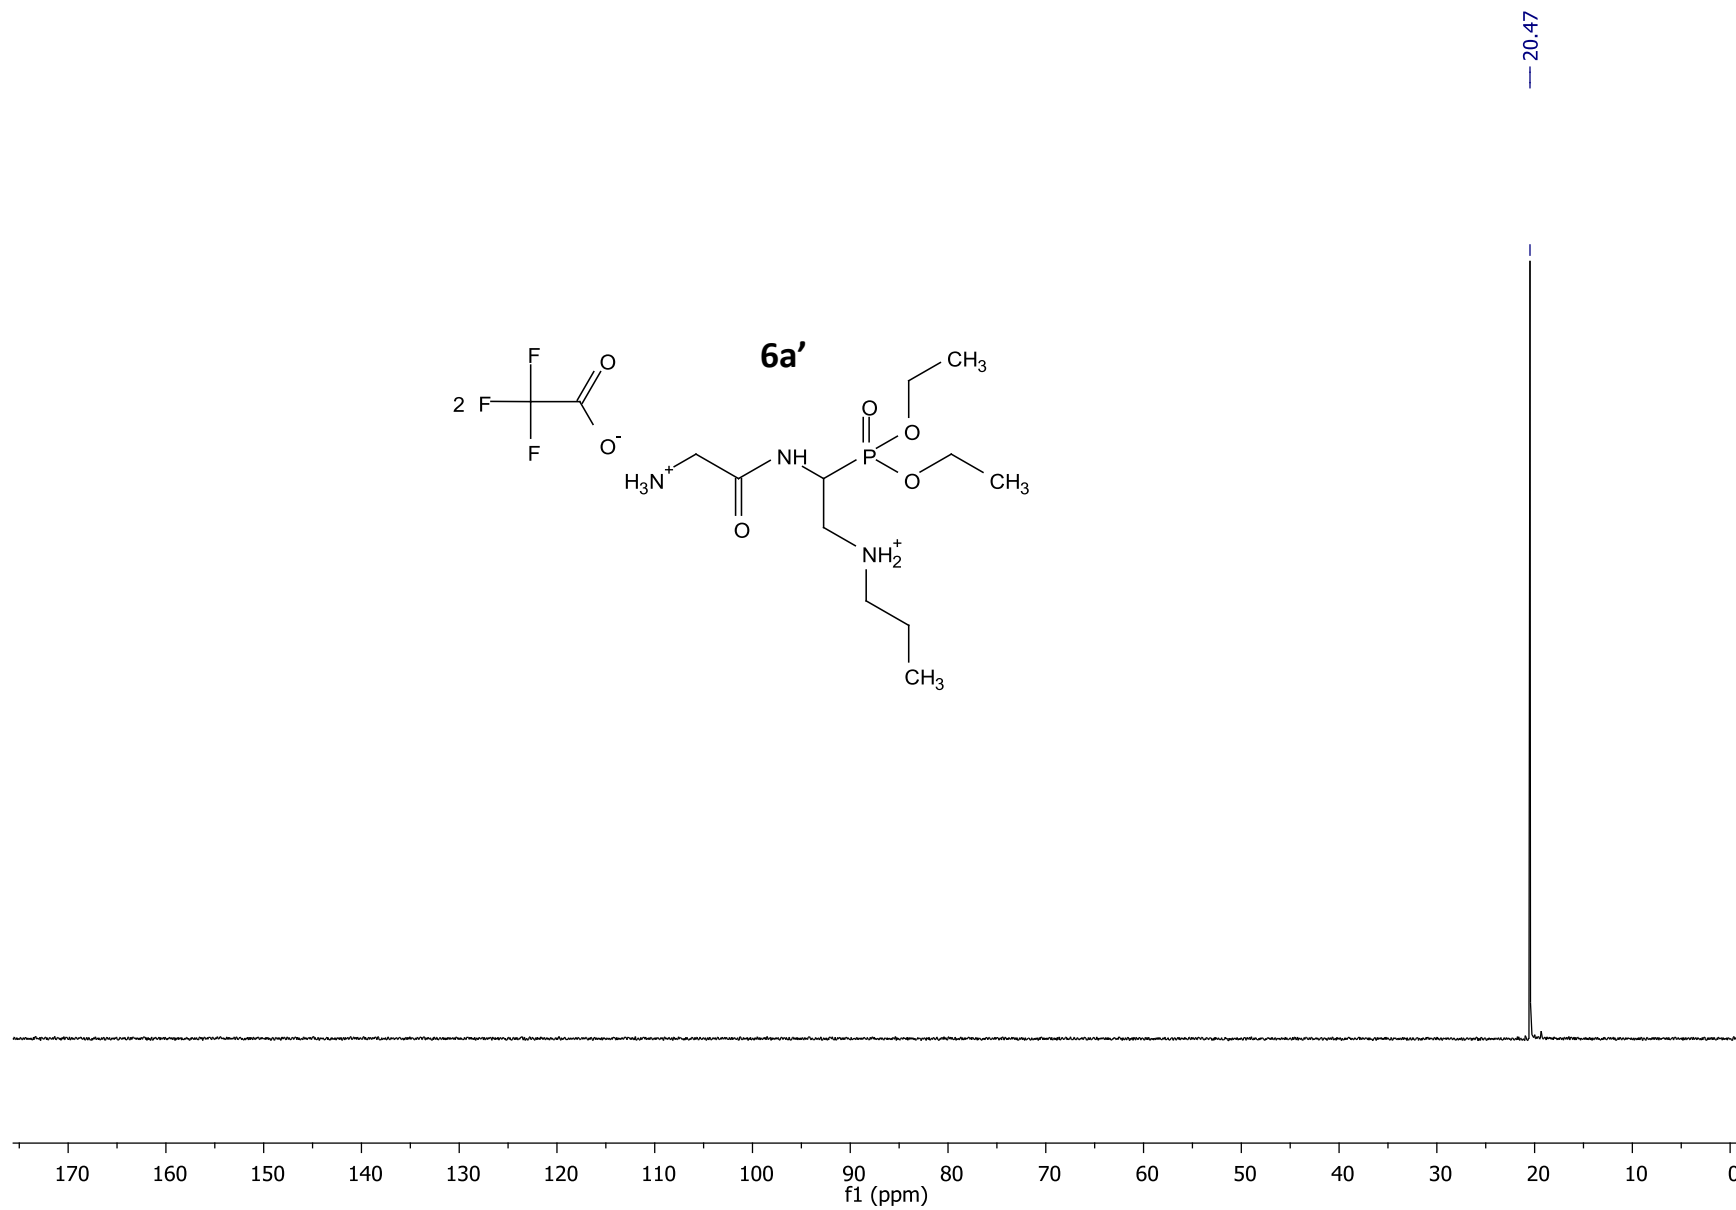

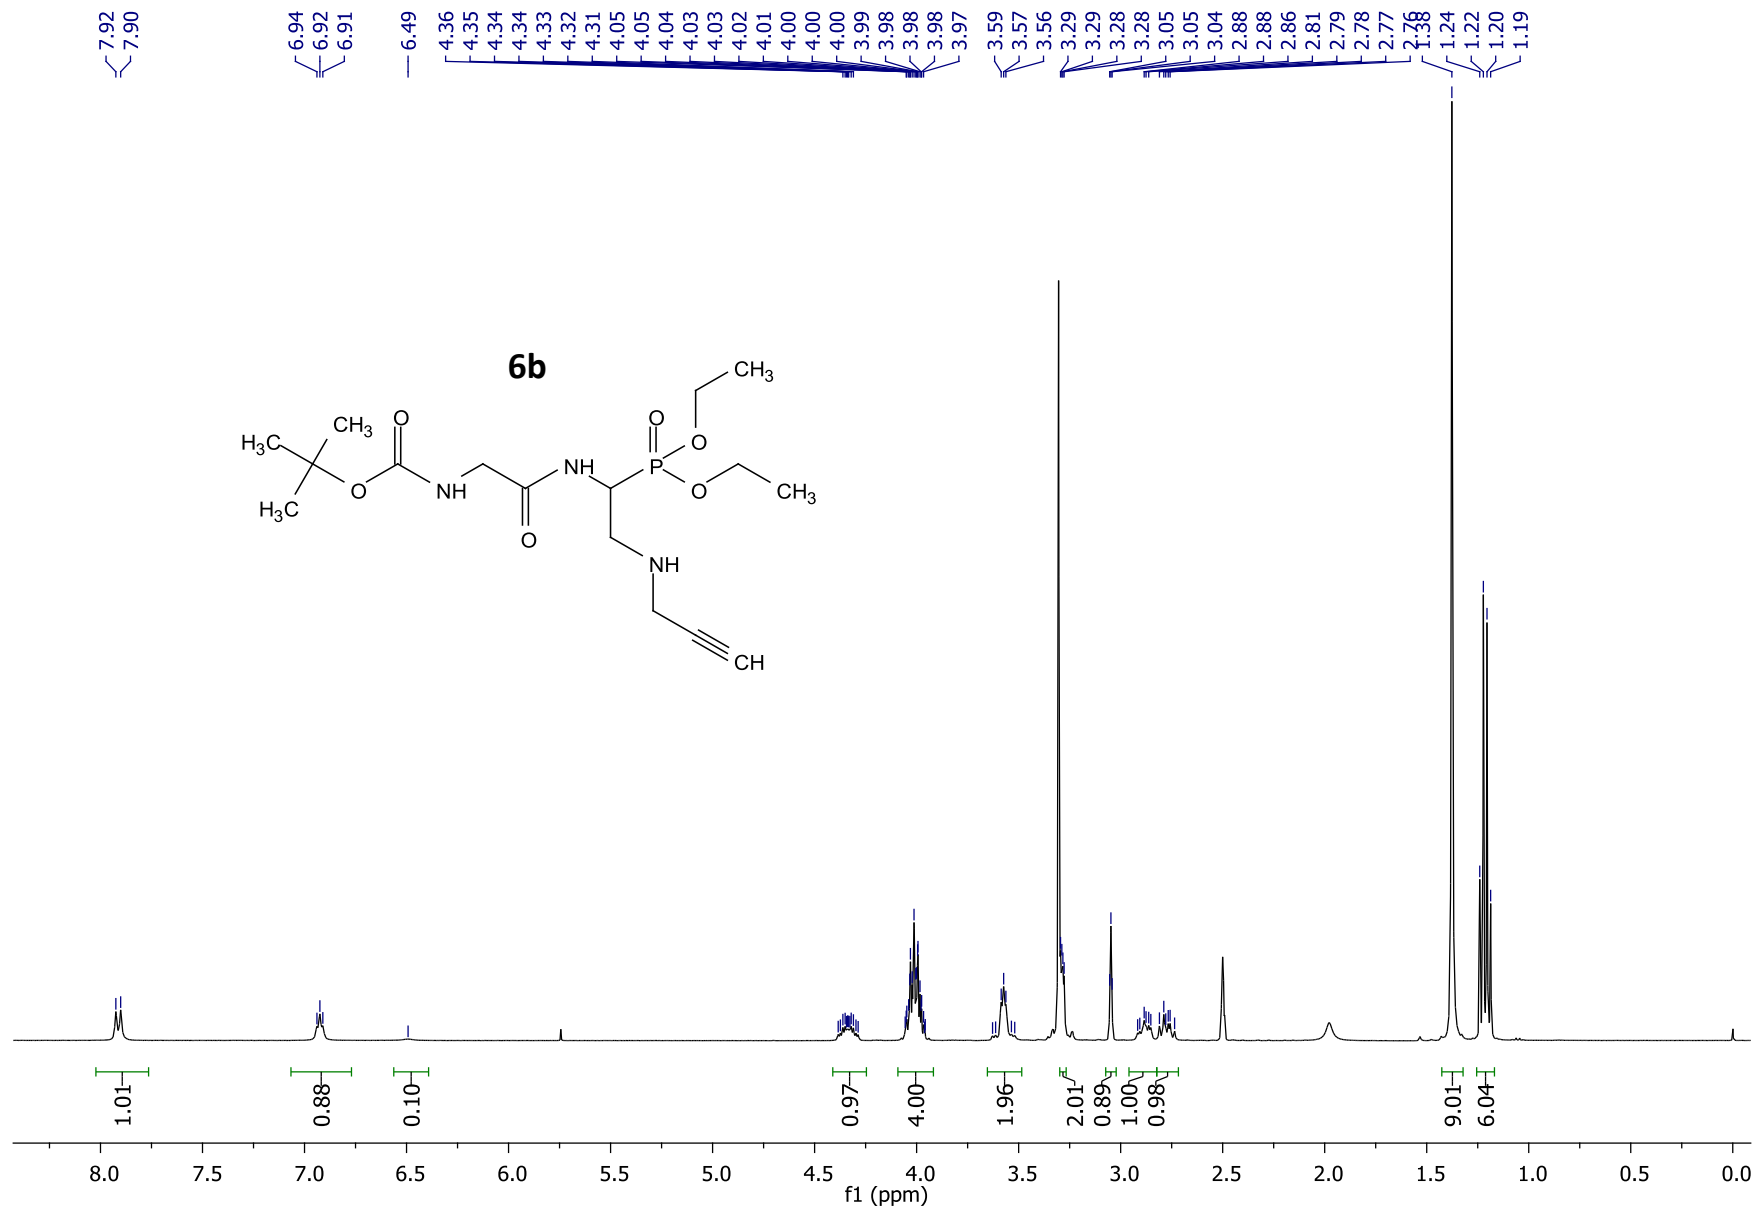



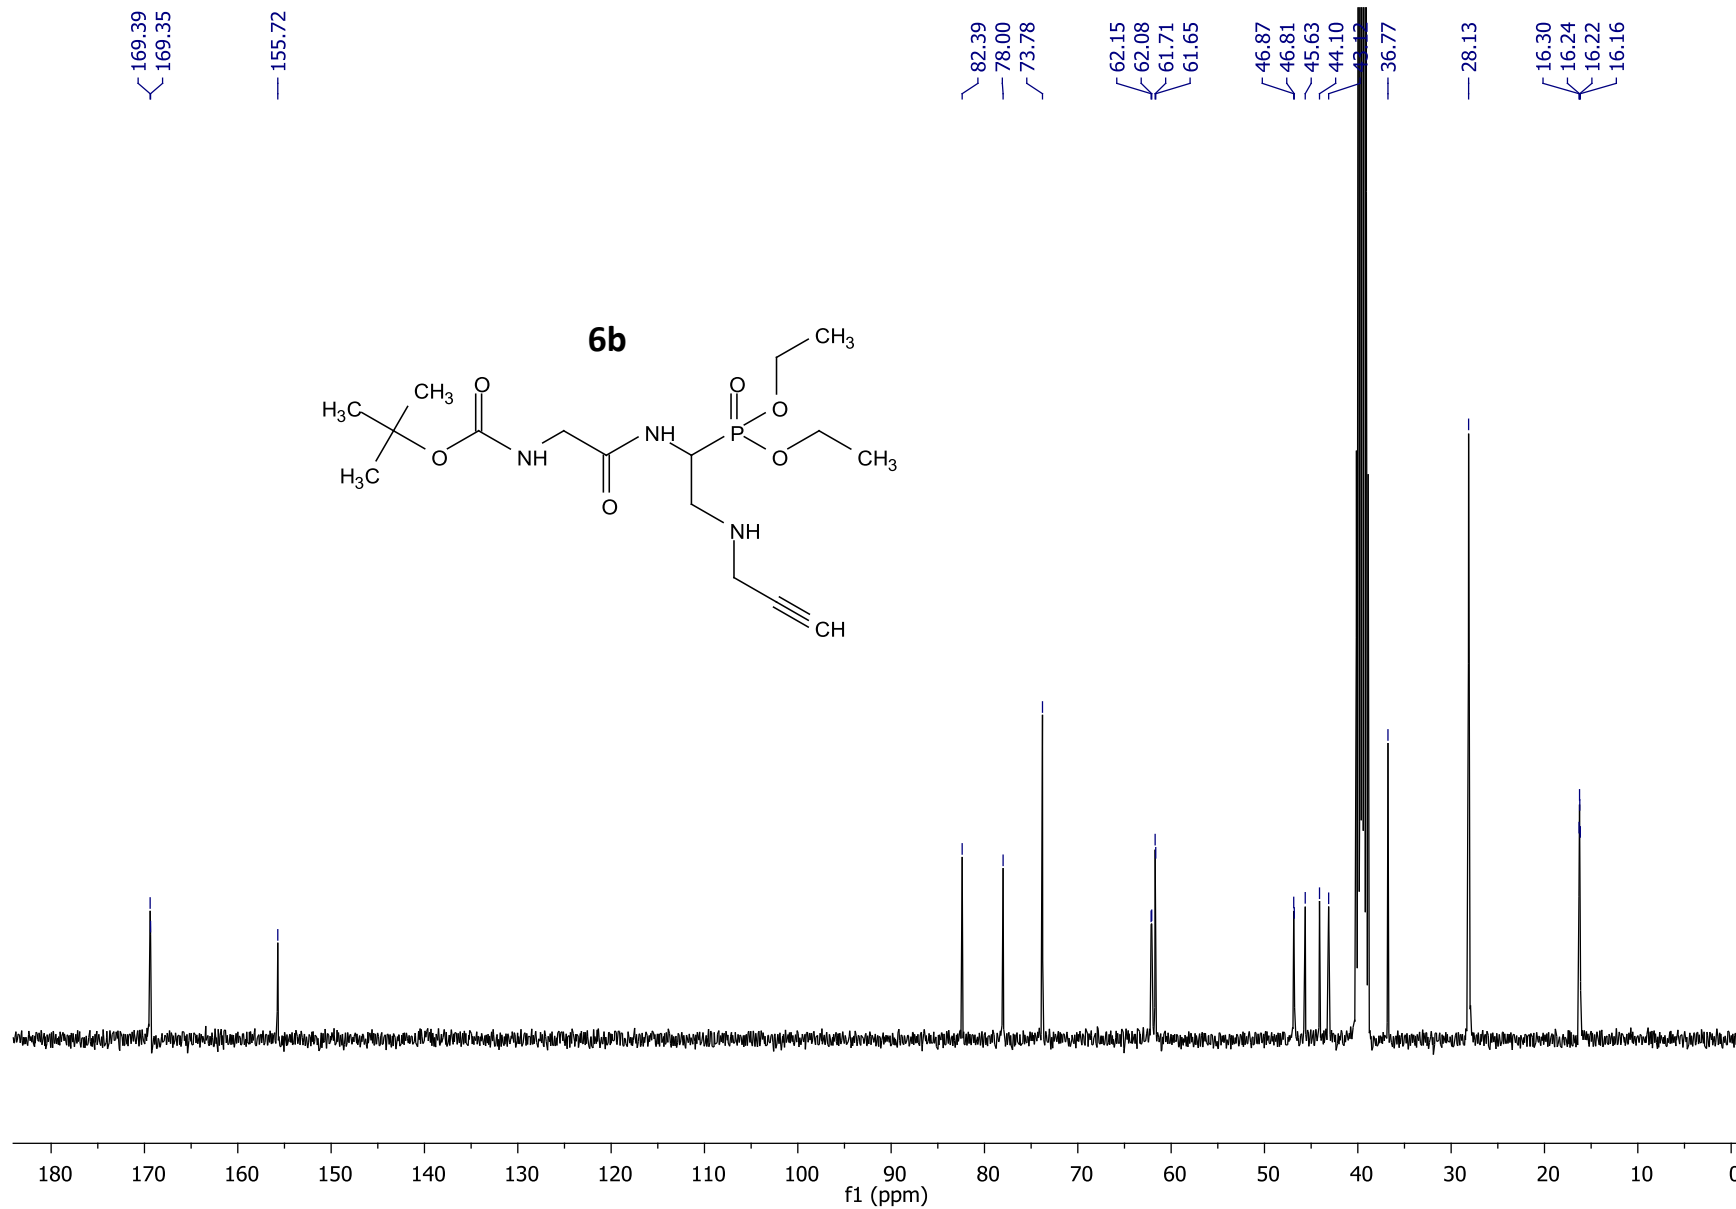

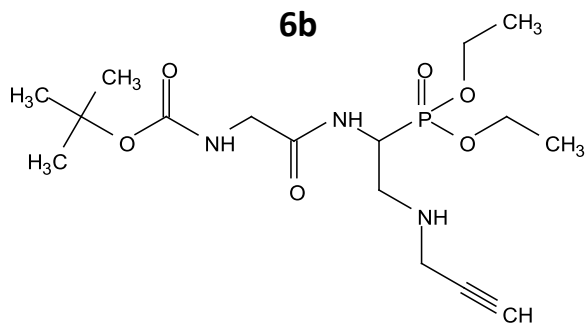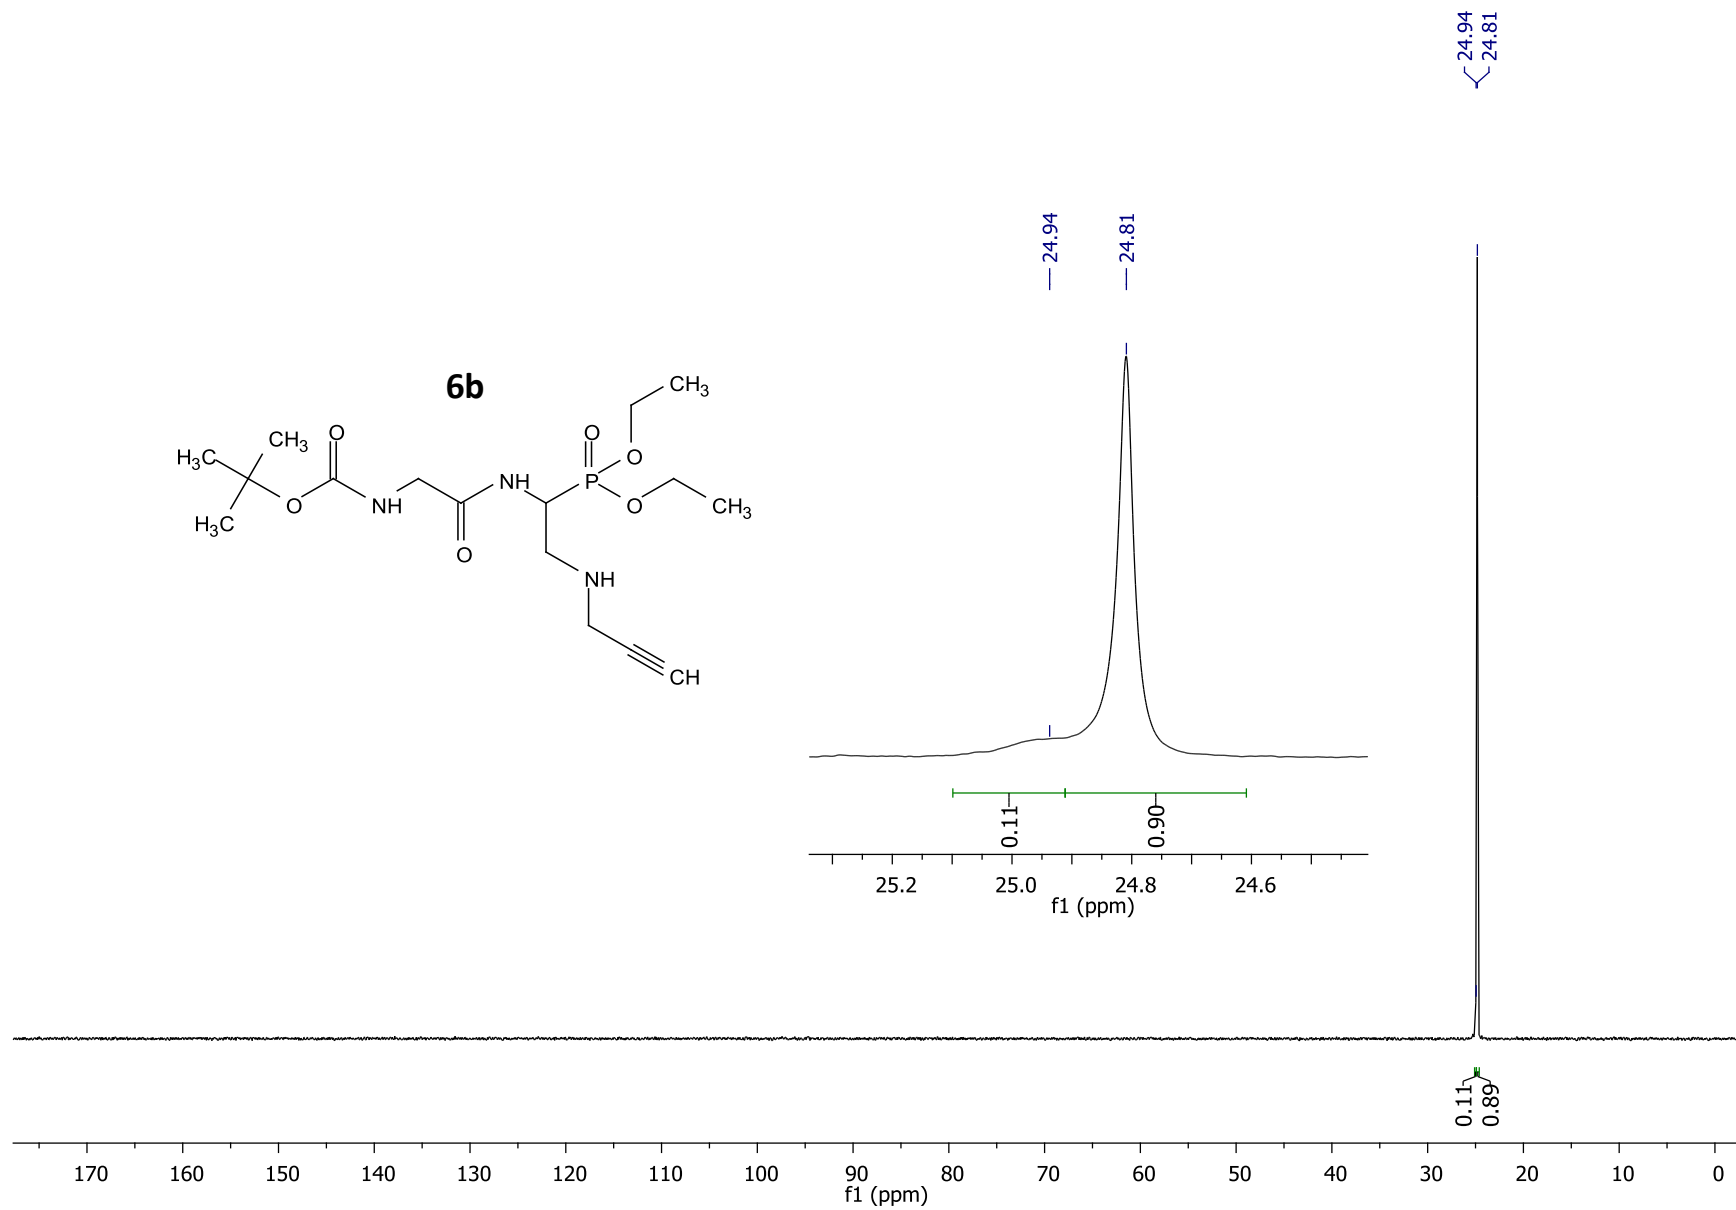

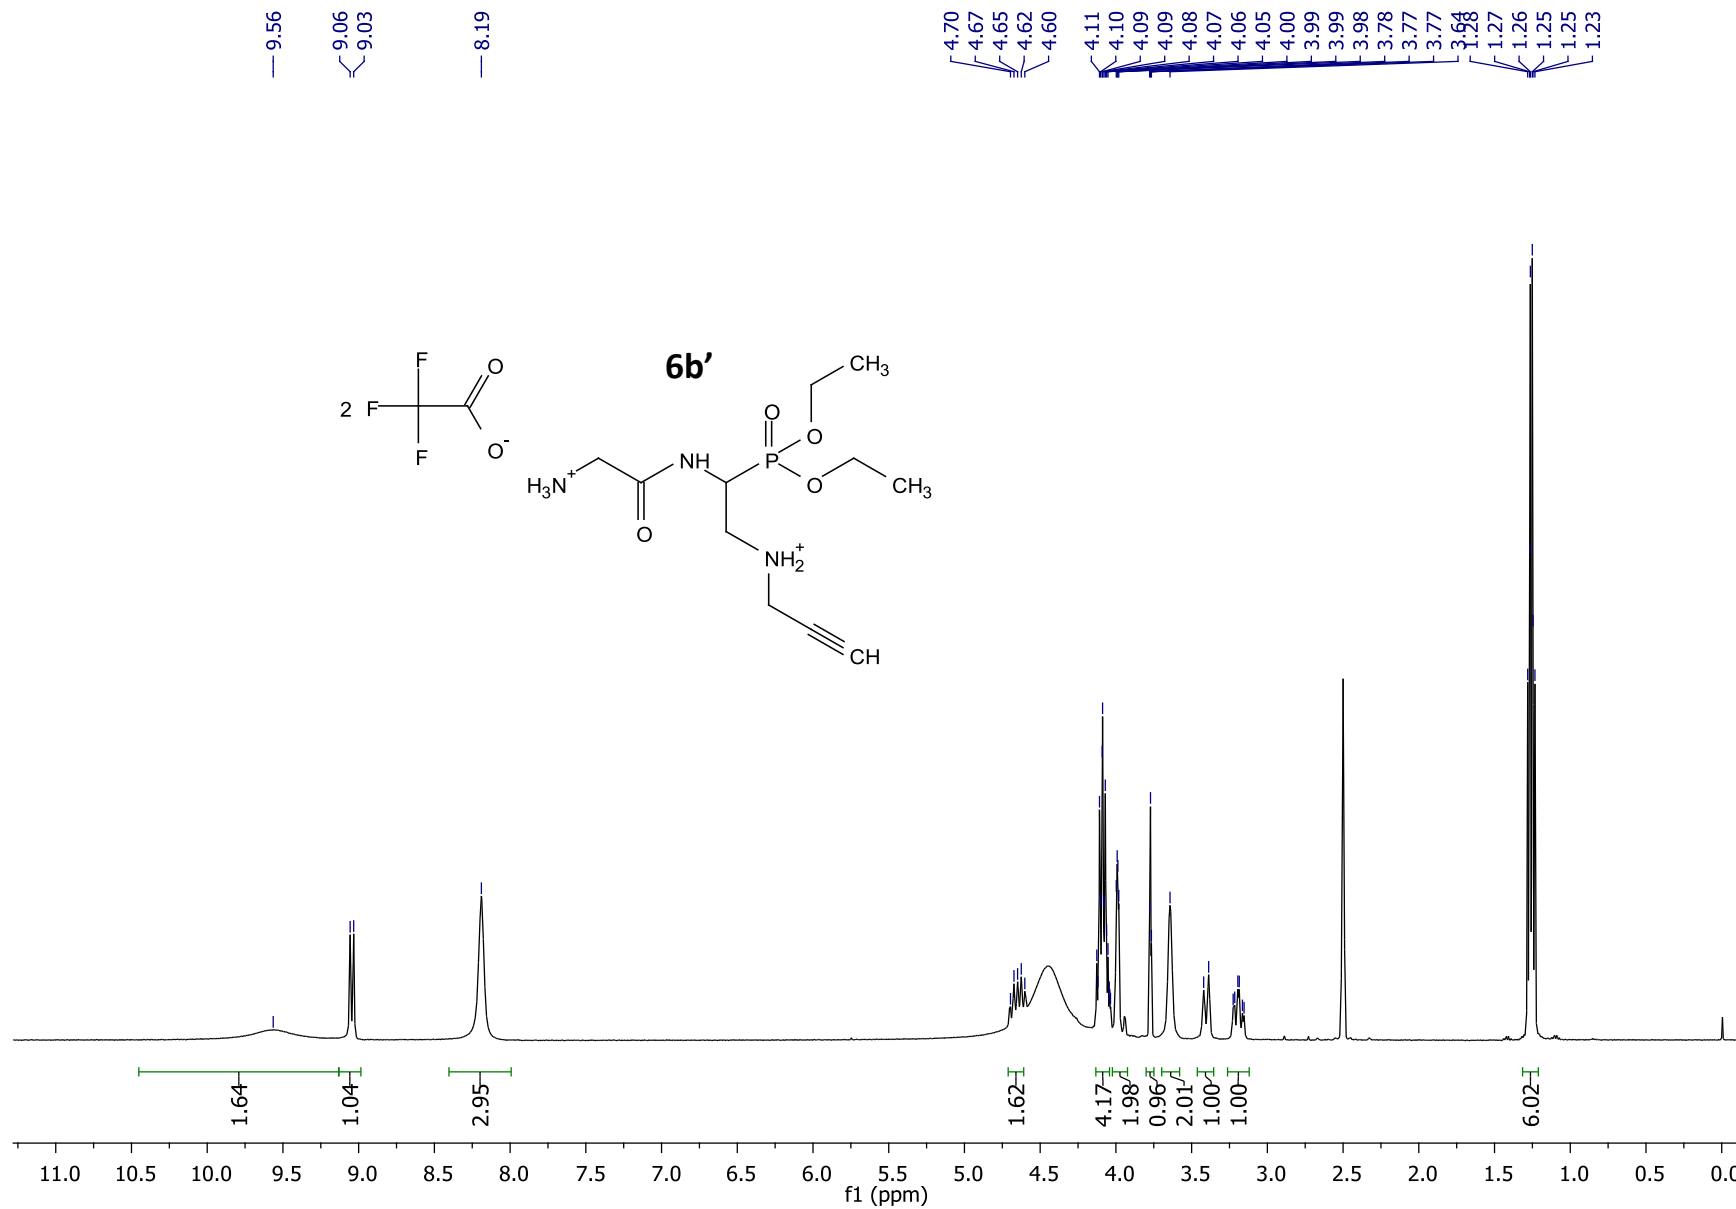

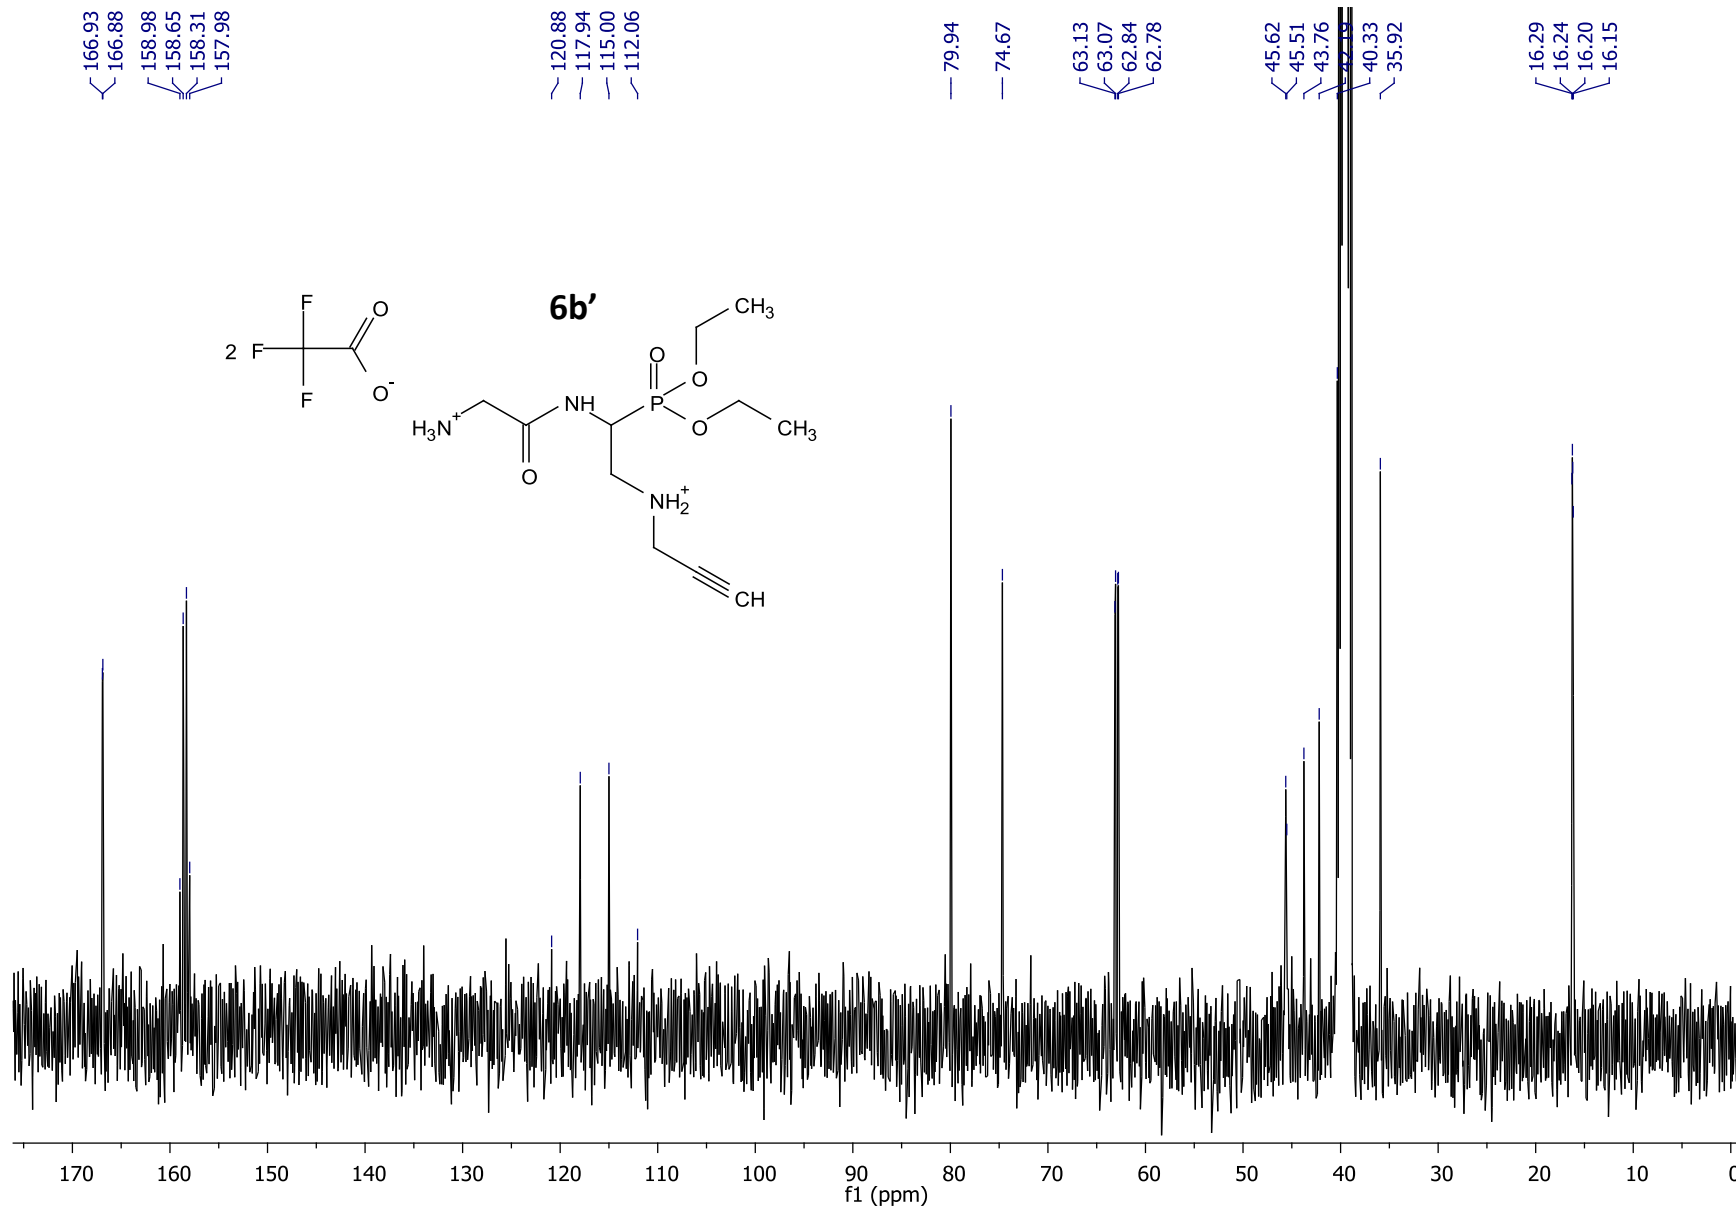

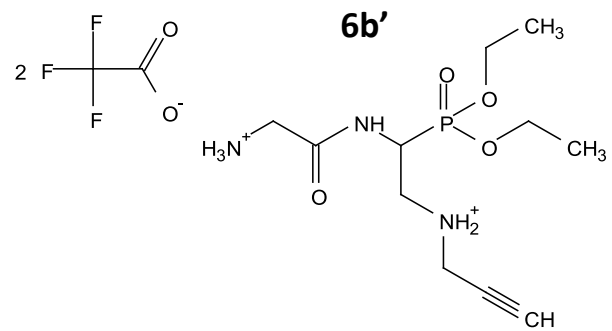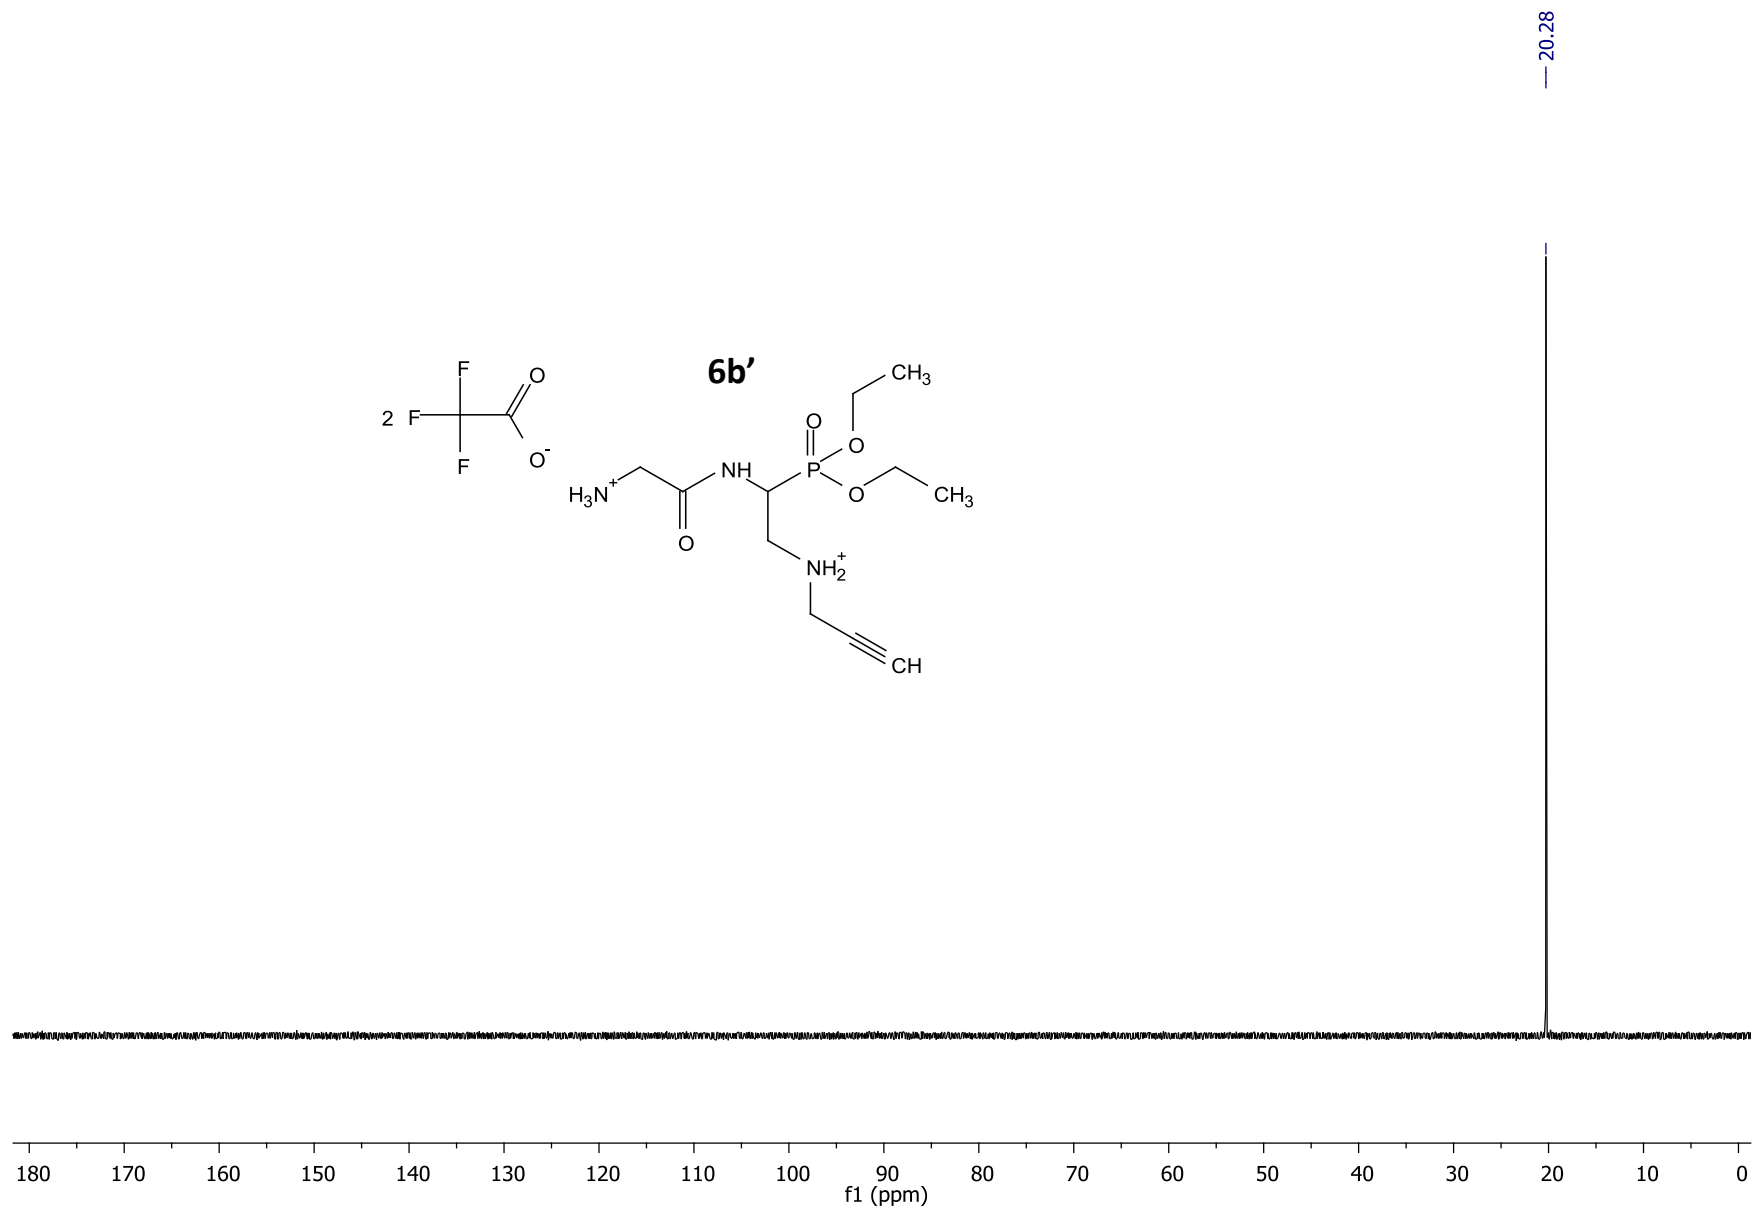

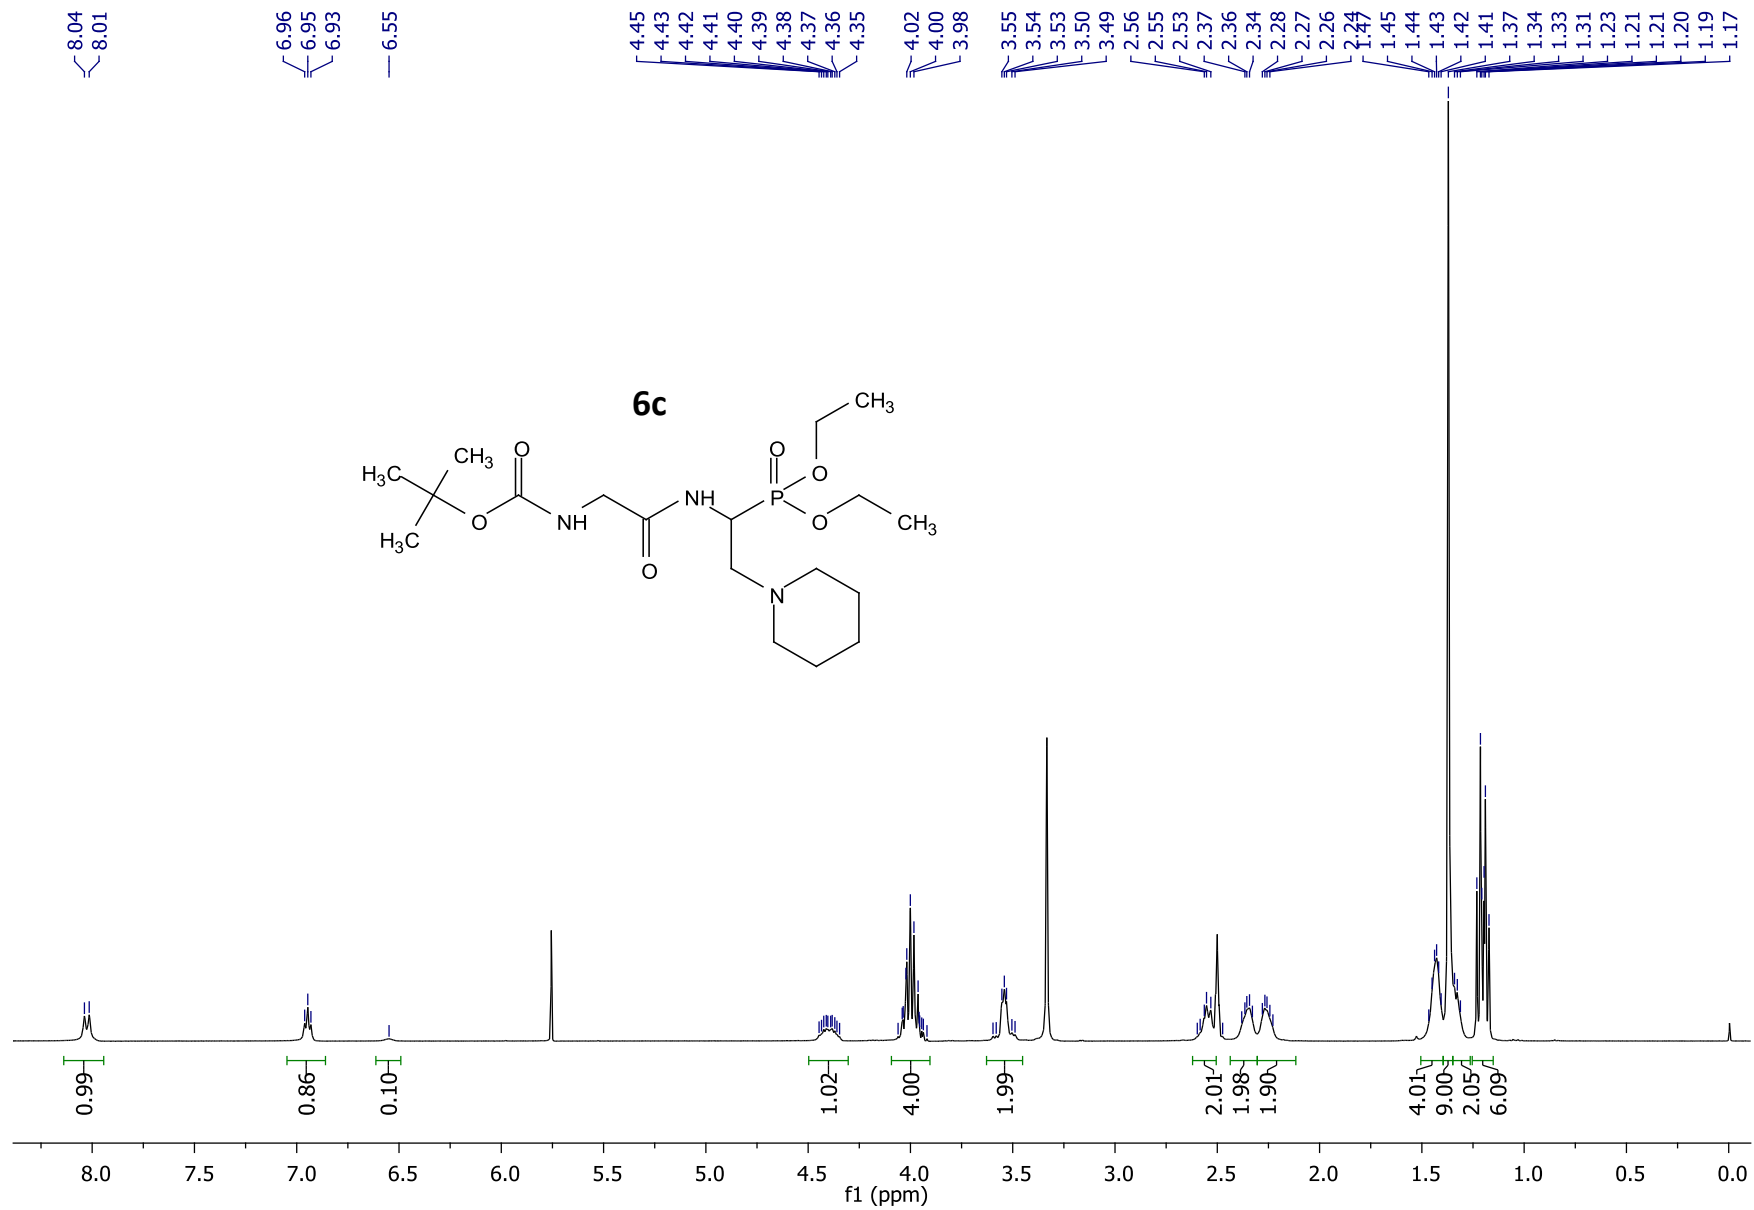

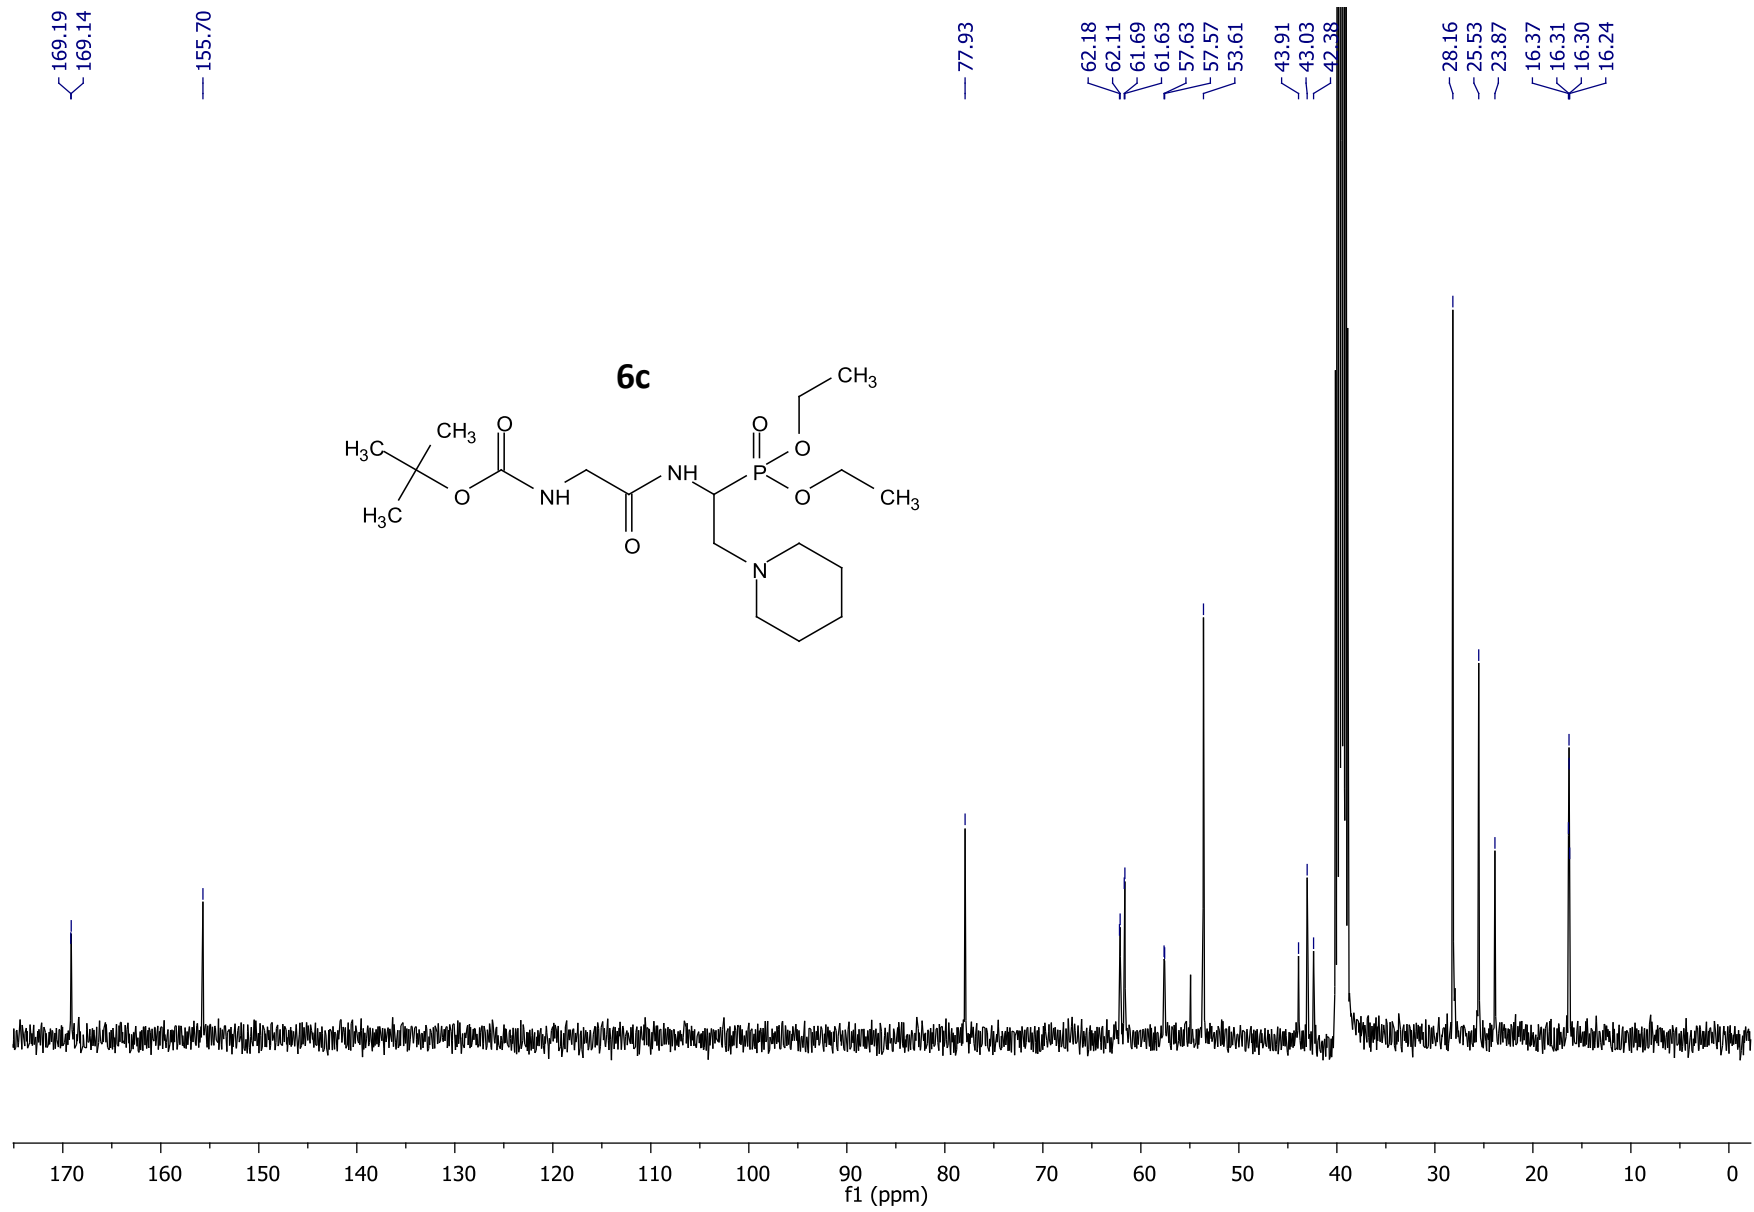

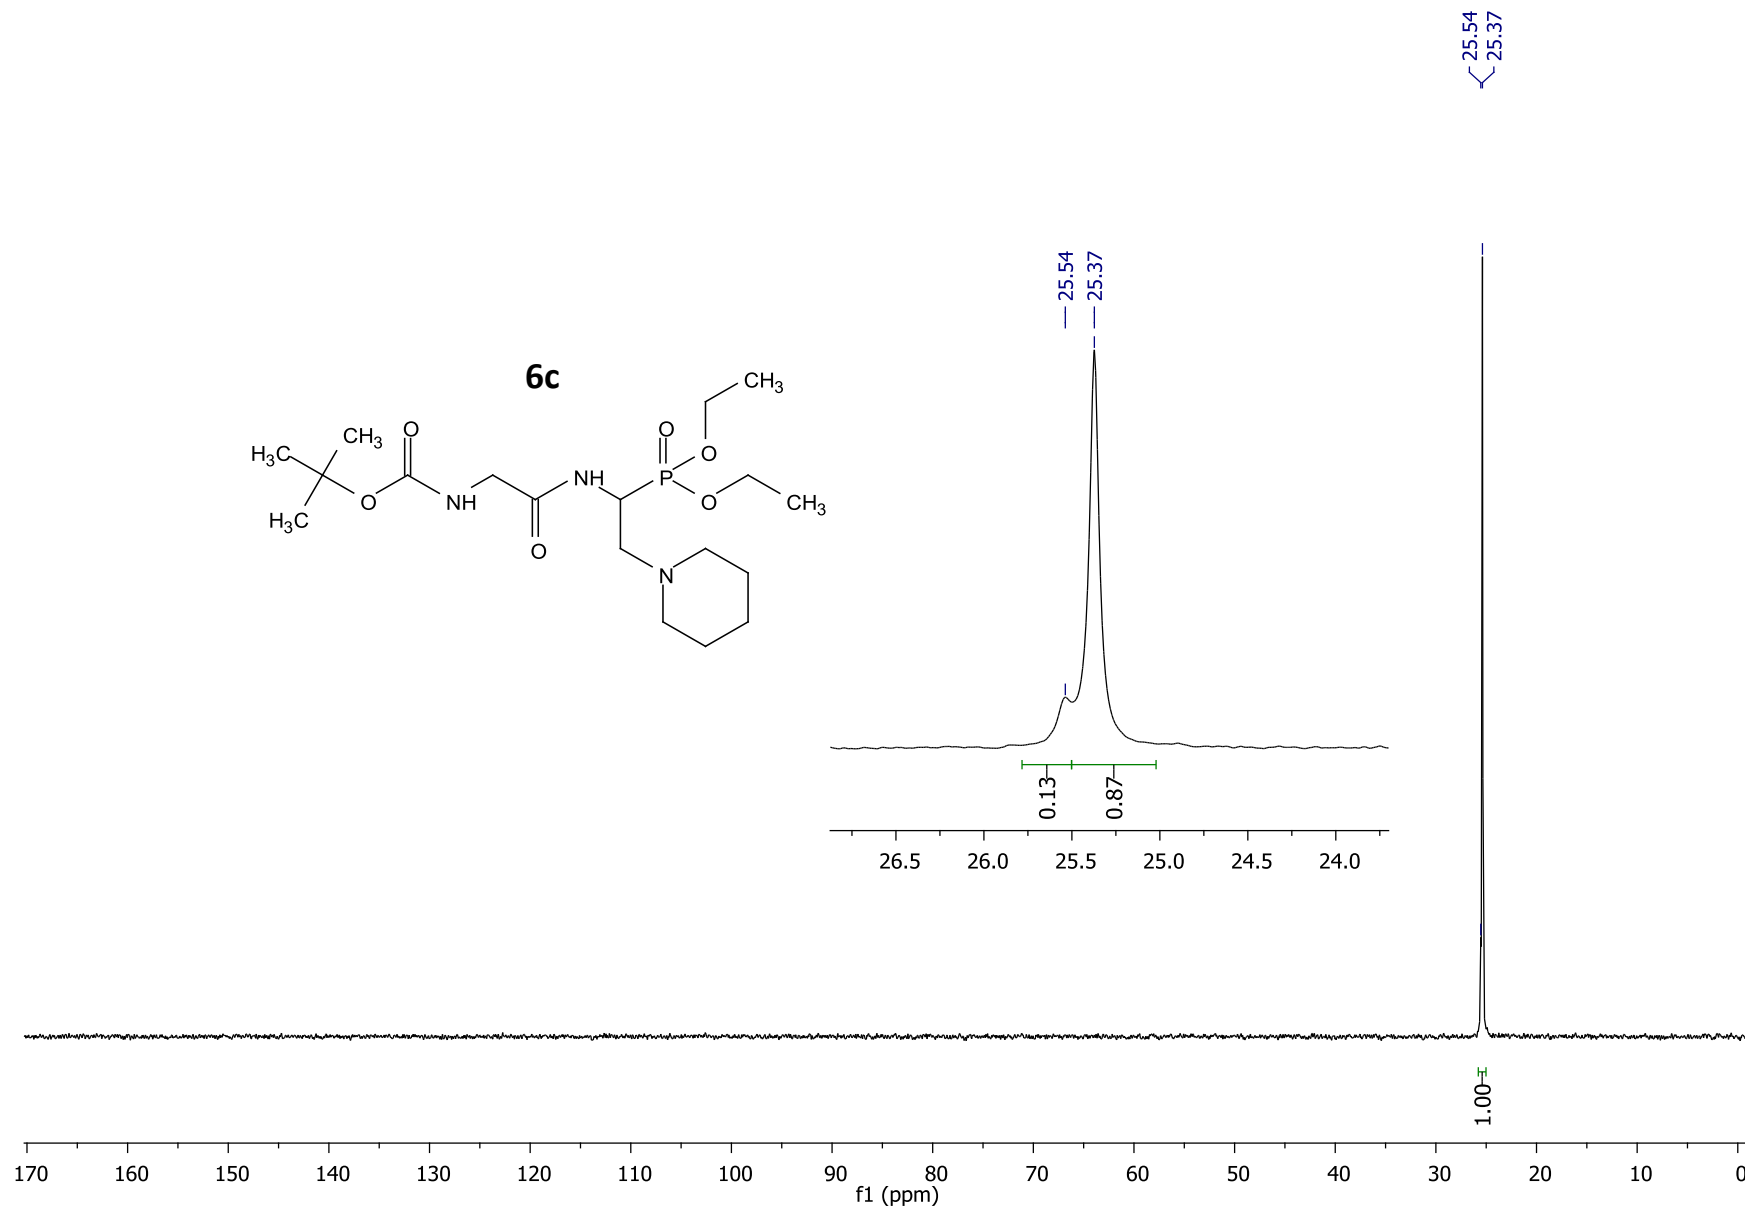



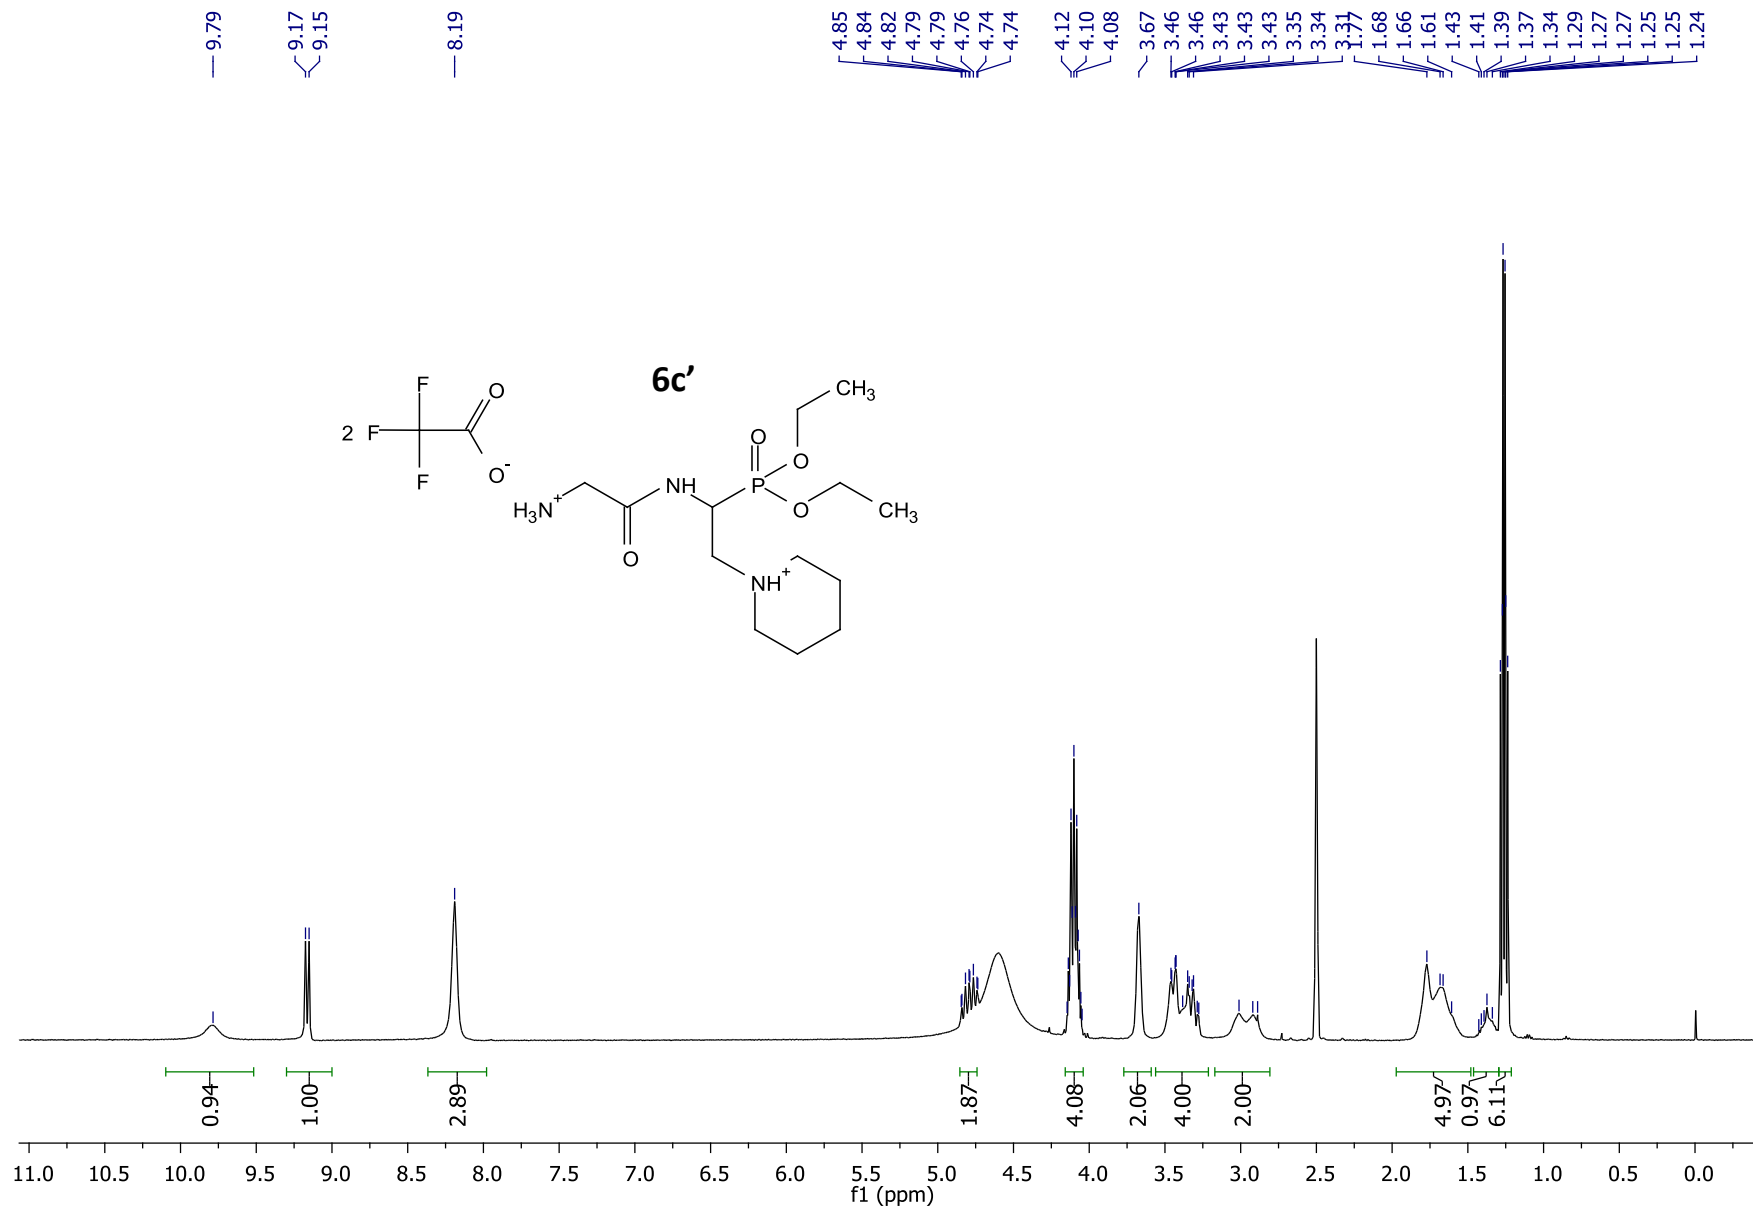

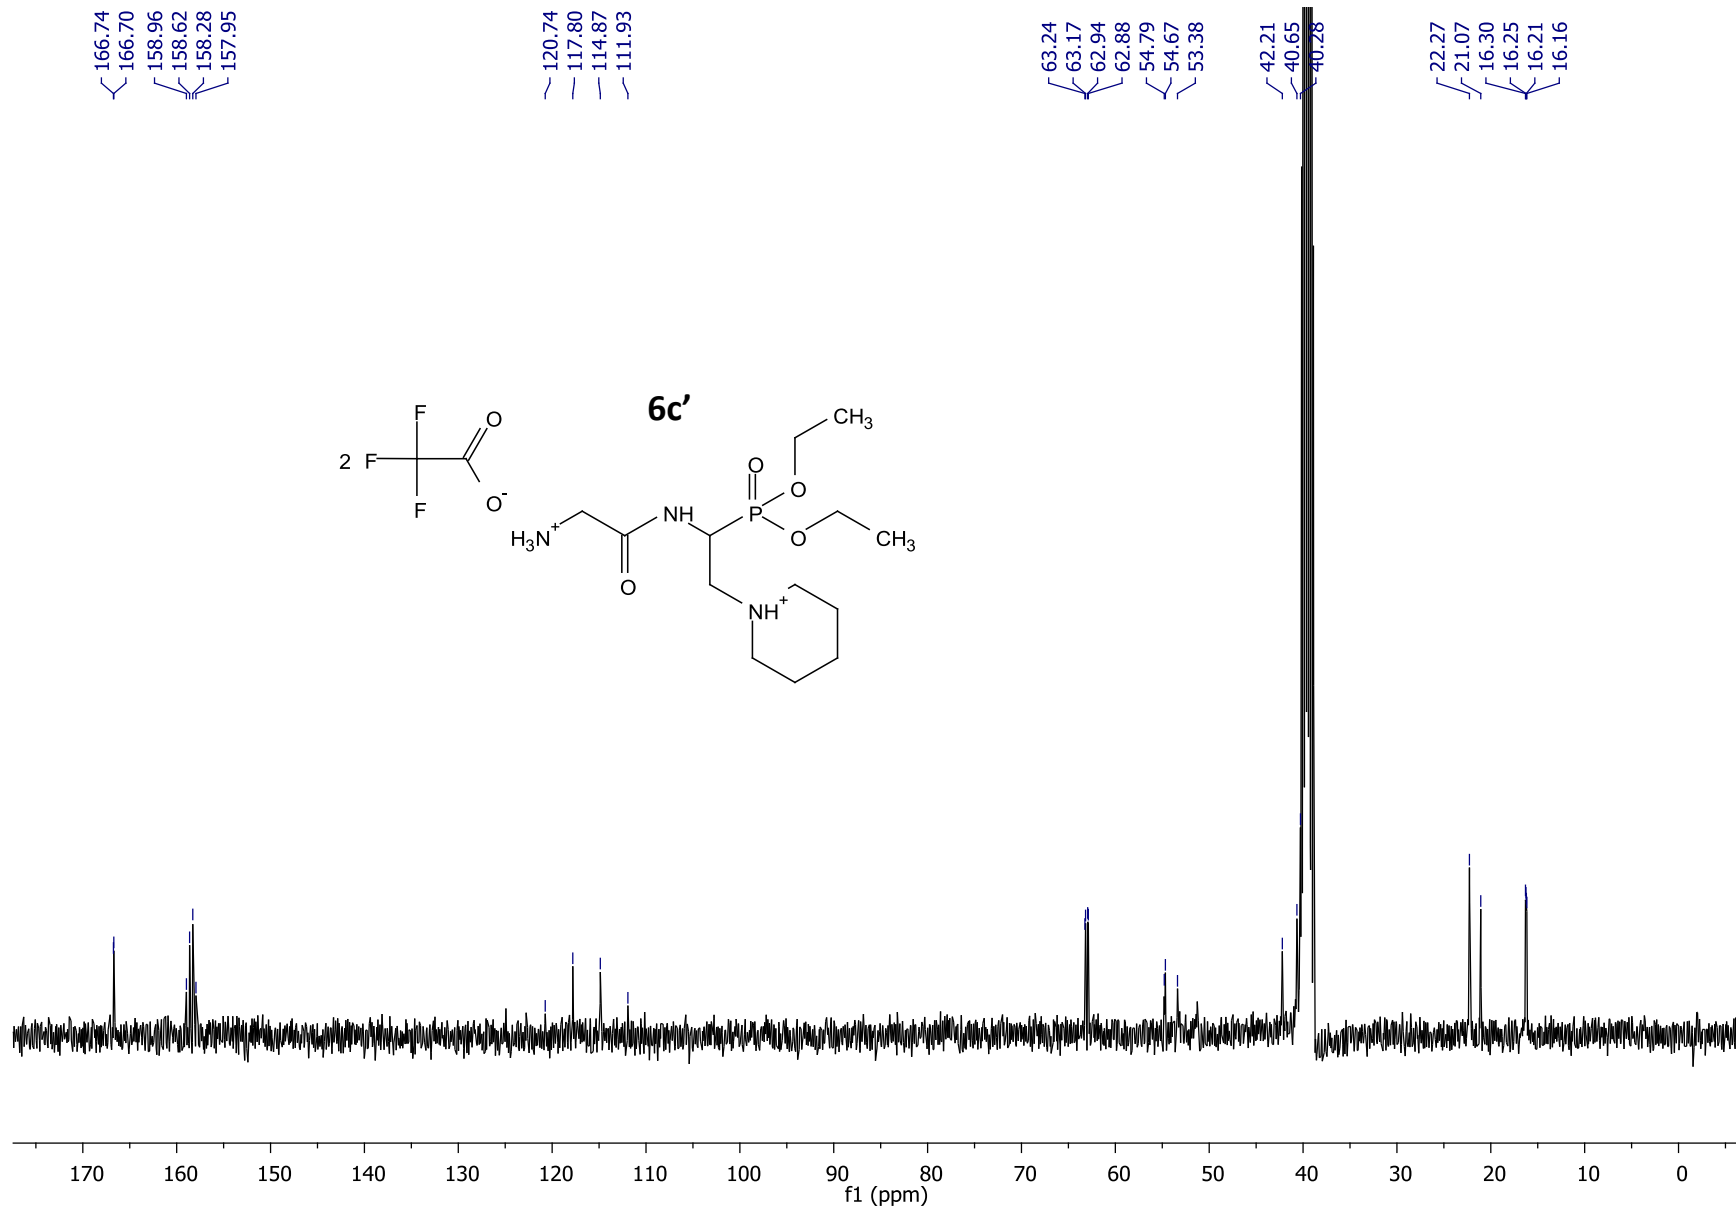

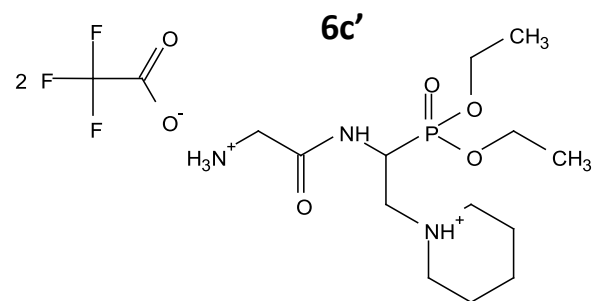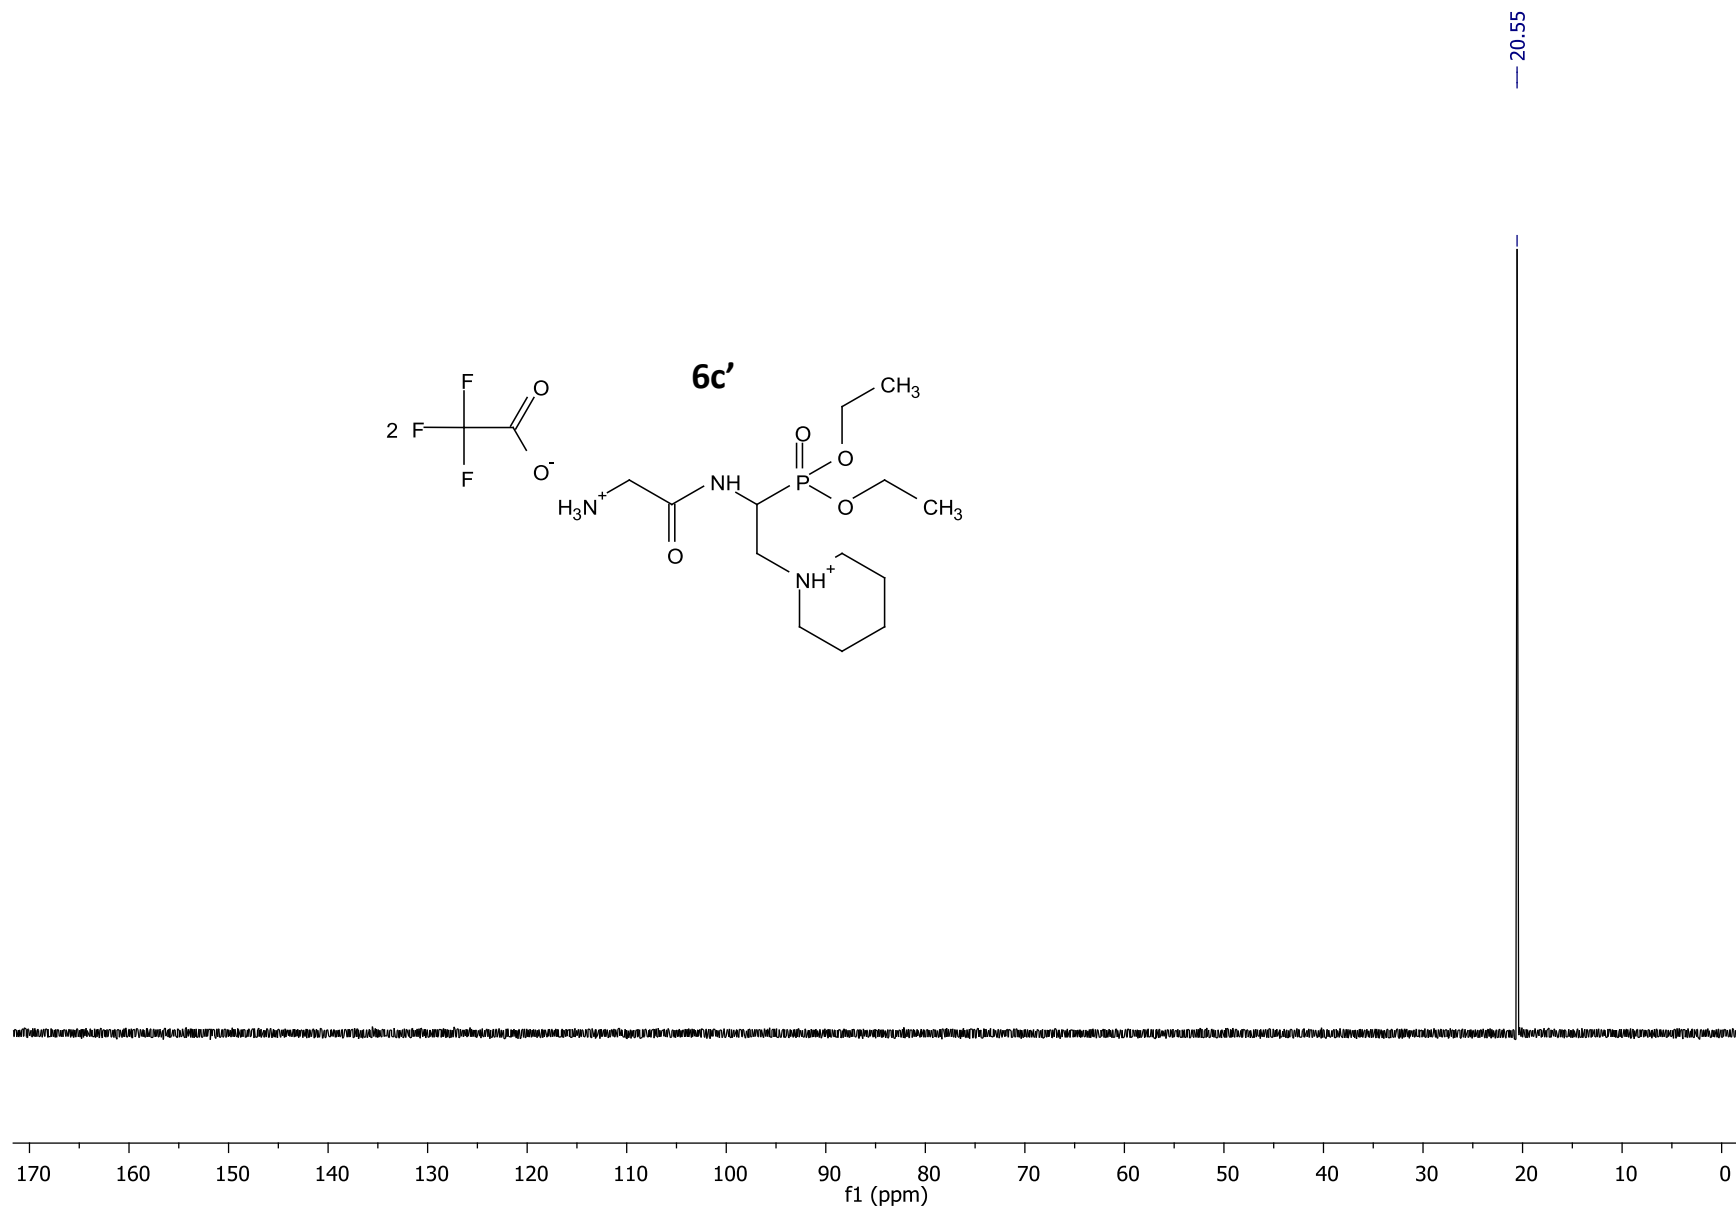

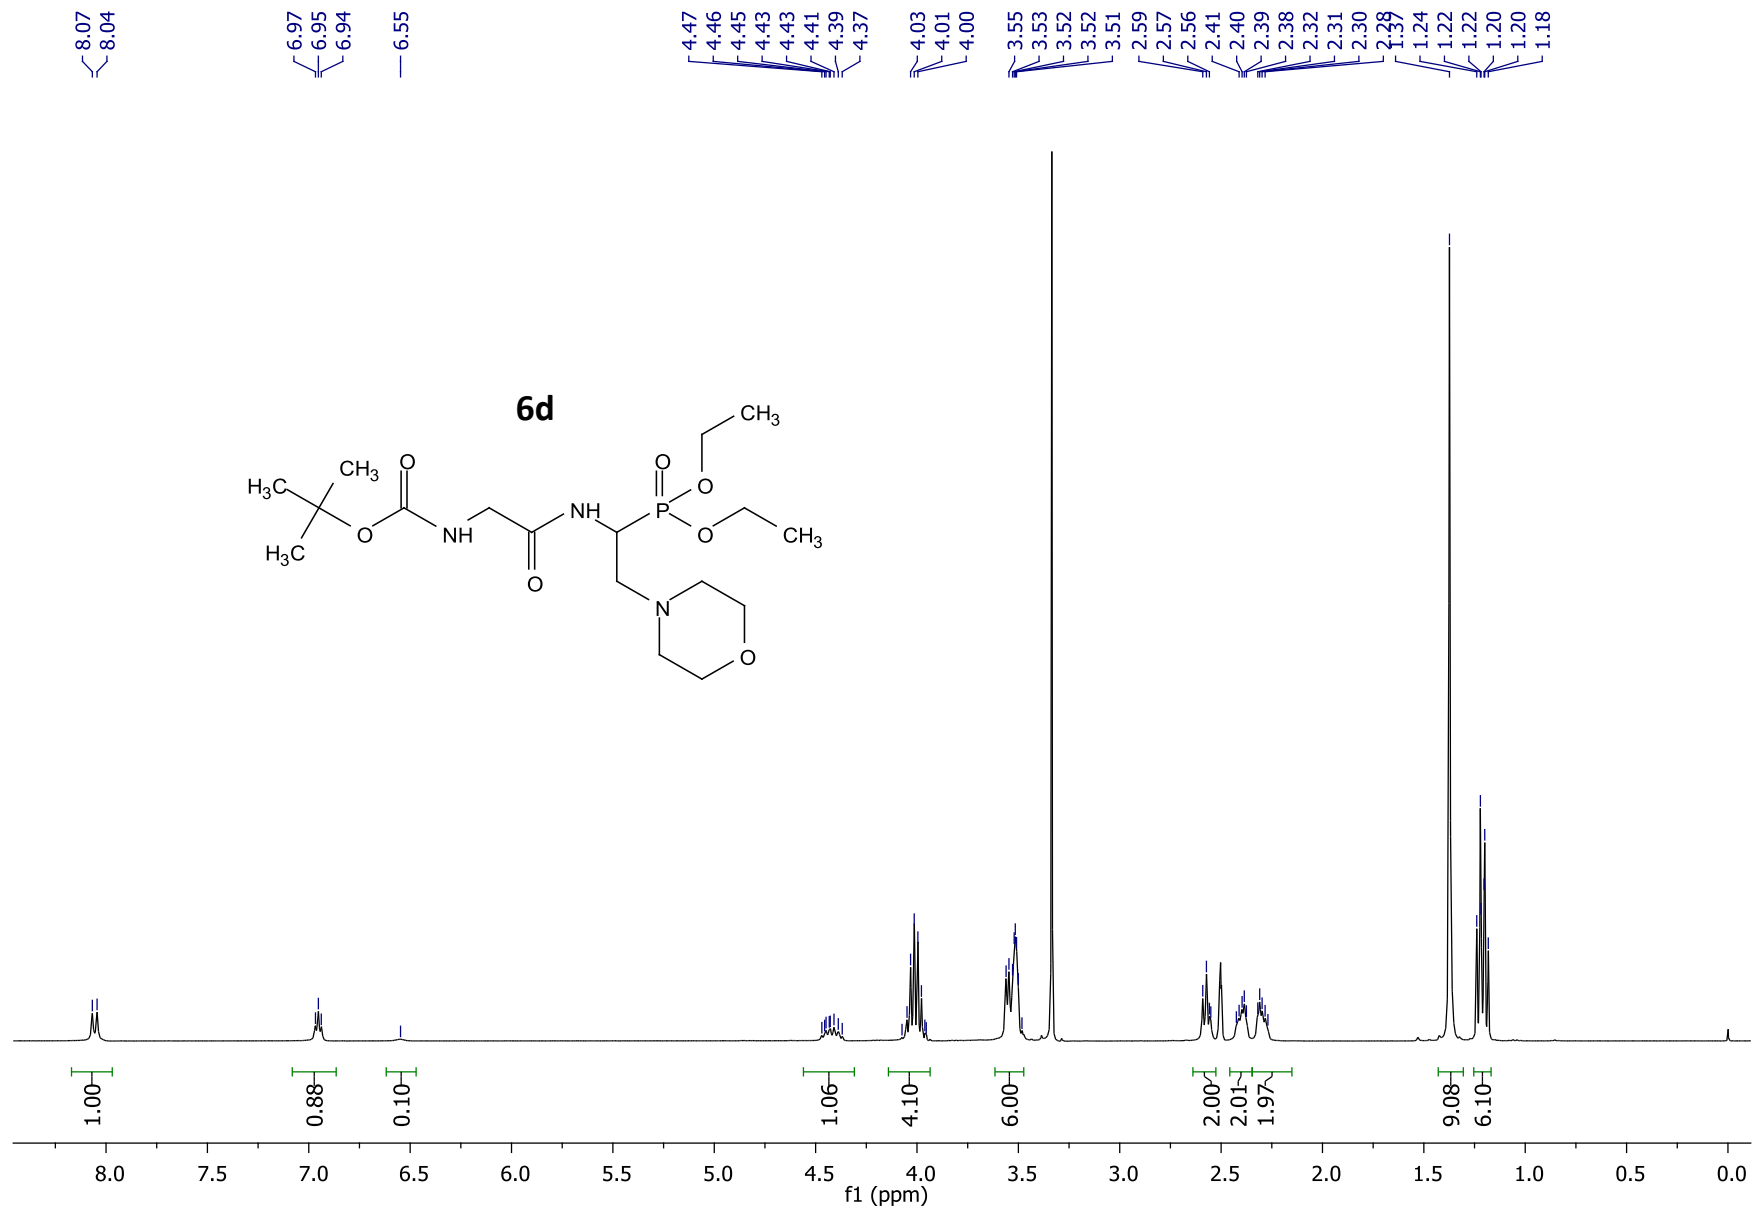

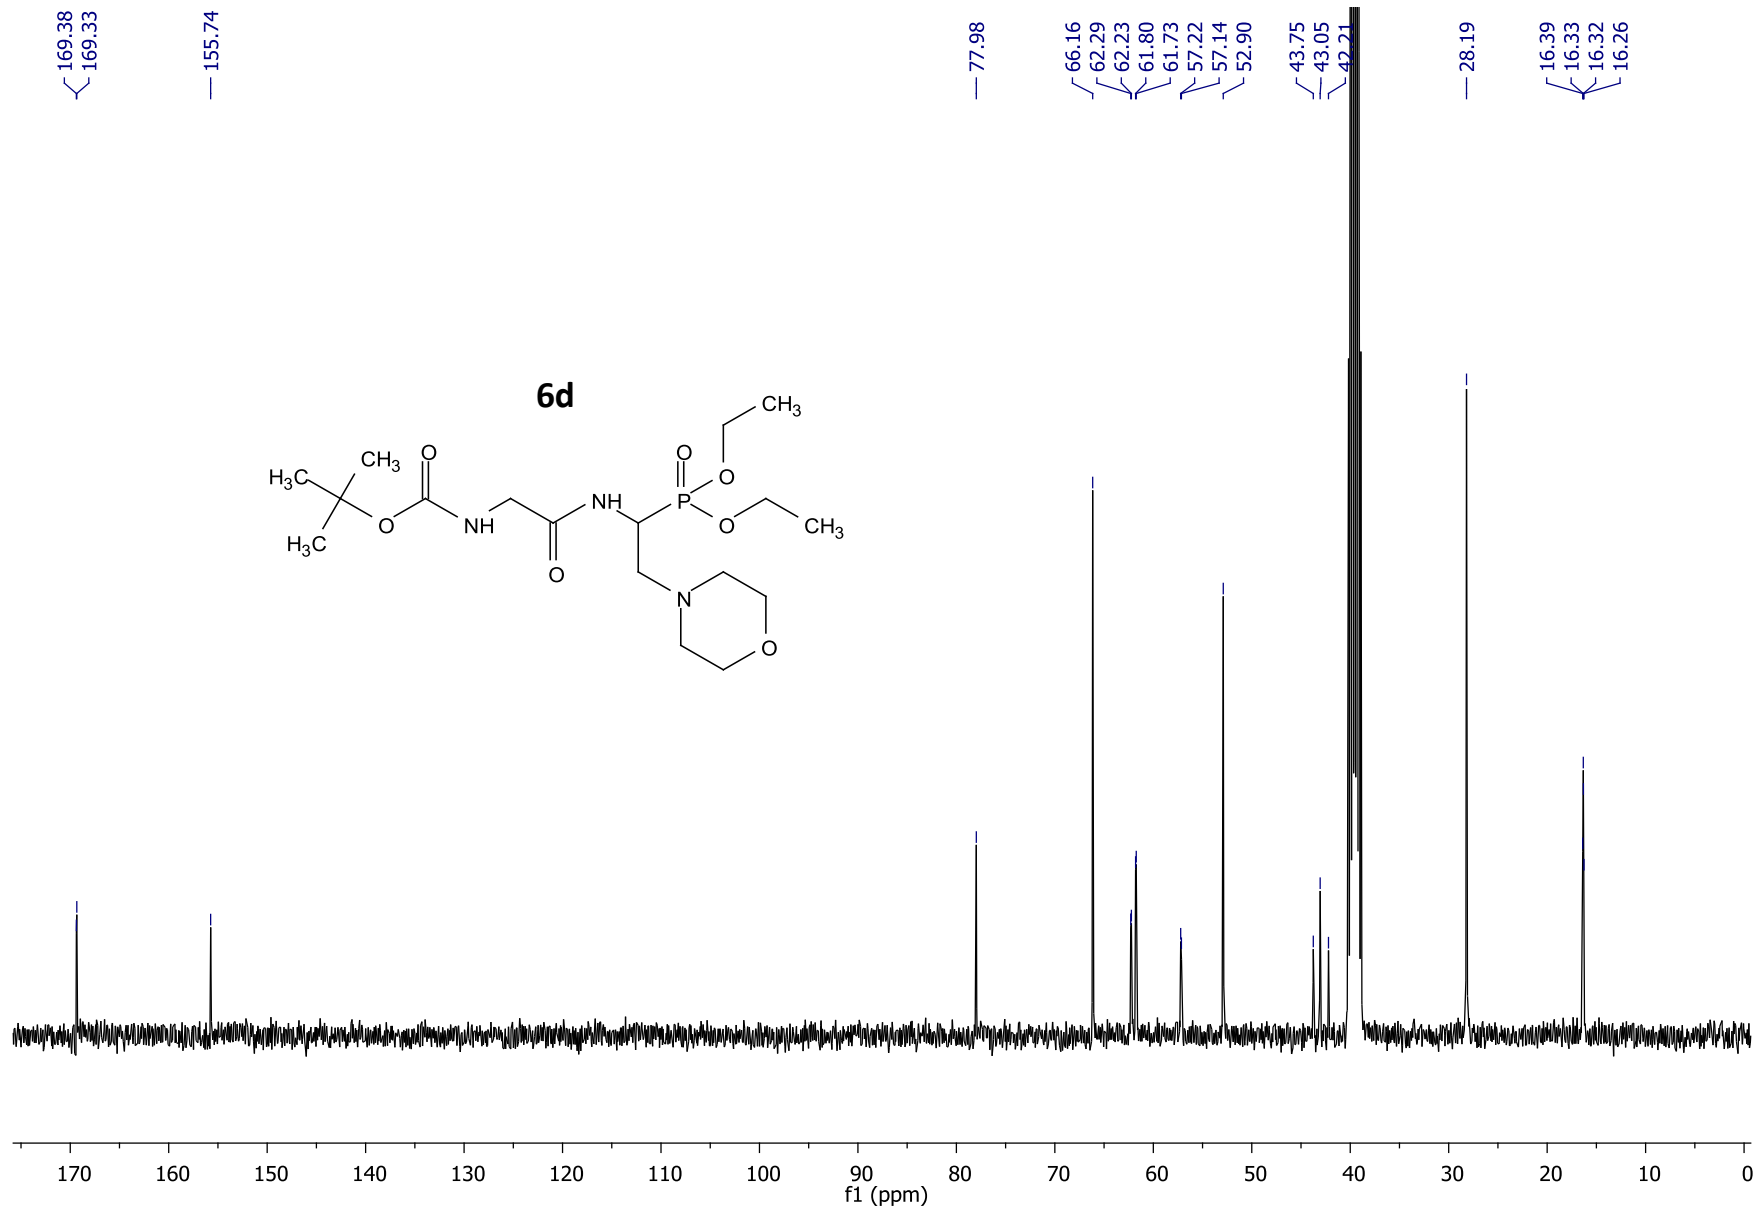

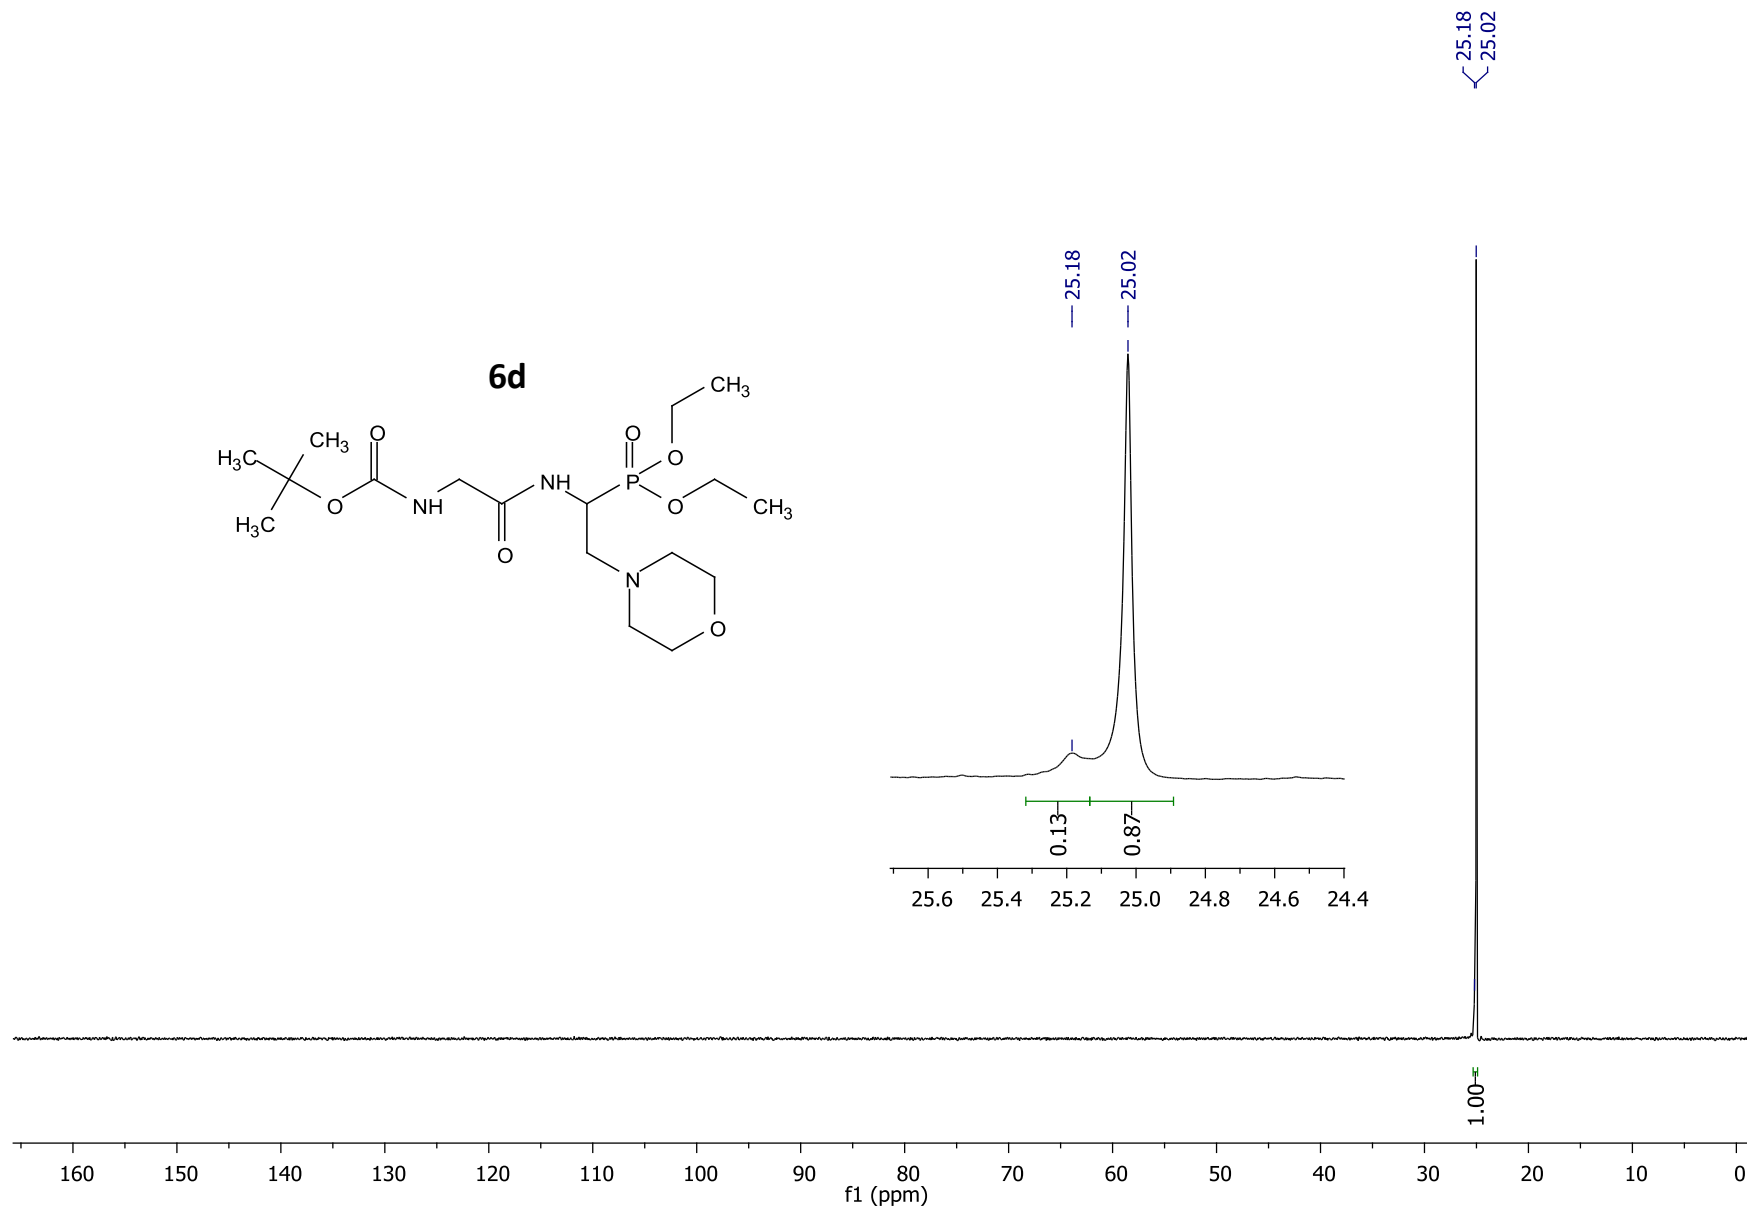

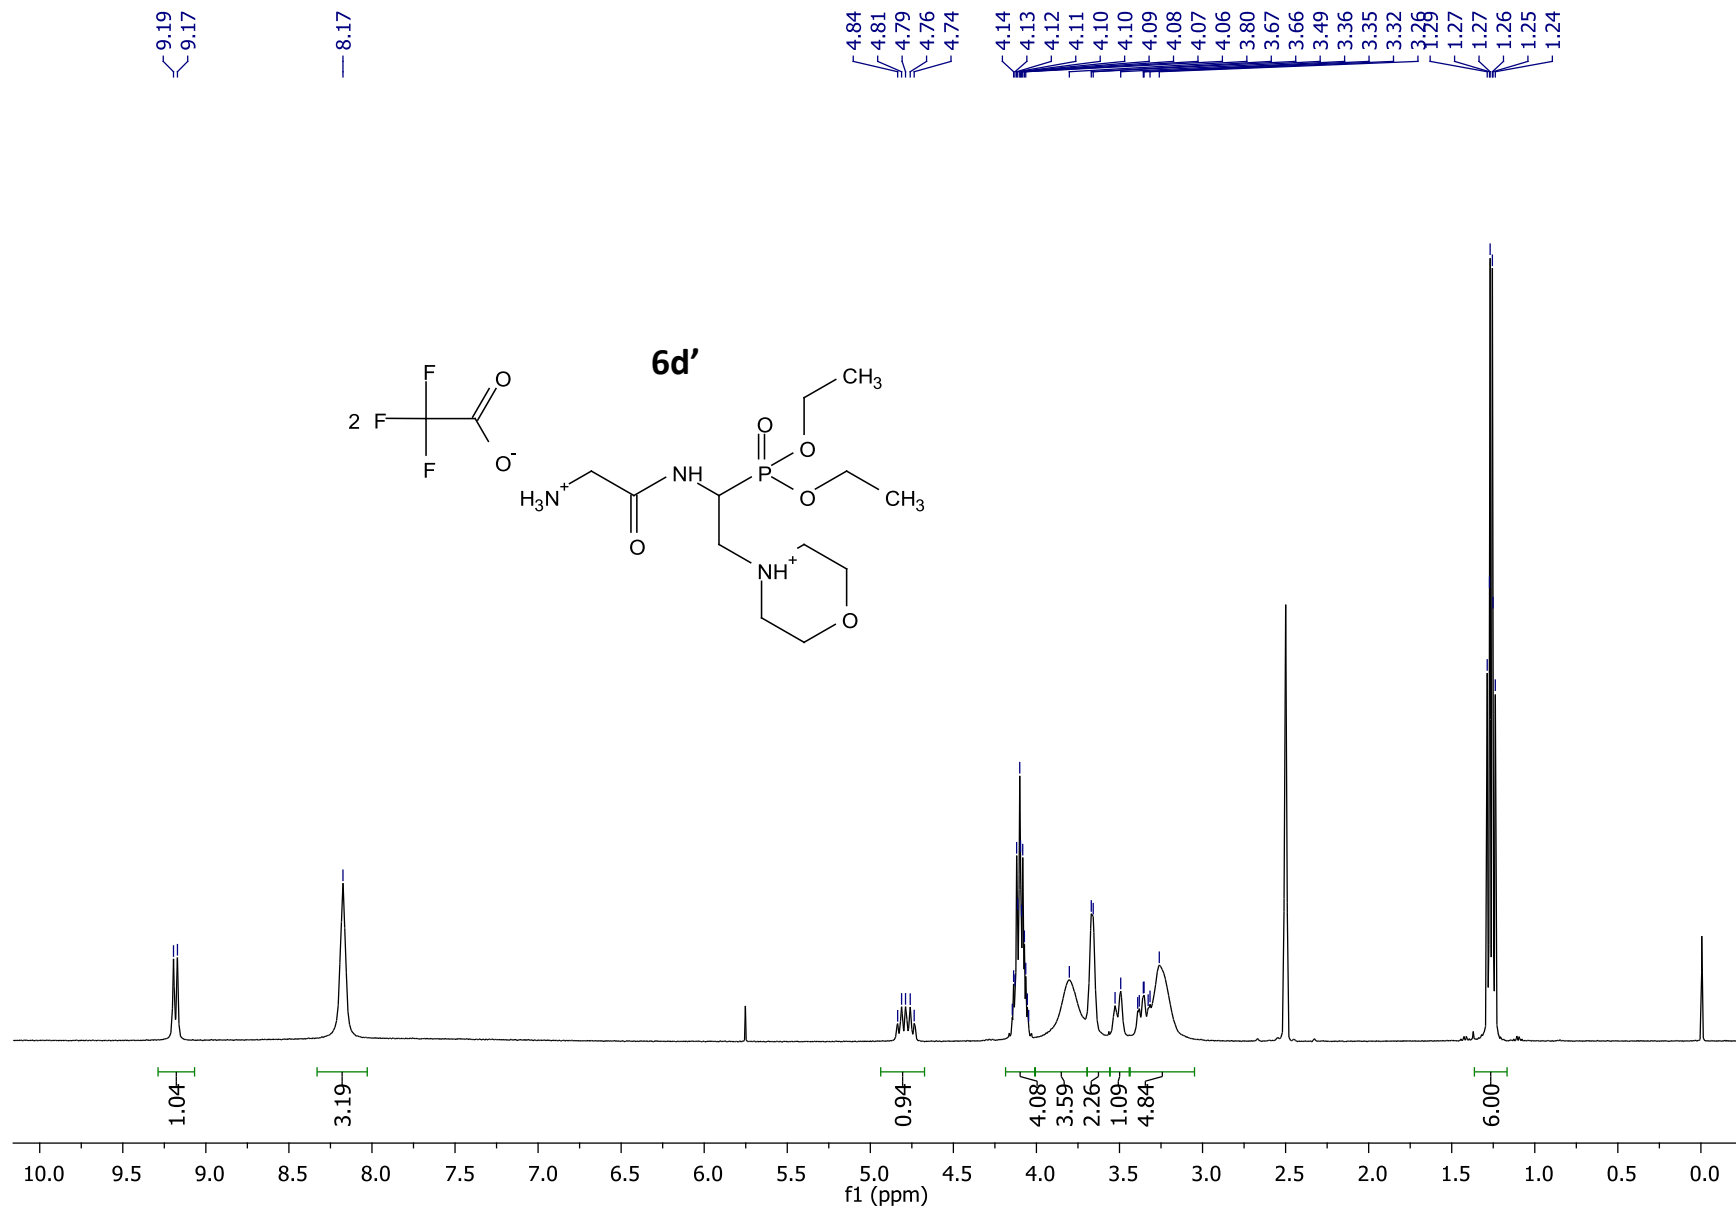

166.81  
166.77  
159.02  
158.68  
158.33  
157.98

120.53  
117.61  
114.69  
111.77

63.25  
63.23  
63.15  
62.93  
62.87  
54.97  
54.85  
51.30

42.10  
40.55  
40.25

16.32  
16.27  
16.22  
16.17

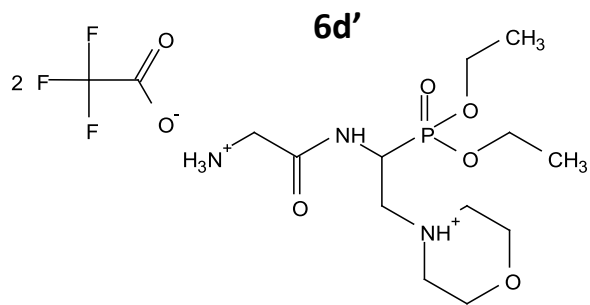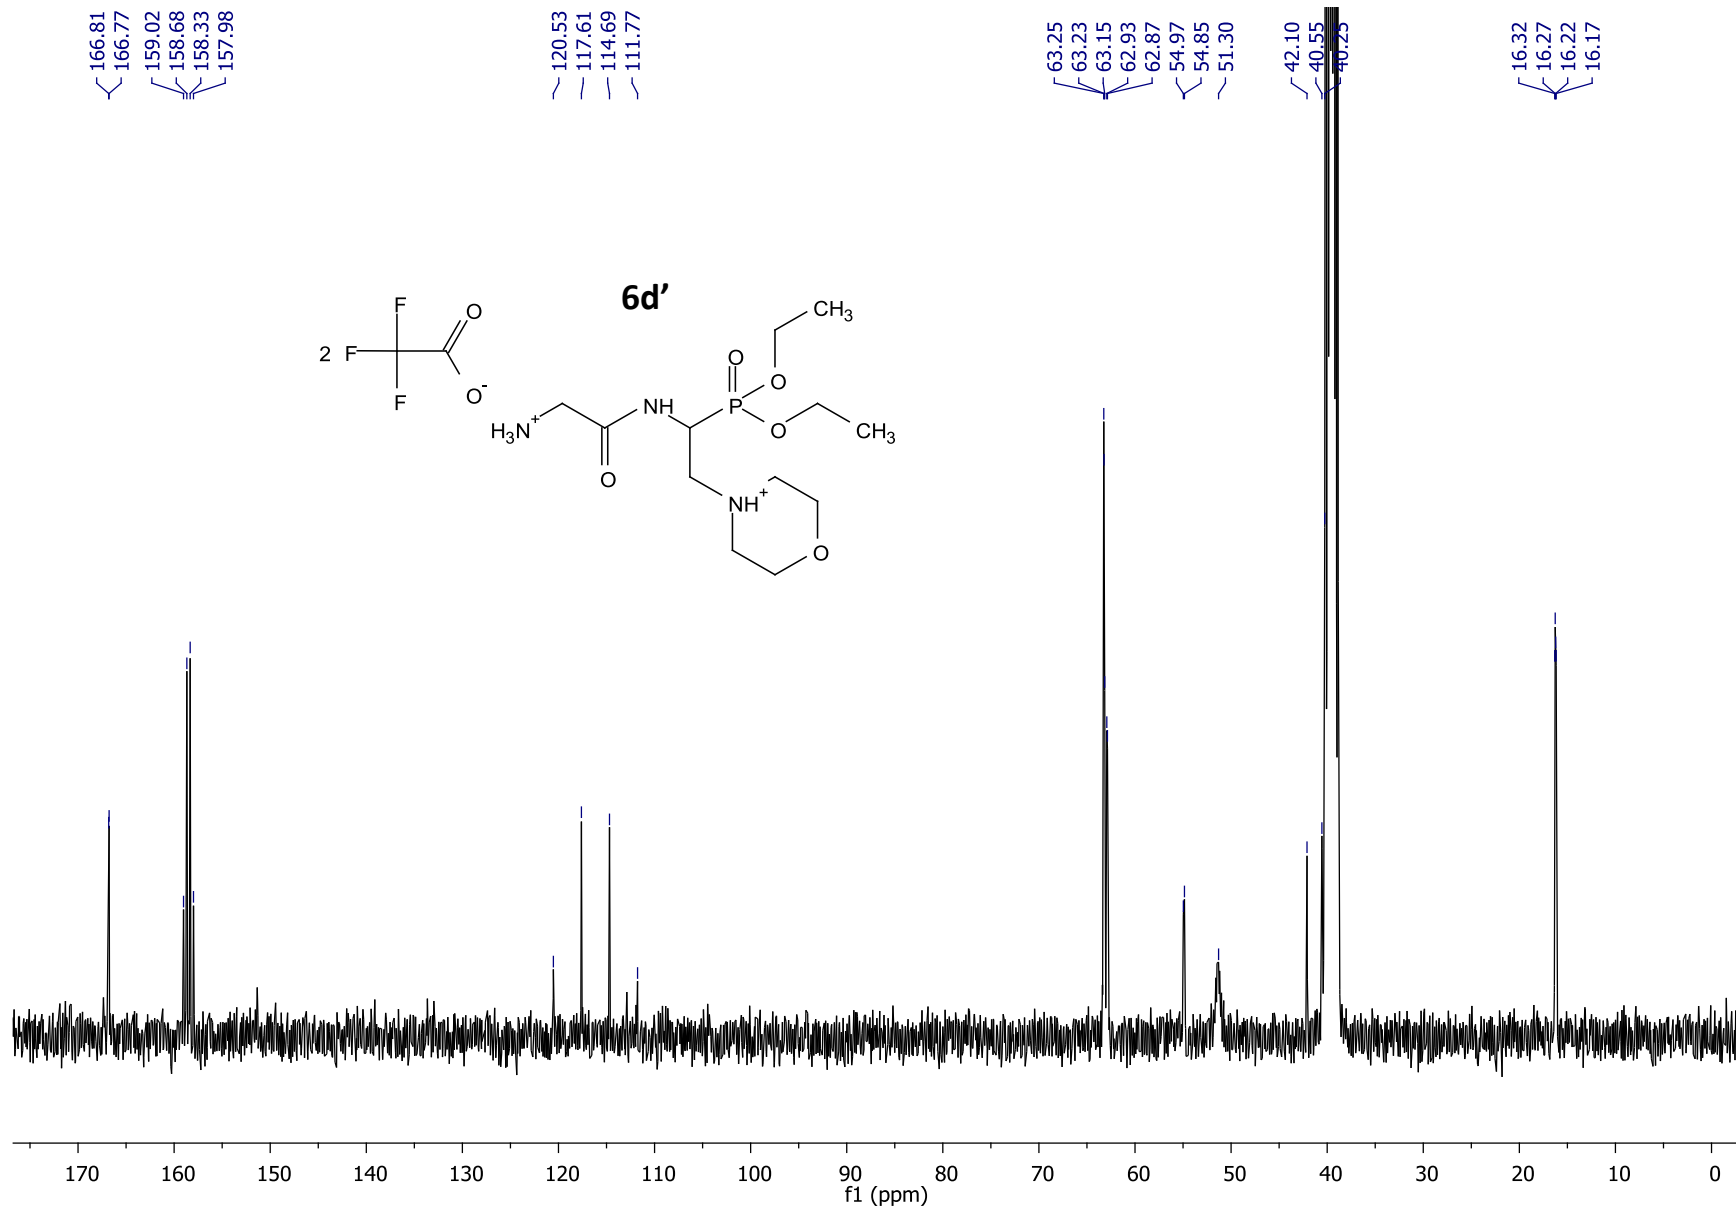



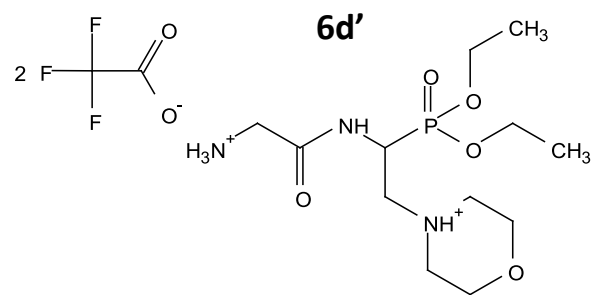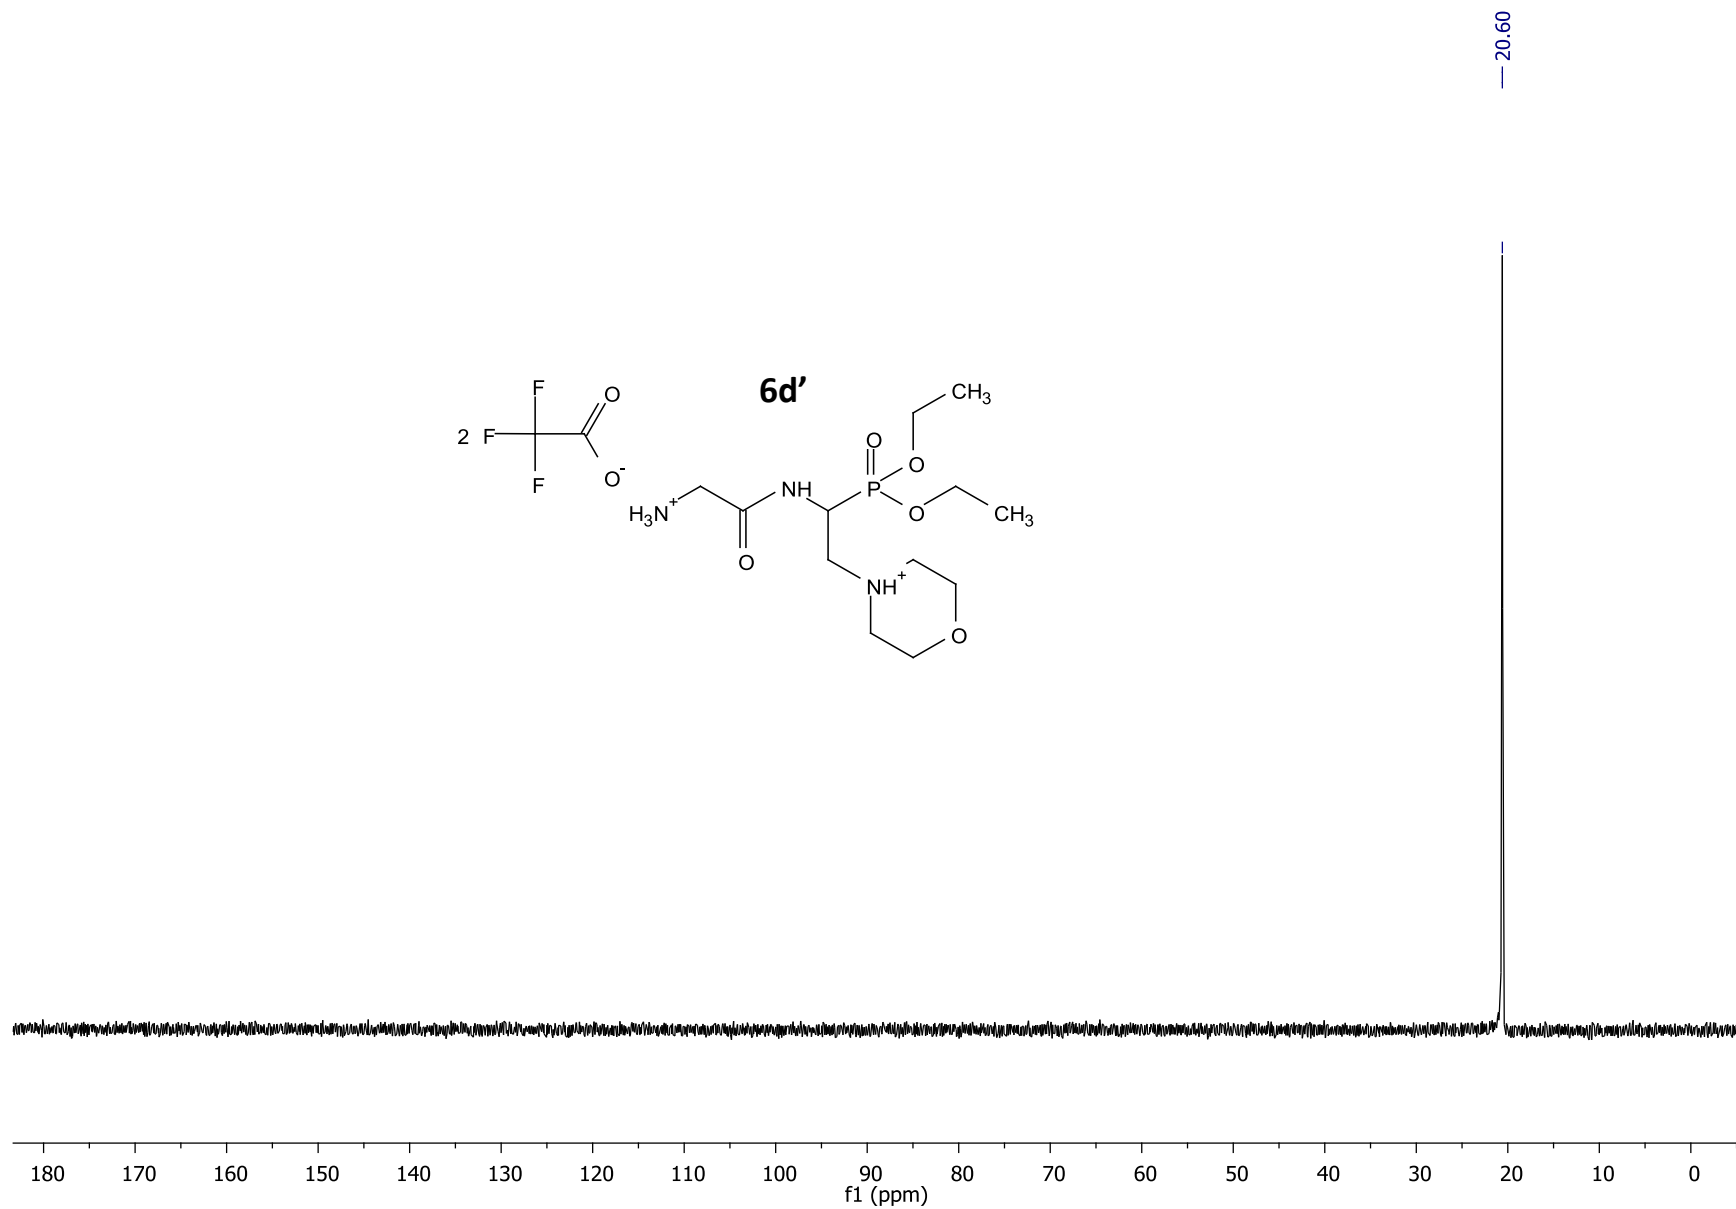

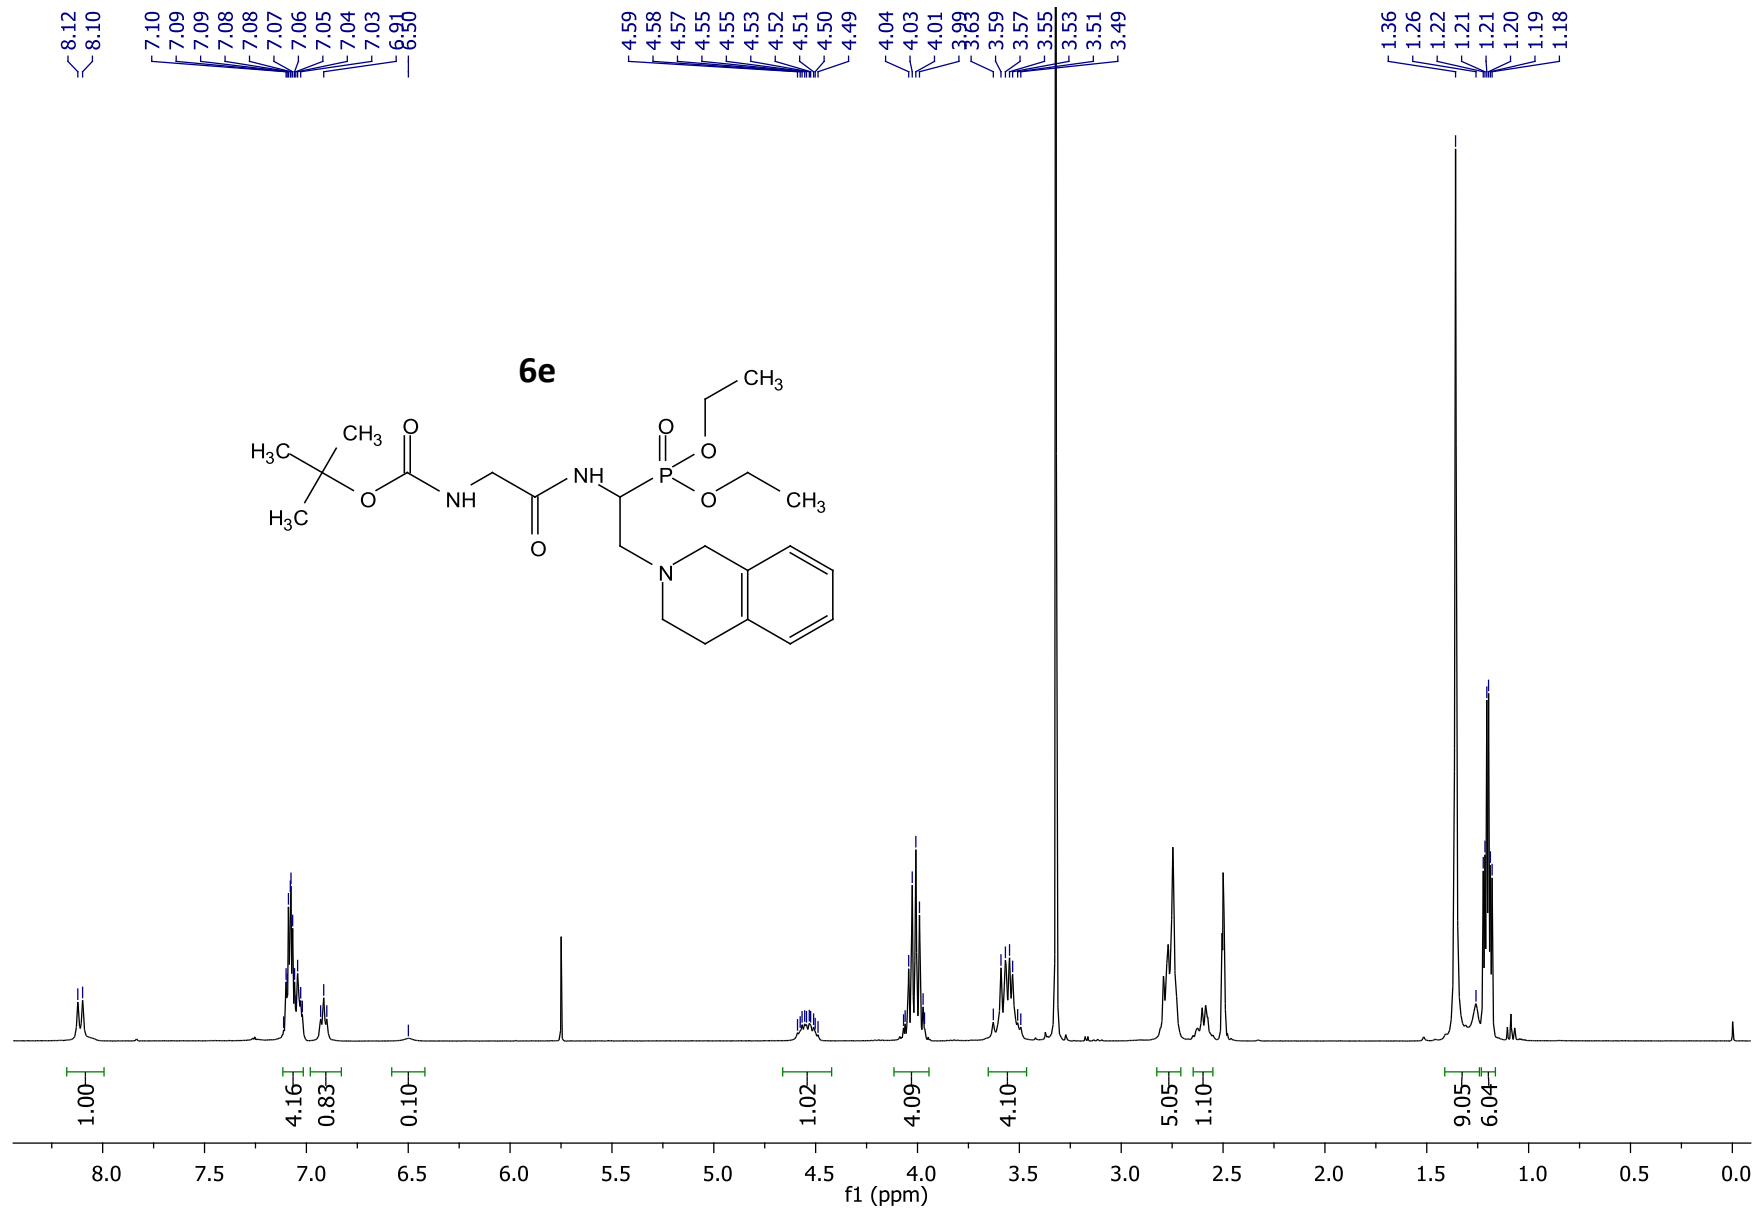

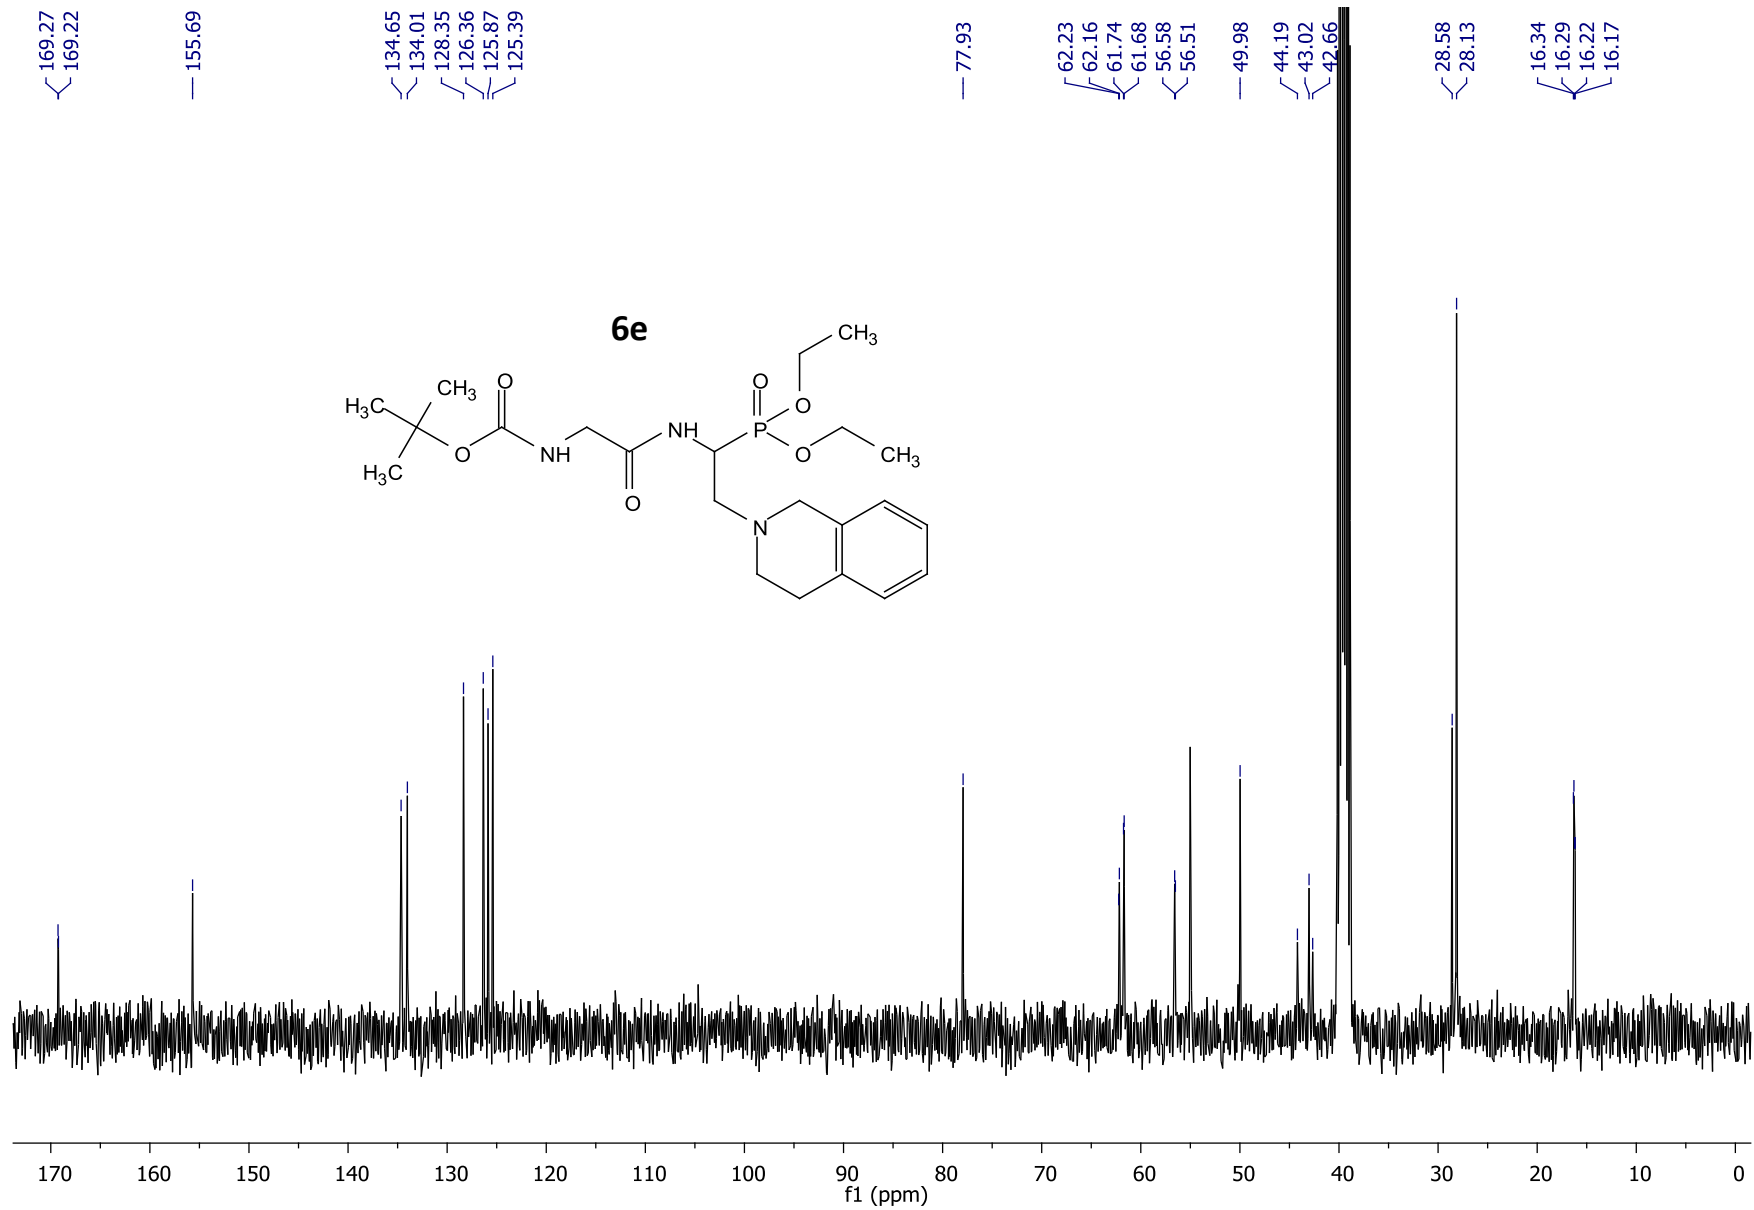

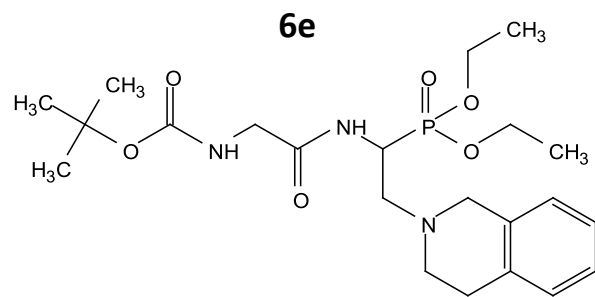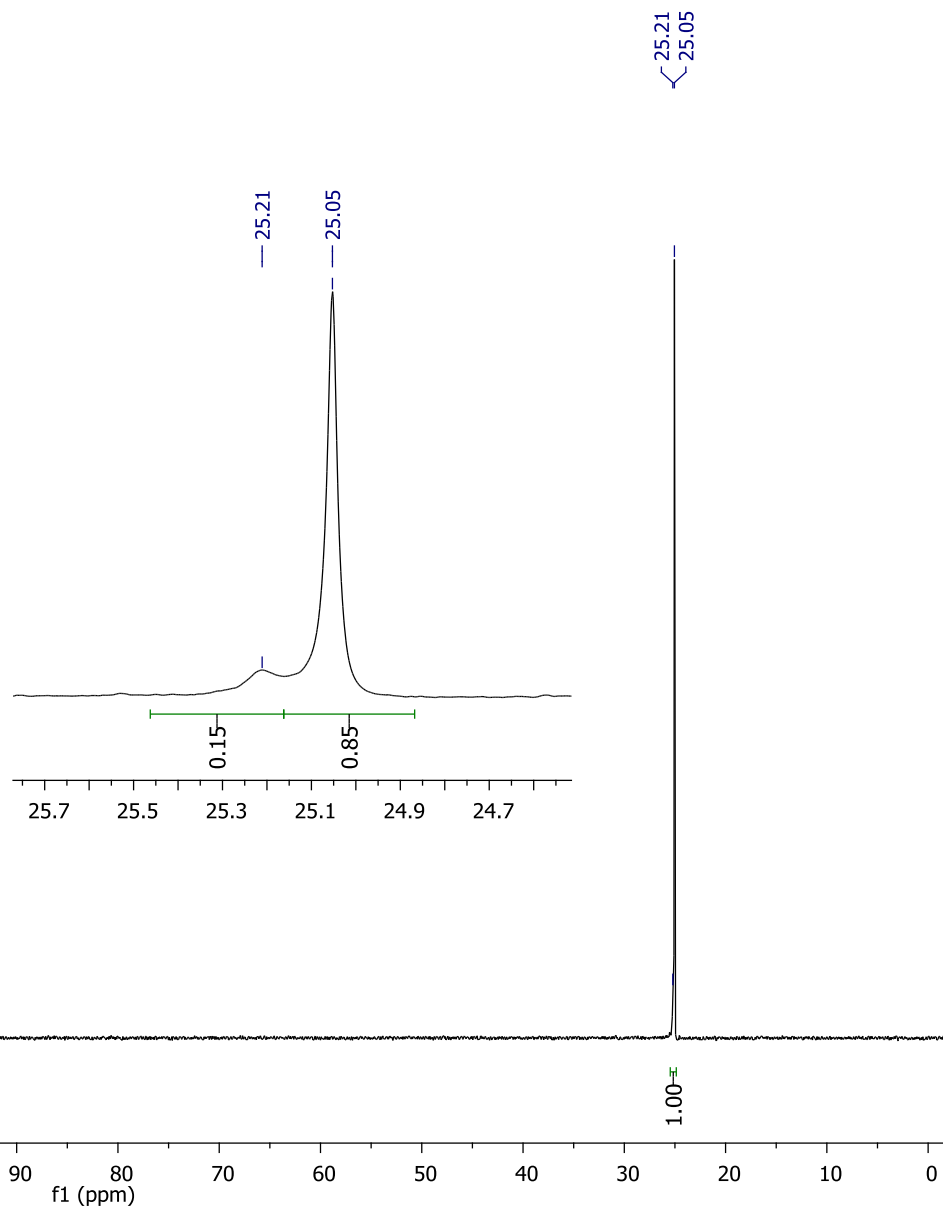

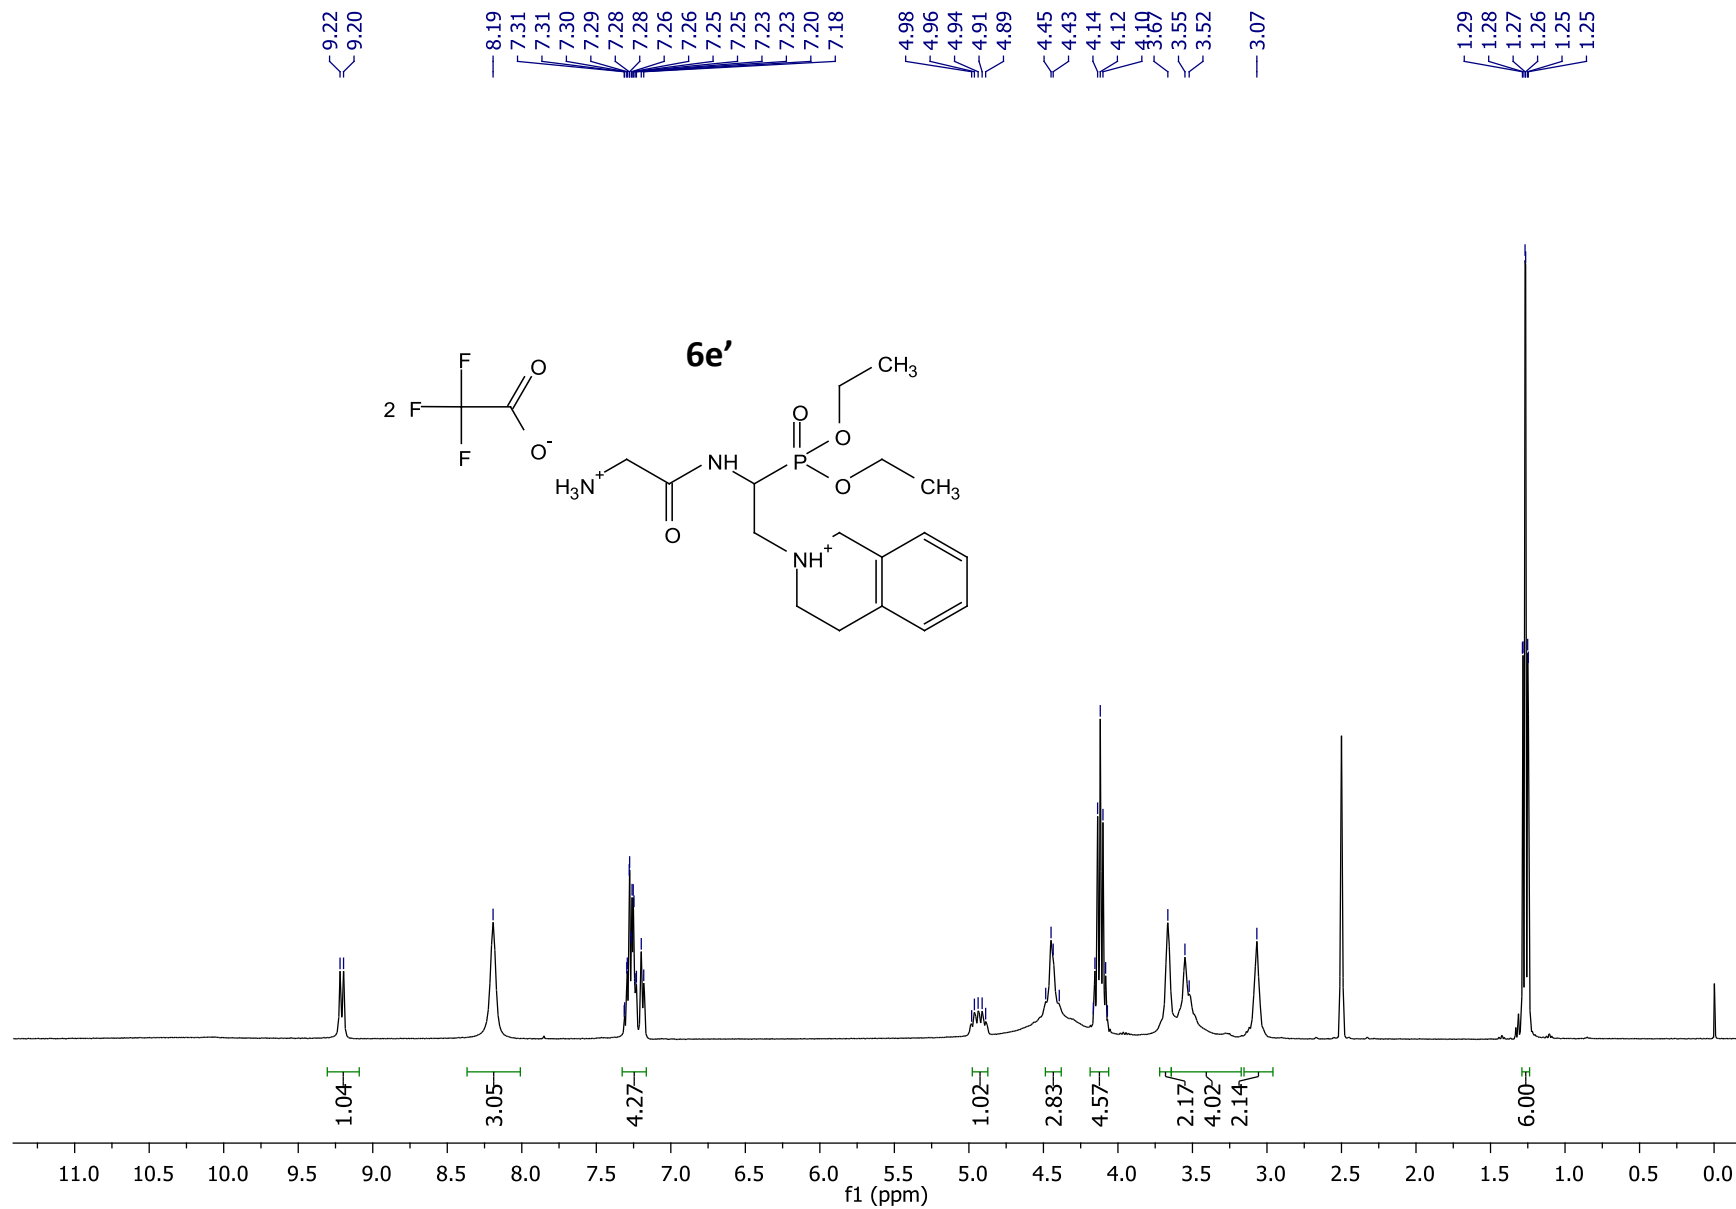

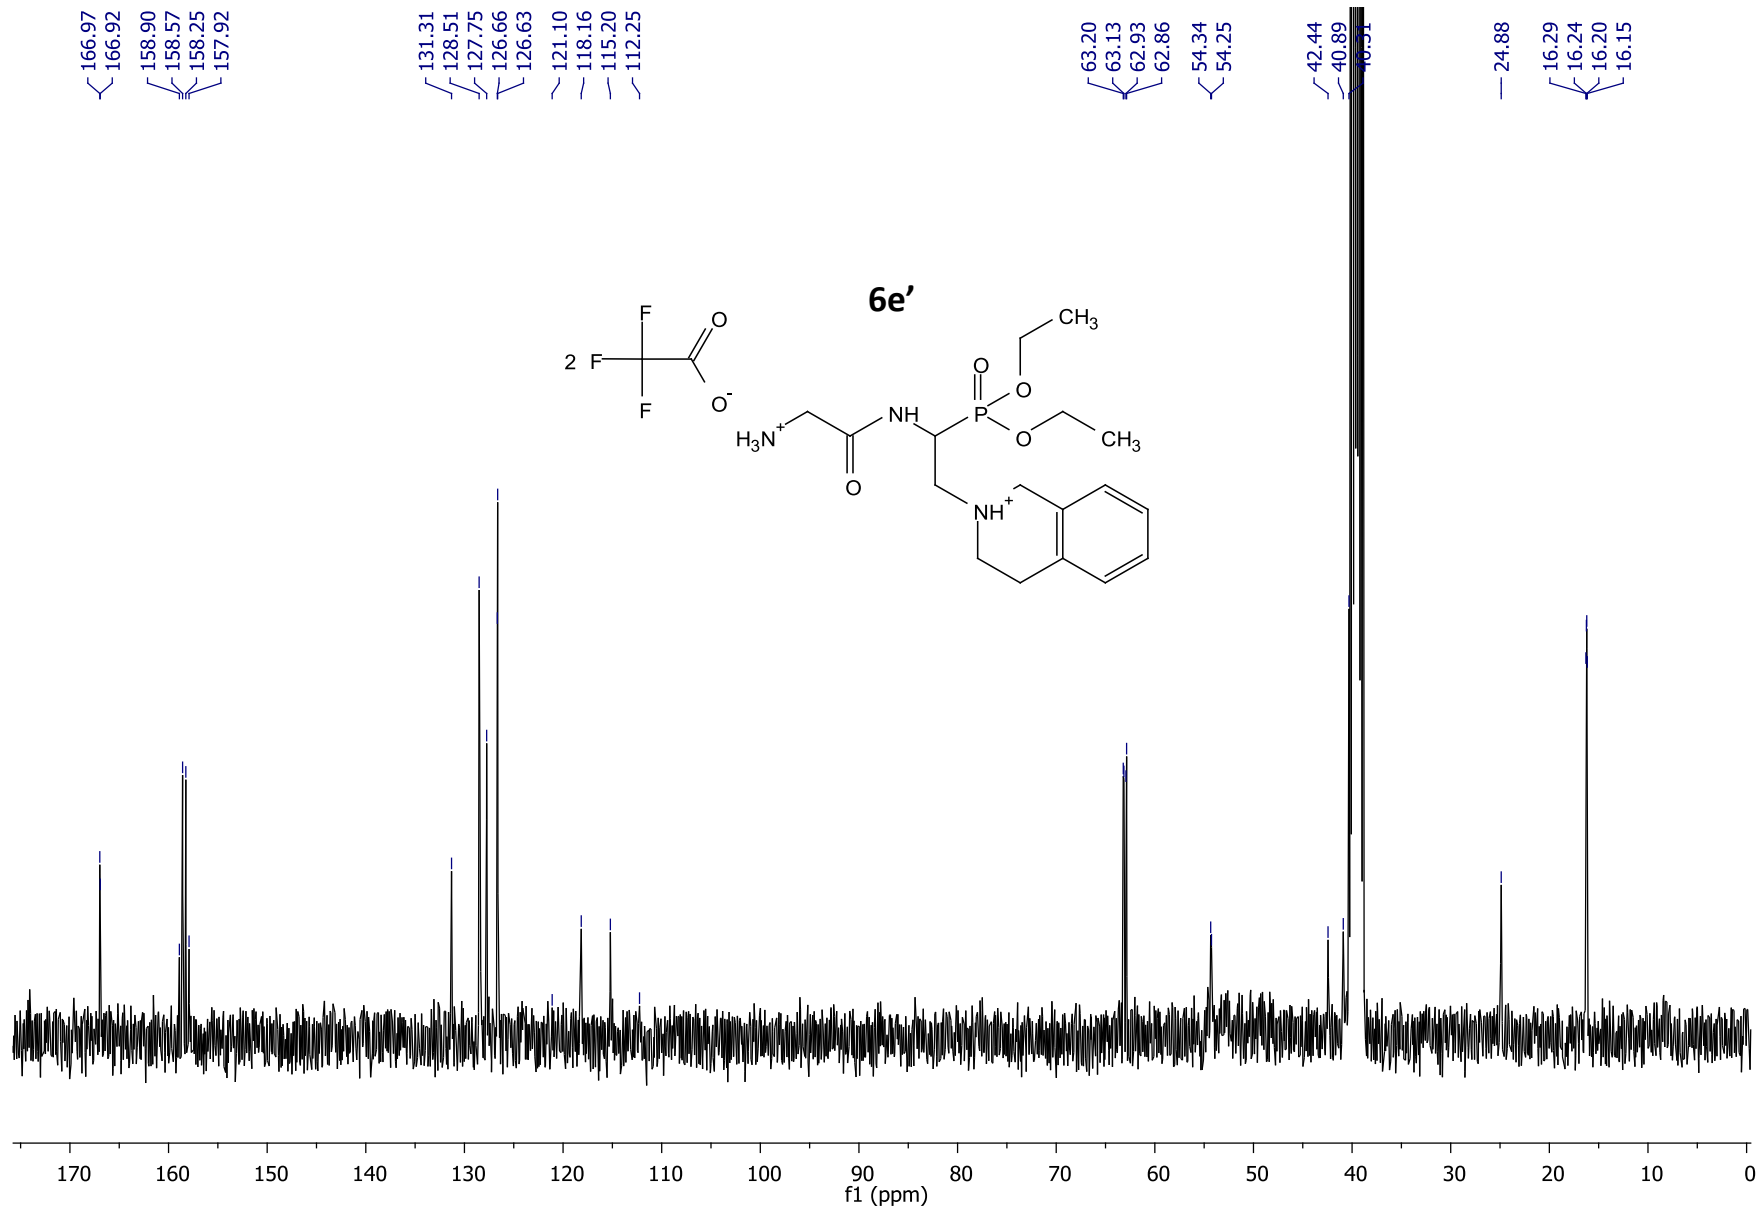

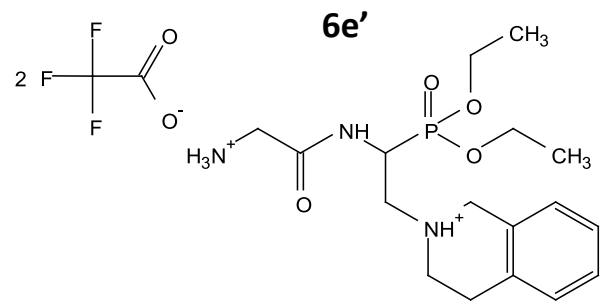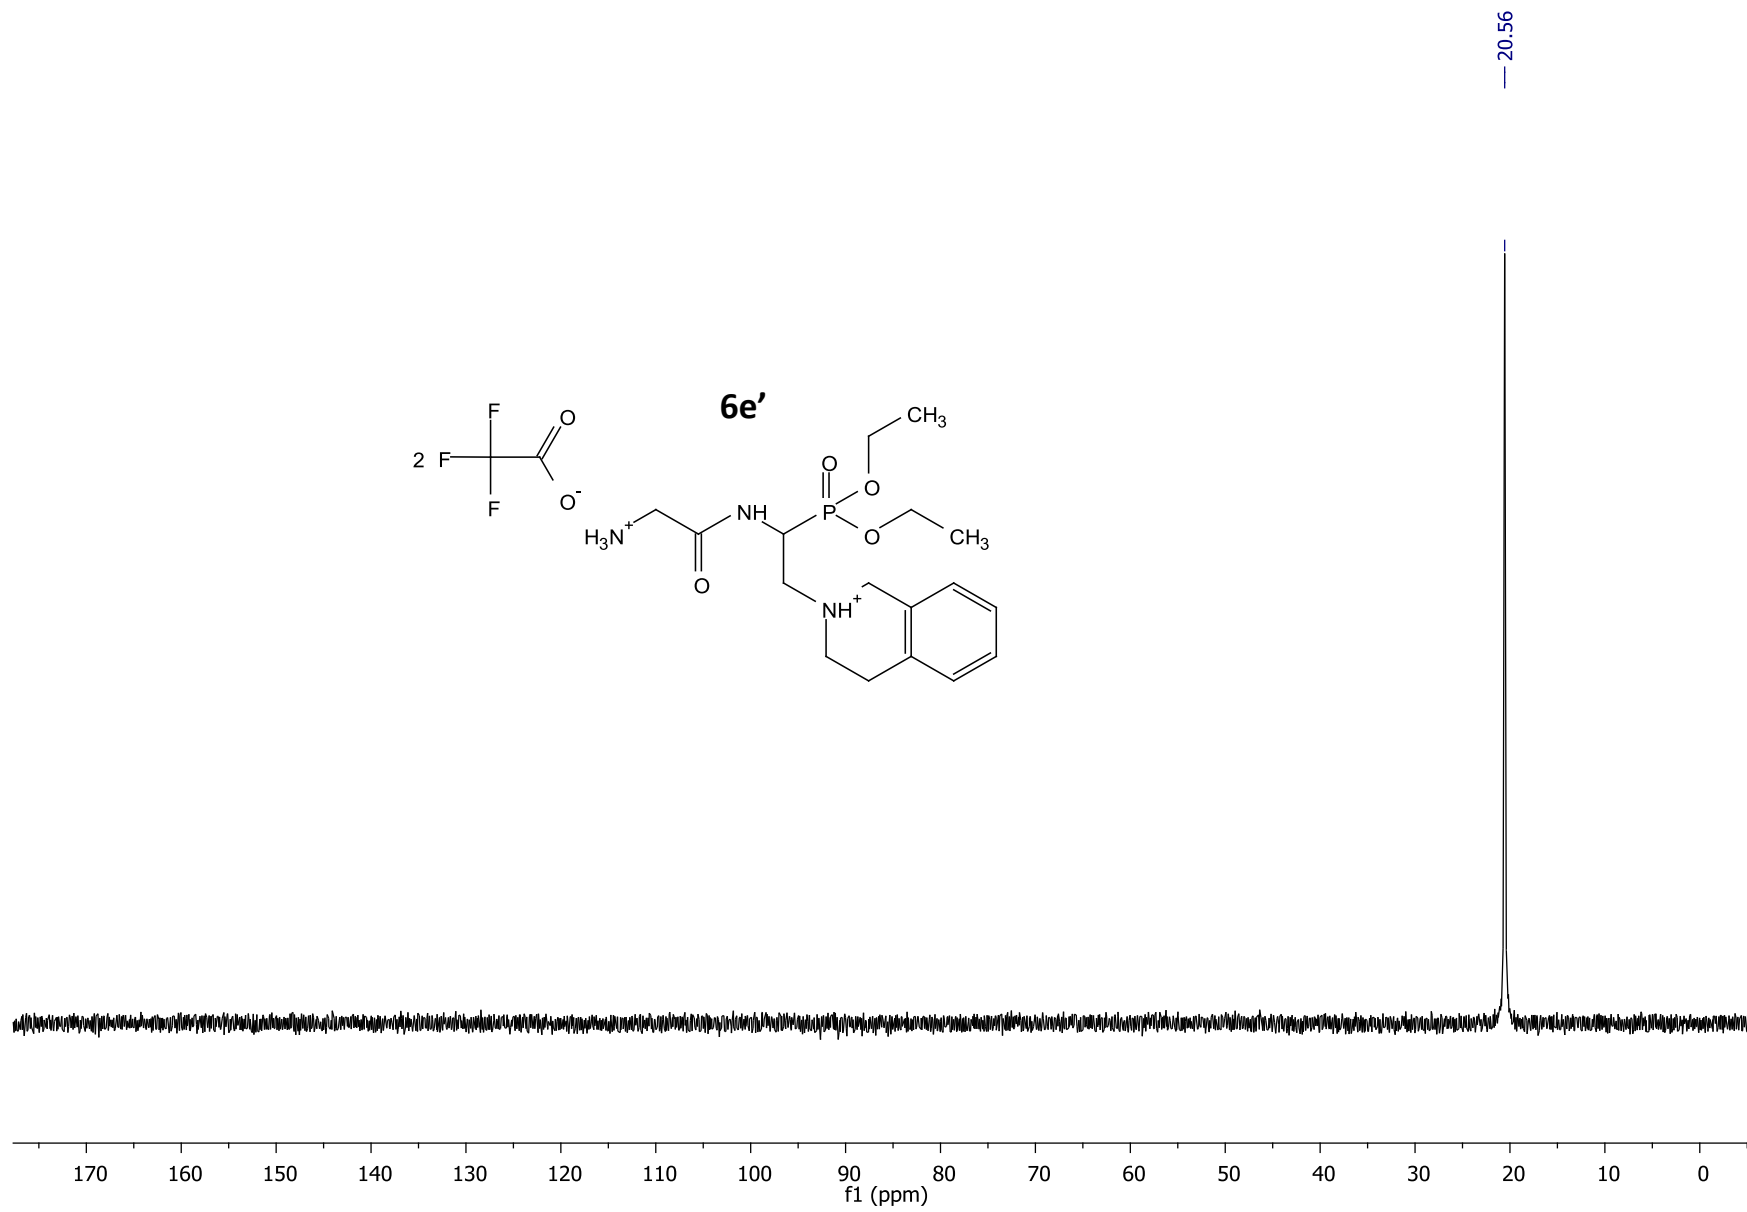

### 3. Crystallographic data

**Table S1:** Experimental details for **3** and **5**

|                                    | <b>3</b>                                          | <b>5</b>                                                        |
|------------------------------------|---------------------------------------------------|-----------------------------------------------------------------|
| CCDC No.                           | 1935968                                           | 1935969                                                         |
| Crystal data                       |                                                   |                                                                 |
| Chemical formula                   | C <sub>14</sub> H <sub>20</sub> NO <sub>5</sub> P | C <sub>13</sub> H <sub>25</sub> N <sub>2</sub> O <sub>6</sub> P |
| <i>M<sub>r</sub></i>               | 313.28                                            | 336.32                                                          |
| Crystal system, space group        | Monoclinic, <i>P2<sub>1</sub>/c</i>               | Monoclinic, <i>P2<sub>1</sub>/n</i>                             |
| <i>a</i> , <i>b</i> , <i>c</i> (Å) | 10.7418 (3), 10.0430 (2), 14.6765 (4)             | 9.9692 (3), 17.6005 (5), 10.3762 (3)                            |
| β (°)                              | 104.329 (3)                                       | 111.329 (4)                                                     |
| <i>V</i> (Å <sup>3</sup> )         | 1534.04 (7)                                       | 1695.94 (10)                                                    |
| μ (mm <sup>-1</sup> )              | 0.20                                              | 0.19                                                            |
| <i>Z</i>                           | 4                                                 | 4                                                               |
| μ (mm <sup>-1</sup> )              | 0.20                                              | 0.19                                                            |
| Crystal size (mm)                  | 0.4 × 0.3 × 0.2                                   | 0.5 × 0.3 × 0.1                                                 |
| Data collection                    |                                                   |                                                                 |



|                                                                               |                    |                    |
|-------------------------------------------------------------------------------|--------------------|--------------------|
| Absorption correction                                                         | –                  | –                  |
| No. of measured, independent and observed [ $I > 2\sigma(I)$ ] reflections    | 10172, 2987, 2459  | 11346, 3315, 2510  |
| $R_{\text{int}}$                                                              | 0.019              | 0.028              |
| $(\sin \theta/\lambda)_{\text{max}}$ ( $\text{\AA}^{-1}$ )                    | 0.617              | 0.617              |
| Refinement                                                                    |                    |                    |
| $R[F^2 > 2\sigma(F^2)]$ , $wR(F^2)$ , $S$                                     | 0.028, 0.077, 1.07 | 0.031, 0.071, 0.94 |
| No. of reflections                                                            | 2987               | 3315               |
| No. of parameters                                                             | 192                | 204                |
| $\Delta\rho_{\text{max}}$ , $\Delta\rho_{\text{min}}$ ( $\text{e \AA}^{-3}$ ) | 0.38, -0.34        | 0.36, -0.37        |

---

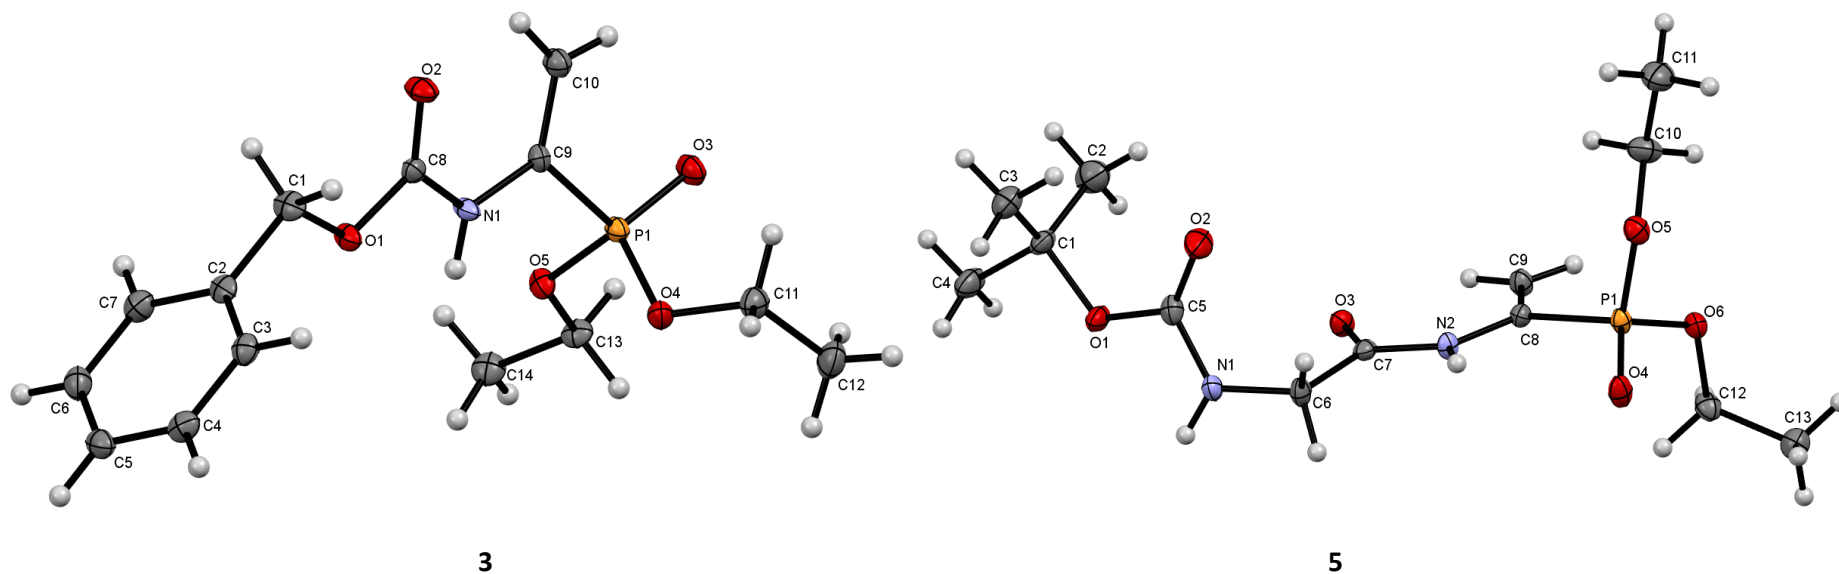

**Fig. S12** Molecular structures of the studied molecules in the asymmetric part of unit cell. Displacement ellipsoids are drawn at the 50% probability level.

**Table S2:** Selected geometric parameters (Å, °) for **3** and **5**.

| <b>3</b> |            |        |             |
|----------|------------|--------|-------------|
| P1—O3    | 1.4673 (9) | C5—H5  | 0.9300      |
| P1—O5    | 1.5666 (9) | O5—C13 | 1.4707 (14) |
| P1—O4    | 1.5816 (9) | C6—C7  | 1.3879 (18) |

|        |             |          |             |
|--------|-------------|----------|-------------|
| P1—C9  | 1.7977 (13) | C6—H6    | 0.9300      |
| O1—C8  | 1.3542 (15) | C7—H7    | 0.9300      |
| O1—C1  | 1.4532 (15) | C9—C10   | 1.3296 (17) |
| N1—C8  | 1.3597 (16) | C10—H10A | 0.9300      |
| N1—C9  | 1.4088 (16) | C10—H10B | 0.9300      |
| N1—H1  | 0.8600      | C11—C12  | 1.5032 (19) |
| C1—C2  | 1.4991 (18) | C11—H11A | 0.9700      |
| C1—H1A | 0.9700      | C11—H11B | 0.9700      |
| C1—H1B | 0.9700      | C12—H12A | 0.9600      |
| O2—C8  | 1.2099 (15) | C12—H12B | 0.9600      |
| C2—C7  | 1.3894 (19) | C12—H12C | 0.9600      |
| C2—C3  | 1.3933 (18) | C13—C14  | 1.5019 (18) |
| C3—C4  | 1.3896 (19) | C13—H13A | 0.9700      |
| C3—H3  | 0.9300      | C13—H13B | 0.9700      |
| C4—C5  | 1.3838 (19) | C14—H14A | 0.9600      |

|           |             |               |             |
|-----------|-------------|---------------|-------------|
| C4—H4     | 0.9300      | C14—H14B      | 0.9600      |
| O4—C11    | 1.4579 (15) | C14—H14C      | 0.9600      |
| C5—C6     | 1.386 (2)   |               |             |
| O3—P1—O5  | 116.33 (5)  | C2—C7—H7      | 119.8       |
| O3—P1—O4  | 114.28 (5)  | O2—C8—O1      | 123.66 (12) |
| O5—P1—O4  | 102.90 (5)  | O2—C8—N1      | 126.98 (12) |
| O3—P1—C9  | 112.34 (6)  | O1—C8—N1      | 109.36 (10) |
| O5—P1—C9  | 102.63 (5)  | C10—C9—N1     | 126.85 (12) |
| O4—P1—C9  | 107.16 (5)  | C10—C9—P1     | 116.47 (10) |
| C8—O1—C1  | 114.44 (10) | N1—C9—P1      | 116.67 (9)  |
| C8—N1—C9  | 124.25 (11) | C9—C10—H10A   | 120.0       |
| C8—N1—H1  | 117.9       | C9—C10—H10B   | 120.0       |
| C9—N1—H1  | 117.9       | H10A—C10—H10B | 120.0       |
| O1—C1—C2  | 107.07 (10) | O4—C11—C12    | 109.80 (11) |
| O1—C1—H1A | 110.3       | O4—C11—H11A   | 109.7       |

|            |             |               |             |
|------------|-------------|---------------|-------------|
| C2—C1—H1A  | 110.3       | C12—C11—H11A  | 109.7       |
| O1—C1—H1B  | 110.3       | O4—C11—H11B   | 109.7       |
| C2—C1—H1B  | 110.3       | C12—C11—H11B  | 109.7       |
| H1A—C1—H1B | 108.6       | H11A—C11—H11B | 108.2       |
| C7—C2—C3   | 119.17 (13) | C11—C12—H12A  | 109.5       |
| C7—C2—C1   | 120.45 (12) | C11—C12—H12B  | 109.5       |
| C3—C2—C1   | 120.38 (12) | H12A—C12—H12B | 109.5       |
| C4—C3—C2   | 120.25 (12) | C11—C12—H12C  | 109.5       |
| C4—C3—H3   | 119.9       | H12A—C12—H12C | 109.5       |
| C2—C3—H3   | 119.9       | H12B—C12—H12C | 109.5       |
| C5—C4—C3   | 120.20 (13) | O5—C13—C14    | 107.14 (10) |
| C5—C4—H4   | 119.9       | O5—C13—H13A   | 110.3       |
| C3—C4—H4   | 119.9       | C14—C13—H13A  | 110.3       |
| C11—O4—P1  | 120.06 (8)  | O5—C13—H13B   | 110.3       |
| C4—C5—C6   | 119.81 (13) | C14—C13—H13B  | 110.3       |

|              |              |               |             |
|--------------|--------------|---------------|-------------|
| C4—C5—H5     | 120.1        | H13A—C13—H13B | 108.5       |
| C6—C5—H5     | 120.1        | C13—C14—H14A  | 109.5       |
| C13—O5—P1    | 119.53 (8)   | C13—C14—H14B  | 109.5       |
| C5—C6—C7     | 120.15 (13)  | H14A—C14—H14B | 109.5       |
| C5—C6—H6     | 119.9        | C13—C14—H14C  | 109.5       |
| C7—C6—H6     | 119.9        | H14A—C14—H14C | 109.5       |
| C6—C7—C2     | 120.43 (13)  | H14B—C14—H14C | 109.5       |
| C6—C7—H7     | 119.8        |               |             |
| C8—O1—C1—C2  | -178.57 (10) | C1—C2—C7—C6   | 179.86 (12) |
| O1—C1—C2—C7  | -78.83 (15)  | C1—O1—C8—O2   | -3.16 (18)  |
| O1—C1—C2—C3  | 101.51 (14)  | C1—O1—C8—N1   | 177.01 (10) |
| C7—C2—C3—C4  | 0.54 (19)    | C9—N1—C8—O2   | -2.2 (2)    |
| C1—C2—C3—C4  | -179.79 (12) | C9—N1—C8—O1   | 177.62 (11) |
| C2—C3—C4—C5  | 0.0 (2)      | C8—N1—C9—C10  | -11.3 (2)   |
| O3—P1—O4—C11 | 32.10 (11)   | C8—N1—C9—P1   | 167.72 (10) |

|              |             |               |              |
|--------------|-------------|---------------|--------------|
| O5—P1—O4—C11 | 159.15 (9)  | O3—P1—C9—C10  | 0.06 (13)    |
| C9—P1—O4—C11 | -93.06 (10) | O5—P1—C9—C10  | -125.65 (11) |
| C3—C4—C5—C6  | -0.69 (19)  | O4—P1—C9—C10  | 126.38 (10)  |
| O3—P1—O5—C13 | 43.69 (11)  | O3—P1—C9—N1   | -179.06 (9)  |
| O4—P1—O5—C13 | -82.04 (9)  | O5—P1—C9—N1   | 55.24 (10)   |
| C9—P1—O5—C13 | 166.76 (9)  | O4—P1—C9—N1   | -52.74 (10)  |
| C4—C5—C6—C7  | 0.7 (2)     | P1—O4—C11—C12 | -104.59 (11) |
| C5—C6—C7—C2  | -0.2 (2)    | P1—O5—C13—C14 | -174.30 (9)  |
| C3—C2—C7—C6  | -0.48 (19)  |               |              |

---

**5**

---

|       |             |        |        |
|-------|-------------|--------|--------|
| P1—O4 | 1.4629 (10) | C3—H3B | 0.9600 |
| P1—O5 | 1.5649 (10) | C3—H3C | 0.9600 |
| P1—O6 | 1.5696 (10) | C4—H4A | 0.9600 |
| P1—C8 | 1.8042 (14) | C4—H4B | 0.9600 |
| N1—C5 | 1.3498 (18) | C4—H4C | 0.9600 |

|        |             |          |             |
|--------|-------------|----------|-------------|
| N1—C6  | 1.4379 (18) | C6—C7    | 1.5279 (19) |
| N1—H1  | 0.8600      | C6—H6A   | 0.9700      |
| N2—C7  | 1.3560 (17) | C6—H6B   | 0.9700      |
| N2—C8  | 1.4089 (17) | C8—C9    | 1.3316 (19) |
| N2—H2  | 0.8600      | C9—H9A   | 0.9300      |
| O1—C5  | 1.3522 (17) | C9—H9B   | 0.9300      |
| O1—C1  | 1.4785 (17) | C10—C11  | 1.495 (2)   |
| O2—C5  | 1.2099 (17) | C10—H10A | 0.9700      |
| O3—C7  | 1.2230 (16) | C10—H10B | 0.9700      |
| O5—C10 | 1.4571 (17) | C11—H11A | 0.9600      |
| O6—C12 | 1.4623 (17) | C11—H11B | 0.9600      |
| C1—C2  | 1.511 (2)   | C11—H11C | 0.9600      |
| C1—C3  | 1.516 (2)   | C12—C13  | 1.493 (2)   |
| C1—C4  | 1.517 (2)   | C12—H12A | 0.9700      |
| C2—H2A | 0.9600      | C12—H12B | 0.9700      |



|          |             |            |             |
|----------|-------------|------------|-------------|
| C2—H2B   | 0.9600      | C13—H13A   | 0.9600      |
| C2—H2C   | 0.9600      | C13—H13B   | 0.9600      |
| C3—H3A   | 0.9600      | C13—H13C   | 0.9600      |
| O4—P1—O5 | 111.55 (6)  | N1—C5—O1   | 109.44 (12) |
| O4—P1—O6 | 115.90 (6)  | N1—C6—C7   | 112.30 (11) |
| O5—P1—O6 | 102.84 (5)  | N1—C6—H6A  | 109.1       |
| O4—P1—C8 | 112.12 (6)  | C7—C6—H6A  | 109.1       |
| O5—P1—C8 | 108.05 (6)  | N1—C6—H6B  | 109.1       |
| O6—P1—C8 | 105.68 (6)  | C7—C6—H6B  | 109.1       |
| C5—N1—C6 | 119.26 (12) | H6A—C6—H6B | 107.9       |
| C5—N1—H1 | 120.4       | O3—C7—N2   | 124.28 (13) |
| C6—N1—H1 | 120.4       | O3—C7—C6   | 121.81 (12) |
| C7—N2—C8 | 125.70 (12) | N2—C7—C6   | 113.91 (12) |
| C7—N2—H2 | 117.2       | C9—C8—N2   | 127.15 (13) |
| C8—N2—H2 | 117.2       | C9—C8—P1   | 119.33 (11) |

|            |             |               |             |
|------------|-------------|---------------|-------------|
| C5—O1—C1   | 121.05 (11) | N2—C8—P1      | 113.49 (10) |
| C10—O5—P1  | 122.64 (9)  | C8—C9—H9A     | 120.0       |
| C12—O6—P1  | 118.76 (9)  | C8—C9—H9B     | 120.0       |
| O1—C1—C2   | 110.53 (12) | H9A—C9—H9B    | 120.0       |
| O1—C1—C3   | 110.55 (12) | O5—C10—C11    | 108.17 (12) |
| C2—C1—C3   | 111.86 (13) | O5—C10—H10A   | 110.1       |
| O1—C1—C4   | 101.93 (11) | C11—C10—H10A  | 110.1       |
| C2—C1—C4   | 111.05 (13) | O5—C10—H10B   | 110.1       |
| C3—C1—C4   | 110.49 (13) | C11—C10—H10B  | 110.1       |
| C1—C2—H2A  | 109.5       | H10A—C10—H10B | 108.4       |
| C1—C2—H2B  | 109.5       | C10—C11—H11A  | 109.5       |
| H2A—C2—H2B | 109.5       | C10—C11—H11B  | 109.5       |
| C1—C2—H2C  | 109.5       | H11A—C11—H11B | 109.5       |
| H2A—C2—H2C | 109.5       | C10—C11—H11C  | 109.5       |
| H2B—C2—H2C | 109.5       | H11A—C11—H11C | 109.5       |

|              |             |               |             |
|--------------|-------------|---------------|-------------|
| C1—C3—H3A    | 109.5       | H11B—C11—H11C | 109.5       |
| C1—C3—H3B    | 109.5       | O6—C12—C13    | 109.27 (12) |
| H3A—C3—H3B   | 109.5       | O6—C12—H12A   | 109.8       |
| C1—C3—H3C    | 109.5       | C13—C12—H12A  | 109.8       |
| H3A—C3—H3C   | 109.5       | O6—C12—H12B   | 109.8       |
| H3B—C3—H3C   | 109.5       | C13—C12—H12B  | 109.8       |
| C1—C4—H4A    | 109.5       | H12A—C12—H12B | 108.3       |
| C1—C4—H4B    | 109.5       | C12—C13—H13A  | 109.5       |
| H4A—C4—H4B   | 109.5       | C12—C13—H13B  | 109.5       |
| C1—C4—H4C    | 109.5       | H13A—C13—H13B | 109.5       |
| H4A—C4—H4C   | 109.5       | C12—C13—H13C  | 109.5       |
| H4B—C4—H4C   | 109.5       | H13A—C13—H13C | 109.5       |
| O2—C5—N1     | 124.57 (14) | H13B—C13—H13C | 109.5       |
| O2—C5—O1     | 125.98 (14) |               |             |
| O4—P1—O5—C10 | 176.90 (11) | C8—N2—C7—O3   | -3.7 (2)    |

|              |              |               |              |
|--------------|--------------|---------------|--------------|
| O6—P1—O5—C10 | 52.03 (12)   | C8—N2—C7—C6   | 175.79 (12)  |
| C8—P1—O5—C10 | -59.44 (13)  | N1—C6—C7—O3   | -5.60 (19)   |
| O4—P1—O6—C12 | 51.58 (11)   | N1—C6—C7—N2   | 174.88 (12)  |
| O5—P1—O6—C12 | 173.55 (9)   | C7—N2—C8—C9   | 2.5 (2)      |
| C8—P1—O6—C12 | -73.24 (11)  | C7—N2—C8—P1   | -179.20 (11) |
| C5—O1—C1—C2  | 61.35 (17)   | O4—P1—C8—C9   | -152.90 (11) |
| C5—O1—C1—C3  | -63.06 (17)  | O5—P1—C8—C9   | 83.77 (13)   |
| C5—O1—C1—C4  | 179.46 (12)  | O6—P1—C8—C9   | -25.76 (13)  |
| C6—N1—C5—O2  | -13.2 (2)    | O4—P1—C8—N2   | 28.64 (12)   |
| C6—N1—C5—O1  | 167.57 (11)  | O5—P1—C8—N2   | -94.68 (10)  |
| C1—O1—C5—O2  | 3.9 (2)      | O6—P1—C8—N2   | 155.78 (9)   |
| C1—O1—C5—N1  | -176.89 (11) | P1—O5—C10—C11 | 179.43 (10)  |
| C5—N1—C6—C7  | -68.01 (17)  | P1—O6—C12—C13 | -115.75 (11) |

**Table S3:** Selected hydrogen-bond parameters for **3** and **5**.

| $D-H\cdots A$                      | $D-H$ (Å) | $H\cdots A$ (Å) | $D\cdots A$ (Å) | $D-H\cdots A$ (°) |
|------------------------------------|-----------|-----------------|-----------------|-------------------|
| <b>3</b>                           |           |                 |                 |                   |
| N1—H1 $\cdots$ O3 <sup>i</sup>     | 0.86      | 2.00            | 2.8401 (14)     | 166.9             |
| C10—H10A $\cdots$ O2               | 0.93      | 2.29            | 2.8695 (16)     | 120.1             |
| C14—H14A $\cdots$ O1 <sup>ii</sup> | 0.96      | 2.63            | 3.5318 (17)     | 157.0             |
| <b>5</b>                           |           |                 |                 |                   |
| N1—H1 $\cdots$ O3 <sup>iii</sup>   | 0.86      | 2.16            | 2.9800 (15)     | 159.6             |
| N2—H2 $\cdots$ O4                  | 0.86      | 2.58            | 2.9898 (15)     | 110.5             |
| N2—H2 $\cdots$ O4 <sup>iv</sup>    | 0.86      | 2.07            | 2.8633 (15)     | 153.8             |
| C2—H2B $\cdots$ O2                 | 0.96      | 2.49            | 3.041 (2)       | 116.7             |
| C3—H3B $\cdots$ O2                 | 0.96      | 2.46            | 3.0163 (19)     | 116.8             |
| C4—H4A $\cdots$ O2 <sup>v</sup>    | 0.96      | 2.44            | 3.3504 (19)     | 157.2             |
| C9—H9A $\cdots$ O3                 | 0.93      | 2.25            | 2.8474 (17)     | 121.3             |
| C12—H12A $\cdots$ O3 <sup>vi</sup> | 0.97      | 2.46            | 3.4329 (18)     | 178.3             |

Symmetry code(s): (i)  $-x+1, y-1/2, -z+1/2$ ; (ii)  $x, -y+3/2, z-1/2$ ; (iii)  $-x, -y+1, -z+1$ ; (iv)  $-x+1, -y+1, -z+2$ ; (v)  $x-1/2, -y+3/2, z-1/2$ ; (vi)  $-x+1, -y+1, -z+1$ .
